# Supplementary material
Source: publisher figshare collection journal article supplement (https://frontiersin.figshare.com/ndownloader/files/28396665)
Supplement: Supplementary file 2 [file 28396665]

Archive with 10 entries (10 files):
- Data Sheet 1.ZIP
- Data Sheet 2.pdf
- Table 1.XLSX
- Table 2.ZIP
- Table 3.XLSX
- Table 4.XLSX
- Table 5.ZIP
- Table 6.XLSX
- Table 7.XLSX
- Table 8.XLSX
