# Supplementary material
Source: publisher figshare collection journal article supplement (https://frontiersin.figshare.com/ndownloader/files/28396665)
Supplement: Supplementary file 2 [file 28396665 › Table 1.XLSX]

## Sheet: Table 1
O2 concentrations from within the egg gas cell obtained during incubation of unfertilized eggs
2019					2020						Obtained by
t [s]	CEM4_O2 [moles/m^3]	CEM5_O2 [moles/m^3]			t6 [s]	CNE6_O2 [moles/m^3]	t7 [s]	CNE7_O2 [moles/m^3]			CEM	Emma Hammarlund
0	7.69872	7.69872			0.737	6.47703	0.737	6.47703			CNE	Niklas Engstrom
1.00001	7.69873	7.69873			1.738	6.47696	1.738	6.47696
2.00001	7.69875	7.69875			2.75	6.47696	2.75	6.47696
3.00002	7.69879	7.69879			3.766	6.47597	3.766	6.47597
4.00002	7.69883	7.69883			4.825	6.47635	4.825	6.47635
5.00003	7.69889	7.69889			5.768	6.48574	5.768	6.48574
6.00004	7.69895	7.69895			6.768	6.483	6.768	6.483
7.00004	7.69903	7.69903			7.768	6.47818	7.768	6.47818
8.00005	7.69912	7.69912			8.77	6.48253	8.77	6.48253
9.00005	7.69922	7.69922			9.801	6.48406	9.801	6.48406
10.0001	7.69933	7.69933			10.784	6.48508	10.784	6.48508
11.0001	7.69945	7.69945			11.784	6.48245	11.784	6.48245
12.0001	7.69958	7.69958			12.785	6.48666	12.785	6.48666
13.0001	7.69973	7.69973			13.798	6.48741	13.798	6.48741
14.0001	7.69988	7.69988			14.823	6.48743	14.823	6.48743
15.0001	7.70005	7.70005			15.815	6.48982	15.815	6.48982
16.0001	7.70024	7.70024			16.829	6.48817	16.829	6.48817
17.0001	7.70046	7.70046			17.844	6.49047	17.844	6.49047
18.0001	7.7007	7.7007			18.844	6.49149	18.844	6.49149
19.0001	7.70094	7.70094			19.844	6.4918	19.844	6.4918
20.0001	7.70119	7.70119			20.844	6.49386	20.844	6.49386
21.0001	7.70144	7.70144			21.845	6.49235	21.845	6.49235
22.0001	7.70167	7.70167			22.845	6.49335	22.845	6.49335
23.0001	7.70189	7.70189			23.846	6.49592	23.846	6.49592
24.0001	7.70209	7.70209			24.845	6.49595	24.845	6.49595
25.0001	7.70226	7.70226			25.86	6.4959	25.86	6.4959
26.0002	7.7024	7.7024			26.877	6.49506	26.877	6.49506
27.0002	7.70253	7.70253			27.882	6.49897	27.882	6.49897
28.0002	7.70264	7.70264			28.893	6.49936	28.893	6.49936
29.0002	7.70273	7.70273			29.906	6.50022	29.906	6.50022
30.0002	7.70282	7.70282			30.907	6.49944	30.907	6.49944
31.0002	7.70292	7.70292			31.908	6.5071	31.908	6.5071
32.0002	7.70301	7.70301			32.923	6.51182	32.923	6.51182
33.0002	7.70311	7.70311			33.923	6.49846	33.923	6.49846
34.0002	7.70323	7.70323			34.924	6.55735	34.924	6.55735
35.0002	7.70336	7.70336			35.926	6.62078	35.926	6.62078
36.0002	7.70349	7.70349			36.926	6.62084	36.926	6.62084
37.0002	7.70362	7.70362			37.94	6.54191	37.94	6.54191
38.0002	7.70376	7.70376			38.953	6.48808	38.953	6.48808
39.0002	7.70391	7.70391			39.955	6.56656	39.955	6.56656
40.0002	7.70405	7.70405			40.969	6.53865	40.969	6.53865
41.0002	7.70421	7.70421			41.985	6.60146	41.985	6.60146
42.0003	7.70438	7.70438			42.985	6.54233	42.985	6.54233
43.0003	7.70455	7.70455			43.986	6.53196	43.986	6.53196
44.0003	7.70474	7.70474			45	6.52588	45	6.52588
45.0003	7.70493	7.70493			46.021	6.51883	46.021	6.51883
46.0003	7.70515	7.70515			47.031	6.51004	47.031	6.51004
47.0003	7.70538	7.70538			48.048	6.51012	48.048	6.51012
48.0003	7.70562	7.70562			49.049	6.54932	49.049	6.54932
49.0003	7.70588	7.70588			50.05	6.52544	50.05	6.52544
50.0003	7.70613	7.70613			51.051	6.5264	51.051	6.5264
51.0003	7.70639	7.70639			52.052	6.52574	52.052	6.52574
52.0003	7.70665	7.70665			53.064	6.52858	53.064	6.52858
53.0003	7.7069	7.7069			54.079	6.52881	54.079	6.52881
54.0003	7.70715	7.70715			55.08	6.52984	55.08	6.52984
55.0003	7.70738	7.70738			56.081	6.53196	56.081	6.53196
56.0003	7.70762	7.70762			57.081	6.53328	57.081	6.53328
57.0003	7.70786	7.70786			58.082	6.53425	58.082	6.53425
58.0003	7.70809	7.70809			59.082	6.53635	59.082	6.53635
59.0004	7.70833	7.70833			60.097	6.53644	60.097	6.53644
60.0004	7.70856	7.70856			61.109	6.53708	61.109	6.53708
61.0004	7.70878	7.70878			62.111	6.54027	62.111	6.54027
62.0004	7.709	7.709			63.126	6.53867	63.126	6.53867
63.0004	7.70921	7.70921			64.126	6.5424	64.126	6.5424
64.0004	7.7094	7.7094			65.126	6.54444	65.126	6.54444
65.0004	7.70957	7.70957			66.128	6.54431	66.128	6.54431
66.0004	7.70966	7.70966			67.128	6.54581	67.128	6.54581
67.0004	7.70967	7.70967			68.129	6.54769	68.129	6.54769
68.0004	7.70964	7.70964			69.13	6.54624	69.13	6.54624
69.0004	7.7096	7.7096			70.142	6.5507	70.142	6.5507
70.0004	7.70959	7.70959			71.156	6.55247	71.156	6.55247
71.0004	7.70963	7.70963			72.157	6.55255	72.157	6.55255
72.0004	7.70977	7.70977			73.172	6.5533	73.172	6.5533
73.0004	7.71003	7.71003			74.171	6.55606	74.171	6.55606
74.0004	7.71046	7.71046			75.172	6.55645	75.172	6.55645
75.0004	7.71108	7.71108			76.174	6.5589	76.174	6.5589
76.0005	7.71194	7.71194			77.177	6.56126	77.177	6.56126
77.0005	7.71301	7.71301			78.187	6.56297	78.187	6.56297
78.0005	7.71423	7.71423			79.188	6.56308	79.188	6.56308
79.0005	7.71556	7.71556			80.188	6.56595	80.188	6.56595
80.0005	7.71695	7.71695			81.19	6.56691	81.19	6.56691
81.0005	7.71833	7.71833			82.19	6.56697	82.19	6.56697
82.0005	7.71967	7.71967			83.191	6.56848	83.191	6.56848
83.0005	7.7209	7.7209			84.191	6.57148	84.191	6.57148
84.0005	7.72198	7.72198			85.205	6.57347	85.205	6.57347
85.0005	7.72286	7.72286			86.206	6.57532	86.206	6.57532
86.0005	7.72357	7.72357			87.206	6.57558	87.206	6.57558
87.0005	7.72414	7.72414			88.207	6.57939	88.207	6.57939
88.0005	7.72462	7.72462			89.209	6.58012	89.209	6.58012
89.0005	7.72502	7.72502			90.22	6.58431	90.22	6.58431
90.0005	7.72539	7.72539			91.22	6.57501	91.22	6.57501
91.0005	7.72575	7.72575			92.222	6.57502	92.222	6.57502
92.0005	7.72613	7.72613			93.222	6.5787	93.222	6.5787
93.0006	7.72656	7.72656			94.224	6.57873	94.224	6.57873
94.0006	7.72707	7.72707			95.236	6.58048	95.236	6.58048
95.0006	7.72769	7.72769			96.25	6.58209	96.25	6.58209
96.0006	7.7284	7.7284			97.251	6.58816	97.251	6.58816
97.0006	7.72918	7.72918			98.266	6.58699	98.266	6.58699
98.0006	7.73	7.73			99.267	6.58943	99.267	6.58943
99.0006	7.73086	7.73086			100.281	6.59197	100.281	6.59197
100.001	7.73174	7.73174			101.282	6.59187	101.282	6.59187
101.001	7.73262	7.73262			102.283	6.59558	102.283	6.59558
102.001	7.73349	7.73349			103.284	6.59624	103.284	6.59624
103.001	7.73434	7.73434			104.284	6.5997	104.284	6.5997
104.001	7.73515	7.73515			105.284	6.5991	105.284	6.5991
105.001	7.73591	7.73591			106.299	6.59912	106.299	6.59912
106.001	7.73662	7.73662			107.314	6.60069	107.314	6.60069
107.001	7.73731	7.73731			108.315	6.60425	108.315	6.60425
108.001	7.73796	7.73796			109.316	6.60418	109.316	6.60418
109.001	7.7386	7.7386			110.329	6.60604	110.329	6.60604
110.001	7.73924	7.73924			111.331	6.60561	111.331	6.60561
111.001	7.73987	7.73987			112.332	6.60935	112.332	6.60935
112.001	7.74051	7.74051			113.332	6.61182	113.332	6.61182
113.001	7.74116	7.74116			114.333	6.61605	114.333	6.61605
114.001	7.74184	7.74184			115.335	6.61507	115.335	6.61507
115.001	7.74255	7.74255			116.346	6.61754	116.346	6.61754
116.001	7.74329	7.74329			117.347	6.61755	117.347	6.61755
117.001	7.74406	7.74406			118.349	6.61729	118.349	6.61729
118.001	7.74484	7.74484			119.361	6.62148	119.361	6.62148
119.001	7.74563	7.74563			120.36	6.62405	120.36	6.62405
120.001	7.74643	7.74643			121.362	6.62459	121.362	6.62459
121.001	7.74723	7.74723			122.362	6.62628	122.362	6.62628
122.001	7.74803	7.74803			123.363	6.62706	123.363	6.62706
123.001	7.74881	7.74881			124.363	6.62638	124.363	6.62638
124.001	7.74957	7.74957			125.364	6.62715	125.364	6.62715
125.001	7.75031	7.75031			126.376	6.63303	126.376	6.63303
126.001	7.75102	7.75102			127.377	6.63202	127.377	6.63202
127.001	7.75172	7.75172			128.393	6.63543	128.393	6.63543
128.001	7.7524	7.7524			129.392	6.63728	129.392	6.63728
129.001	7.75307	7.75307			130.394	6.63923	130.394	6.63923
130.001	7.75373	7.75373			131.395	6.64302	131.395	6.64302
131.001	7.7544	7.7544			132.395	6.64208	132.395	6.64208
132.001	7.75507	7.75507			133.395	6.64307	133.395	6.64307
133.001	7.75576	7.75576			134.396	6.64409	134.396	6.64409
134.001	7.75646	7.75646			135.406	6.6463	135.406	6.6463
135.001	7.75718	7.75718			136.409	6.65083	136.409	6.65083
136.001	7.75791	7.75791			137.409	6.65144	137.409	6.65144
137.001	7.75866	7.75866			138.422	6.65284	138.422	6.65284
138.001	7.75941	7.75941			139.423	6.65201	139.423	6.65201
139.001	7.76017	7.76017			140.424	6.65051	140.424	6.65051
140.001	7.76094	7.76094			141.425	6.65464	141.425	6.65464
141.001	7.76172	7.76172			142.425	6.65793	142.425	6.65793
142.001	7.76251	7.76251			143.426	6.65817	143.426	6.65817
143.001	7.76331	7.76331			144.427	6.66016	144.427	6.66016
144.001	7.76412	7.76412			145.438	6.66297	145.438	6.66297
145.001	7.76495	7.76495			146.438	6.66531	146.438	6.66531
146.001	7.76577	7.76577			147.439	6.66881	147.439	6.66881
147.001	7.76658	7.76658			148.44	6.66888	148.44	6.66888
148.001	7.76739	7.76739			149.441	6.67147	149.441	6.67147
149.001	7.76821	7.76821			150.453	6.67124	150.453	6.67124
150.001	7.76905	7.76905			151.454	6.67431	151.454	6.67431
151.001	7.76992	7.76992			152.455	6.67676	152.455	6.67676
152.001	7.77082	7.77082			153.456	6.67638	153.456	6.67638
153.001	7.77177	7.77177			154.458	6.67756	154.458	6.67756
154.001	7.77278	7.77278			155.46	6.67701	155.46	6.67701
155.001	7.77385	7.77385			156.461	6.67775	156.461	6.67775
156.001	7.77499	7.77499			157.462	6.67927	157.462	6.67927
157.001	7.7762	7.7762			158.463	6.68124	158.463	6.68124
158.001	7.77746	7.77746			159.464	6.68289	159.464	6.68289
159.001	7.77876	7.77876			160.469	6.6855	160.469	6.6855
160.001	7.7801	7.7801			161.47	6.68718	161.47	6.68718
161.001	7.78146	7.78146			162.471	6.69099	162.471	6.69099
162.001	7.78284	7.78284			163.472	6.69292	163.472	6.69292
163.001	7.78422	7.78422			164.472	6.69569	164.472	6.69569
164.001	7.7856	7.7856			165.486	6.69358	165.486	6.69358
165.001	7.78696	7.78696			166.486	6.69389	166.486	6.69389
166.001	7.78832	7.78832			167.488	6.69642	167.488	6.69642
167.001	7.7897	7.7897			168.5	6.69865	168.5	6.69865
168.001	7.79109	7.79109			169.502	6.70174	169.502	6.70174
169.001	7.79249	7.79249			170.516	6.7018	170.516	6.7018
170.001	7.7939	7.7939			171.516	6.70373	171.516	6.70373
171.001	7.79531	7.79531			172.517	6.70659	172.517	6.70659
172.001	7.79672	7.79672			173.518	6.70797	173.518	6.70797
173.001	7.79813	7.79813			174.519	6.70943	174.519	6.70943
174.001	7.79953	7.79953			175.533	6.71292	175.533	6.71292
175.001	7.80092	7.80092			176.533	6.71353	176.533	6.71353
176.001	7.80227	7.80227			177.534	6.71426	177.534	6.71426
177.001	7.80359	7.80359			178.534	6.714	178.534	6.714
178.001	7.80488	7.80488			179.535	6.71684	179.535	6.71684
179.001	7.80617	7.80617			180.548	6.71629	180.548	6.71629
180.001	7.80746	7.80746			181.548	6.71813	181.548	6.71813
181.001	7.80878	7.80878			182.549	6.72231	182.549	6.72231
182.001	7.81015	7.81015			183.55	6.72205	183.55	6.72205
183.001	7.81158	7.81158			184.551	6.72198	184.551	6.72198
184.001	7.81308	7.81308			185.564	6.7218	185.564	6.7218
185.001	7.81467	7.81467			186.565	6.72092	186.565	6.72092
186.001	7.81636	7.81636			187.566	6.72242	187.566	6.72242
187.001	7.81814	7.81814			188.566	6.72388	188.566	6.72388
188.001	7.81998	7.81998			189.566	6.72524	189.566	6.72524
189.001	7.82188	7.82188			190.579	6.72681	190.579	6.72681
190.001	7.82383	7.82383			191.581	6.72815	191.581	6.72815
191.001	7.8258	7.8258			192.581	6.73002	192.581	6.73002
192.001	7.8278	7.8278			193.581	6.73268	193.581	6.73268
193.001	7.82979	7.82979			194.583	6.73482	194.583	6.73482
194.001	7.83178	7.83178			195.583	6.73872	195.583	6.73872
195.001	7.83374	7.83374			196.584	6.73841	196.584	6.73841
196.001	7.83569	7.83569			197.585	6.74234	197.585	6.74234
197.001	7.83761	7.83761			198.594	6.74116	198.594	6.74116
198.001	7.83954	7.83954			199.594	6.74345	199.594	6.74345
199.001	7.84148	7.84148			200.597	6.74052	200.597	6.74052
200.001	7.84342	7.84342			201.597	6.74558	201.597	6.74558
201.001	7.8454	7.8454			202.598	6.74685	202.598	6.74685
202.001	7.8474	7.8474			203.598	6.74766	203.598	6.74766
203.001	7.84944	7.84944			204.599	6.75309	204.599	6.75309
204.001	7.85154	7.85154			205.61	6.75338	205.61	6.75338
205.001	7.85369	7.85369			206.611	6.75659	206.611	6.75659
206.001	7.85591	7.85591			207.612	6.75625	207.612	6.75625
207.001	7.85821	7.85821			208.613	6.75602	208.613	6.75602
208.001	7.86056	7.86056			209.614	6.75727	209.614	6.75727
209.001	7.86295	7.86295			210.637	6.76095	210.637	6.76095
210.001	7.86537	7.86537			211.638	6.76199	211.638	6.76199
211.001	7.8678	7.8678			212.639	6.76301	212.639	6.76301
212.001	7.87023	7.87023			213.64	6.76775	213.64	6.76775
213.001	7.87266	7.87266			214.641	6.77067	214.641	6.77067
214.001	7.87505	7.87505			215.641	6.77404	215.641	6.77404
215.001	7.8774	7.8774			216.642	6.77137	216.642	6.77137
216.001	7.87971	7.87971			217.643	6.7752	217.643	6.7752
217.001	7.88198	7.88198			218.643	6.77786	218.643	6.77786
218.001	7.88423	7.88423			219.645	6.77747	219.645	6.77747
219.001	7.88647	7.88647			220.658	6.78269	220.658	6.78269
220.001	7.8887	7.8887			221.659	6.78238	221.659	6.78238
221.001	7.89095	7.89095			222.66	6.78022	222.66	6.78022
222.001	7.89321	7.89321			223.66	6.78498	223.66	6.78498
223.001	7.8955	7.8955			224.662	6.78392	224.662	6.78392
224.001	7.89784	7.89784			225.675	6.78655	225.675	6.78655
225.001	7.90022	7.90022			226.676	6.78786	226.676	6.78786
226.001	7.90265	7.90265			227.676	6.78951	227.676	6.78951
227.001	7.9051	7.9051			228.676	6.78943	228.676	6.78943
228.001	7.90759	7.90759			229.678	6.77491	229.678	6.77491
229.001	7.9101	7.9101			230.688	6.81631	230.688	6.81631
230.001	7.91264	7.91264			231.689	6.81587	231.689	6.81587
231.001	7.9152	7.9152			232.69	6.79549	232.69	6.79549
232.001	7.91779	7.91779			233.69	6.79628	233.69	6.79628
233.001	7.9204	7.9204			234.692	6.79815	234.692	6.79815
234.001	7.92303	7.92303			235.693	6.80098	235.693	6.80098
235.001	7.92569	7.92569			236.694	6.80299	236.694	6.80299
236.001	7.92837	7.92837			237.695	6.8026	237.695	6.8026
237.001	7.93109	7.93109			238.697	6.80147	238.697	6.80147
238.001	7.93384	7.93384			239.698	6.78314	239.698	6.78314
239.001	7.93661	7.93661			240.707	6.83346	240.707	6.83346
240.001	7.9394	7.9394			241.708	6.81281	241.708	6.81281
241.001	7.94222	7.94222			242.709	6.81234	242.709	6.81234
242.001	7.94505	7.94505			243.71	6.81216	243.71	6.81216
243.001	7.94789	7.94789			244.711	6.8155	244.711	6.8155
244.001	7.95074	7.95074			245.721	6.81092	245.721	6.81092
245.001	7.95359	7.95359			246.722	6.81392	246.722	6.81392
246.001	7.95645	7.95645			247.723	6.8201	247.723	6.8201
247.001	7.95929	7.95929			248.724	6.82155	248.724	6.82155
248.001	7.96213	7.96213			249.725	6.82383	249.725	6.82383
249.001	7.96498	7.96498			250.729	6.8262	250.729	6.8262
250.001	7.96786	7.96786			251.731	6.82772	251.731	6.82772
251.001	7.97075	7.97075			252.732	6.82567	252.732	6.82567
252.002	7.97369	7.97369			253.733	6.82526	253.733	6.82526
253.002	7.97667	7.97667			254.734	6.82475	254.734	6.82475
254.002	7.97971	7.97971			255.734	6.82805	255.734	6.82805
255.002	7.98281	7.98281			256.735	6.8302	256.735	6.8302
256.002	7.98599	7.98599			257.735	6.83022	257.735	6.83022
257.002	7.98922	7.98922			258.737	6.82952	258.737	6.82952
258.002	7.9925	7.9925			259.737	6.83234	259.737	6.83234
259.002	7.99584	7.99584			260.738	6.83223	260.738	6.83223
260.002	7.99921	7.99921			261.739	6.83698	261.739	6.83698
261.002	8.00262	8.00262			262.74	6.83889	262.74	6.83889
262.002	8.00605	8.00605			263.741	6.83938	263.741	6.83938
263.002	8.00951	8.00951			264.741	6.83885	264.741	6.83885
264.002	8.01298	8.01298			265.753	6.8402	265.753	6.8402
265.002	8.01645	8.01645			266.753	6.84078	266.753	6.84078
266.002	8.01996	8.01996			267.754	6.8408	267.754	6.8408
267.002	8.02352	8.02352			268.755	6.84215	268.755	6.84215
268.002	8.02712	8.02712			269.757	6.8469	269.757	6.8469
269.002	8.03075	8.03075			270.757	6.84799	270.757	6.84799
270.002	8.03439	8.03439			271.759	6.84808	271.759	6.84808
271.002	8.03804	8.03804			272.76	6.84666	272.76	6.84666
272.002	8.04167	8.04167			273.761	6.84851	273.761	6.84851
273.002	8.04528	8.04528			274.761	6.8508	274.761	6.8508
274.002	8.04884	8.04884			275.77	6.8525	275.77	6.8525
275.002	8.05235	8.05235			276.771	6.85194	276.771	6.85194
276.002	8.0558	8.0558			277.772	6.85492	277.772	6.85492
277.002	8.0592	8.0592			278.772	6.85371	278.772	6.85371
278.002	8.06257	8.06257			279.773	6.85648	279.773	6.85648
279.002	8.0659	8.0659			280.775	6.8575	280.775	6.8575
280.002	8.06922	8.06922			281.776	6.86016	281.776	6.86016
281.002	8.07252	8.07252			282.777	6.85851	282.777	6.85851
282.002	8.07583	8.07583			283.778	6.85751	283.778	6.85751
283.002	8.07914	8.07914			284.779	6.85862	284.779	6.85862
284.002	8.08247	8.08247			285.788	6.8606	285.788	6.8606
285.002	8.08583	8.08583			286.788	6.86	286.788	6.86
286.002	8.0892	8.0892			287.8	6.8611	287.8	6.8611
287.002	8.09258	8.09258			288.801	6.8639	288.801	6.8639
288.002	8.09595	8.09595			289.802	6.8632	289.802	6.8632
289.002	8.09933	8.09933			290.816	6.86625	290.816	6.86625
290.002	8.10272	8.10272			291.816	6.86886	291.816	6.86886
291.002	8.10612	8.10612			292.817	6.87096	292.817	6.87096
292.002	8.10953	8.10953			293.818	6.87142	293.818	6.87142
293.002	8.11297	8.11297			294.819	6.87308	294.819	6.87308
294.002	8.11643	8.11643			295.828	6.87165	295.828	6.87165
295.002	8.11992	8.11992			296.83	6.87402	296.83	6.87402
296.002	8.12345	8.12345			297.831	6.87509	297.831	6.87509
297.002	8.12704	8.12704			298.834	6.87498	298.834	6.87498
298.002	8.13067	8.13067			299.835	6.87435	299.835	6.87435
299.002	8.13432	8.13432			300.844	6.88169	300.844	6.88169
300.002	8.13799	8.13799			301.844	6.88051	301.844	6.88051
301.002	8.14166	8.14166			302.845	6.88102	302.845	6.88102
302.002	8.14531	8.14531			303.848	6.88027	303.848	6.88027
303.002	8.14893	8.14893			304.85	6.881	304.85	6.881
304.002	8.15252	8.15252			305.86	6.88614	305.86	6.88614
305.002	8.15605	8.15605			306.861	6.88758	306.861	6.88758
306.002	8.15951	8.15951			307.862	6.88845	307.862	6.88845
307.002	8.16294	8.16294			308.863	6.88794	308.863	6.88794
308.002	8.16633	8.16633			309.863	6.88619	309.863	6.88619
309.002	8.16969	8.16969			310.864	6.88882	310.864	6.88882
310.002	8.17303	8.17303			311.865	6.89151	311.865	6.89151
311.002	8.17635	8.17635			312.865	6.8924	312.865	6.8924
312.002	8.17966	8.17966			313.867	6.89724	313.867	6.89724
313.002	8.18296	8.18296			314.868	6.8948	314.868	6.8948
314.002	8.18625	8.18625			315.878	6.89691	315.878	6.89691
315.002	8.18955	8.18955			316.879	6.8952	316.879	6.8952
316.002	8.19283	8.19283			317.891	6.89798	317.891	6.89798
317.002	8.19606	8.19606			318.891	6.90051	318.891	6.90051
318.002	8.19926	8.19926			319.892	6.90406	319.892	6.90406
319.002	8.20245	8.20245			320.893	6.90073	320.893	6.90073
320.002	8.20562	8.20562			321.893	6.90321	321.893	6.90321
321.002	8.20882	8.20882			322.895	6.90518	322.895	6.90518
322.002	8.21204	8.21204			323.896	6.90765	323.896	6.90765
323.002	8.21532	8.21532			324.897	6.90719	324.897	6.90719
324.002	8.21865	8.21865			325.908	6.90905	325.908	6.90905
325.002	8.22207	8.22207			326.908	6.91129	326.908	6.91129
326.002	8.22558	8.22558			327.91	6.91129	327.91	6.91129
327.002	8.22916	8.22916			328.91	6.9112	328.91	6.9112
328.002	8.2328	8.2328			329.911	6.91094	329.911	6.91094
329.002	8.2365	8.2365			330.912	6.90996	330.912	6.90996
330.002	8.24024	8.24024			331.913	6.91219	331.913	6.91219
331.002	8.24401	8.24401			332.914	6.91169	332.914	6.91169
332.002	8.24781	8.24781			333.914	6.91058	333.914	6.91058
333.002	8.25161	8.25161			334.915	6.90989	334.915	6.90989
334.002	8.25542	8.25542			335.924	6.91417	335.924	6.91417
335.002	8.25921	8.25921			336.925	6.91562	336.925	6.91562
336.002	8.26299	8.26299			337.926	6.91633	337.926	6.91633
337.002	8.26678	8.26678			338.927	6.9161	338.927	6.9161
338.002	8.27058	8.27058			339.928	6.91518	339.928	6.91518
339.002	8.2744	8.2744			340.935	6.91611	340.935	6.91611
340.002	8.27822	8.27822			341.935	6.91456	341.935	6.91456
341.002	8.28206	8.28206			342.937	6.91629	342.937	6.91629
342.002	8.2859	8.2859			343.937	6.91849	343.937	6.91849
343.002	8.28976	8.28976			344.938	6.91951	344.938	6.91951
344.002	8.29363	8.29363			345.94	6.91879	345.94	6.91879
345.002	8.29751	8.29751			346.941	6.91799	346.941	6.91799
346.002	8.30141	8.30141			347.941	6.92289	347.941	6.92289
347.002	8.30534	8.30534			348.941	6.92271	348.941	6.92271
348.002	8.30931	8.30931			349.942	6.92256	349.942	6.92256
349.002	8.31329	8.31329			350.942	6.92296	350.942	6.92296
350.002	8.31728	8.31728			351.943	6.92355	351.943	6.92355
351.002	8.32127	8.32127			352.945	6.92378	352.945	6.92378
352.002	8.32524	8.32524			353.946	6.92297	353.946	6.92297
353.002	8.32919	8.32919			354.947	6.92416	354.947	6.92416
354.002	8.3331	8.3331			355.956	6.92707	355.956	6.92707
355.002	8.33697	8.33697			356.957	6.92714	356.957	6.92714
356.002	8.34078	8.34078			357.958	6.92639	357.958	6.92639
357.002	8.34453	8.34453			358.958	6.92755	358.958	6.92755
358.002	8.34824	8.34824			359.959	6.92855	359.959	6.92855
359.002	8.35192	8.35192			360.96	6.93051	360.96	6.93051
360.002	8.35558	8.35558			361.961	6.93152	361.961	6.93152
361.002	8.35922	8.35922			362.962	6.93279	362.962	6.93279
362.002	8.36288	8.36288			363.962	6.93267	363.962	6.93267
363.002	8.36655	8.36655			364.963	6.93772	364.963	6.93772
364.002	8.37025	8.37025			365.969	6.93692	365.969	6.93692
365.002	8.37399	8.37399			366.97	6.93735	366.97	6.93735
366.002	8.37778	8.37778			367.971	6.93794	367.971	6.93794
367.002	8.3816	8.3816			368.973	6.93718	368.973	6.93718
368.002	8.38543	8.38543			369.974	6.94026	369.974	6.94026
369.002	8.38929	8.38929			370.986	6.93968	370.986	6.93968
370.002	8.39317	8.39317			371.987	6.94037	371.987	6.94037
371.002	8.39706	8.39706			372.987	6.93929	372.987	6.93929
372.002	8.40096	8.40096			373.989	6.94168	373.989	6.94168
373.002	8.40487	8.40487			374.99	6.94105	374.99	6.94105
374.002	8.40879	8.40879			376.003	6.94167	376.003	6.94167
375.002	8.41271	8.41271			377.004	6.94394	377.004	6.94394
376.002	8.41664	8.41664			378.005	6.94859	378.005	6.94859
377.002	8.4206	8.4206			379.006	6.95106	379.006	6.95106
378.002	8.42459	8.42459			380.008	6.95028	380.008	6.95028
379.002	8.42859	8.42859			381.032	6.95165	381.032	6.95165
380.002	8.4326	8.4326			382.033	6.94973	382.033	6.94973
381.002	8.43661	8.43661			383.033	6.94963	383.033	6.94963
382.002	8.4406	8.4406			384.034	6.95218	384.034	6.95218
383.002	8.44457	8.44457			385.035	6.95364	385.035	6.95364
384.002	8.44851	8.44851			386.05	6.9562	386.05	6.9562
385.002	8.4524	8.4524			387.051	6.9559	387.051	6.9559
386.002	8.45625	8.45625			388.052	6.95701	388.052	6.95701
387.002	8.46012	8.46012			389.053	6.95868	389.053	6.95868
388.002	8.46399	8.46399			390.101	6.95861	390.101	6.95861
389.002	8.46785	8.46785			391.067	6.96018	391.067	6.96018
390.002	8.47169	8.47169			392.068	6.95939	392.068	6.95939
391.002	8.47547	8.47547			393.07	6.95845	393.07	6.95845
392.002	8.4792	8.4792			394.071	6.95895	394.071	6.95895
393.002	8.48285	8.48285			395.112	6.95914	395.112	6.95914
394.002	8.4864	8.4864			396.079	6.96308	396.079	6.96308
395.002	8.48984	8.48984			397.08	6.96399	397.08	6.96399
396.002	8.49369	8.49369			398.08	6.96368	398.08	6.96368
397.002	8.50003	8.50003			399.081	6.96536	399.081	6.96536
398.002	8.50817	8.50817			400.122	6.9657	400.122	6.9657
399.002	8.51705	8.51705			401.082	6.96875	401.082	6.96875
400.002	8.52562	8.52562			402.083	6.97046	402.083	6.97046
401.002	8.53282	8.53282			403.084	6.96965	403.084	6.96965
402.002	8.5376	8.5376			404.085	6.97227	404.085	6.97227
403.002	8.53891	8.53891			405.109	6.97138	405.109	6.97138
404.002	8.53568	8.53568			406.096	6.96889	406.096	6.96889
405.002	8.52687	8.52687			407.098	6.97143	407.098	6.97143
406.002	8.51101	8.51101			408.112	6.97153	408.112	6.97153
407.002	8.48618	8.48618			409.113	6.97453	409.113	6.97453
408.002	8.45404	8.45404			410.134	6.9758	410.134	6.9758
409.002	8.41664	8.41664			411.127	6.97281	411.127	6.97281
410.002	8.37604	8.37604			412.128	6.97554	412.128	6.97554
411.002	8.33431	8.33431			413.129	6.97898	413.129	6.97898
412.002	8.29349	8.29349			414.129	6.98177	414.129	6.98177
413.002	8.25567	8.25567			415.144	6.98094	415.144	6.98094
414.002	8.22288	8.22288			416.145	6.97928	416.145	6.97928
415.002	8.19721	8.19721			417.145	6.98102	417.145	6.98102
416.002	8.18011	8.18011			418.146	6.98829	418.146	6.98829
417.002	8.16926	8.16926			419.147	6.99033	419.147	6.99033
418.002	8.16333	8.16333			420.162	6.98999	420.162	6.98999
419.002	8.16144	8.16144			421.163	6.99024	421.163	6.99024
420.003	8.16266	8.16266			422.164	6.99079	422.164	6.99079
421.003	8.16611	8.16611			423.166	6.99157	423.166	6.99157
422.003	8.17087	8.17087			424.167	6.99309	424.167	6.99309
423.003	8.17604	8.17604			425.179	6.99415	425.179	6.99415
424.003	8.18071	8.18071			426.179	6.99412	426.179	6.99412
425.003	8.18398	8.18398			427.18	6.99327	427.18	6.99327
426.003	8.18535	8.18535			428.181	6.99287	428.181	6.99287
427.003	8.18676	8.18676			429.182	6.9947	429.182	6.9947
428.003	8.18855	8.18855			430.19	6.99468	430.19	6.99468
429.003	8.19065	8.19065			431.191	6.99322	431.191	6.99322
430.003	8.19299	8.19299			432.192	6.99384	432.192	6.99384
431.003	8.19552	8.19552			433.193	6.99117	433.193	6.99117
432.003	8.19817	8.19817			434.193	6.99167	434.193	6.99167
433.003	8.20086	8.20086			435.204	6.99103	435.204	6.99103
434.003	8.20354	8.20354			436.205	6.99311	436.205	6.99311
435.003	8.20614	8.20614			437.206	6.9935	437.206	6.9935
436.003	8.20872	8.20872			438.219	6.99263	438.219	6.99263
437.003	8.21207	8.21207			439.22	6.99703	439.22	6.99703
438.003	8.21604	8.21604			440.235	6.99894	440.235	6.99894
439.003	8.22032	8.22032			441.236	6.99616	441.236	6.99616
440.003	8.2246	8.2246			442.236	6.99883	442.236	6.99883
441.003	8.22856	8.22856			443.237	7.00031	443.237	7.00031
442.003	8.23189	8.23189			444.237	6.99784	444.237	6.99784
443.003	8.23428	8.23428			445.253	6.99858	445.253	6.99858
444.003	8.2354	8.2354			446.255	6.99906	446.255	6.99906
445.003	8.23495	8.23495			447.255	7.00211	447.255	7.00211
446.003	8.23296	8.23296			448.256	7.00122	448.256	7.00122
447.003	8.23166	8.23166			449.257	7.00428	449.257	7.00428
448.003	8.23084	8.23084			450.269	7.0033	450.269	7.0033
449.003	8.22972	8.22972			451.27	7.00445	451.27	7.00445
450.003	8.2275	8.2275			452.271	7.00178	452.271	7.00178
451.003	8.2234	8.2234			453.272	7.00529	453.272	7.00529
452.003	8.21663	8.21663			454.273	7.00368	454.273	7.00368
453.003	8.20638	8.20638			455.282	7.00299	455.282	7.00299
454.003	8.19189	8.19189			456.283	7.00561	456.283	7.00561
455.003	8.17234	8.17234			457.285	7.0078	457.285	7.0078
456.003	8.14663	8.14663			458.286	7.00644	458.286	7.00644
457.003	8.11212	8.11212			459.287	7.00564	459.287	7.00564
458.003	8.07004	8.07004			460.3	7.0077	460.3	7.0077
459.003	8.02243	8.02243			461.301	7.00925	461.301	7.00925
460.003	7.97132	7.97132			462.302	7.00939	462.302	7.00939
461.003	7.91876	7.91876			463.303	7.00814	463.303	7.00814
462.003	7.86677	7.86677			464.304	7.01018	464.304	7.01018
463.003	7.8174	7.8174			465.317	7.01094	465.317	7.01094
464.003	7.77267	7.77267			466.318	7.01279	466.318	7.01279
465.003	7.73462	7.73462			467.319	7.01172	467.319	7.01172
466.003	7.70487	7.70487			468.332	7.00859	468.332	7.00859
467.003	7.68068	7.68068			469.333	7.00928	469.333	7.00928
468.003	7.6607	7.6607			470.345	7.01252	470.345	7.01252
469.003	7.64439	7.64439			471.345	7.01352	471.345	7.01352
470.003	7.63119	7.63119			472.346	7.01376	472.346	7.01376
471.003	7.62056	7.62056			473.347	7.00917	473.347	7.00917
472.003	7.61195	7.61195			474.347	7.01223	474.347	7.01223
473.003	7.60482	7.60482			475.348	7.01653	475.348	7.01653
474.003	7.59862	7.59862			476.348	7.01839	476.348	7.01839
475.003	7.59281	7.59281			477.348	7.01954	477.348	7.01954
476.003	7.58704	7.58704			478.349	7.01884	478.349	7.01884
477.003	7.5829	7.5829			479.35	7.0204	479.35	7.0204
478.003	7.58063	7.58063			480.35	7.01693	480.35	7.01693
479.003	7.57997	7.57997			481.351	7.0197	481.351	7.0197
480.003	7.58062	7.58062			482.352	7.02139	482.352	7.02139
481.003	7.58229	7.58229			483.353	7.02044	483.353	7.02044
482.003	7.58471	7.58471			484.354	7.02085	484.354	7.02085
483.003	7.5876	7.5876			485.359	7.02269	485.359	7.02269
484.003	7.59065	7.59065			486.36	7.0217	486.36	7.0217
485.003	7.5936	7.5936			487.36	7.0218	487.36	7.0218
486.003	7.59623	7.59623			488.362	7.02227	488.362	7.02227
487.003	7.59928	7.59928			489.363	7.01795	489.363	7.01795
488.003	7.6029	7.6029			490.376	7.01594	490.376	7.01594
489.003	7.607	7.607			491.377	7.01809	491.377	7.01809
490.003	7.61147	7.61147			492.378	7.01911	492.378	7.01911
491.003	7.61621	7.61621			493.379	7.02092	493.379	7.02092
492.003	7.62111	7.62111			494.381	7.01995	494.381	7.01995
493.003	7.62607	7.62607			495.396	7.01795	495.396	7.01795
494.003	7.63099	7.63099			496.396	7.01796	496.396	7.01796
495.003	7.63575	7.63575			497.398	7.01591	497.398	7.01591
496.003	7.64029	7.64029			498.406	7.01651	498.406	7.01651
497.003	7.64485	7.64485			499.407	7.01635	499.407	7.01635
498.003	7.6495	7.6495			500.407	7.01679	500.407	7.01679
499.003	7.65421	7.65421			501.408	7.01845	501.408	7.01845
500.003	7.65895	7.65895			502.408	7.01453	502.408	7.01453
501.003	7.66367	7.66367			503.409	7.01669	503.409	7.01669
502.003	7.66836	7.66836			504.41	7.01848	504.41	7.01848
503.003	7.67297	7.67297			505.411	7.01749	505.411	7.01749
504.003	7.67747	7.67747			506.413	7.01638	506.413	7.01638
505.003	7.68183	7.68183			507.413	7.01793	507.413	7.01793
506.003	7.68603	7.68603			508.414	7.01914	508.414	7.01914
507.003	7.6901	7.6901			509.415	7.01664	509.415	7.01664
508.003	7.69407	7.69407			510.423	7.01526	510.423	7.01526
509.003	7.69795	7.69795			511.424	7.01826	511.424	7.01826
510.003	7.70175	7.70175			512.425	7.01806	512.425	7.01806
511.003	7.70546	7.70546			513.426	7.01775	513.426	7.01775
512.003	7.7091	7.7091			514.427	7.01659	514.427	7.01659
513.003	7.71267	7.71267			515.438	7.01685	515.438	7.01685
514.003	7.71617	7.71617			516.439	7.01416	516.439	7.01416
515.003	7.71961	7.71961			517.441	7.01314	517.441	7.01314
516.003	7.723	7.723			518.441	7.01279	518.441	7.01279
517.003	7.7263	7.7263			519.442	7.01178	519.442	7.01178
518.003	7.7295	7.7295			520.454	7.01499	520.454	7.01499
519.003	7.73263	7.73263			521.455	7.01577	521.455	7.01577
520.003	7.73568	7.73568			522.456	7.01665	522.456	7.01665
521.003	7.73868	7.73868			523.457	7.01859	523.457	7.01859
522.003	7.74163	7.74163			524.457	7.01551	524.457	7.01551
523.003	7.74455	7.74455			525.471	7.01689	525.471	7.01689
524.003	7.74744	7.74744			526.472	7.01743	526.472	7.01743
525.003	7.75032	7.75032			527.472	7.01674	527.472	7.01674
526.003	7.75319	7.75319			528.474	7.01569	528.474	7.01569
527.003	7.75604	7.75604			529.475	7.01564	529.475	7.01564
528.003	7.75886	7.75886			530.485	7.01367	530.485	7.01367
529.003	7.76164	7.76164			531.486	7.01289	531.486	7.01289
530.003	7.76439	7.76439			532.487	7.01336	532.487	7.01336
531.003	7.76711	7.76711			533.487	7.01439	533.487	7.01439
532.003	7.7698	7.7698			534.488	7.01379	534.488	7.01379
533.003	7.77247	7.77247			535.489	7.01622	535.489	7.01622
534.003	7.77512	7.77512			536.49	7.01469	536.49	7.01469
535.003	7.77774	7.77774			537.491	7.01259	537.491	7.01259
536.003	7.78034	7.78034			538.492	7.01354	538.492	7.01354
537.003	7.78291	7.78291			539.493	7.01249	539.493	7.01249
538.003	7.78542	7.78542			540.5	7.01041	540.5	7.01041
539.003	7.7879	7.7879			541.501	7.01165	541.501	7.01165
540.003	7.79036	7.79036			542.502	7.01093	542.502	7.01093
541.003	7.7928	7.7928			543.502	7.01029	543.502	7.01029
542.003	7.79523	7.79523			544.503	7.00955	544.503	7.00955
543.003	7.79767	7.79767			545.518	7.0092	545.518	7.0092
544.003	7.80012	7.80012			546.519	7.00961	546.519	7.00961
545.003	7.8026	7.8026			547.52	7.0061	547.52	7.0061
546.003	7.80513	7.80513			548.521	7.00753	548.521	7.00753
547.003	7.80829	7.80829			549.521	7.00724	549.521	7.00724
548.003	7.8121	7.8121			550.536	7.0062	550.536	7.0062
549.003	7.81626	7.81626			551.537	7.00411	551.537	7.00411
550.003	7.82048	7.82048			552.538	7.00491	552.538	7.00491
551.003	7.82444	7.82444			553.539	7.00478	553.539	7.00478
552.003	7.82784	7.82784			554.54	6.99984	554.54	6.99984
553.003	7.83039	7.83039			555.552	7.00126	555.552	7.00126
554.003	7.83177	7.83177			556.553	6.99896	556.553	6.99896
555.003	7.83169	7.83169			557.554	7.00012	557.554	7.00012
556.003	7.82984	7.82984			558.562	7.00051	558.562	7.00051
557.003	7.82609	7.82609			559.563	7.00107	559.563	7.00107
558.003	7.82068	7.82068			560.579	7.0003	560.579	7.0003
559.003	7.81392	7.81392			561.58	6.99975	561.58	6.99975
560.003	7.80612	7.80612			562.581	6.99876	562.581	6.99876
561.003	7.79756	7.79756			563.582	6.99737	563.582	6.99737
562.003	7.78855	7.78855			564.583	6.99716	564.583	6.99716
563.003	7.77939	7.77939			565.594	6.99602	565.594	6.99602
564.003	7.77039	7.77039			566.594	6.99726	566.594	6.99726
565.003	7.76184	7.76184			567.595	6.99708	567.595	6.99708
566.003	7.75402	7.75402			568.596	6.99581	568.596	6.99581
567.003	7.74601	7.74601			569.598	6.99538	569.598	6.99538
568.003	7.73741	7.73741			570.61	6.99481	570.61	6.99481
569.003	7.72849	7.72849			571.611	6.9931	571.611	6.9931
570.003	7.71952	7.71952			572.612	6.99215	572.612	6.99215
571.003	7.71078	7.71078			573.612	6.9933	573.612	6.9933
572.003	7.70253	7.70253			574.613	6.99256	574.613	6.99256
573.003	7.69505	7.69505			575.626	6.98842	575.626	6.98842
574.003	7.68862	7.68862			576.627	6.98812	576.627	6.98812
575.003	7.6835	7.6835			577.628	6.99102	577.628	6.99102
576.003	7.67997	7.67997			578.629	6.98907	578.629	6.98907
577.003	7.67836	7.67836			579.63	6.98948	579.63	6.98948
578.003	7.67848	7.67848			580.641	6.98963	580.641	6.98963
579.003	7.67996	7.67996			581.642	6.98864	581.642	6.98864
580.003	7.68243	7.68243			582.642	6.98711	582.642	6.98711
581.003	7.68552	7.68552			583.643	6.98484	583.643	6.98484
582.003	7.68885	7.68885			584.644	6.98391	584.644	6.98391
583.003	7.69206	7.69206			585.656	6.98481	585.656	6.98481
584.003	7.69476	7.69476			586.657	6.98381	586.657	6.98381
585.003	7.6966	7.6966			587.659	6.98584	587.659	6.98584
586.003	7.69719	7.69719			588.673	6.98359	588.673	6.98359
587.004	7.69659	7.69659			589.673	6.98441	589.673	6.98441
588.004	7.69514	7.69514			590.688	6.98382	590.688	6.98382
589.004	7.69309	7.69309			591.689	6.98263	591.689	6.98263
590.004	7.69065	7.69065			592.69	6.9806	592.69	6.9806
591.004	7.68805	7.68805			593.69	6.9817	593.69	6.9817
592.004	7.68553	7.68553			594.691	6.98004	594.691	6.98004
593.004	7.68331	7.68331			595.704	6.97913	595.704	6.97913
594.004	7.68163	7.68163			596.705	6.98033	596.705	6.98033
595.004	7.68071	7.68071			597.706	6.97883	597.706	6.97883
596.004	7.68078	7.68078			598.707	6.97818	598.707	6.97818
597.004	7.68184	7.68184			599.708	6.97699	599.708	6.97699
598.004	7.68367	7.68367			600.719	6.97783	600.719	6.97783
599.004	7.68612	7.68612			601.72	6.97679	601.72	6.97679
600.004	7.68905	7.68905			602.721	6.97773	602.721	6.97773
601.004	7.6923	7.6923			603.722	6.97814	603.722	6.97814
602.004	7.69572	7.69572			604.722	6.97509	604.722	6.97509
603.004	7.69917	7.69917			605.736	6.97439	605.736	6.97439
604.004	7.7025	7.7025			606.736	6.97532	606.736	6.97532
605.004	7.70555	7.70555			607.737	6.97447	607.737	6.97447
606.004	7.70818	7.70818			608.738	6.97243	608.738	6.97243
607.004	7.71065	7.71065			609.739	6.97198	609.739	6.97198
608.004	7.71322	7.71322			610.751	6.96921	610.751	6.96921
609.004	7.71581	7.71581			611.752	6.9709	611.752	6.9709
610.004	7.71835	7.71835			612.754	6.96785	612.754	6.96785
611.004	7.72078	7.72078			613.755	6.96899	613.755	6.96899
612.004	7.72303	7.72303			614.756	6.96822	614.756	6.96822
613.004	7.72503	7.72503			615.766	6.96692	615.766	6.96692
614.004	7.72673	7.72673			616.766	6.96671	616.766	6.96671
615.004	7.72804	7.72804			617.767	6.96502	617.767	6.96502
616.004	7.7289	7.7289			618.768	6.96353	618.768	6.96353
617.004	7.72934	7.72934			619.769	6.96273	619.769	6.96273
618.004	7.72941	7.72941			620.781	6.96433	620.781	6.96433
619.004	7.72914	7.72914			621.782	6.96202	621.782	6.96202
620.004	7.72858	7.72858			622.783	6.9627	622.783	6.9627
621.004	7.72776	7.72776			623.783	6.96202	623.783	6.96202
622.004	7.72671	7.72671			624.784	6.9616	624.784	6.9616
623.004	7.72545	7.72545			625.798	6.96008	625.798	6.96008
624.004	7.72404	7.72404			626.799	6.95945	626.799	6.95945
625.004	7.72249	7.72249			627.8	6.96046	627.8	6.96046
626.004	7.72084	7.72084			628.801	6.95978	628.801	6.95978
627.004	7.71881	7.71881			629.802	6.95978	629.802	6.95978
628.004	7.71623	7.71623			630.813	6.95904	630.813	6.95904
629.004	7.71327	7.71327			631.813	6.95817	631.813	6.95817
630.004	7.71007	7.71007			632.815	6.95958	632.815	6.95958
631.004	7.7068	7.7068			633.815	6.95562	633.815	6.95562
632.004	7.70363	7.70363			634.816	6.95548	634.816	6.95548
633.004	7.70071	7.70071			635.829	6.95446	635.829	6.95446
634.004	7.69821	7.69821			636.83	6.95394	636.83	6.95394
635.004	7.69628	7.69628			637.831	6.95261	637.831	6.95261
636.004	7.6951	7.6951			638.831	6.95354	638.831	6.95354
637.004	7.69473	7.69473			639.833	6.95339	639.833	6.95339
638.004	7.69506	7.69506			640.845	6.95148	640.845	6.95148
639.004	7.69594	7.69594			641.846	6.95079	641.846	6.95079
640.004	7.69723	7.69723			642.847	6.95043	642.847	6.95043
641.004	7.69879	7.69879			643.847	6.95061	643.847	6.95061
642.004	7.70048	7.70048			644.847	6.94915	644.847	6.94915
643.004	7.70217	7.70217			645.848	6.94687	645.848	6.94687
644.004	7.70369	7.70369			646.849	6.94741	646.849	6.94741
645.004	7.70493	7.70493			647.86	6.9453	647.86	6.9453
646.004	7.70573	7.70573			648.861	6.94585	648.861	6.94585
647.004	7.70615	7.70615			649.862	6.94663	649.862	6.94663
648.004	7.70639	7.70639			650.876	6.94528	650.876	6.94528
649.004	7.70646	7.70646			651.877	6.94402	651.877	6.94402
650.004	7.70642	7.70642			652.879	6.94338	652.879	6.94338
651.004	7.70628	7.70628			653.879	6.94351	653.879	6.94351
652.004	7.7061	7.7061			654.88	6.94243	654.88	6.94243
653.004	7.7059	7.7059			655.89	6.94296	655.89	6.94296
654.004	7.70571	7.70571			656.891	6.94013	656.891	6.94013
655.004	7.70558	7.70558			657.892	6.93911	657.892	6.93911
656.004	7.70553	7.70553			658.893	6.94112	658.893	6.94112
657.004	7.70554	7.70554			659.894	6.94011	659.894	6.94011
658.004	7.70554	7.70554			660.896	6.93914	660.896	6.93914
659.004	7.70555	7.70555			661.896	6.93846	661.896	6.93846
660.004	7.70556	7.70556			662.897	6.93815	662.897	6.93815
661.004	7.70559	7.70559			663.899	6.93756	663.899	6.93756
662.004	7.70562	7.70562			664.899	6.93598	664.899	6.93598
663.004	7.70567	7.70567			665.909	6.93516	665.909	6.93516
664.004	7.70574	7.70574			666.91	6.93507	666.91	6.93507
665.004	7.70584	7.70584			667.91	6.93462	667.91	6.93462
666.004	7.70597	7.70597			668.911	6.93576	668.911	6.93576
667.004	7.70615	7.70615			669.912	6.9336	669.912	6.9336
668.004	7.70639	7.70639			670.923	6.93227	670.923	6.93227
669.004	7.70668	7.70668			671.923	6.93282	671.923	6.93282
670.004	7.70699	7.70699			672.924	6.93359	672.924	6.93359
671.004	7.70732	7.70732			673.924	6.93234	673.924	6.93234
672.004	7.70763	7.70763			674.925	6.93015	674.925	6.93015
673.004	7.70792	7.70792			675.937	6.92961	675.937	6.92961
674.004	7.70816	7.70816			676.938	6.9309	676.938	6.9309
675.004	7.70834	7.70834			677.938	6.92922	677.938	6.92922
676.004	7.70844	7.70844			678.939	6.93013	678.939	6.93013
677.004	7.70835	7.70835			679.94	6.92738	679.94	6.92738
678.004	7.70801	7.70801			680.953	6.92899	680.953	6.92899
679.004	7.70751	7.70751			681.954	6.92792	681.954	6.92792
680.004	7.70693	7.70693			682.955	6.92783	682.955	6.92783
681.004	7.70636	7.70636			683.956	6.92715	683.956	6.92715
682.004	7.70588	7.70588			684.956	6.92494	684.956	6.92494
683.004	7.70557	7.70557			685.956	6.92777	685.956	6.92777
684.004	7.70552	7.70552			686.957	6.92727	686.957	6.92727
685.004	7.70583	7.70583			687.958	6.92546	687.958	6.92546
686.004	7.70656	7.70656			688.959	6.92693	688.959	6.92693
687.004	7.70783	7.70783			689.96	6.92541	689.96	6.92541
688.004	7.70965	7.70965			690.97	6.92407	690.97	6.92407
689.004	7.71188	7.71188			691.97	6.92364	691.97	6.92364
690.004	7.71442	7.71442			692.971	6.9242	692.971	6.9242
691.004	7.71713	7.71713			693.972	6.92306	693.972	6.92306
692.004	7.71991	7.71991			694.973	6.92233	694.973	6.92233
693.004	7.72261	7.72261			695.984	6.92262	695.984	6.92262
694.004	7.72514	7.72514			696.985	6.92266	696.985	6.92266
695.004	7.72736	7.72736			697.986	6.92201	697.986	6.92201
696.004	7.72915	7.72915			698.986	6.92157	698.986	6.92157
697.004	7.73053	7.73053			699.986	6.92129	699.986	6.92129
698.004	7.73169	7.73169			701.002	6.92078	701.002	6.92078
699.004	7.73266	7.73266			702.003	6.9202	702.003	6.9202
700.004	7.73346	7.73346			703.004	6.91641	703.004	6.91641
701.004	7.7341	7.7341			704.005	6.92001	704.005	6.92001
702.004	7.73462	7.73462			705.005	6.91799	705.005	6.91799
703.004	7.73503	7.73503			706.02	6.9188	706.02	6.9188
704.004	7.73535	7.73535			707.021	6.91731	707.021	6.91731
705.004	7.73561	7.73561			708.033	6.91573	708.033	6.91573
706.004	7.73582	7.73582			709.035	6.91376	709.035	6.91376
707.004	7.73597	7.73597			710.036	6.91338	710.036	6.91338
708.004	7.736	7.736			711.049	6.91328	711.049	6.91328
709.004	7.73591	7.73591			712.05	6.91573	712.05	6.91573
710.004	7.73572	7.73572			713.051	6.91318	713.051	6.91318
711.004	7.73545	7.73545			714.052	6.91373	714.052	6.91373
712.004	7.73512	7.73512			715.053	6.91189	715.053	6.91189
713.004	7.73472	7.73472			716.063	6.91231	716.063	6.91231
714.004	7.73428	7.73428			717.063	6.9106	717.063	6.9106
715.004	7.73382	7.73382			718.064	6.91073	718.064	6.91073
716.004	7.73334	7.73334			719.065	6.91106	719.065	6.91106
717.004	7.7328	7.7328			720.066	6.90978	720.066	6.90978
718.004	7.73212	7.73212			721.067	6.90943	721.067	6.90943
719.004	7.73133	7.73133			722.068	6.91088	722.068	6.91088
720.004	7.73047	7.73047			723.069	6.90964	723.069	6.90964
721.004	7.72959	7.72959			724.07	6.90799	724.07	6.90799
722.004	7.72872	7.72872			725.07	6.90967	725.07	6.90967
723.004	7.72791	7.72791			726.079	6.90849	726.079	6.90849
724.004	7.72721	7.72721			727.08	6.90755	727.08	6.90755
725.004	7.72664	7.72664			728.081	6.9086	728.081	6.9086
726.004	7.72626	7.72626			729.082	6.90872	729.082	6.90872
727.004	7.72609	7.72609			730.082	6.9069	730.082	6.9069
728.004	7.72611	7.72611			731.095	6.90704	731.095	6.90704
729.004	7.72629	7.72629			732.095	6.90339	732.095	6.90339
730.004	7.72658	7.72658			733.096	6.90332	733.096	6.90332
731.004	7.72695	7.72695			734.097	6.903	734.097	6.903
732.004	7.72736	7.72736			735.098	6.90365	735.098	6.90365
733.004	7.72778	7.72778			736.111	6.90455	736.111	6.90455
734.004	7.72817	7.72817			737.111	6.90378	737.111	6.90378
735.004	7.72848	7.72848			738.124	6.90234	738.124	6.90234
736.004	7.72869	7.72869			739.125	6.90405	739.125	6.90405
737.004	7.72875	7.72875			740.126	6.90047	740.126	6.90047
738.004	7.72867	7.72867			741.142	6.90309	741.142	6.90309
739.004	7.72848	7.72848			742.143	6.90218	742.143	6.90218
740.004	7.72823	7.72823			743.144	6.90101	743.144	6.90101
741.004	7.72798	7.72798			744.144	6.90187	744.144	6.90187
742.004	7.72776	7.72776			745.145	6.90157	745.145	6.90157
743.004	7.72763	7.72763			746.156	6.89883	746.156	6.89883
744.004	7.72763	7.72763			747.157	6.8998	747.157	6.8998
745.004	7.72781	7.72781			748.158	6.90115	748.158	6.90115
746.004	7.72821	7.72821			749.159	6.89809	749.159	6.89809
747.004	7.72886	7.72886			750.16	6.89834	750.16	6.89834
748.004	7.7297	7.7297			751.173	6.89962	751.173	6.89962
749.004	7.73071	7.73071			752.174	6.89637	752.174	6.89637
750.004	7.73186	7.73186			753.175	6.89722	753.175	6.89722
751.004	7.73312	7.73312			754.176	6.89619	754.176	6.89619
752.004	7.73449	7.73449			755.177	6.89674	755.177	6.89674
753.004	7.73592	7.73592			756.188	6.89646	756.188	6.89646
754.004	7.73741	7.73741			757.189	6.89454	757.189	6.89454
755.005	7.73894	7.73894			758.19	6.89673	758.19	6.89673
756.005	7.74046	7.74046			759.19	6.89803	759.19	6.89803
757.005	7.74202	7.74202			760.191	6.89458	760.191	6.89458
758.005	7.74369	7.74369			761.204	6.89677	761.204	6.89677
759.005	7.74546	7.74546			762.205	6.89383	762.205	6.89383
760.005	7.7473	7.7473			763.207	6.89544	763.207	6.89544
761.005	7.74918	7.74918			764.207	6.89196	764.207	6.89196
762.005	7.75108	7.75108			765.209	6.89318	765.209	6.89318
763.005	7.75297	7.75297			766.221	6.8932	766.221	6.8932
764.005	7.75482	7.75482			767.222	6.89294	767.222	6.89294
765.005	7.7566	7.7566			768.223	6.89214	768.223	6.89214
766.005	7.75829	7.75829			769.224	6.88901	769.224	6.88901
767.005	7.75996	7.75996			770.225	6.89095	770.225	6.89095
768.005	7.76182	7.76182			771.234	6.89102	771.234	6.89102
769.005	7.76381	7.76381			772.235	6.89198	772.235	6.89198
770.005	7.76582	7.76582			773.236	6.89246	773.236	6.89246
771.005	7.76775	7.76775			774.237	6.89008	774.237	6.89008
772.005	7.76953	7.76953			775.237	6.89158	775.237	6.89158
773.005	7.77104	7.77104			776.252	6.88902	776.252	6.88902
774.005	7.77219	7.77219			777.252	6.89009	777.252	6.89009
775.005	7.77289	7.77289			778.253	6.88957	778.253	6.88957
776.005	7.77304	7.77304			779.254	6.88934	779.254	6.88934
777.005	7.77252	7.77252			780.255	6.8892	780.255	6.8892
778.005	7.77126	7.77126			781.267	6.88805	781.267	6.88805
779.005	7.7694	7.7694			782.267	6.88786	782.267	6.88786
780.005	7.76708	7.76708			783.268	6.88682	783.268	6.88682
781.005	7.76444	7.76444			784.269	6.88653	784.269	6.88653
782.005	7.76165	7.76165			785.314	6.88557	785.314	6.88557
783.005	7.75883	7.75883			786.27	6.88368	786.27	6.88368
784.005	7.75614	7.75614			787.27	6.88402	787.27	6.88402
785.005	7.75372	7.75372			788.271	6.88182	788.271	6.88182
786.005	7.75173	7.75173			789.272	6.88589	789.272	6.88589
787.005	7.7502	7.7502			790.314	6.88234	790.314	6.88234
788.005	7.74888	7.74888			791.282	6.88195	791.282	6.88195
789.005	7.74772	7.74772			792.282	6.88302	792.282	6.88302
790.005	7.7467	7.7467			793.283	6.87988	793.283	6.87988
791.005	7.7458	7.7458			794.283	6.88409	794.283	6.88409
792.005	7.74502	7.74502			795.329	6.88192	795.329	6.88192
793.005	7.74432	7.74432			796.302	6.88065	796.302	6.88065
794.005	7.74371	7.74371			797.303	6.88054	797.303	6.88054
795.005	7.74315	7.74315			798.312	6.8803	798.312	6.8803
796.005	7.74263	7.74263			799.313	6.88065	799.313	6.88065
797.005	7.74217	7.74217			800.349	6.87986	800.349	6.87986
798.005	7.74183	7.74183			801.315	6.87908	801.315	6.87908
799.005	7.7416	7.7416			802.316	6.87931	802.316	6.87931
800.005	7.74147	7.74147			803.317	6.87912	803.317	6.87912
801.005	7.7414	7.7414			804.318	6.87926	804.318	6.87926
802.005	7.74139	7.74139			805.34	6.87955	805.34	6.87955
803.005	7.74139	7.74139			806.33	6.878	806.33	6.878
804.005	7.74141	7.74141			807.331	6.87834	807.331	6.87834
805.005	7.7414	7.7414			808.332	6.87746	808.332	6.87746
806.005	7.74135	7.74135			809.333	6.8791	809.333	6.8791
807.005	7.74122	7.74122			810.346	6.87652	810.346	6.87652
808.005	7.74093	7.74093			811.346	6.87817	811.346	6.87817
809.005	7.74051	7.74051			812.348	6.87801	812.348	6.87801
810.005	7.74005	7.74005			813.349	6.87784	813.349	6.87784
811.005	7.73961	7.73961			814.35	6.87551	814.35	6.87551
812.005	7.73925	7.73925			815.359	6.87642	815.359	6.87642
813.005	7.73905	7.73905			816.36	6.87453	816.36	6.87453
814.005	7.73907	7.73907			817.361	6.8756	817.361	6.8756
815.005	7.73937	7.73937			818.362	6.87521	818.362	6.87521
816.005	7.74002	7.74002			819.362	6.87406	819.362	6.87406
817.005	7.7411	7.7411			820.363	6.87542	820.363	6.87542
818.005	7.74265	7.74265			821.364	6.87332	821.364	6.87332
819.005	7.74457	7.74457			822.364	6.87529	822.364	6.87529
820.005	7.74679	7.74679			823.365	6.87235	823.365	6.87235
821.005	7.74921	7.74921			824.366	6.87291	824.366	6.87291
822.005	7.75175	7.75175			825.376	6.87277	825.376	6.87277
823.005	7.75433	7.75433			826.376	6.87253	826.376	6.87253
824.005	7.75684	7.75684			827.377	6.87177	827.377	6.87177
825.005	7.75921	7.75921			828.39	6.8705	828.39	6.8705
826.005	7.76134	7.76134			829.391	6.87046	829.391	6.87046
827.005	7.76323	7.76323			830.392	6.86915	830.392	6.86915
828.005	7.76514	7.76514			831.392	6.86956	831.392	6.86956
829.005	7.76709	7.76709			832.393	6.86958	832.393	6.86958
830.005	7.76902	7.76902			833.394	6.86862	833.394	6.86862
831.005	7.77086	7.77086			834.395	6.86826	834.395	6.86826
832.005	7.77257	7.77257			835.408	6.86744	835.408	6.86744
833.005	7.77409	7.77409			836.409	6.86732	836.409	6.86732
834.005	7.77537	7.77537			837.409	6.86794	837.409	6.86794
835.005	7.77635	7.77635			838.41	6.86663	838.41	6.86663
836.005	7.77697	7.77697			839.41	6.86584	839.41	6.86584
837.005	7.77714	7.77714			840.423	6.86678	840.423	6.86678
838.005	7.77663	7.77663			841.424	6.86682	841.424	6.86682
839.005	7.77555	7.77555			842.425	6.86631	842.425	6.86631
840.005	7.77408	7.77408			843.426	6.86553	843.426	6.86553
841.005	7.77239	7.77239			844.427	6.86401	844.427	6.86401
842.005	7.77065	7.77065			845.437	6.86403	845.437	6.86403
843.005	7.76902	7.76902			846.438	6.86597	846.438	6.86597
844.005	7.76769	7.76769			847.439	6.86587	847.439	6.86587
845.005	7.76681	7.76681			848.439	6.86393	848.439	6.86393
846.005	7.76656	7.76656			849.44	6.86379	849.44	6.86379
847.005	7.76712	7.76712			850.453	6.86289	850.453	6.86289
848.005	7.76857	7.76857			851.454	6.86274	851.454	6.86274
849.005	7.77074	7.77074			852.455	6.86275	852.455	6.86275
850.005	7.7734	7.7734			853.455	6.86259	853.455	6.86259
851.005	7.77634	7.77634			854.456	6.86276	854.456	6.86276
852.005	7.77936	7.77936			855.472	6.86313	855.472	6.86313
853.005	7.78223	7.78223			856.472	6.86222	856.472	6.86222
854.005	7.78475	7.78475			857.473	6.86194	857.473	6.86194
855.005	7.7867	7.7867			858.487	6.86185	858.487	6.86185
856.005	7.78787	7.78787			859.488	6.86218	859.488	6.86218
857.005	7.78807	7.78807			860.504	6.85877	860.504	6.85877
858.005	7.7874	7.7874			861.505	6.85971	861.505	6.85971
859.005	7.78604	7.78604			862.506	6.85966	862.506	6.85966
860.005	7.78414	7.78414			863.506	6.85993	863.506	6.85993
861.005	7.78187	7.78187			864.507	6.85813	864.507	6.85813
862.005	7.77938	7.77938			865.52	6.85951	865.52	6.85951
863.005	7.77684	7.77684			866.52	6.85957	866.52	6.85957
864.005	7.7744	7.7744			867.521	6.85779	867.521	6.85779
865.005	7.77221	7.77221			868.522	6.85757	868.522	6.85757
866.005	7.77045	7.77045			869.523	6.85751	869.523	6.85751
867.005	7.7692	7.7692			870.533	6.85589	870.533	6.85589
868.005	7.76813	7.76813			871.533	6.85882	871.533	6.85882
869.005	7.76717	7.76717			872.534	6.85754	872.534	6.85754
870.005	7.76634	7.76634			873.535	6.85749	873.535	6.85749
871.005	7.76563	7.76563			874.535	6.85743	874.535	6.85743
872.005	7.76508	7.76508			875.547	6.85691	875.547	6.85691
873.005	7.7647	7.7647			876.548	6.85454	876.548	6.85454
874.005	7.76449	7.76449			877.548	6.85711	877.548	6.85711
875.005	7.76447	7.76447			878.549	6.85668	878.549	6.85668
876.005	7.76466	7.76466			879.55	6.85452	879.55	6.85452
877.005	7.76508	7.76508			880.565	6.85657	880.565	6.85657
878.005	7.76581	7.76581			881.566	6.85653	881.566	6.85653
879.005	7.76681	7.76681			882.566	6.85549	882.566	6.85549
880.005	7.76803	7.76803			883.567	6.85404	883.567	6.85404
881.005	7.76944	7.76944			884.568	6.85667	884.568	6.85667
882.005	7.77097	7.77097			885.582	6.85281	885.582	6.85281
883.005	7.77258	7.77258			886.583	6.85272	886.583	6.85272
884.005	7.77422	7.77422			887.584	6.85235	887.584	6.85235
885.005	7.77584	7.77584			888.595	6.85404	888.595	6.85404
886.005	7.77738	7.77738			889.596	6.85384	889.596	6.85384
887.005	7.77882	7.77882			890.596	6.85273	890.596	6.85273
888.005	7.78026	7.78026			891.597	6.85124	891.597	6.85124
889.005	7.78173	7.78173			892.598	6.85122	892.598	6.85122
890.005	7.78322	7.78322			893.598	6.85297	893.598	6.85297
891.005	7.78472	7.78472			894.599	6.84997	894.599	6.84997
892.005	7.78623	7.78623			895.611	6.85185	895.611	6.85185
893.005	7.78775	7.78775			896.611	6.85208	896.611	6.85208
894.005	7.78926	7.78926			897.612	6.85064	897.612	6.85064
895.005	7.79077	7.79077			898.612	6.8512	898.612	6.8512
896.005	7.79227	7.79227			899.613	6.85091	899.613	6.85091
897.005	7.79375	7.79375			900.626	6.85257	900.626	6.85257
898.005	7.79522	7.79522			901.626	6.85088	901.626	6.85088
899.005	7.79669	7.79669			902.627	6.84901	902.627	6.84901
900.005	7.79814	7.79814			903.628	6.849	903.628	6.849
901.005	7.7996	7.7996			904.629	6.85184	904.629	6.85184
902.005	7.80106	7.80106			905.63	6.85106	905.63	6.85106
903.005	7.80252	7.80252			906.631	6.85031	906.631	6.85031
904.005	7.80398	7.80398			907.632	6.85025	907.632	6.85025
905.005	7.80546	7.80546			908.632	6.85262	908.632	6.85262
906.005	7.80694	7.80694			909.633	6.84988	909.633	6.84988
907.005	7.80844	7.80844			910.64	6.85186	910.64	6.85186
908.005	7.80997	7.80997			911.641	6.84993	911.641	6.84993
909.005	7.81152	7.81152			912.642	6.85118	912.642	6.85118
910.005	7.81309	7.81309			913.642	6.85225	913.642	6.85225
911.005	7.81466	7.81466			914.643	6.84972	914.643	6.84972
912.005	7.81623	7.81623			915.656	6.84972	915.656	6.84972
913.005	7.81779	7.81779			916.656	6.85031	916.656	6.85031
914.005	7.81934	7.81934			917.657	6.85045	917.657	6.85045
915.005	7.82085	7.82085			918.657	6.85083	918.657	6.85083
916.005	7.82233	7.82233			919.658	6.84829	919.658	6.84829
917.005	7.82377	7.82377			920.671	6.84892	920.671	6.84892
918.005	7.82538	7.82538			921.672	6.85128	921.672	6.85128
919.005	7.82713	7.82713			922.673	6.8518	922.673	6.8518
920.005	7.82895	7.82895			923.674	6.84912	923.674	6.84912
921.005	7.83075	7.83075			924.675	6.84767	924.675	6.84767
922.005	7.83244	7.83244			925.688	6.85011	925.688	6.85011
923.006	7.83394	7.83394			926.688	6.848	926.688	6.848
924.006	7.83517	7.83517			927.689	6.84846	927.689	6.84846
925.006	7.83604	7.83604			928.69	6.84923	928.69	6.84923
926.006	7.83646	7.83646			929.69	6.8486	929.69	6.8486
927.006	7.83634	7.83634			930.703	6.84876	930.703	6.84876
928.006	7.83553	7.83553			931.703	6.84927	931.703	6.84927
929.006	7.83411	7.83411			932.704	6.84762	932.704	6.84762
930.006	7.83223	7.83223			933.705	6.84841	933.705	6.84841
931.006	7.83004	7.83004			934.706	6.84907	934.706	6.84907
932.006	7.82768	7.82768			935.72	6.84907	935.72	6.84907
933.006	7.82532	7.82532			936.721	6.85021	936.721	6.85021
934.006	7.82309	7.82309			937.722	6.84766	937.722	6.84766
935.006	7.82115	7.82115			938.723	6.85217	938.723	6.85217
936.006	7.81965	7.81965			939.724	6.84789	939.724	6.84789
937.006	7.81871	7.81871			940.735	6.84883	940.735	6.84883
938.006	7.81811	7.81811			941.736	6.84914	941.736	6.84914
939.006	7.81773	7.81773			942.737	6.84864	942.737	6.84864
940.006	7.81755	7.81755			943.738	6.84848	943.738	6.84848
941.006	7.81757	7.81757			944.738	6.8478	944.738	6.8478
942.006	7.81777	7.81777			945.739	6.84891	945.739	6.84891
943.006	7.81814	7.81814			946.74	6.84823	946.74	6.84823
944.006	7.81869	7.81869			947.741	6.84743	947.741	6.84743
945.006	7.81938	7.81938			948.751	6.84747	948.751	6.84747
946.006	7.82023	7.82023			949.752	6.84758	949.752	6.84758
947.006	7.82121	7.82121			950.766	6.8498	950.766	6.8498
948.006	7.82247	7.82247			951.767	6.84641	951.767	6.84641
949.006	7.82401	7.82401			952.768	6.84932	952.768	6.84932
950.006	7.82578	7.82578			953.769	6.8475	953.769	6.8475
951.006	7.82771	7.82771			954.77	6.84587	954.77	6.84587
952.006	7.82974	7.82974			955.782	6.84555	955.782	6.84555
953.006	7.83184	7.83184			956.783	6.84758	956.783	6.84758
954.006	7.83392	7.83392			957.783	6.84658	957.783	6.84658
955.006	7.83594	7.83594			958.784	6.84689	958.784	6.84689
956.006	7.83784	7.83784			959.785	6.84585	959.785	6.84585
957.006	7.83956	7.83956			960.798	6.8459	960.798	6.8459
958.006	7.84116	7.84116			961.799	6.8454	961.799	6.8454
959.006	7.8427	7.8427			962.801	6.84763	962.801	6.84763
960.006	7.84418	7.84418			963.801	6.84745	963.801	6.84745
961.006	7.84564	7.84564			964.802	6.84822	964.802	6.84822
962.006	7.84707	7.84707			965.814	6.8493	965.814	6.8493
963.006	7.84851	7.84851			966.815	6.84742	966.815	6.84742
964.006	7.84997	7.84997			967.816	6.84917	967.816	6.84917
965.006	7.85146	7.85146			968.818	6.84733	968.818	6.84733
966.006	7.85301	7.85301			969.818	6.84916	969.818	6.84916
967.006	7.85463	7.85463			970.831	6.84716	970.831	6.84716
968.006	7.85642	7.85642			971.832	6.84721	971.832	6.84721
969.006	7.85836	7.85836			972.833	6.8463	972.833	6.8463
970.006	7.86041	7.86041			973.834	6.84652	973.834	6.84652
971.006	7.86249	7.86249			974.835	6.84862	974.835	6.84862
972.006	7.86455	7.86455			975.846	6.84912	975.846	6.84912
973.006	7.86651	7.86651			976.847	6.84801	976.847	6.84801
974.006	7.86832	7.86832			977.847	6.84761	977.847	6.84761
975.006	7.86991	7.86991			978.848	6.84673	978.848	6.84673
976.006	7.87122	7.87122			979.849	6.84813	979.849	6.84813
977.006	7.87218	7.87218			980.86	6.8475	980.86	6.8475
978.006	7.8727	7.8727			981.861	6.84863	981.861	6.84863
979.006	7.87282	7.87282			982.862	6.8487	982.862	6.8487
980.006	7.87264	7.87264			983.863	6.85105	983.863	6.85105
981.006	7.87226	7.87226			984.863	6.85358	984.863	6.85358
982.006	7.87178	7.87178			985.864	6.85259	985.864	6.85259
983.006	7.8713	7.8713			986.865	6.85149	986.865	6.85149
984.006	7.87093	7.87093			987.866	6.84943	987.866	6.84943
985.006	7.87076	7.87076			988.866	6.85069	988.866	6.85069
986.006	7.8709	7.8709			989.867	6.85206	989.867	6.85206
987.006	7.87144	7.87144			990.877	6.85289	990.877	6.85289
988.006	7.87232	7.87232			991.877	6.85251	991.877	6.85251
989.006	7.87344	7.87344			992.878	6.85319	992.878	6.85319
990.006	7.87475	7.87475			993.879	6.85393	993.879	6.85393
991.006	7.87623	7.87623			994.879	6.85402	994.879	6.85402
992.006	7.87782	7.87782			995.892	6.85338	995.892	6.85338
993.006	7.87951	7.87951			996.893	6.85298	996.893	6.85298
994.006	7.88124	7.88124			997.894	6.85311	997.894	6.85311
995.006	7.88299	7.88299			998.894	6.853	998.894	6.853
996.006	7.88472	7.88472			999.895	6.85288	999.895	6.85288
997.006	7.88638	7.88638			1000.91	6.85446	1000.91	6.85446
998.006	7.88803	7.88803			1001.91	6.85238	1001.91	6.85238
999.006	7.88972	7.88972			1002.91	6.85392	1002.91	6.85392
1000.01	7.89143	7.89143			1003.91	6.85289	1003.91	6.85289
1001.01	7.89318	7.89318			1004.91	6.85464	1004.91	6.85464
1002.01	7.89495	7.89495			1005.91	6.85474	1005.91	6.85474
1003.01	7.89676	7.89676			1006.91	6.85581	1006.91	6.85581
1004.01	7.8986	7.8986			1007.91	6.8565	1007.91	6.8565
1005.01	7.90047	7.90047			1008.91	6.85512	1008.91	6.85512
1006.01	7.90237	7.90237			1009.91	6.8531	1009.91	6.8531
1007.01	7.9043	7.9043			1010.92	6.85765	1010.92	6.85765
1008.01	7.9063	7.9063			1011.92	6.85542	1011.92	6.85542
1009.01	7.90838	7.90838			1012.92	6.85628	1012.92	6.85628
1010.01	7.91052	7.91052			1013.92	6.85695	1013.92	6.85695
1011.01	7.9127	7.9127			1014.92	6.85775	1014.92	6.85775
1012.01	7.91489	7.91489			1015.94	6.85716	1015.94	6.85716
1013.01	7.91707	7.91707			1016.94	6.85727	1016.94	6.85727
1014.01	7.91922	7.91922			1017.94	6.8585	1017.94	6.8585
1015.01	7.92131	7.92131			1018.94	6.86008	1018.94	6.86008
1016.01	7.92333	7.92333			1019.95	6.85534	1019.95	6.85534
1017.01	7.92525	7.92525			1020.95	6.86147	1020.95	6.86147
1018.01	7.92705	7.92705			1021.96	6.8589	1021.96	6.8589
1019.01	7.92875	7.92875			1022.96	6.86215	1022.96	6.86215
1020.01	7.93038	7.93038			1023.96	6.86174	1023.96	6.86174
1021.01	7.93196	7.93196			1024.96	6.861	1024.96	6.861
1022.01	7.93351	7.93351			1025.97	6.86131	1025.97	6.86131
1023.01	7.93506	7.93506			1026.97	6.86168	1026.97	6.86168
1024.01	7.93663	7.93663			1027.97	6.86355	1027.97	6.86355
1025.01	7.93825	7.93825			1028.97	6.86366	1028.97	6.86366
1026.01	7.93995	7.93995			1029.97	6.86215	1029.97	6.86215
1027.01	7.94173	7.94173			1030.99	6.86277	1030.99	6.86277
1028.01	7.94362	7.94362			1031.99	6.86543	1031.99	6.86543
1029.01	7.94559	7.94559			1032.99	6.86505	1032.99	6.86505
1030.01	7.94762	7.94762			1033.99	6.86535	1033.99	6.86535
1031.01	7.94969	7.94969			1034.99	6.86674	1034.99	6.86674
1032.01	7.95179	7.95179			1036	6.86748	1036	6.86748
1033.01	7.95389	7.95389			1037	6.86662	1037	6.86662
1034.01	7.95598	7.95598			1038	6.86718	1038	6.86718
1035.01	7.95803	7.95803			1039	6.86912	1039	6.86912
1036.01	7.96004	7.96004			1040	6.86982	1040	6.86982
1037.01	7.96198	7.96198			1041	6.86992	1041	6.86992
1038.01	7.96415	7.96415			1042	6.86954	1042	6.86954
1039.01	7.96672	7.96672			1043	6.87238	1043	6.87238
1040.01	7.96949	7.96949			1044	6.87098	1044	6.87098
1041.01	7.97229	7.97229			1045.01	6.86947	1045.01	6.86947
1042.01	7.97494	7.97494			1046.02	6.87172	1046.02	6.87172
1043.01	7.97726	7.97726			1047.02	6.87394	1047.02	6.87394
1044.01	7.97907	7.97907			1048.02	6.87351	1048.02	6.87351
1045.01	7.9802	7.9802			1049.02	6.87333	1049.02	6.87333
1046.01	7.98046	7.98046			1050.02	6.87387	1050.02	6.87387
1047.01	7.97968	7.97968			1051.03	6.8746	1051.03	6.8746
1048.01	7.97736	7.97736			1052.03	6.87471	1052.03	6.87471
1049.01	7.97346	7.97346			1053.03	6.87734	1053.03	6.87734
1050.01	7.96839	7.96839			1054.03	6.87668	1054.03	6.87668
1051.01	7.96256	7.96256			1055.04	6.87731	1055.04	6.87731
1052.01	7.95639	7.95639			1056.04	6.87674	1056.04	6.87674
1053.01	7.95029	7.95029			1057.04	6.8777	1057.04	6.8777
1054.01	7.94469	7.94469			1058.04	6.87955	1058.04	6.87955
1055.01	7.94	7.94			1059.05	6.87954	1059.05	6.87954
1056.01	7.93664	7.93664			1060.05	6.88073	1060.05	6.88073
1057.01	7.93502	7.93502			1061.06	6.88202	1061.06	6.88202
1058.01	7.93519	7.93519			1062.06	6.88287	1062.06	6.88287
1059.01	7.93674	7.93674			1063.06	6.88159	1063.06	6.88159
1060.01	7.93941	7.93941			1064.07	6.88171	1064.07	6.88171
1061.01	7.94295	7.94295			1065.07	6.88415	1065.07	6.88415
1062.01	7.94708	7.94708			1066.07	6.88141	1066.07	6.88141
1063.01	7.95155	7.95155			1067.07	6.88456	1067.07	6.88456
1064.01	7.95609	7.95609			1068.07	6.8845	1068.07	6.8845
1065.01	7.96045	7.96045			1069.07	6.88761	1069.07	6.88761
1066.01	7.96436	7.96436			1070.07	6.88599	1070.07	6.88599
1067.01	7.96756	7.96756			1071.08	6.88981	1071.08	6.88981
1068.01	7.97021	7.97021			1072.08	6.88837	1072.08	6.88837
1069.01	7.97269	7.97269			1073.08	6.88798	1073.08	6.88798
1070.01	7.97503	7.97503			1074.08	6.89123	1074.08	6.89123
1071.01	7.97726	7.97726			1075.09	6.89134	1075.09	6.89134
1072.01	7.97939	7.97939			1076.09	6.89105	1076.09	6.89105
1073.01	7.98147	7.98147			1077.1	6.89164	1077.1	6.89164
1074.01	7.98351	7.98351			1078.1	6.893	1078.1	6.893
1075.01	7.98554	7.98554			1079.1	6.89249	1079.1	6.89249
1076.01	7.98759	7.98759			1080.1	6.89331	1080.1	6.89331
1077.01	7.98967	7.98967			1081.11	6.8934	1081.11	6.8934
1078.01	7.99179	7.99179			1082.11	6.89541	1082.11	6.89541
1079.01	7.99389	7.99389			1083.12	6.89716	1083.12	6.89716
1080.01	7.99598	7.99598			1084.12	6.89699	1084.12	6.89699
1081.01	7.99805	7.99805			1085.12	6.898	1085.12	6.898
1082.01	8.0001	8.0001			1086.13	6.8981	1086.13	6.8981
1083.01	8.00213	8.00213			1087.13	6.89885	1087.13	6.89885
1084.01	8.00413	8.00413			1088.13	6.89816	1088.13	6.89816
1085.01	8.00611	8.00611			1089.13	6.8993	1089.13	6.8993
1086.01	8.00805	8.00805			1090.13	6.89806	1090.13	6.89806
1087.01	8.00997	8.00997			1091.14	6.90123	1091.14	6.90123
1088.01	8.01184	8.01184			1092.14	6.9028	1092.14	6.9028
1089.01	8.01367	8.01367			1093.14	6.90381	1093.14	6.90381
1090.01	8.01546	8.01546			1094.14	6.90354	1094.14	6.90354
1091.01	8.01722	8.01722			1095.14	6.904	1095.14	6.904
1092.01	8.01896	8.01896			1096.16	6.90352	1096.16	6.90352
1093.01	8.02068	8.02068			1097.16	6.90777	1097.16	6.90777
1094.01	8.0224	8.0224			1098.16	6.90784	1098.16	6.90784
1095.01	8.02411	8.02411			1099.16	6.90753	1099.16	6.90753
1096.01	8.02583	8.02583			1100.16	6.90794	1100.16	6.90794
1097.01	8.02757	8.02757			1101.17	6.90746	1101.17	6.90746
1098.01	8.02931	8.02931			1102.17	6.9096	1102.17	6.9096
1099.01	8.03103	8.03103			1103.17	6.91077	1103.17	6.91077
1100.01	8.03274	8.03274			1104.17	6.91029	1104.17	6.91029
1101.01	8.03444	8.03444			1105.18	6.91065	1105.18	6.91065
1102.01	8.03615	8.03615			1106.18	6.91194	1106.18	6.91194
1103.01	8.03786	8.03786			1107.18	6.91358	1107.18	6.91358
1104.01	8.03959	8.03959			1108.18	6.91637	1108.18	6.91637
1105.01	8.04133	8.04133			1109.18	6.9164	1109.18	6.9164
1106.01	8.0431	8.0431			1110.18	6.91607	1110.18	6.91607
1107.01	8.0449	8.0449			1111.19	6.91645	1111.19	6.91645
1108.01	8.04674	8.04674			1112.19	6.91526	1112.19	6.91526
1109.01	8.04863	8.04863			1113.19	6.91865	1113.19	6.91865
1110.01	8.05056	8.05056			1114.19	6.91796	1114.19	6.91796
1111.01	8.05252	8.05252			1115.19	6.91922	1115.19	6.91922
1112.01	8.05448	8.05448			1116.19	6.9204	1116.19	6.9204
1113.01	8.05644	8.05644			1117.19	6.92189	1117.19	6.92189
1114.01	8.05839	8.05839			1118.19	6.92163	1118.19	6.92163
1115.01	8.0603	8.0603			1119.19	6.92261	1119.19	6.92261
1116.01	8.06218	8.06218			1120.19	6.92388	1120.19	6.92388
1117.01	8.06399	8.06399			1121.2	6.92389	1121.2	6.92389
1118.01	8.06576	8.06576			1122.2	6.92581	1122.2	6.92581
1119.01	8.06748	8.06748			1123.2	6.92508	1123.2	6.92508
1120.01	8.06918	8.06918			1124.21	6.92582	1124.21	6.92582
1121.01	8.07085	8.07085			1125.21	6.92795	1125.21	6.92795
1122.01	8.0725	8.0725			1126.22	6.9288	1126.22	6.9288
1123.01	8.07412	8.07412			1127.22	6.92925	1127.22	6.92925
1124.01	8.07572	8.07572			1128.22	6.92982	1128.22	6.92982
1125.01	8.0773	8.0773			1129.22	6.92951	1129.22	6.92951
1126.01	8.07887	8.07887			1130.22	6.93338	1130.22	6.93338
1127.01	8.08043	8.08043			1131.22	6.9326	1131.22	6.9326
1128.01	8.08197	8.08197			1132.22	6.93553	1132.22	6.93553
1129.01	8.08346	8.08346			1133.22	6.93551	1133.22	6.93551
1130.01	8.08493	8.08493			1134.22	6.93435	1134.22	6.93435
1131.01	8.08637	8.08637			1135.22	6.93719	1135.22	6.93719
1132.01	8.0878	8.0878			1136.24	6.93605	1136.24	6.93605
1133.01	8.08923	8.08923			1137.24	6.93754	1137.24	6.93754
1134.01	8.09065	8.09065			1138.24	6.93851	1138.24	6.93851
1135.01	8.09209	8.09209			1139.24	6.93767	1139.24	6.93767
1136.01	8.09355	8.09355			1140.24	6.93912	1140.24	6.93912
1137.01	8.09504	8.09504			1141.25	6.94122	1141.25	6.94122
1138.01	8.09657	8.09657			1142.25	6.94115	1142.25	6.94115
1139.01	8.09813	8.09813			1143.26	6.9395	1143.26	6.9395
1140.01	8.09971	8.09971			1144.26	6.94272	1144.26	6.94272
1141.01	8.1013	8.1013			1145.26	6.94268	1145.26	6.94268
1142.01	8.1029	8.1029			1146.27	6.93913	1146.27	6.93913
1143.01	8.10451	8.10451			1147.27	6.94054	1147.27	6.94054
1144.01	8.1061	8.1061			1148.27	6.94228	1148.27	6.94228
1145.01	8.10768	8.10768			1149.27	6.94204	1149.27	6.94204
1146.01	8.10923	8.10923			1150.27	6.9433	1150.27	6.9433
1147.01	8.11075	8.11075			1151.28	6.9462	1151.28	6.9462
1148.01	8.11223	8.11223			1152.28	6.94765	1152.28	6.94765
1149.01	8.11369	8.11369			1153.28	6.94789	1153.28	6.94789
1150.01	8.11514	8.11514			1154.28	6.94862	1154.28	6.94862
1151.01	8.11656	8.11656			1155.28	6.94857	1155.28	6.94857
1152.01	8.11797	8.11797			1156.3	6.95188	1156.3	6.95188
1153.01	8.11937	8.11937			1157.3	6.95124	1157.3	6.95124
1154.01	8.12076	8.12076			1158.3	6.95315	1158.3	6.95315
1155.01	8.12215	8.12215			1159.3	6.95516	1159.3	6.95516
1156.01	8.12353	8.12353			1160.3	6.95327	1160.3	6.95327
1157.01	8.1249	8.1249			1161.31	6.95484	1161.31	6.95484
1158.01	8.1263	8.1263			1162.31	6.95553	1162.31	6.95553
1159.01	8.12773	8.12773			1163.31	6.95901	1163.31	6.95901
1160.01	8.12919	8.12919			1164.31	6.96094	1164.31	6.96094
1161.01	8.13065	8.13065			1165.32	6.95825	1165.32	6.95825
1162.01	8.13209	8.13209			1166.33	6.96051	1166.33	6.96051
1163.01	8.1335	8.1335			1167.33	6.96044	1167.33	6.96044
1164.01	8.13486	8.13486			1168.33	6.96055	1168.33	6.96055
1165.01	8.13616	8.13616			1169.33	6.96245	1169.33	6.96245
1166.01	8.13736	8.13736			1170.33	6.96458	1170.33	6.96458
1167.01	8.13845	8.13845			1171.35	6.96324	1171.35	6.96324
1168.01	8.13941	8.13941			1172.35	6.96409	1172.35	6.96409
1169.01	8.1402	8.1402			1173.35	6.96607	1173.35	6.96607
1170.01	8.14087	8.14087			1174.35	6.96889	1174.35	6.96889
1171.01	8.14144	8.14144			1175.35	6.9677	1175.35	6.9677
1172.01	8.14196	8.14196			1176.36	6.97042	1176.36	6.97042
1173.01	8.14246	8.14246			1177.36	6.96943	1177.36	6.96943
1174.01	8.14299	8.14299			1178.36	6.97086	1178.36	6.97086
1175.01	8.14357	8.14357			1179.36	6.97139	1179.36	6.97139
1176.01	8.14424	8.14424			1180.36	6.9713	1180.36	6.9713
1177.01	8.14505	8.14505			1181.38	6.97329	1181.38	6.97329
1178.01	8.14601	8.14601			1182.38	6.97289	1182.38	6.97289
1179.01	8.14712	8.14712			1183.38	6.97458	1183.38	6.97458
1180.01	8.14835	8.14835			1184.38	6.97599	1184.38	6.97599
1181.01	8.14964	8.14964			1185.38	6.97639	1185.38	6.97639
1182.01	8.15098	8.15098			1186.39	6.97686	1186.39	6.97686
1183.01	8.15233	8.15233			1187.39	6.97772	1187.39	6.97772
1184.01	8.15366	8.15366			1188.41	6.97675	1188.41	6.97675
1185.01	8.15492	8.15492			1189.41	6.98084	1189.41	6.98084
1186.01	8.1561	8.1561			1190.41	6.97994	1190.41	6.97994
1187.01	8.15715	8.15715			1191.42	6.97983	1191.42	6.97983
1188.01	8.15804	8.15804			1192.42	6.98207	1192.42	6.98207
1189.01	8.15878	8.15878			1193.42	6.98171	1193.42	6.98171
1190.01	8.1594	8.1594			1194.43	6.98662	1194.43	6.98662
1191.01	8.15994	8.15994			1195.43	6.98861	1195.43	6.98861
1192.01	8.16044	8.16044			1196.43	6.98809	1196.43	6.98809
1193.01	8.16092	8.16092			1197.43	6.98741	1197.43	6.98741
1194.01	8.16144	8.16144			1198.44	6.99013	1198.44	6.99013
1195.01	8.16201	8.16201			1199.44	6.9915	1199.44	6.9915
1196.01	8.16268	8.16268			1200.44	6.9917	1200.44	6.9917
1197.01	8.16349	8.16349			1201.45	6.99284	1201.45	6.99284
1198.01	8.16445	8.16445			1202.45	6.99271	1202.45	6.99271
1199.01	8.16554	8.16554			1203.45	6.99259	1203.45	6.99259
1200.01	8.16674	8.16674			1204.45	6.99171	1204.45	6.99171
1201.01	8.16801	8.16801			1205.45	6.9958	1205.45	6.9958
1202.01	8.16934	8.16934			1206.45	6.9955	1206.45	6.9955
1203.01	8.17069	8.17069			1207.45	6.99769	1207.45	6.99769
1204.01	8.17205	8.17205			1208.46	6.99627	1208.46	6.99627
1205.01	8.1734	8.1734			1209.46	6.99853	1209.46	6.99853
1206.01	8.1747	8.1747			1210.46	6.99958	1210.46	6.99958
1207.01	8.17594	8.17594			1211.47	7.00147	1211.47	7.00147
1208.01	8.17711	8.17711			1212.47	6.99971	1212.47	6.99971
1209.01	8.17824	8.17824			1213.47	6.99955	1213.47	6.99955
1210.01	8.17933	8.17933			1214.47	6.9999	1214.47	6.9999
1211.01	8.18041	8.18041			1215.47	7.00392	1215.47	7.00392
1212.01	8.18147	8.18147			1216.48	7.00437	1216.48	7.00437
1213.01	8.18252	8.18252			1217.48	7.00532	1217.48	7.00532
1214.01	8.18357	8.18357			1218.5	7.00442	1218.5	7.00442
1215.01	8.18462	8.18462			1219.5	7.00666	1219.5	7.00666
1216.01	8.18568	8.18568			1220.5	7.00692	1220.5	7.00692
1217.01	8.18675	8.18675			1221.52	7.00931	1221.52	7.00931
1218.01	8.18784	8.18784			1222.52	7.01054	1222.52	7.01054
1219.01	8.18894	8.18894			1223.52	7.01118	1223.52	7.01118
1220.01	8.19004	8.19004			1224.52	7.01101	1224.52	7.01101
1221.01	8.19115	8.19115			1225.52	7.00946	1225.52	7.00946
1222.01	8.19227	8.19227			1226.53	7.01237	1226.53	7.01237
1223.01	8.19338	8.19338			1227.53	7.01176	1227.53	7.01176
1224.01	8.19448	8.19448			1228.53	7.01536	1228.53	7.01536
1225.01	8.19558	8.19558			1229.53	7.01512	1229.53	7.01512
1226.01	8.19667	8.19667			1230.53	7.01389	1230.53	7.01389
1227.01	8.19775	8.19775			1231.55	7.01642	1231.55	7.01642
1228.01	8.19882	8.19882			1232.55	7.01682	1232.55	7.01682
1229.01	8.19988	8.19988			1233.55	7.01816	1233.55	7.01816
1230.01	8.20093	8.20093			1234.55	7.01946	1234.55	7.01946
1231.01	8.20197	8.20197			1235.61	7.02125	1235.61	7.02125
1232.01	8.20301	8.20301			1236.56	7.02075	1236.56	7.02075
1233.01	8.20404	8.20404			1237.56	7.02155	1237.56	7.02155
1234.01	8.20506	8.20506			1238.56	7.02209	1238.56	7.02209
1235.01	8.20609	8.20609			1239.56	7.01958	1239.56	7.01958
1236.01	8.2071	8.2071			1240.6	7.02457	1240.6	7.02457
1237.01	8.20812	8.20812			1241.57	7.02418	1241.57	7.02418
1238.01	8.20912	8.20912			1242.57	7.02613	1242.57	7.02613
1239.01	8.2101	8.2101			1243.57	7.0255	1243.57	7.0255
1240.01	8.21105	8.21105			1244.57	7.02818	1244.57	7.02818
1241.01	8.21198	8.21198			1245.63	7.02792	1245.63	7.02792
1242.01	8.21292	8.21292			1246.58	7.02761	1246.58	7.02761
1243.01	8.21386	8.21386			1247.59	7.02832	1247.59	7.02832
1244.01	8.21483	8.21483			1248.6	7.03034	1248.6	7.03034
1245.01	8.21583	8.21583			1249.6	7.03008	1249.6	7.03008
1246.01	8.21687	8.21687			1250.62	7.03044	1250.62	7.03044
1247.01	8.21796	8.21796			1251.6	7.0326	1251.6	7.0326
1248.01	8.21913	8.21913			1252.6	7.03162	1252.6	7.03162
1249.01	8.2204	8.2204			1253.6	7.03067	1253.6	7.03067
1250.01	8.22174	8.22174			1254.6	7.03435	1254.6	7.03435
1251.01	8.22315	8.22315			1255.62	7.03472	1255.62	7.03472
1252.01	8.22457	8.22457			1256.61	7.03444	1256.61	7.03444
1253.01	8.22601	8.22601			1257.61	7.03458	1257.61	7.03458
1254.01	8.22741	8.22741			1258.61	7.03432	1258.61	7.03432
1255.01	8.22877	8.22877			1259.63	7.03524	1259.63	7.03524
1256.01	8.23005	8.23005			1260.64	7.03828	1260.64	7.03828
1257.01	8.23124	8.23124			1261.64	7.0369	1261.64	7.0369
1258.01	8.23229	8.23229			1262.64	7.04003	1262.64	7.04003
1259.01	8.23323	8.23323			1263.64	7.04011	1263.64	7.04011
1260.01	8.23408	8.23408			1264.64	7.03949	1264.64	7.03949
1261.01	8.23485	8.23485			1265.64	7.04142	1265.64	7.04142
1262.01	8.23557	8.23557			1266.64	7.04089	1266.64	7.04089
1263.01	8.23627	8.23627			1267.64	7.04308	1267.64	7.04308
1264.01	8.23696	8.23696			1268.64	7.04292	1268.64	7.04292
1265.01	8.23768	8.23768			1269.65	7.04282	1269.65	7.04282
1266.01	8.23844	8.23844			1270.66	7.04255	1270.66	7.04255
1267.01	8.23927	8.23927			1271.66	7.04787	1271.66	7.04787
1268.01	8.24018	8.24018			1272.66	7.04427	1272.66	7.04427
1269.01	8.24117	8.24117			1273.66	7.04388	1273.66	7.04388
1270.01	8.24221	8.24221			1274.66	7.04444	1274.66	7.04444
1271.01	8.24328	8.24328			1275.66	7.04816	1275.66	7.04816
1272.01	8.24438	8.24438			1276.66	7.04748	1276.66	7.04748
1273.01	8.24549	8.24549			1277.66	7.04871	1277.66	7.04871
1274.01	8.24658	8.24658			1278.67	7.04901	1278.67	7.04901
1275.01	8.24765	8.24765			1279.67	7.04974	1279.67	7.04974
1276.01	8.24868	8.24868			1280.69	7.05085	1280.69	7.05085
1277.01	8.24965	8.24965			1281.69	7.05049	1281.69	7.05049
1278.01	8.25056	8.25056			1282.69	7.05021	1282.69	7.05021
1279.01	8.2514	8.2514			1283.69	7.04941	1283.69	7.04941
1280.01	8.2522	8.2522			1284.69	7.05181	1284.69	7.05181
1281.01	8.25297	8.25297			1285.7	7.05087	1285.7	7.05087
1282.01	8.2537	8.2537			1286.7	7.04947	1286.7	7.04947
1283.01	8.25442	8.25442			1287.7	7.05252	1287.7	7.05252
1284.01	8.25513	8.25513			1288.7	7.05108	1288.7	7.05108
1285.01	8.25584	8.25584			1289.71	7.05266	1289.71	7.05266
1286.01	8.25655	8.25655			1290.72	7.0521	1290.72	7.0521
1287.01	8.25728	8.25728			1291.72	7.05348	1291.72	7.05348
1288.01	8.25803	8.25803			1292.72	7.05465	1292.72	7.05465
1289.01	8.25877	8.25877			1293.72	7.05435	1293.72	7.05435
1290.01	8.25949	8.25949			1294.72	7.0539	1294.72	7.0539
1291.01	8.26021	8.26021			1295.73	7.05544	1295.73	7.05544
1292.01	8.26093	8.26093			1296.73	7.05637	1296.73	7.05637
1293.01	8.26166	8.26166			1297.74	7.05861	1297.74	7.05861
1294.01	8.2624	8.2624			1298.74	7.05641	1298.74	7.05641
1295.01	8.26316	8.26316			1299.74	7.0564	1299.74	7.0564
1296.01	8.26395	8.26395			1300.75	7.0569	1300.75	7.0569
1297.01	8.26478	8.26478			1301.75	7.05841	1301.75	7.05841
1298.01	8.26565	8.26565			1302.75	7.05916	1302.75	7.05916
1299.01	8.26663	8.26663			1303.75	7.05951	1303.75	7.05951
1300.01	8.2677	8.2677			1304.75	7.05919	1304.75	7.05919
1301.01	8.26882	8.26882			1305.77	7.06099	1305.77	7.06099
1302.01	8.26996	8.26996			1306.77	7.06061	1306.77	7.06061
1303.01	8.27109	8.27109			1307.77	7.06077	1307.77	7.06077
1304.01	8.27216	8.27216			1308.78	7.06072	1308.78	7.06072
1305.01	8.27316	8.27316			1309.78	7.06124	1309.78	7.06124
1306.01	8.27403	8.27403			1310.78	7.05246	1310.78	7.05246
1307.01	8.27475	8.27475			1311.78	7.04905	1311.78	7.04905
1308.01	8.27532	8.27532			1312.78	7.0531	1312.78	7.0531
1309.01	8.27592	8.27592			1313.79	7.05333	1313.79	7.05333
1310.01	8.27657	8.27657			1314.79	7.05298	1314.79	7.05298
1311.01	8.27719	8.27719			1315.8	7.05265	1315.8	7.05265
1312.01	8.27771	8.27771			1316.8	7.05655	1316.8	7.05655
1313.01	8.27807	8.27807			1317.8	7.05676	1317.8	7.05676
1314.01	8.27819	8.27819			1318.8	7.05563	1318.8	7.05563
1315.01	8.27802	8.27802			1319.8	7.05627	1319.8	7.05627
1316.01	8.27747	8.27747			1320.8	7.05604	1320.8	7.05604
1317.01	8.27649	8.27649			1321.8	7.05734	1321.8	7.05734
1318.01	8.27497	8.27497			1322.8	7.05693	1322.8	7.05693
1319.01	8.27257	8.27257			1323.8	7.05758	1323.8	7.05758
1320.01	8.26942	8.26942			1324.81	7.05774	1324.81	7.05774
1321.01	8.26572	8.26572			1325.81	7.06038	1325.81	7.06038
1322.01	8.26172	8.26172			1326.81	7.06005	1326.81	7.06005
1323.01	8.25763	8.25763			1327.82	7.05957	1327.82	7.05957
1324.01	8.25367	8.25367			1328.82	7.05882	1328.82	7.05882
1325.01	8.25008	8.25008			1329.82	7.05893	1329.82	7.05893
1326.01	8.24707	8.24707			1330.82	7.05924	1330.82	7.05924
1327.01	8.24487	8.24487			1331.82	7.06097	1331.82	7.06097
1328.01	8.24368	8.24368			1332.82	7.06065	1332.82	7.06065
1329.01	8.24336	8.24336			1333.82	7.06114	1333.82	7.06114
1330.01	8.24373	8.24373			1334.82	7.06215	1334.82	7.06215
1331.01	8.24465	8.24465			1335.83	7.06223	1335.83	7.06223
1332.01	8.246	8.246			1336.83	7.0633	1336.83	7.0633
1333.01	8.24765	8.24765			1337.83	7.06299	1337.83	7.06299
1334.01	8.24946	8.24946			1338.83	7.06329	1338.83	7.06329
1335.01	8.25132	8.25132			1339.83	7.06362	1339.83	7.06362
1336.01	8.25308	8.25308			1340.84	7.06507	1340.84	7.06507
1337.01	8.25462	8.25462			1341.84	7.06434	1341.84	7.06434
1338.01	8.25584	8.25584			1342.85	7.06496	1342.85	7.06496
1339.01	8.25697	8.25697			1343.85	7.06316	1343.85	7.06316
1340.01	8.25811	8.25811			1344.85	7.06586	1344.85	7.06586
1341.01	8.25925	8.25925			1345.85	7.06405	1345.85	7.06405
1342.01	8.26039	8.26039			1346.85	7.06458	1346.85	7.06458
1343.01	8.26151	8.26151			1347.85	7.06382	1347.85	7.06382
1344.01	8.26262	8.26262			1348.85	7.06353	1348.85	7.06353
1345.01	8.26372	8.26372			1349.85	7.06382	1349.85	7.06382
1346.01	8.26479	8.26479			1350.86	7.06287	1350.86	7.06287
1347.01	8.26584	8.26584			1351.86	7.06648	1351.86	7.06648
1348.01	8.26685	8.26685			1352.86	7.06606	1352.86	7.06606
1349.01	8.26783	8.26783			1353.86	7.06458	1353.86	7.06458
1350.01	8.26878	8.26878			1354.86	7.06661	1354.86	7.06661
1351.01	8.2697	8.2697			1355.86	7.06586	1355.86	7.06586
1352.01	8.2706	8.2706			1356.87	7.06475	1356.87	7.06475
1353.01	8.27148	8.27148			1357.87	7.06656	1357.87	7.06656
1354.01	8.27236	8.27236			1358.87	7.06675	1358.87	7.06675
1355.01	8.27324	8.27324			1359.87	7.06515	1359.87	7.06515
1356.01	8.27412	8.27412			1360.88	7.06486	1360.88	7.06486
1357.01	8.27501	8.27501			1361.88	7.06406	1361.88	7.06406
1358.01	8.27592	8.27592			1362.88	7.06658	1362.88	7.06658
1359.01	8.27682	8.27682			1363.88	7.06506	1363.88	7.06506
1360.01	8.2777	8.2777			1364.88	7.06521	1364.88	7.06521
1361.01	8.27858	8.27858			1365.89	7.06436	1365.89	7.06436
1362.01	8.27946	8.27946			1366.89	7.06542	1366.89	7.06542
1363.01	8.28035	8.28035			1367.89	7.0668	1367.89	7.0668
1364.01	8.28125	8.28125			1368.89	7.06462	1368.89	7.06462
1365.01	8.28216	8.28216			1369.89	7.06675	1369.89	7.06675
1366.01	8.2831	8.2831			1370.91	7.06692	1370.91	7.06692
1367.01	8.28407	8.28407			1371.91	7.06625	1371.91	7.06625
1368.01	8.28508	8.28508			1372.91	7.06597	1372.91	7.06597
1369.01	8.28613	8.28613			1373.91	7.06426	1373.91	7.06426
1370.01	8.28722	8.28722			1374.91	7.06461	1374.91	7.06461
1371.01	8.28834	8.28834			1375.92	7.06588	1375.92	7.06588
1372.01	8.28948	8.28948			1376.92	7.06508	1376.92	7.06508
1373.01	8.29063	8.29063			1377.92	7.06638	1377.92	7.06638
1374.01	8.29178	8.29178			1378.92	7.06431	1378.92	7.06431
1375.01	8.29293	8.29293			1379.92	7.06363	1379.92	7.06363
1376.01	8.29406	8.29406			1380.94	7.06436	1380.94	7.06436
1377.01	8.29517	8.29517			1381.94	7.06685	1381.94	7.06685
1378.01	8.29624	8.29624			1382.94	7.06528	1382.94	7.06528
1379.01	8.29729	8.29729			1383.94	7.0653	1383.94	7.0653
1380.01	8.29831	8.29831			1384.94	7.06418	1384.94	7.06418
1381.01	8.29931	8.29931			1385.96	7.06601	1385.96	7.06601
1382.01	8.3003	8.3003			1386.96	7.06526	1386.96	7.06526
1383.01	8.30129	8.30129			1387.96	7.06621	1387.96	7.06621
1384.01	8.30228	8.30228			1388.96	7.06582	1388.96	7.06582
1385.01	8.30327	8.30327			1389.96	7.06517	1389.96	7.06517
1386.01	8.30427	8.30427			1390.97	7.06594	1390.97	7.06594
1387.01	8.30528	8.30528			1391.98	7.06634	1391.98	7.06634
1388.01	8.30632	8.30632			1392.98	7.06514	1392.98	7.06514
1389.01	8.30737	8.30737			1393.98	7.06561	1393.98	7.06561
1390.01	8.30843	8.30843			1394.98	7.06738	1394.98	7.06738
1391.01	8.30949	8.30949			1395.99	7.06712	1395.99	7.06712
1392.01	8.31057	8.31057			1396.99	7.06608	1396.99	7.06608
1393.01	8.31165	8.31165			1398	7.0665	1398	7.0665
1394.01	8.31274	8.31274			1399	7.06394	1399	7.06394
1395.01	8.31382	8.31382			1400	7.06577	1400	7.06577
1396.01	8.31491	8.31491			1401.01	7.06432	1401.01	7.06432
1397.01	8.316	8.316			1402.01	7.06451	1402.01	7.06451
1398.01	8.31709	8.31709			1403.01	7.06535	1403.01	7.06535
1399.01	8.31818	8.31818			1404.01	7.06616	1404.01	7.06616
1400.01	8.31927	8.31927			1405.01	7.06369	1405.01	7.06369
1401.01	8.32036	8.32036			1406.02	7.06468	1406.02	7.06468
1402.01	8.32145	8.32145			1407.02	7.06611	1407.02	7.06611
1403.01	8.32255	8.32255			1408.02	7.06365	1408.02	7.06365
1404.01	8.32365	8.32365			1409.02	7.06347	1409.02	7.06347
1405.01	8.32475	8.32475			1410.02	7.06144	1410.02	7.06144
1406.01	8.32586	8.32586			1411.03	7.06538	1411.03	7.06538
1407.01	8.32699	8.32699			1412.03	7.06375	1412.03	7.06375
1408.01	8.32812	8.32812			1413.03	7.06446	1413.03	7.06446
1409.01	8.32926	8.32926			1414.04	7.06346	1414.04	7.06346
1410.01	8.33042	8.33042			1415.04	7.06315	1415.04	7.06315
1411.01	8.33158	8.33158			1416.05	7.06361	1416.05	7.06361
1412.01	8.33275	8.33275			1417.05	7.06471	1417.05	7.06471
1413.01	8.33392	8.33392			1418.05	7.06445	1418.05	7.06445
1414.01	8.3351	8.3351			1419.05	7.06597	1419.05	7.06597
1415.01	8.33628	8.33628			1420.05	7.06422	1420.05	7.06422
1416.01	8.33746	8.33746			1421.07	7.06153	1421.07	7.06153
1417.01	8.33865	8.33865			1422.07	7.06297	1422.07	7.06297
1418.01	8.33983	8.33983			1423.07	7.06184	1423.07	7.06184
1419.01	8.34102	8.34102			1424.07	7.06067	1424.07	7.06067
1420.01	8.34221	8.34221			1425.07	7.06445	1425.07	7.06445
1421.01	8.3434	8.3434			1426.08	7.06419	1426.08	7.06419
1422.01	8.34459	8.34459			1427.08	7.06528	1427.08	7.06528
1423.01	8.34579	8.34579			1428.08	7.06503	1428.08	7.06503
1424.01	8.34699	8.34699			1429.08	7.0629	1429.08	7.0629
1425.01	8.34819	8.34819			1430.08	7.06366	1430.08	7.06366
1426.01	8.34939	8.34939			1431.08	7.05986	1431.08	7.05986
1427.01	8.35058	8.35058			1432.08	7.06164	1432.08	7.06164
1428.01	8.35178	8.35178			1433.08	7.0635	1433.08	7.0635
1429.01	8.35297	8.35297			1434.08	7.06112	1434.08	7.06112
1430.01	8.35416	8.35416			1435.08	7.06083	1435.08	7.06083
1431.01	8.35534	8.35534			1436.1	7.0604	1436.1	7.0604
1432.01	8.35652	8.35652			1437.1	7.06297	1437.1	7.06297
1433.01	8.35771	8.35771			1438.1	7.06107	1438.1	7.06107
1434.01	8.35889	8.35889			1439.1	7.06195	1439.1	7.06195
1435.01	8.36009	8.36009			1440.1	7.06171	1440.1	7.06171
1436.01	8.3613	8.3613			1441.1	7.05932	1441.1	7.05932
1437.01	8.36252	8.36252			1442.1	7.06202	1442.1	7.06202
1438.01	8.36375	8.36375			1443.1	7.06058	1443.1	7.06058
1439.01	8.365	8.365			1444.1	7.06119	1444.1	7.06119
1440.01	8.36626	8.36626			1445.1	7.06144	1445.1	7.06144
1441.01	8.36752	8.36752			1446.11	7.06011	1446.11	7.06011
1442.01	8.3688	8.3688			1447.11	7.06074	1447.11	7.06074
1443.01	8.37008	8.37008			1448.11	7.05993	1448.11	7.05993
1444.01	8.37137	8.37137			1449.11	7.06022	1449.11	7.06022
1445.01	8.37267	8.37267			1450.11	7.05754	1450.11	7.05754
1446.01	8.37398	8.37398			1451.12	7.05732	1451.12	7.05732
1447.01	8.3753	8.3753			1452.13	7.06264	1452.13	7.06264
1448.01	8.37663	8.37663			1453.13	7.06134	1453.13	7.06134
1449.01	8.37798	8.37798			1454.13	7.05878	1454.13	7.05878
1450.01	8.37936	8.37936			1455.13	7.06044	1455.13	7.06044
1451.01	8.38075	8.38075			1456.13	7.05927	1456.13	7.05927
1452.01	8.38215	8.38215			1457.13	7.05691	1457.13	7.05691
1453.01	8.38356	8.38356			1458.14	7.0574	1458.14	7.0574
1454.01	8.38497	8.38497			1459.14	7.05958	1459.14	7.05958
1455.01	8.38636	8.38636			1460.15	7.05931	1460.15	7.05931
1456.01	8.38774	8.38774			1461.15	7.05941	1461.15	7.05941
1457.01	8.38909	8.38909			1462.15	7.05923	1462.15	7.05923
1458.01	8.3904	8.3904			1463.15	7.05673	1463.15	7.05673
1459.01	8.39168	8.39168			1464.15	7.05813	1464.15	7.05813
1460.01	8.39292	8.39292			1465.15	7.05784	1465.15	7.05784
1461.01	8.39413	8.39413			1466.16	7.05925	1466.16	7.05925
1462.01	8.39533	8.39533			1467.16	7.05919	1467.16	7.05919
1463.01	8.39651	8.39651			1468.16	7.05778	1468.16	7.05778
1464.01	8.3977	8.3977			1469.16	7.05925	1469.16	7.05925
1465.01	8.3989	8.3989			1470.16	7.05787	1470.16	7.05787
1466.01	8.40011	8.40011			1471.16	7.05705	1471.16	7.05705
1467.01	8.40136	8.40136			1472.16	7.05967	1472.16	7.05967
1468.01	8.40264	8.40264			1473.16	7.05952	1473.16	7.05952
1469.01	8.40395	8.40395			1474.16	7.05904	1474.16	7.05904
1470.01	8.40528	8.40528			1475.17	7.05998	1475.17	7.05998
1471.01	8.40662	8.40662			1476.17	7.0567	1476.17	7.0567
1472.01	8.40798	8.40798			1477.17	7.0574	1477.17	7.0574
1473.01	8.40936	8.40936			1478.17	7.05897	1478.17	7.05897
1474.01	8.41075	8.41075			1479.17	7.05766	1479.17	7.05766
1475.01	8.41215	8.41215			1480.17	7.05842	1480.17	7.05842
1476.01	8.41357	8.41357			1481.18	7.057	1481.18	7.057
1477.01	8.41499	8.41499			1482.18	7.05902	1482.18	7.05902
1478.01	8.41644	8.41644			1483.18	7.05657	1483.18	7.05657
1479.01	8.41791	8.41791			1484.18	7.05685	1484.18	7.05685
1480.01	8.41942	8.41942			1485.18	7.05673	1485.18	7.05673
1481.01	8.42097	8.42097			1486.19	7.05878	1486.19	7.05878
1482.01	8.42253	8.42253			1487.19	7.05792	1487.19	7.05792
1483.01	8.4241	8.4241			1488.2	7.05622	1488.2	7.05622
1484.01	8.42566	8.42566			1489.21	7.05808	1489.21	7.05808
1485.01	8.4272	8.4272			1490.21	7.05808	1490.21	7.05808
1486.01	8.42871	8.42871			1491.22	7.05729	1491.22	7.05729
1487.01	8.43017	8.43017			1492.22	7.05712	1492.22	7.05712
1488.01	8.43158	8.43158			1493.22	7.05786	1493.22	7.05786
1489.01	8.43292	8.43292			1494.22	7.05683	1494.22	7.05683
1490.01	8.43421	8.43421			1495.22	7.05559	1495.22	7.05559
1491.01	8.43546	8.43546			1496.24	7.05629	1496.24	7.05629
1492.01	8.43668	8.43668			1497.24	7.05407	1497.24	7.05407
1493.01	8.43788	8.43788			1498.24	7.05397	1498.24	7.05397
1494.01	8.43906	8.43906			1499.24	7.05695	1499.24	7.05695
1495.01	8.44024	8.44024			1500.24	7.05664	1500.24	7.05664
1496.01	8.44142	8.44142			1501.25	7.05476	1501.25	7.05476
1497.01	8.44262	8.44262			1502.25	7.05541	1502.25	7.05541
1498.01	8.44384	8.44384			1503.25	7.05545	1503.25	7.05545
1499.01	8.44507	8.44507			1504.25	7.05444	1504.25	7.05444
1500.01	8.44629	8.44629			1505.26	7.05642	1505.26	7.05642
1501.01	8.44751	8.44751			1506.26	7.05463	1506.26	7.05463
1502.01	8.44872	8.44872			1507.26	7.05421	1507.26	7.05421
1503.01	8.44995	8.44995			1508.26	7.05561	1508.26	7.05561
1504.01	8.45118	8.45118			1509.26	7.05553	1509.26	7.05553
1505.01	8.45243	8.45243			1510.26	7.05645	1510.26	7.05645
1506.01	8.4537	8.4537			1511.27	7.05751	1511.27	7.05751
1507.01	8.45499	8.45499			1512.27	7.05562	1512.27	7.05562
1508.01	8.45632	8.45632			1513.27	7.05554	1513.27	7.05554
1509.01	8.45769	8.45769			1514.27	7.0546	1514.27	7.0546
1510.01	8.4591	8.4591			1515.27	7.05519	1515.27	7.05519
1511.01	8.46055	8.46055			1516.28	7.05368	1516.28	7.05368
1512.01	8.46202	8.46202			1517.28	7.05534	1517.28	7.05534
1513.01	8.4635	8.4635			1518.3	7.05407	1518.3	7.05407
1514.01	8.46499	8.46499			1519.3	7.05634	1519.3	7.05634
1515.01	8.46647	8.46647			1520.3	7.05626	1520.3	7.05626
1516.01	8.46794	8.46794			1521.32	7.05601	1521.32	7.05601
1517.01	8.46939	8.46939			1522.32	7.05545	1522.32	7.05545
1518.01	8.47081	8.47081			1523.32	7.05646	1523.32	7.05646
1519.01	8.47219	8.47219			1524.32	7.05722	1524.32	7.05722
1520.01	8.47355	8.47355			1525.32	7.05523	1525.32	7.05523
1521.01	8.4749	8.4749			1526.33	7.05436	1526.33	7.05436
1522.01	8.47623	8.47623			1527.33	7.05367	1527.33	7.05367
1523.01	8.47756	8.47756			1528.33	7.05535	1528.33	7.05535
1524.01	8.47888	8.47888			1529.33	7.05451	1529.33	7.05451
1525.01	8.4802	8.4802			1530.33	7.05282	1530.33	7.05282
1526.01	8.48152	8.48152			1531.34	7.05417	1531.34	7.05417
1527.01	8.48285	8.48285			1532.35	7.05583	1532.35	7.05583
1528.01	8.48419	8.48419			1533.35	7.0551	1533.35	7.0551
1529.01	8.48554	8.48554			1534.35	7.05503	1534.35	7.05503
1530.01	8.48691	8.48691			1535.35	7.05502	1535.35	7.05502
1531.01	8.48829	8.48829			1536.36	7.05609	1536.36	7.05609
1532.01	8.48967	8.48967			1537.36	7.05324	1537.36	7.05324
1533.01	8.49105	8.49105			1538.36	7.05447	1538.36	7.05447
1534.01	8.49243	8.49243			1539.36	7.05279	1539.36	7.05279
1535.01	8.4938	8.4938			1540.36	7.05238	1540.36	7.05238
1536.01	8.49515	8.49515			1541.38	7.05459	1541.38	7.05459
1537.01	8.49648	8.49648			1542.38	7.05324	1542.38	7.05324
1538.01	8.49779	8.49779			1543.38	7.05345	1543.38	7.05345
1539.01	8.49907	8.49907			1544.38	7.05442	1544.38	7.05442
1540.01	8.50031	8.50031			1545.38	7.05223	1545.38	7.05223
1541.01	8.50153	8.50153			1546.39	7.05345	1546.39	7.05345
1542.01	8.50273	8.50273			1547.39	7.05557	1547.39	7.05557
1543.01	8.50391	8.50391			1548.39	7.0557	1548.39	7.0557
1544.01	8.5051	8.5051			1549.39	7.05456	1549.39	7.05456
1545.01	8.5063	8.5063			1550.4	7.05472	1550.4	7.05472
1546.01	8.50752	8.50752			1551.4	7.05532	1551.4	7.05532
1547.01	8.50877	8.50877			1552.4	7.05437	1552.4	7.05437
1548.01	8.51005	8.51005			1553.4	7.05318	1553.4	7.05318
1549.01	8.51138	8.51138			1554.4	7.05314	1554.4	7.05314
1550.01	8.51276	8.51276			1555.4	7.05381	1555.4	7.05381
1551.01	8.51416	8.51416			1556.41	7.05411	1556.41	7.05411
1552.01	8.51559	8.51559			1557.41	7.05311	1557.41	7.05311
1553.01	8.51703	8.51703			1558.41	7.05406	1558.41	7.05406
1554.01	8.51848	8.51848			1559.41	7.05524	1559.41	7.05524
1555.01	8.51991	8.51991			1560.41	7.05479	1560.41	7.05479
1556.01	8.52133	8.52133			1561.42	7.05371	1561.42	7.05371
1557.01	8.52273	8.52273			1562.42	7.05538	1562.42	7.05538
1558.01	8.52408	8.52408			1563.42	7.0523	1563.42	7.0523
1559.01	8.5254	8.5254			1564.43	7.05654	1564.43	7.05654
1560.01	8.52667	8.52667			1565.43	7.05651	1565.43	7.05651
1561.01	8.52791	8.52791			1566.44	7.05383	1566.44	7.05383
1562.01	8.52913	8.52913			1567.44	7.05395	1567.44	7.05395
1563.01	8.53034	8.53034			1568.44	7.05178	1568.44	7.05178
1564.01	8.53155	8.53155			1569.44	7.05616	1569.44	7.05616
1565.01	8.53277	8.53277			1570.44	7.05289	1570.44	7.05289
1566.01	8.534	8.534			1571.46	7.05248	1571.46	7.05248
1567.01	8.53526	8.53526			1572.46	7.04998	1572.46	7.04998
1568.01	8.53656	8.53656			1573.46	7.05316	1573.46	7.05316
1569.01	8.53789	8.53789			1574.46	7.05252	1574.46	7.05252
1570.01	8.53926	8.53926			1575.46	7.05418	1575.46	7.05418
1571.01	8.54066	8.54066			1576.47	7.05169	1576.47	7.05169
1572.01	8.54208	8.54208			1577.47	7.05166	1577.47	7.05166
1573.01	8.54351	8.54351			1578.49	7.05434	1578.49	7.05434
1574.01	8.54494	8.54494			1579.49	7.05195	1579.49	7.05195
1575.01	8.54638	8.54638			1580.49	7.05225	1580.49	7.05225
1576.01	8.54779	8.54779			1581.5	7.05432	1581.5	7.05432
1577.01	8.54919	8.54919			1582.5	7.05381	1582.5	7.05381
1578.01	8.55056	8.55056			1583.51	7.05196	1583.51	7.05196
1579.01	8.55191	8.55191			1584.52	7.05321	1584.52	7.05321
1580.01	8.55325	8.55325			1585.52	7.05431	1585.52	7.05431
1581.01	8.55459	8.55459			1586.53	7.05469	1586.53	7.05469
1582.01	8.55591	8.55591			1587.53	7.05322	1587.53	7.05322
1583.01	8.55723	8.55723			1588.53	7.0532	1588.53	7.0532
1584.01	8.55853	8.55853			1589.53	7.05236	1589.53	7.05236
1585.01	8.55981	8.55981			1590.53	7.0528	1590.53	7.0528
1586.01	8.56106	8.56106			1591.55	7.05241	1591.55	7.05241
1587.01	8.5623	8.5623			1592.55	7.05218	1592.55	7.05218
1588.01	8.5635	8.5635			1593.55	7.05347	1593.55	7.05347
1589.01	8.56468	8.56468			1594.55	7.05355	1594.55	7.05355
1590.01	8.56585	8.56585			1595.55	7.05326	1595.55	7.05326
1591.01	8.56702	8.56702			1596.56	7.05268	1596.56	7.05268
1592.01	8.56817	8.56817			1597.56	7.05435	1597.56	7.05435
1593.01	8.56929	8.56929			1598.56	7.05405	1598.56	7.05405
1594.01	8.57038	8.57038			1599.57	7.05404	1599.57	7.05404
1595.01	8.57143	8.57143			1600.57	7.05597	1600.57	7.05597
1596.01	8.57243	8.57243			1601.57	7.05289	1601.57	7.05289
1597.01	8.57338	8.57338			1602.57	7.05421	1602.57	7.05421
1598.01	8.57425	8.57425			1603.57	7.05446	1603.57	7.05446
1599.01	8.57505	8.57505			1604.57	7.05342	1604.57	7.05342
1600.01	8.57574	8.57574			1605.57	7.05358	1605.57	7.05358
1601.01	8.57635	8.57635			1606.58	7.05287	1606.58	7.05287
1602.01	8.5769	8.5769			1607.58	7.05442	1607.58	7.05442
1603.01	8.5774	8.5774			1608.6	7.05426	1608.6	7.05426
1604.01	8.57789	8.57789			1609.6	7.0551	1609.6	7.0551
1605.01	8.57838	8.57838			1610.6	7.05365	1610.6	7.05365
1606.01	8.57889	8.57889			1611.6	7.05364	1611.6	7.05364
1607.01	8.57944	8.57944			1612.6	7.05464	1612.6	7.05464
1608.01	8.58006	8.58006			1613.6	7.05294	1613.6	7.05294
1609.01	8.58075	8.58075			1614.6	7.05327	1614.6	7.05327
1610.01	8.58148	8.58148			1615.6	7.05567	1615.6	7.05567
1611.01	8.58224	8.58224			1616.61	7.05529	1616.61	7.05529
1612.01	8.58302	8.58302			1617.61	7.05412	1617.61	7.05412
1613.01	8.58382	8.58382			1618.61	7.05666	1618.61	7.05666
1614.01	8.58464	8.58464			1619.61	7.05512	1619.61	7.05512
1615.01	8.58547	8.58547			1620.62	7.05509	1620.62	7.05509
1616.01	8.5863	8.5863			1621.63	7.05668	1621.63	7.05668
1617.01	8.58714	8.58714			1622.63	7.05438	1622.63	7.05438
1618.01	8.58797	8.58797			1623.63	7.05438	1623.63	7.05438
1619.01	8.5888	8.5888			1624.63	7.05667	1624.63	7.05667
1620.01	8.58963	8.58963			1625.63	7.05745	1625.63	7.05745
1621.01	8.59046	8.59046			1626.64	7.0561	1626.64	7.0561
1622.01	8.59129	8.59129			1627.64	7.05763	1627.64	7.05763
1623.01	8.59213	8.59213			1628.64	7.05758	1628.64	7.05758
1624.01	8.59298	8.59298			1629.64	7.05622	1629.64	7.05622
1625.01	8.59385	8.59385			1630.64	7.05574	1630.64	7.05574
1626.01	8.59473	8.59473			1631.66	7.05765	1631.66	7.05765
1627.01	8.59562	8.59562			1632.66	7.05515	1632.66	7.05515
1628.01	8.59654	8.59654			1633.66	7.05838	1633.66	7.05838
1629.01	8.59748	8.59748			1634.66	7.05839	1634.66	7.05839
1630.01	8.59843	8.59843			1635.66	7.05612	1635.66	7.05612
1631.01	8.59939	8.59939			1636.67	7.06001	1636.67	7.06001
1632.01	8.60036	8.60036			1637.67	7.05752	1637.67	7.05752
1633.01	8.60135	8.60135			1638.67	7.05961	1638.67	7.05961
1634.01	8.60236	8.60236			1639.68	7.05867	1639.68	7.05867
1635.01	8.60338	8.60338			1640.68	7.05863	1640.68	7.05863
1636.01	8.60443	8.60443			1641.69	7.05936	1641.69	7.05936
1637.01	8.60551	8.60551			1642.69	7.05981	1642.69	7.05981
1638.01	8.6066	8.6066			1643.69	7.05918	1643.69	7.05918
1639.01	8.60776	8.60776			1644.69	7.05712	1644.69	7.05712
1640.01	8.60904	8.60904			1645.69	7.05952	1645.69	7.05952
1641.01	8.61043	8.61043			1646.7	7.05954	1646.7	7.05954
1642.01	8.61187	8.61187			1647.7	7.05949	1647.7	7.05949
1643.01	8.61331	8.61331			1648.7	7.05829	1648.7	7.05829
1644.01	8.61473	8.61473			1649.71	7.05811	1649.71	7.05811
1645.01	8.61606	8.61606			1650.71	7.05931	1650.71	7.05931
1646.01	8.61727	8.61727			1651.71	7.06062	1651.71	7.06062
1647.01	8.6183	8.6183			1652.71	7.06107	1652.71	7.06107
1648.01	8.61912	8.61912			1653.71	7.06292	1653.71	7.06292
1649.01	8.61968	8.61968			1654.71	7.06092	1654.71	7.06092
1650.01	8.61996	8.61996			1655.71	7.06038	1655.71	7.06038
1651.01	8.62001	8.62001			1656.72	7.06106	1656.72	7.06106
1652.01	8.61989	8.61989			1657.72	7.0611	1657.72	7.0611
1653.01	8.61965	8.61965			1658.72	7.06044	1658.72	7.06044
1654.01	8.61936	8.61936			1659.72	7.06262	1659.72	7.06262
1655.01	8.61907	8.61907			1660.72	7.06364	1660.72	7.06364
1656.01	8.61883	8.61883			1661.74	7.06019	1661.74	7.06019
1657.01	8.6187	8.6187			1662.74	7.06017	1662.74	7.06017
1658.01	8.61874	8.61874			1663.74	7.06287	1663.74	7.06287
1659.01	8.61897	8.61897			1664.74	7.0616	1664.74	7.0616
1660.01	8.61931	8.61931			1665.74	7.06363	1665.74	7.06363
1661.01	8.61972	8.61972			1666.75	7.06229	1666.75	7.06229
1662.01	8.6202	8.6202			1667.75	7.06195	1667.75	7.06195
1663.01	8.62074	8.62074			1668.75	7.06339	1668.75	7.06339
1664.01	8.62132	8.62132			1669.76	7.06343	1669.76	7.06343
1665.01	8.62195	8.62195			1670.76	7.0631	1670.76	7.0631
1666.01	8.6226	8.6226			1671.77	7.06369	1671.77	7.06369
1667.01	8.62326	8.62326			1672.77	7.06569	1672.77	7.06569
1668.01	8.62394	8.62394			1673.77	7.06491	1673.77	7.06491
1669.01	8.62462	8.62462			1674.77	7.06457	1674.77	7.06457
1670.01	8.62532	8.62532			1675.82	7.06592	1675.82	7.06592
1671.01	8.62604	8.62604			1676.79	7.06569	1676.79	7.06569
1672.01	8.62679	8.62679			1677.79	7.06624	1677.79	7.06624
1673.01	8.62757	8.62757			1678.79	7.06613	1678.79	7.06613
1674.01	8.62837	8.62837			1679.79	7.06569	1679.79	7.06569
1675.01	8.6292	8.6292			1680.82	7.06574	1680.82	7.06574
1676.01	8.63007	8.63007			1681.8	7.06727	1681.8	7.06727
1677.01	8.63096	8.63096			1682.8	7.06857	1682.8	7.06857
1678.01	8.63187	8.63187			1683.81	7.06856	1683.81	7.06856
1679.01	8.63283	8.63283			1684.81	7.06693	1684.81	7.06693
1680.01	8.63385	8.63385			1685.83	7.06697	1685.83	7.06697
1681.01	8.63492	8.63492			1686.82	7.06818	1686.82	7.06818
1682.01	8.63603	8.63603			1687.82	7.06942	1687.82	7.06942
1683.01	8.63717	8.63717			1688.82	7.06926	1688.82	7.06926
1684.01	8.63832	8.63832			1689.82	7.06856	1689.82	7.06856
1685.01	8.63947	8.63947			1690.84	7.06905	1690.84	7.06905
1686.01	8.64061	8.64061			1691.84	7.0691	1691.84	7.0691
1687.01	8.64171	8.64171			1692.84	7.07011	1692.84	7.07011
1688.01	8.64277	8.64277			1693.84	7.06805	1693.84	7.06805
1689.01	8.64378	8.64378			1694.84	7.0712	1694.84	7.0712
1690.01	8.64474	8.64474			1695.85	7.06904	1695.85	7.06904
1691.01	8.64568	8.64568			1696.85	7.07086	1696.85	7.07086
1692.01	8.6466	8.6466			1697.85	7.06895	1697.85	7.06895
1693.01	8.64749	8.64749			1698.86	7.0712	1698.86	7.0712
1694.01	8.64838	8.64838			1699.86	7.07322	1699.86	7.07322
1695.01	8.64926	8.64926			1700.86	7.07278	1700.86	7.07278
1696.01	8.65015	8.65015			1701.86	7.07294	1701.86	7.07294
1697.01	8.65105	8.65105			1702.87	7.07149	1702.87	7.07149
1698.01	8.65196	8.65196			1703.87	7.07382	1703.87	7.07382
1699.01	8.65289	8.65289			1704.87	7.07259	1704.87	7.07259
1700.01	8.65384	8.65384			1705.88	7.07099	1705.88	7.07099
1701.01	8.6548	8.6548			1706.88	7.0716	1706.88	7.0716
1702.01	8.65577	8.65577			1707.88	7.07161	1707.88	7.07161
1703.01	8.65674	8.65674			1708.88	7.07515	1708.88	7.07515
1704.01	8.65771	8.65771			1709.88	7.07535	1709.88	7.07535
1705.01	8.65868	8.65868			1710.89	7.0752	1710.89	7.0752
1706.01	8.65964	8.65964			1711.89	7.07422	1711.89	7.07422
1707.01	8.6606	8.6606			1712.89	7.0758	1712.89	7.0758
1708.01	8.66154	8.66154			1713.9	7.07847	1713.9	7.07847
1709.01	8.66246	8.66246			1714.9	7.07852	1714.9	7.07852
1710.01	8.66336	8.66336			1715.91	7.07556	1715.91	7.07556
1711.01	8.66425	8.66425			1716.91	7.07756	1716.91	7.07756
1712.01	8.66513	8.66513			1717.91	7.07676	1717.91	7.07676
1713.01	8.666	8.666			1718.91	7.07693	1718.91	7.07693
1714.01	8.66686	8.66686			1719.91	7.0763	1719.91	7.0763
1715.01	8.66774	8.66774			1720.92	7.07877	1720.92	7.07877
1716.01	8.66862	8.66862			1721.92	7.0776	1721.92	7.0776
1717.01	8.66952	8.66952			1722.92	7.08007	1722.92	7.08007
1718.01	8.67043	8.67043			1723.93	7.07859	1723.93	7.07859
1719.01	8.67138	8.67138			1724.93	7.07914	1724.93	7.07914
1720.01	8.67236	8.67236			1725.94	7.07919	1725.94	7.07919
1721.01	8.67339	8.67339			1726.94	7.08177	1726.94	7.08177
1722.01	8.67443	8.67443			1727.94	7.08096	1727.94	7.08096
1723.01	8.67548	8.67548			1728.94	7.08254	1728.94	7.08254
1724.01	8.67653	8.67653			1729.94	7.08087	1729.94	7.08087
1725.01	8.67757	8.67757			1730.95	7.08373	1730.95	7.08373
1726.01	8.67858	8.67858			1731.95	7.08306	1731.95	7.08306
1727.01	8.67955	8.67955			1732.96	7.08302	1732.96	7.08302
1728.01	8.68047	8.68047			1733.96	7.08144	1733.96	7.08144
1729.01	8.68133	8.68133			1734.96	7.08465	1734.96	7.08465
1730.01	8.68213	8.68213			1735.97	7.08525	1735.97	7.08525
1731.01	8.68287	8.68287			1736.97	7.08422	1736.97	7.08422
1732.01	8.68358	8.68358			1737.97	7.08427	1737.97	7.08427
1733.01	8.68425	8.68425			1738.97	7.08521	1738.97	7.08521
1734.01	8.68491	8.68491			1739.97	7.08538	1739.97	7.08538
1735.01	8.68557	8.68557			1740.97	7.08557	1740.97	7.08557
1736.01	8.68624	8.68624			1741.97	7.08691	1741.97	7.08691
1737.01	8.68692	8.68692			1742.98	7.0869	1742.98	7.0869
1738.01	8.68765	8.68765			1743.98	7.08708	1743.98	7.08708
1739.01	8.68842	8.68842			1744.98	7.08897	1744.98	7.08897
1740.01	8.68921	8.68921			1745.98	7.08884	1745.98	7.08884
1741.01	8.69002	8.69002			1746.98	7.08847	1746.98	7.08847
1742.01	8.69085	8.69085			1747.99	7.08904	1747.99	7.08904
1743.01	8.69169	8.69169			1748.99	7.08908	1748.99	7.08908
1744.01	8.69254	8.69254			1749.99	7.08846	1749.99	7.08846
1745.01	8.69339	8.69339			1750.99	7.0916	1750.99	7.0916
1746.01	8.69426	8.69426			1751.99	7.09141	1751.99	7.09141
1747.01	8.69513	8.69513			1752.99	7.09012	1752.99	7.09012
1748.01	8.69601	8.69601			1753.99	7.09045	1753.99	7.09045
1749.01	8.69688	8.69688			1754.99	7.08997	1754.99	7.08997
1750.01	8.69778	8.69778			1756	7.09194	1756	7.09194
1751.01	8.69868	8.69868			1757	7.09196	1757	7.09196
1752.01	8.6996	8.6996			1758.02	7.09144	1758.02	7.09144
1753.01	8.70052	8.70052			1759.02	7.09083	1759.02	7.09083
1754.01	8.70145	8.70145			1760.02	7.09365	1760.02	7.09365
1755.01	8.70237	8.70237			1761.03	7.09368	1761.03	7.09368
1756.01	8.70329	8.70329			1762.03	7.09301	1762.03	7.09301
1757.01	8.7042	8.7042			1763.03	7.09271	1763.03	7.09271
1758.01	8.70509	8.70509			1764.04	7.09489	1764.04	7.09489
1759.01	8.70597	8.70597			1765.04	7.09546	1765.04	7.09546
1760.01	8.70683	8.70683			1766.05	7.09496	1766.05	7.09496
1761.01	8.70768	8.70768			1767.05	7.09729	1767.05	7.09729
1762.01	8.70852	8.70852			1768.05	7.09712	1768.05	7.09712
1763.01	8.70935	8.70935			1769.05	7.09851	1769.05	7.09851
1764.01	8.71018	8.71018			1770.05	7.09836	1770.05	7.09836
1765.01	8.71101	8.71101			1771.06	7.09812	1771.06	7.09812
1766.01	8.71184	8.71184			1772.06	7.09814	1772.06	7.09814
1767.01	8.71268	8.71268			1773.06	7.0997	1773.06	7.0997
1768.01	8.71352	8.71352			1774.07	7.10102	1774.07	7.10102
1769.01	8.71439	8.71439			1775.07	7.10163	1775.07	7.10163
1770.01	8.71526	8.71526			1776.07	7.10113	1776.07	7.10113
1771.01	8.71613	8.71613			1777.07	7.10253	1777.07	7.10253
1772.01	8.71702	8.71702			1778.07	7.1031	1778.07	7.1031
1773.01	8.7179	8.7179			1779.07	7.10365	1779.07	7.10365
1774.01	8.71879	8.71879			1780.07	7.10187	1780.07	7.10187
1775.01	8.71969	8.71969			1781.08	7.10411	1781.08	7.10411
1776.01	8.72058	8.72058			1782.08	7.10714	1782.08	7.10714
1777.01	8.72147	8.72147			1783.08	7.10602	1783.08	7.10602
1778.01	8.72236	8.72236			1784.08	7.10603	1784.08	7.10603
1779.01	8.72325	8.72325			1785.09	7.10332	1785.09	7.10332
1780.01	8.72413	8.72413			1786.09	7.10641	1786.09	7.10641
1781.01	8.72501	8.72501			1787.09	7.10628	1787.09	7.10628
1782.01	8.72589	8.72589			1788.1	7.10581	1788.1	7.10581
1783.01	8.72676	8.72676			1789.1	7.1069	1789.1	7.1069
1784.01	8.72764	8.72764			1790.1	7.10512	1790.1	7.10512
1785.01	8.72852	8.72852			1791.1	7.10667	1791.1	7.10667
1786.01	8.72941	8.72941			1792.1	7.10611	1792.1	7.10611
1787.01	8.7303	8.7303			1793.1	7.11063	1793.1	7.11063
1788.01	8.7312	8.7312			1794.11	7.10654	1794.11	7.10654
1789.01	8.7321	8.7321			1795.11	7.10654	1795.11	7.10654
1790.01	8.733	8.733			1796.11	7.10844	1796.11	7.10844
1791.01	8.7339	8.7339			1797.11	7.11071	1797.11	7.11071
1792.01	8.73481	8.73481			1798.11	7.11019	1798.11	7.11019
1793.01	8.73571	8.73571			1799.11	7.10938	1799.11	7.10938
1794.01	8.73662	8.73662			1800.11	7.11027	1800.11	7.11027
1795.01	8.73755	8.73755			1801.12	7.1136	1801.12	7.1136
1796.01	8.73848	8.73848			1802.13	7.11332	1802.13	7.11332
1797.01	8.73944	8.73944			1803.13	7.11257	1803.13	7.11257
1798.01	8.74041	8.74041			1804.13	7.11608	1804.13	7.11608
1799.01	8.74141	8.74141			1805.13	7.11785	1805.13	7.11785
1800.01	8.74244	8.74244			1806.14	7.11784	1806.14	7.11784
1801.01	8.74349	8.74349			1807.14	7.11621	1807.14	7.11621
1802.01	8.74456	8.74456			1808.15	7.11572	1808.15	7.11572
1803.01	8.74565	8.74565			1809.16	7.11535	1809.16	7.11535
1804.01	8.74674	8.74674			1810.16	7.11602	1810.16	7.11602
1805.01	8.74785	8.74785			1811.17	7.11744	1811.17	7.11744
1806.01	8.74896	8.74896			1812.17	7.11697	1812.17	7.11697
1807.01	8.75007	8.75007			1813.17	7.11913	1813.17	7.11913
1808.01	8.75117	8.75117			1814.17	7.11892	1814.17	7.11892
1809.01	8.75227	8.75227			1815.17	7.11816	1815.17	7.11816
1810.01	8.75338	8.75338			1816.17	7.11986	1816.17	7.11986
1811.01	8.7545	8.7545			1817.17	7.12057	1817.17	7.12057
1812.01	8.75564	8.75564			1818.19	7.12055	1818.19	7.12055
1813.01	8.75677	8.75677			1819.19	7.12133	1819.19	7.12133
1814.01	8.7579	8.7579			1820.19	7.12383	1820.19	7.12383
1815.01	8.75903	8.75903			1821.2	7.12213	1821.2	7.12213
1816.01	8.76013	8.76013			1822.2	7.124	1822.2	7.124
1817.01	8.76122	8.76122			1823.2	7.12079	1823.2	7.12079
1818.01	8.76228	8.76228			1824.21	7.12412	1824.21	7.12412
1819.01	8.76331	8.76331			1825.21	7.12229	1825.21	7.12229
1820.01	8.7643	8.7643			1826.22	7.12665	1826.22	7.12665
1821.01	8.76526	8.76526			1827.22	7.1275	1827.22	7.1275
1822.01	8.76619	8.76619			1828.22	7.1254	1828.22	7.1254
1823.01	8.7671	8.7671			1829.22	7.12537	1829.22	7.12537
1824.01	8.768	8.768			1830.22	7.12775	1830.22	7.12775
1825.01	8.76889	8.76889			1831.24	7.12698	1831.24	7.12698
1826.01	8.76979	8.76979			1832.24	7.1289	1832.24	7.1289
1827.01	8.7707	8.7707			1833.24	7.12905	1833.24	7.12905
1828.01	8.77163	8.77163			1834.24	7.12905	1834.24	7.12905
1829.01	8.77258	8.77258			1835.24	7.13044	1835.24	7.13044
1830.01	8.77355	8.77355			1836.25	7.12772	1836.25	7.12772
1831.01	8.77452	8.77452			1837.25	7.13135	1837.25	7.13135
1832.01	8.7755	8.7755			1838.25	7.13032	1838.25	7.13032
1833.01	8.77649	8.77649			1839.26	7.13169	1839.26	7.13169
1834.01	8.77749	8.77749			1840.26	7.13166	1840.26	7.13166
1835.01	8.77849	8.77849			1841.27	7.13315	1841.27	7.13315
1836.01	8.77949	8.77949			1842.27	7.13365	1842.27	7.13365
1837.01	8.7805	8.7805			1843.27	7.13381	1843.27	7.13381
1838.01	8.78151	8.78151			1844.27	7.13512	1844.27	7.13512
1839.01	8.78253	8.78253			1845.27	7.13716	1845.27	7.13716
1840.01	8.78356	8.78356			1846.28	7.1355	1846.28	7.1355
1841.01	8.78459	8.78459			1847.29	7.13579	1847.29	7.13579
1842.01	8.78564	8.78564			1848.3	7.13459	1848.3	7.13459
1843.01	8.78669	8.78669			1849.3	7.13739	1849.3	7.13739
1844.01	8.78774	8.78774			1850.3	7.13735	1850.3	7.13735
1845.01	8.78879	8.78879			1851.31	7.1379	1851.31	7.1379
1846.01	8.78984	8.78984			1852.31	7.13598	1852.31	7.13598
1847.01	8.79088	8.79088			1853.31	7.13644	1853.31	7.13644
1848.01	8.7919	8.7919			1854.32	7.1389	1854.32	7.1389
1849.01	8.79291	8.79291			1855.32	7.13731	1855.32	7.13731
1850.01	8.79391	8.79391			1856.33	7.14047	1856.33	7.14047
1851.01	8.79488	8.79488			1857.33	7.13861	1857.33	7.13861
1852.01	8.79584	8.79584			1858.33	7.14048	1858.33	7.14048
1853.01	8.79679	8.79679			1859.33	7.13969	1859.33	7.13969
1854.01	8.79774	8.79774			1860.33	7.14104	1860.33	7.14104
1855.01	8.79869	8.79869			1861.34	7.14009	1861.34	7.14009
1856.01	8.79965	8.79965			1862.35	7.14405	1862.35	7.14405
1857.01	8.80063	8.80063			1863.35	7.144	1863.35	7.144
1858.01	8.80162	8.80162			1864.35	7.14222	1864.35	7.14222
1859.01	8.80264	8.80264			1865.35	7.14341	1865.35	7.14341
1860.01	8.80368	8.80368			1866.36	7.14495	1866.36	7.14495
1861.01	8.80474	8.80474			1867.36	7.14424	1867.36	7.14424
1862.01	8.80581	8.80581			1868.36	7.14328	1868.36	7.14328
1863.01	8.8069	8.8069			1869.36	7.14611	1869.36	7.14611
1864.01	8.808	8.808			1870.36	7.14446	1870.36	7.14446
1865.01	8.8091	8.8091			1871.38	7.1468	1871.38	7.1468
1866.01	8.8102	8.8102			1872.38	7.14776	1872.38	7.14776
1867.01	8.8113	8.8113			1873.38	7.14731	1873.38	7.14731
1868.01	8.81239	8.81239			1874.38	7.14808	1874.38	7.14808
1869.01	8.81347	8.81347			1875.38	7.14975	1875.38	7.14975
1870.01	8.81454	8.81454			1876.38	7.14854	1876.38	7.14854
1871.01	8.8156	8.8156			1877.38	7.14709	1877.38	7.14709
1872.01	8.81667	8.81667			1878.39	7.14863	1878.39	7.14863
1873.01	8.81773	8.81773			1879.39	7.14931	1879.39	7.14931
1874.01	8.81879	8.81879			1880.39	7.14814	1880.39	7.14814
1875.01	8.81984	8.81984			1881.41	7.14991	1881.41	7.14991
1876.01	8.8209	8.8209			1882.41	7.15014	1882.41	7.15014
1877.01	8.82196	8.82196			1883.41	7.15076	1883.41	7.15076
1878.01	8.82302	8.82302			1884.41	7.15177	1884.41	7.15177
1879.01	8.82408	8.82408			1885.41	7.15169	1885.41	7.15169
1880.01	8.82514	8.82514			1886.42	7.15434	1886.42	7.15434
1881.01	8.82621	8.82621			1887.42	7.15295	1887.42	7.15295
1882.01	8.82729	8.82729			1888.43	7.15412	1888.43	7.15412
1883.01	8.82836	8.82836			1889.43	7.1553	1889.43	7.1553
1884.01	8.82944	8.82944			1890.43	7.1557	1890.43	7.1557
1885.01	8.83051	8.83051			1891.44	7.15516	1891.44	7.15516
1886.01	8.83157	8.83157			1892.44	7.15602	1892.44	7.15602
1887.01	8.83262	8.83262			1893.44	7.15481	1893.44	7.15481
1888.01	8.83366	8.83366			1894.44	7.15607	1894.44	7.15607
1889.01	8.83469	8.83469			1895.44	7.15495	1895.44	7.15495
1890.01	8.83568	8.83568			1896.46	7.15486	1896.46	7.15486
1891.01	8.83664	8.83664			1897.46	7.15708	1897.46	7.15708
1892.01	8.83758	8.83758			1898.46	7.15835	1898.46	7.15835
1893.01	8.8385	8.8385			1899.46	7.15736	1899.46	7.15736
1894.01	8.83942	8.83942			1900.46	7.15873	1900.46	7.15873
1895.01	8.84036	8.84036			1901.47	7.15922	1901.47	7.15922
1896.01	8.84131	8.84131			1902.47	7.15939	1902.47	7.15939
1897.01	8.8423	8.8423			1903.47	7.16023	1903.47	7.16023
1898.01	8.84333	8.84333			1904.47	7.16169	1904.47	7.16169
1899.01	8.84441	8.84441			1905.47	7.16259	1905.47	7.16259
1900.01	8.84558	8.84558			1906.48	7.16128	1906.48	7.16128
1901.01	8.84682	8.84682			1907.48	7.16249	1907.48	7.16249
1902.01	8.84812	8.84812			1908.5	7.16238	1908.5	7.16238
1903.01	8.84945	8.84945			1909.5	7.16356	1909.5	7.16356
1904.01	8.8508	8.8508			1910.5	7.1646	1910.5	7.1646
1905.01	8.85214	8.85214			1911.5	7.16371	1911.5	7.16371
1906.01	8.85346	8.85346			1912.5	7.16356	1912.5	7.16356
1907.01	8.85473	8.85473			1913.51	7.1634	1913.51	7.1634
1908.01	8.85592	8.85592			1914.51	7.16443	1914.51	7.16443
1909.01	8.85703	8.85703			1915.51	7.16531	1915.51	7.16531
1910.01	8.85803	8.85803			1916.52	7.16521	1916.52	7.16521
1911.01	8.85895	8.85895			1917.52	7.16512	1917.52	7.16512
1912.01	8.85979	8.85979			1918.52	7.16584	1918.52	7.16584
1913.01	8.86058	8.86058			1919.52	7.16572	1919.52	7.16572
1914.01	8.86135	8.86135			1920.52	7.16738	1920.52	7.16738
1915.01	8.86211	8.86211			1921.53	7.1654	1921.53	7.1654
1916.01	8.86287	8.86287			1922.53	7.16707	1922.53	7.16707
1917.01	8.86367	8.86367			1923.53	7.16738	1923.53	7.16738
1918.01	8.86452	8.86452			1924.54	7.16692	1924.54	7.16692
1919.01	8.86543	8.86543			1925.54	7.16923	1925.54	7.16923
1920.01	8.86642	8.86642			1926.55	7.16879	1926.55	7.16879
1921.01	8.86745	8.86745			1927.55	7.17012	1927.55	7.17012
1922.01	8.86852	8.86852			1928.55	7.16778	1928.55	7.16778
1923.01	8.86961	8.86961			1929.55	7.17197	1929.55	7.17197
1924.01	8.87072	8.87072			1930.55	7.17184	1930.55	7.17184
1925.01	8.87185	8.87185			1931.55	7.17108	1931.55	7.17108
1926.01	8.87297	8.87297			1932.55	7.17113	1932.55	7.17113
1927.01	8.87409	8.87409			1933.55	7.17069	1933.55	7.17069
1928.01	8.8752	8.8752			1934.56	7.17269	1934.56	7.17269
1929.01	8.87628	8.87628			1935.56	7.17282	1935.56	7.17282
1930.01	8.87733	8.87733			1936.57	7.17144	1936.57	7.17144
1931.01	8.87837	8.87837			1937.57	7.17236	1937.57	7.17236
1932.01	8.87939	8.87939			1938.58	7.17131	1938.58	7.17131
1933.01	8.88041	8.88041			1939.58	7.17271	1939.58	7.17271
1934.01	8.88143	8.88143			1940.58	7.17287	1940.58	7.17287
1935.01	8.88245	8.88245			1941.6	7.17333	1941.6	7.17333
1936.01	8.88348	8.88348			1942.6	7.1732	1942.6	7.1732
1937.01	8.88453	8.88453			1943.6	7.17267	1943.6	7.17267
1938.01	8.88559	8.88559			1944.6	7.17591	1944.6	7.17591
1939.01	8.88668	8.88668			1945.6	7.17546	1945.6	7.17546
1940.01	8.88781	8.88781			1946.61	7.17544	1946.61	7.17544
1941.01	8.88898	8.88898			1947.61	7.17819	1947.61	7.17819
1942.01	8.89017	8.89017			1948.61	7.17694	1948.61	7.17694
1943.01	8.89138	8.89138			1949.61	7.1771	1949.61	7.1771
1944.01	8.8926	8.8926			1950.61	7.17816	1950.61	7.17816
1945.01	8.89382	8.89382			1951.61	7.17976	1951.61	7.17976
1946.01	8.89502	8.89502			1952.62	7.17987	1952.62	7.17987
1947.01	8.8962	8.8962			1953.62	7.17975	1953.62	7.17975
1948.01	8.89734	8.89734			1954.62	7.17745	1954.62	7.17745
1949.01	8.89844	8.89844			1955.62	7.17908	1955.62	7.17908
1950.01	8.89948	8.89948			1956.63	7.17896	1956.63	7.17896
1951.01	8.90045	8.90045			1957.63	7.18029	1957.63	7.18029
1952.01	8.90138	8.90138			1958.63	7.17883	1958.63	7.17883
1953.01	8.90229	8.90229			1959.63	7.18194	1959.63	7.18194
1954.01	8.90317	8.90317			1960.63	7.18109	1960.63	7.18109
1955.01	8.90406	8.90406			1961.64	7.18321	1961.64	7.18321
1956.01	8.90497	8.90497			1962.64	7.1832	1962.64	7.1832
1957.01	8.90592	8.90592			1963.64	7.18427	1963.64	7.18427
1958.01	8.90691	8.90691			1964.64	7.18339	1964.64	7.18339
1959.01	8.90797	8.90797			1965.64	7.18326	1965.64	7.18326
1960.01	8.90911	8.90911			1966.66	7.1848	1966.66	7.1848
1961.01	8.91033	8.91033			1967.66	7.18472	1967.66	7.18472
1962.01	8.91162	8.91162			1968.66	7.18319	1968.66	7.18319
1963.01	8.91295	8.91295			1969.66	7.18417	1969.66	7.18417
1964.01	8.91429	8.91429			1970.66	7.18418	1970.66	7.18418
1965.01	8.91564	8.91564			1971.66	7.18565	1971.66	7.18565
1966.01	8.91696	8.91696			1972.66	7.18743	1972.66	7.18743
1967.01	8.91825	8.91825			1973.66	7.18541	1973.66	7.18541
1968.01	8.91947	8.91947			1974.66	7.18791	1974.66	7.18791
1969.01	8.92061	8.92061			1975.66	7.18434	1975.66	7.18434
1970.01	8.92165	8.92165			1976.67	7.1842	1976.67	7.1842
1971.01	8.9226	8.9226			1977.67	7.1855	1977.67	7.1855
1972.01	8.92348	8.92348			1978.67	7.18673	1978.67	7.18673
1973.01	8.92431	8.92431			1979.67	7.18911	1979.67	7.18911
1974.01	8.92511	8.92511			1980.67	7.1892	1980.67	7.1892
1975.01	8.92591	8.92591			1981.69	7.1889	1981.69	7.1889
1976.01	8.92672	8.92672			1982.69	7.18841	1982.69	7.18841
1977.01	8.92757	8.92757			1983.69	7.18734	1983.69	7.18734
1978.01	8.92849	8.92849			1984.69	7.18972	1984.69	7.18972
1979.01	8.92948	8.92948			1985.69	7.18657	1985.69	7.18657
1980.01	8.93059	8.93059			1986.7	7.18905	1986.7	7.18905
1981.01	8.93181	8.93181			1987.7	7.19094	1987.7	7.19094
1982.01	8.93311	8.93311			1988.7	7.18805	1988.7	7.18805
1983.01	8.93446	8.93446			1989.71	7.19016	1989.71	7.19016
1984.01	8.93584	8.93584			1990.71	7.18782	1990.71	7.18782
1985.01	8.9372	8.9372			1991.71	7.18867	1991.71	7.18867
1986.01	8.93853	8.93853			1992.71	7.18986	1992.71	7.18986
1987.01	8.93978	8.93978			1993.71	7.19173	1993.71	7.19173
1988.01	8.94092	8.94092			1994.71	7.19175	1994.71	7.19175
1989.01	8.94194	8.94194			1995.71	7.1915	1995.71	7.1915
1990.01	8.94278	8.94278			1996.72	7.19251	1996.72	7.19251
1991.01	8.94347	8.94347			1997.72	7.19182	1997.72	7.19182
1992.01	8.94403	8.94403			1998.74	7.19204	1998.74	7.19204
1993.01	8.9445	8.9445			1999.74	7.18983	1999.74	7.18983
1994.01	8.94492	8.94492			2000.74	7.19449	2000.74	7.19449
1995.01	8.94532	8.94532			2001.74	7.1925	2001.74	7.1925
1996.01	8.94574	8.94574			2002.74	7.19226	2002.74	7.19226
[truncated: 334,453+ more rows]
