# Supplementary material
Source: publisher figshare collection journal article supplement (https://frontiersin.figshare.com/ndownloader/files/28396665)
Supplement: Supplementary file 2 [file 28396665 › Table 3.XLSX]

## Sheet: Table 3
Data for HH stage, allontois size and death. With significance testing for HH and size.
											Mann-Whitney U test for HH stage
											H0 = there is no difference between the ranks of the two groups
											H1 = there is a difference between the ranks of the two groups
											Tables for critical U values for various α levels:
											Mann-Whitney Table | Real Statistics Using Excel (real-statistics.com)
DATA
Day 2		a = control	b = perforated								WITHOUT DEAD
Control					Perforated						Group	All data	Rank		na	33
Egg no.	Diameter	HH stage	Comment		Egg no.	Diameter	HH stage	Comment			Control	12	15		nb	16
5	7.14	12	HH 11-12		6	4.65	11	Dead			Control	12	15		naxnb	528
9	8.11	12	HH 11-12		7	7.83	13	Dead			Control	12.5	18.5		na+1	34
4	9.44	12.5	HH 11-12		8	7.76	12	Dead			Control	12.5	18.5		nb+1	17
11	8.91	12.5	HH 11-12		9	5.66		Dead			Control	13	24		Middle term a	561
2	8.94	13	HH 13-14		12	6.2	12-	Dead			Control	13	24		Middle term b	136
3	8.75	13	HH 13-14		13	7.5	12	Dead			Control	13	24		Ra	1063.5
7	8.27	13	HH 13-14		16	7.03	12-	Dead			Control	13	24		Rb	161.5
8	9.57	13	HH 13-14		17	5.34	11+	Dead			Control	13	24
13	8.03	13	HH 13-14		18	5.26	8	Dead			Control	13	24		Ua	25.5
4	11.75	13	HH 13-14		19	6	8	Dead			Control	13	24		Ub	502.5
6	9.22	13	HH 13-14		20	3.68	8	Dead			Control	13	24
7	10.28	13	HH 13-14		15	unfertilized??	10	Dead			Control	13	24		Ustat	25.5
11	9.98	13	HH 13-14		2	8.45		Dead			Control	14	38.5
15	8.7	14	HH 13-14		3	8.01		Dead			Control	14	38.5			α = 0,05	α = 0,01	α = 0,001	two-tailed
16	9.72	14	HH 13-14		5	9.04		Dead			Control	14	38.5		Ucritical	171	144	113
18	9.77	14	HH 13-14		8	7.02		Dead			Control	14	38.5
19	8.9	14	HH 13-14		15	7.02		Dead			Control	14	38.5			SIGNIFICANT - our Ustat is smaller than the Ucritical, the null hypothesis is rejected.
12	7.79	14	HH 13-14		19	13.28		Dead			Control	14	38.5
2	15.86	14	HH 13-14		20	10.48		Dead			Control	14	38.5
3	10.69	14	HH 13-14		6	7.55		Deformed			Control	14	38.5
8	8.18	14	HH 13-14		1	10.91	12	Deformed, HH 11-12			Control	14	38.5
9	11.71	14	HH 13-14		1	5	11	HH 11-12			Control	14	38.5
10	13.42	14	HH 13-14		4	5.48	11	HH 11-12			Control	14	38.5
12	10.14	14	HH 13-14		14	5.63	11	HH 11-12			Control	14	38.5
13	10.93	14	HH 13-14		10	6.91	11	HH 11-12			Control	14	38.5
14	11.02	14	HH 13-14		3	5.31	12	HH 11-12			Control	14	38.5
15	10.2	14	HH 13-14		5	8.86	12	HH 11-12			Control	14	38.5
16	9.97	14	HH 13-14		10	9.93	11	HH 11-12			Control	14	38.5
17	9.39	14	HH 13-14		12	10.58	14	HH 13-14			Control	14	38.5
18	10.1	14	HH 13-14		2	4.62	10	HH 9-10			Control	14	38.5
19	11.03	14	HH 13-14		7	8.7	9	HH 9-10			Control	14	38.5
20	11.47	14	HH 13-14		11	7.1	10	HH 9-10			Control	14.5	49
20	10.33	14.5	HH 13-14		13	7.96	9	HH 9-10			Perforated	9	3
					14	6.66	9	HH 9-10			Perforated	9	3
					16	10.81	9	HH 9-10			Perforated	9	3
					18	7.53	9	HH 9-10			Perforated	9	3
											Perforated	9	3
											Perforated	10	6.5
											Perforated	10	6.5
											Perforated	11	10
											Perforated	11	10
											Perforated	11	10
											Perforated	11	10
											Perforated	11	10
											Perforated	12	15
											Perforated	12	15
											Perforated	12	15
											Perforated	14	38.5
Day 3		a = control	b = perforated								WITHOUT DEAD
Control					Perforated						Group	All data	Rank		na	23
Egg no.	Diameter	HH stage	Comment		Egg no.	Diameter	HH stage	Comment			Control	16	5.5		nb	5
1	21.93	16	HH 15-16		1	13.5	16	HH 15-16			Control	17	10		naxnb	115
4	21.21	17	HH 17-18		11	15.84	15	HH 15-16			Control	17	10		na+1	24
5	20.23	17	HH 17-18		21	13.61	14	HH 13-14			Control	17	10		nb+1	6
7	20.46	17	HH 17-18		25	12.38	15	HH 15-16			Control	17	10		Middle term a	276
11	20.96	17	HH 17-18		7	12.04	15	HH 15-16			Control	17	10		Middle term b	15
16	21	17	HH 17-18		10	8.09	14	dead			Control	17	10		Ra	390.5
18	20.57	17	HH 17-18		2	3.84		dead			Control	17	10		Rb	15.5
25	19.07	17	HH 17-18		3	7.23		dead			Control	17.5	14
2	19.12	17.5	HH 17-18		4	10.94		dead			Control	18	21.5		Ua	0.5
3	21.04	18	HH 17-18		5			dead			Control	18	21.5		Ub	114.5
6	18.08	18	HH 17-18		6	9.88		dead			Control	18	21.5
8	23.08	18	HH 17-18		8	11.14		dead			Control	18	21.5		Ustat	0.5
9	19.91	18	HH 17-18		9			dead			Control	18	21.5
10	20.14	18	HH 17-18		12	5.31		dead			Control	18	21.5			α = 0,05	α = 0,01	α = 0,001
13	21.28	18	HH 17-18		14	4		dead			Control	18	21.5		Ucritical	24	15	7
14	21.61	18	HH 17-18		15	7.22		dead			Control	18	21.5
15	22.33	18	HH 17-18		16	7.79		dead			Control	18	21.5			SIGNIFICANT - our Ustat is smaller than the Ucritical, the null hypothesis is rejected.
20	20.72	18	HH 17-18		17			dead			Control	18	21.5
26	20.75	18	HH 17-18		22			dead			Control	18	21.5
27	19.97	18	HH 17-18		26			dead			Control	18	21.5
28	21.53	18	HH 17-18		27			dead			Control	18	21.5
29	19.8	18	HH 17-18		28	9.39		dead			Control	18	21.5
30	19.43	18	HH 17-18		29	9.65		dead			Perforated	14	1
					30	10.02		dead			Perforated	15	3
											Perforated	15	3
											Perforated	15	3
											Perforated	16	5.5
Day 4		a = control	b = perforated								WITHOUT DEAD
Control						Perforated					Group	All data	Rank		na	14
Egg no.	Diameter	HH stage	Comment			Egg no.	Diameter	HH stage	Comment		Control	20	7.5		nb	9
4	30.03	20	HH 19-20			5	27.15	21	HH 21-22		Control	20	7.5		naxnb	126
6	28.39	20	HH 19-20			6	25.7	20	HH 19-20		Control	20	7.5		na+1	15
8	28.27	20	HH 19-20			8	24.69	20	HH 19-20		Control	20	7.5		nb+1	10
16	29.16	20	HH 19-20			11	30.53	20	HH 19-20		Control	20	7.5		Middle term a	105
20	25.04	20	HH 19-20			19	25.28	20	HH 19-20		Control	20.5	14		Middle term b	45
14	28.97	20.5	HH 19-20			9	23.18	20	HH 19-20		Control	21	19		Ra	203.5
1	28.83	21	HH 21-22			4	26.4	20	HH 19-20		Control	21	19		Rb	72.5
3	27.71	21	HH 21-22			12	25.42	19	HH 19-20		Control	21	19
7	29.06	21	HH 21-22			10	28.36	20	HH 19-20		Control	21	19		Ua	27.5
10	26.41	21	HH 21-22			13	15.65		Dead		Control	21	19		Ub	98.5
11	29.17	21	HH 21-22			14	20.73		Dead		Control	21	19
12	28.19	21	HH 21-22			15	11.32		Dead		Control	21	19		Ustat	27.5
18	28.96	21	HH 21-22			18	22.96		Dead		Control	21	19
19	32.5	21	HH 21-22			20	20.06		Dead, deformed		Perforated	19	1			α = 0,05	α = 0,01	α = 0,001	two-tailed
2	17.92		Dead			3	.	.	Dead, deformed, odd blood system		Perforated	20	7.5		Ucritical	31	22	13
5	17.86		Dead			16	23.13		Deformed		Perforated	20	7.5
13	19.12		Dead			17	26.32		Deformed		Perforated	20	7.5			SIGNIFICANT - our Ustat is smaller than the Ucritical, the null hypothesis is rejected.
15	20.84		Dead			7	25.68		Deformed, barely alive(?)		Perforated	20	7.5
17	21.26		Dead			1	15.1		Deformed, odd blood system		Perforated	20	7.5
						2	10.39		Deformed, odd blood system		Perforated	20	7.5
											Perforated	20	7.5
											Perforated	21	19
Day 5		a = control	b = perforated								WITHOUT DEAD
Control						Perforated					Group	All data	Rank		na	16
Egg no.	Diameter	HH stage	Comment			Egg no.	Diameter	HH stage	Comment		Control	27	10		nb	11
1		27	HH 27-28			4		26	HH 25-26		Control	28	15		naxnb	176
2		28	HH 27-28			6		26	HH 25-26		Control	28	15		na+1	17
6		28	HH 27-28			8		26	HH 25-26		Control	28	15		nb+1	12
8		28	HH 27-28			10		26	HH 25-26		Control	28	15		Middle term a	136
9		28	HH 27-28			15		26	HH 25-26		Control	28	15		Middle term b	66
12		28	HH 27-28			18		26	HH 25-26		Control	28.5	18		Ra	310
3		28.5	HH 27-28			20		26	HH 25-26		Control	29	23		Rb	68
4		29	HH 29-30			5		27	HH 27-28		Control	29	23
5		29	HH 29-30			7		27	HH 27-28		Control	29	23		Ua	2
7		29	HH 29-30			16		27	HH 27-28		Control	29	23		Ub	174
13		29	HH 29-30			19		27	HH 27-28		Control	29	23
15		29	HH 29-30			1			Dead		Control	29	23		Ustat	2
17		29	HH 29-30			2			Dead		Control	29	23
18		29	HH 29-30			3			Dead		Control	29	23			α = 0,05	α = 0,01	α = 0,001	two-tailed
19		29	HH 29-30			9			Deformed, weak		Control	29	23		Ucritical	47	36	24
20		29	HH 29-30			11			Dead, small		Perforated	26	4
11		Dead	Dead			12			Dead		Perforated	26	4			SIGNIFICANT - our Ustat is smaller than the Ucritical, the null hypothesis is rejected.
						13			Dead		Perforated	26	4
						14			Deformed, weak		Perforated	26	4
						17			Dead		Perforated	26	4
											Perforated	26	4
											Perforated	26	4
											Perforated	27	10
											Perforated	27	10
											Perforated	27	10
											Perforated	27	10
Welch 's t-test for allontois size
Same eggs as for the
	Day 2					Day 3				Day 4
	t-Test: Two-Sample Assuming Unequal Variances					t-Test: Two-Sample Assuming Unequal Variances				t-Test: Two-Sample Assuming Unequal Variances
		Control	Perforated				Control	Perforated			Control	Perforated
	Mean	9.93061	7.62437			Mean	20.6183	13.474		Mean	28.6207	26.3011
	Variance	2.90411	4.62411			Variance	1.28531	2.21758		Variance	2.84625	4.67129
	Observations	33	16			Observations	23	5		Observations	14	9
	Hypothesized Mean Difference	0				Hypothesized Mean Difference	0			Hypothesized Mean Difference	0
	df	24				df	5			df	14
	t Stat	3.75601				t Stat	10.1096			t Stat	2.72926
	P(T<=t) one-tail	0.000486887				P(T<=t) one-tail	8.1119e-05			P(T<=t) one-tail	0.00814752
	t Critical one-tail	1.71088				t Critical one-tail	2.01505			t Critical one-tail	1.76131
	P(T<=t) two-tail	0.000973774				P(T<=t) two-tail	0.000162238			P(T<=t) two-tail	0.016295
	t Critical two-tail	2.0639				t Critical two-tail	2.57058			t Critical two-tail	2.14479
		α = 0,001					α = 0,001				α = 0,05
											Note: with the Student's t-test (equal variances) we get below α = 0,01 for day 4.
Non-parametric Mann-Whitney U test for allontois size:
	In summary: same level of significance for each day as with the Welch's t-test!
Day 2
	WITHOUT DEAD
	Group	All data	Rank		na	33
	Control	7.14	9		nb	16
	Control	7.79	11		naxnb	528
	Control	8.03	13		na+1	34
	Control	8.11	14		nb+1	17
	Control	8.18	15		Middle term a	561
	Control	8.27	16		Middle term b	136
	Control	8.7	17.5		Ra	980.5
	Control	8.75	19		Rb	244.5
	Control	8.9	21
	Control	8.91	22		Ua	108.5
	Control	8.94	23		Ub	419.5
	Control	9.22	24
	Control	9.39	25		Ustat	108.5
	Control	9.44	26
	Control	9.57	27			α = 0,05	α = 0,01	α = 0,001	two-tailed
	Control	9.72	28		Ucritical	171	144	113
	Control	9.77	29
	Control	9.97	31		SIGNIFICANT - our Ustat is smaller than the Ucritical, the null hypothesis is rejected.
	Control	9.98	32
	Control	10.1	33
	Control	10.14	34
	Control	10.2	35
	Control	10.28	36
	Control	10.33	37
	Control	10.69	39
	Control	10.93	42
	Control	11.02	43
	Control	11.03	44
	Control	11.47	45
	Control	11.71	46
	Control	11.75	47
	Control	13.42	48
	Control	15.86	49
	Perforated	4.62	1
	Perforated	5	2
	Perforated	5.31	3
	Perforated	5.48	4
	Perforated	5.63	5
	Perforated	6.66	6
	Perforated	6.91	7
	Perforated	7.1	8
	Perforated	7.53	10
	Perforated	7.96	12
	Perforated	8.7	17.5
	Perforated	8.86	20
	Perforated	9.93	30
	Perforated	10.58	38
	Perforated	10.81	40
	Perforated	10.91	41
Day 3
	WITHOUT DEAD
	Group	All data	Rank		na	23
	Control	18.08	6		nb	5
	Control	19.07	7		naxnb	115
	Control	19.12	8		na+1	24
	Control	19.43	9		nb+1	6
	Control	19.8	10		Middle term a	276
	Control	19.91	11		Middle term b	15
	Control	19.97	12		Ra	391
	Control	20.14	13		Rb	15
	Control	20.23	14
	Control	20.46	15		Ua	0
	Control	20.57	16		Ub	115
	Control	20.72	17
	Control	20.75	18		Ustat	0
	Control	20.96	19
	Control	21	20			α = 0,05	α = 0,01	α = 0,001	two-tailed
	Control	21.04	21		Ucritical	24	15	7
	Control	21.21	22
	Control	21.28	23		SIGNIFICANT - our Ustat is smaller than the Ucritical, the null hypothesis is rejected.
	Control	21.53	24
	Control	21.61	25
	Control	21.93	26
	Control	22.33	27
	Control	23.08	28
	Perforated	12.04	1
	Perforated	12.38	2
	Perforated	13.5	3
	Perforated	13.61	4
	Perforated	15.84	5
Day 4
	WITHOUT DEAD
	Group	All data	Rank		na	14
	Control	25.04	3		nb	9
	Control	26.41	8		naxnb	126
	Control	27.71	10		na+1	15
	Control	28.19	11		nb+1	10
	Control	28.27	12		Middle term a	105
	Control	28.39	14		Middle term b	45
	Control	28.83	15		Ra	207
	Control	28.96	16		Rb	69
	Control	28.97	17
	Control	29.06	18		Ua	24
	Control	29.16	19		Ub	102
	Control	29.17	20
	Control	30.03	21		Ustat	24
	Control	32.5	23
	Perforated	23.18	1			α = 0,05	α = 0,01	α = 0,001	two-tailed
	Perforated	24.69	2		Ucritical	31	22	13
	Perforated	25.28	4
	Perforated	25.42	5		SIGNIFICANT - our Ustat is smaller than the Ucritical, the null hypothesis is rejected.
	Perforated	25.7	6
	Perforated	26.4	7
	Perforated	27.15	9
	Perforated	28.36	13
	Perforated	30.53	22
