# Supplementary material
Source: publisher figshare collection journal article supplement (https://frontiersin.figshare.com/ndownloader/files/28396665)
Supplement: Supplementary file 2 [file 28396665 › Table 4.XLSX]

## Sheet: Table 4
1 day, 10% O2 - control vs opened - allontois size												1 day, 10% O2 - control vs opened - HH stage
	Group	All data	Rank		na	1							Group	All data	Rank		na	1
	Control	5.62	2		nb	1							Control	4	12		nb	1
	Control	7.95	4		naxnb	1							Control	4	12		naxnb	1
	Control	9.43	9		na+1	2							Control	4	12		na+1	2
	Control	9.95	12		nb+1	2							Control	4	12		nb+1	2
	Control	10.65	17		Middle term a	1							Control	4	12		Middle term a	1
	Control	10.8	20		Middle term b	1							Control	4	12		Middle term b	1
	Control	11.11	22		Ra	446							Control	4	12		Ra	405
	Control	11.31	23		Rb	220							Control	4	12		Rb	261
	Control	11.33	24										Control	4	12
	Control	11.56	26		Ua	-444							Control	5	29		Ua	-403
	Control	11.59	27		Ub	-218							Control	5	29		Ub	-259
	Control	11.66	29										Control	5	29
	Control	11.82	30		Ustat	-444							Control	5	29		Ustat	-403
	Control	12.04	31										Control	5	29
	Control	12.19	32			α = 0,05	α = 0,01	α = 0,001	two-tailed				Control	5	29			α = 0,05	α = 0,01	α = 0,001	two-tailed
	Control	12.28	33		Ucritical	99	81	60					Control	5	29		Ucritical	99	81	60
	Control	12.31	34										Control	5	29
	Control	12.78	35		SIGNIFICANT - our Ustat is smaller than the Ucritical, the null hypothesis is rejected.								Control	5	29		NOT SIGNIFICANT - our Ustat is larger than the Ucritical, the null hypothesis is rejected.
	Control	15.86	36		Allontois size of Controls ranks higher than the Opened								Control	6	36		HH stage of Controls ranks the same as Opened
	Opened	5.5	1										Opened	3	1
	Opened	6.39	3										Opened	4	12		.--> significant with alpha = 0.1 (Ucritical = 109)
	Opened	8.26	5										Opened	4	12
	Opened	8.42	6										Opened	4	12
	Opened	8.6	7										Opened	4	12
	Opened	9.2	8										Opened	4	12
	Opened	9.7	10.5										Opened	4	12
	Opened	9.7	10.5										Opened	4	12
	Opened	10.2	13										Opened	4	12
	Opened	10.21	14										Opened	4	12
	Opened	10.33	15										Opened	4	12
	Opened	10.49	16										Opened	4	12
	Opened	10.73	18										Opened	4	12
	Opened	10.77	19										Opened	5	29
	Opened	10.98	21										Opened	5	29
	Opened	11.43	25										Opened	5	29
	Opened	11.6	28										Opened	5	29
3 days, 40% O2 control vs 21% perforated - allontois size												3 days. 40% O2 control vs 21% perforated - HH stage
Data for perforated eggs from the "normoxia" experiments:
Perforated
Diameter	HH stage
13.5	16
15.84	15
13.61	14
12.38	15
12.04	15
	Group	All data	Rank		na	14							Group	All data	Rank		na	14
	Control	13.2	3		nb	5							Control	10	1		nb	5
	Control	15.11	6		naxnb	70							Control	12	2		naxnb	70
	Control	16.09	8		na+1	15							Control	14	5		na+1	15
	Control	16.78	9		nb+1	6							Control	14	5		nb+1	6
	Control	17	10		Middle term a	105							Control	14	5		Middle term a	105
	Control	17.97	11		Middle term b	15							Control	14	5		Middle term b	15
	Control	18.57	12		Ra	171							Control	15	10		Ra	140.5
	Control	19.07	13		Rb	19							Control	15	10		Rb	49.5
	Control	19.25	14										Control	16	14.5
	Control	19.51	15		Ua	4							Control	16	14.5		Ua	34.5
	Control	20.19	16		Ub	66							Control	16	14.5		Ub	35.5
	Control	20.46	17										Control	17	17
	Control	21.3	18		Ustat	4							Control	18	18.5		Ustat	34.5
	Control	23.64	19										Control	18	18.5
	Perforated	12.04	1			α = 0,05	α = 0,01	α = 0,001	two-tailed				Perforated	14	5			α = 0,05	α = 0,01	α = 0,001	two-tailed
	Perforated	12.38	2		Ucritical	13	7	2					Perforated	15	10		Ucritical	13	7	2
	Perforated	13.5	4										Perforated	15	10
	Perforated	13.61	5		SIGNIFICANT - our Ustat is smaller than the Ucritical, the null hypothesis is rejected.								Perforated	15	10		NOT SIGNIFICANT - our Ustat is larger than the Ucritical, the null hypothesis is rejected.
	Perforated	15.84	7		Allontois size of Controls ranks higher than the Perforated								Perforated	16	14.5		HH stage of Controls ranks the same as Perforated
3 days, 40% O2 control vs 21% control - allontois size													3 days, 40% O2 control vs 21% control - HH stage
Data for 21% control eggs from the "normoxia" experiments:
21% control
Diameter	HH stage
21.93	16
21.21	17
20.23	17
20.46	17
20.96	17
21	17
20.57	17
19.07	17
19.12	17.5
21.04	18
18.08	18
23.08	18
19.91	18
20.14	18
21.28	18
21.61	18
22.33	18
20.72	18
20.75	18
19.97	18
21.53	18
19.8	18
19.43	18
	Group	All data	Rank		na	14							Group	All data	Rank		na	14
	40% Control	13.2	1		nb	23							40% Control	10	1		nb	23
	40% Control	15.11	2		naxnb	322							40% Control	12	2		naxnb	322
	40% Control	16.09	3		na+1	15							40% Control	14	4.5		na+1	15
	40% Control	16.78	4		nb+1	24							40% Control	14	4.5		nb+1	24
	40% Control	17	5		Middle term a	105							40% Control	14	4.5		Middle term a	105
	40% Control	17.97	6		Middle term b	276							40% Control	14	4.5		Middle term b	276
	40% Control	18.57	8		Ra	173							40% Control	15	7.5		Ra	143
	40% Control	19.07	9.5		Rb	530							40% Control	15	7.5		Rb	560
	40% Control	19.25	12										40% Control	16	10.5
	40% Control	19.51	14		Ua	254							40% Control	16	10.5		Ua	284
	40% Control	20.19	19		Ub	68							40% Control	16	10.5		Ub	38
	40% Control	20.46	21.5										40% Control	17	16.5
	40% Control	21.3	31		Ustat	68							40% Control	18	29.5		Ustat	38
	40% Control	23.64	37										40% Control	18	29.5
	21% Control	18.08	7			α = 0,05	α = 0,01	α = 0,001	two-tailed				21% Control	16	10.5			α = 0,05	α = 0,01	α = 0,001
	21% Control	19.07	9.5		Ucritical	98	79	59					21% Control	17	16.5		Ucritical	98	79	59
	21% Control	19.12	11										21% Control	17	16.5
	21% Control	19.43	13		SIGNIFICANT - our Ustat is smaller than the Ucritical, the null hypothesis is rejected.								21% Control	17	16.5		SIGNIFICANT - our Ustat is smaller than the Ucritical, the null hypothesis is rejected.
	21% Control	19.8	15		Allontois size of 21% Controls ranks higher than the 40% Controls								21% Control	17	16.5		HH stage of 21% Controls ranks higher than the 40% Controls
	21% Control	19.91	16										21% Control	17	16.5
	21% Control	19.97	17										21% Control	17	16.5
	21% Control	20.14	18										21% Control	17	16.5
	21% Control	20.23	20										21% Control	17.5	21
	21% Control	20.46	21.5										21% Control	18	29.5
	21% Control	20.57	23										21% Control	18	29.5
	21% Control	20.72	24										21% Control	18	29.5
	21% Control	20.75	25										21% Control	18	29.5
	21% Control	20.96	26										21% Control	18	29.5
	21% Control	21	27										21% Control	18	29.5
	21% Control	21.04	28										21% Control	18	29.5
	21% Control	21.21	29										21% Control	18	29.5
	21% Control	21.28	30										21% Control	18	29.5
	21% Control	21.53	32										21% Control	18	29.5
	21% Control	21.61	33										21% Control	18	29.5
	21% Control	21.93	34										21% Control	18	29.5
	21% Control	22.33	35										21% Control	18	29.5
	21% Control	23.08	36										21% Control	18	29.5
