# Supplementary material
Source: publisher figshare collection journal article supplement (https://frontiersin.figshare.com/ndownloader/files/28396665)
Supplement: Supplementary file 2 [file 28396665 › Table 6.XLSX]

## Sheet: Table 6
Egg parameters and weight loss over time
EXP 6
Egg Weight [g]						WeightLoss [g]				Molar Loss [moles]				D_H2O-Air [m^2/s]
Egg #	2020-07-27 12:28:00	2020-07-28 11:46:00	2020-07-29 12:51:00	2020-07-28 09:33:00		2020-07-27 12:28:00 - 2020-07-28 11:46:00	2020-07-28 11:46:00 - 2020-07-29 12:51:00	2020-07-29 12:51:00 - 2020-07-28 09:33:00										mean D_H2O-Air [m^2/s]	mean D_O2-Air [m^2/s]	Egg Area [m^2]	Width [mm]	Total Height [mm]	Blunt Height [mm]	Shell Thickness[mm]	Aircell Volume [cm^3]
1	60.9425	60.3989	59.7912	59.2909		0.5436	0.6077	0.5003		0.0301749	0.033733	0.0277713		1.11887e-08	1.05788e-08	1.04917e-08		1.07363e-08	1.04e-08	0.00721642	43.99	56.04	27	0.38	2.2
2	60.859	60.2531	59.594	59.0513		0.6059	0.6591	0.5427		0.0336331	0.0365862	0.0301249		1.29965e-08	1.19571e-08	1.18604e-08		1.22461e-08	1.18626e-08	0.00728911	43.84	57.11	27	0.4	2.1
3	57.3523	56.932	56.4733	56.0965		0.4203	0.4587	0.3768		0.0233306	0.0254621	0.0209159		9.52541e-09	8.79229e-09	8.70066e-09		8.98862e-09	8.70711e-09	0.00689881	43.59	53.55	25	0.4	2
4	64.7129	64.1978	63.618	63.1404		0.5151	0.5798	0.4776		0.0285928	0.0321843	0.0265112		1.35089e-08	1.28605e-08	1.27618e-08		1.30247e-08	1.26168e-08	0.00745211	44.09	58.22	26	0.5	1.9
5	63.2187	62.6187	61.9473	61.3911		0.6	0.6714	0.5562		0.0333056	0.0372689	0.0308743		1.30306e-08	1.23323e-08	1.23073e-08		1.25356e-08	1.2143e-08	0.00737917	44.33	56.99	27	0.41	2.3
6	62.3818	61.835	61.2333	60.7336		0.5468	0.6017	0.4997		0.0303525	0.0333999	0.027738		1.45427e-08	1.35346e-08	1.35408e-08		1.38445e-08	1.34109e-08	0.00734837	43.49	58.49	28	0.5	2
7	67.6169	67.0817	66.4966	66.0143		0.5352	0.5851	0.4823		0.0297086	0.0324785	0.0267721		1.13606e-08	1.05043e-08	1.04309e-08		1.07439e-08	1.04074e-08	0.00773394	45.62	57.85	29	0.42	1.9
8	59.8195	59.3378	58.7891	58.3355		0.4817	0.5487	0.4536		0.0267388	0.030458	0.025179		1.09116e-08	1.05123e-08	1.04689e-08		1.06168e-08	1.02843e-08	0.00707473	42.34	58.12	28	0.41	2
9	62.7669	62.2686	61.7068	61.2411		0.4983	0.5618	0.4657		0.0276603	0.0311851	0.0258507		1.15368e-08	1.10008e-08	1.09855e-08		1.11568e-08	1.08074e-08	0.00725959	43.66	57.19	27	0.43	2
10	56.7471	56.3944	56.0025	55.6766		0.3527	0.3919	0.3259		0.0195781	0.0217541	0.0180905		7.62834e-09	7.16884e-09	7.18168e-09		7.31239e-09	7.08338e-09	0.00686748	43	54.48	26	0.38	1.3
Average Aircell Volume [m^3]	4.2537e-07	9.3533e-07	1.50192e-06	1.97e-06
11	61.3393	60.8318	60.2763			0.5075	0.5555			0.028171	0.0308354			9.59503e-09	8.88267e-09			9.22433e-09	8.93544e-09	0.00723596	43.25	57.84	28	0.35	1.5
12	56.5541	56.0664	55.5296			0.4877	0.5368			0.0270719	0.0297974			1.08741e-08	1.01228e-08			1.04844e-08	1.0156e-08	0.00666167	42.22	53.94	26	0.38	1.4
13	58.4745	57.5932	56.5706			0.8813	1.0226			0.0489203	0.0567638			1.66282e-08	1.63184e-08			1.64876e-08	1.59713e-08	0.0070436	42.87	56.63	27	0.34	2.7
14	61.553	60.974	60.2202			0.579	0.7538			0.0321399	0.0418429			1.20514e-08	1.32698e-08			1.27325e-08	1.23338e-08	0.00732393	43.12	58.99	26	0.39	1.5
15	60.1127	59.5544	58.917			0.5583	0.6374			0.0309908	0.0353816			1.25029e-08	1.20727e-08			1.22901e-08	1.19052e-08	0.00715616	44.2	54.96	26	0.41	1.6
16	58.6075	58.1509	57.6612			0.4566	0.4897			0.0253455	0.0271829			1.00144e-08	9.08377e-09			9.52592e-09	9.22758e-09	0.00695051	44.04	53.15	25	0.39	1.2
17	58.7613	58.2001	57.5699			0.5612	0.6302			0.0311518	0.034982			1.1239e-08	1.06743e-08			1.09512e-08	1.06082e-08	0.00702634	43.36	55.4	27	0.36	1.7
18	58.5175	58.0887	57.6204			0.4288	0.4683			0.0238024	0.025995			9.64729e-09	8.91094e-09			9.26366e-09	8.97353e-09	0.00700885	42.84	56.31	26		1.3
19	58.9621	58.5686	57.1403			0.3935	1.4283			0.0218429	0.0792839			7.82657e-09	7.20483e-09			7.50212e-09	7.26716e-09	0.0070748	44.1	54.31	25	0.36	1.2
20	61.7716	61.3732	60.9213			0.3984	0.4519			0.0221149	0.0250847			6.54514e-09	6.27901e-09			6.41155e-09	6.21075e-09	0.00737565	44.15	57.35	28	0.31	1.3
Average Aircell Volume [m^3]	4.1732e-07	9.4255e-07	1.54e-06
21	64.4999	63.9179				0.582				0.0323064				1.18174e-08				1.18174e-08	1.14473e-08	0.00750766	44.47	58	27	0.39	0.8
22	61.4635	60.927				0.5365				0.0297807				1.09674e-08				1.09674e-08	1.06239e-08	0.0072659	43.68	57.19	26	0.38	0.8
23	55.3066	54.8782				0.4284				0.0237802				1.0038e-08				1.0038e-08	9.7236e-09	0.00667271	42.37	53.74	26	0.4	0.6
24	62.8984	62.3955				0.5029				0.0279156				1.04289e-08				1.04289e-08	1.01023e-08	0.00735099	44.47	56.41	27.5	0.39	0.7
25	64.8316	64.2667				0.5649				0.0313572				1.14752e-08				1.14752e-08	1.11159e-08	0.00750435	44.93	57	28	0.39	0.8
26	60.9044	60.4169				0.4875				0.0270608				1.03467e-08				1.03467e-08	1.00227e-08	0.00718248	43.65	56.42	28	0.39	0.7
27	62.4902	62.026				0.4642				0.0257674				1.06366e-08				1.06366e-08	1.03035e-08	0.00733517	44.76	55.63	27	0.43	0.7
28	56.0311	55.642				0.3891				0.0215987				7.81666e-09				7.81666e-09	7.57185e-09	0.00681	43.59	52.62	25	0.35	0.5
29	62.5346	61.9967				0.5379				0.0298585				1.19298e-08				1.19298e-08	1.15562e-08	0.00722586	43.99	56.12	26	0.41	0.7
30	65.1556	64.5386				0.617				0.0342492								1.29004e-08	1.24964e-08	0.0074779	45.45	55.63	28	0.4
Average Aircell Volume [m^3]	2.00733e-07	7e-07
31	57.6958																				43.58	53.48	24	0.44	0.4
32	61.5049																				45.34	53.21	24.5	0.4	0.5
33	63.85																				44.75	56.57	27.5	0.42	0.6
34	60.7078																				43.33	56.83	28	0.44	0.6
35	60.152																				43.9	55.75	26	0.45	0.6
36	61.1985																				43.39	58.03	28	0.5	0.6
37	62.1501																				43.64	57.32	27.5
38	62.2133																				43.78	58.23	27.5	0.4	0.6
39	58.4739																				43.01	55.65	26	0.4	0.6
40	58.403																				43.61	54.47	26	0.43	0.6
Average Aircell Volume [m^3]	5.66667e-07
EXP 7
Egg Weight [g]							Weightloss [g]					moles lost [moles]					D_H2O-Air [m^2/s]
Egg #	2020-08-03 09:47:00	2020-08-04 10:53:00	2020-08-05 10:54:00	2020-08-06 10:48:00	2020-08-07 09:29:00		2020-08-03 09:47:00 - 2020-08-04 10:53:00	2020-08-04 10:53:00 - 2020-08-05 10:54:00	2020-08-05 10:54:00 - 2020-08-06 10:48:00	2020-08-06 10:48:00 - 2020-08-07 09:29:00		2020-08-03 09:47:00 - 2020-08-04 10:53:00	2020-08-04 10:53:00 - 2020-08-05 10:54:00	2020-08-05 10:54:00 - 2020-08-06 10:48:00	2020-08-06 10:48:00 - 2020-08-07 09:29:00		2020-08-03 09:47:00 - 2020-08-04 10:53:00	2020-08-04 10:53:00 - 2020-08-05 10:54:00	2020-08-05 10:54:00 - 2020-08-06 10:48:00	2020-08-06 10:48:00 - 2020-08-07 09:29:00		mean D_H2O-Air [m^2/s]	mean D_O2-Air [m^2/s]	Egg Area [m^2]	Width [mm]	Tot Height[mm]	c [mm]	Aircell Volume[cm^3]	ShellThickness[mm]
1	58.4815	57.9215	57.4423	56.9902	56.5571		0.56	0.4792	0.4521	0.4331		0.0344213	0.0298418	0.0282986	0.0270219		1.16479e-08	1.03645e-08	1.01361e-08	1.02266e-08		1.06126e-08	1.02802e-08	0.00694111	43.77	54.44	30		0.44	Missing volume, Not included
2	58.2344	57.6143	57.0767	56.5669	56.0801		0.6201	0.5376	0.5098	0.4868		0.0255232	0.0232528	0.0219151	0.0209437		8.70592e-09	8.1406e-09	7.91235e-09	7.98961e-09		8.19725e-09	7.94052e-09	0.00692909	43.88	53.37	29	2.5	0.4
3	57.7375	57.2777	56.8588	56.464	56.0867		0.4598	0.4189	0.3948	0.3773		0.03068	0.0266389	0.0251735	0.0242243		1.07426e-08	9.57352e-09	9.32997e-09	9.48634e-09		9.79975e-09	9.49283e-09	0.00687574	42.83	55.48	30	2	0.4025	Missing Averaged
4	56.738	56.1853	55.7054	55.2519	54.8155		0.5527	0.4799	0.4535	0.4364		0.0293311	0.0255842	0.0259561	0.0215265		1.08047e-08	9.67292e-09	1.01206e-08	8.86853e-09		9.89246e-09	9.58264e-09	0.00717328	42.22	56.21	31	2.2	0.41
5	59.2841	58.7557	58.2948	57.8272	57.4394		0.5284	0.4609	0.4676	0.3878		0.0344324	0.0304913	0.0288648	0.027516		1.18537e-08	1.07736e-08	1.05181e-08	1.05941e-08		1.09519e-08	1.06089e-08	0.00699341	43.31	56.99	32	2.1	0.45
6	58.5542	57.9339	57.3846	56.8646	56.3689		0.6203	0.5493	0.52	0.4957		0.0377019	0.0343603	0.032917	0.0314127		1.11007e-08	1.03835e-08	1.02587e-08	1.0344e-08		1.05318e-08	1.0202e-08	0.00698024	44	53.67	29	2.5	0.41
7	57.9999	57.3207	56.7017	56.1087	55.5428		0.6792	0.619	0.593	0.5659		0.0297141	0.0255176	0.0242021	0.0230974		9.12948e-09	8.04681e-09	7.87078e-09	7.9367e-09		8.26166e-09	8.00291e-09	0.00707146	43.06	55.53	30	2.8	0.35
8	58.5246	57.9893	57.5296	57.0936	56.6775		0.5353	0.4597	0.436	0.4161		0.0340661	0.0299528	0.0285928	0.0271996		1.23528e-08	1.11476e-08	1.09744e-08	1.10306e-08		1.13938e-08	1.1037e-08	0.00680137	43.33	55.89	31	2	0.37
9	55.5991	54.9854	54.4458	53.9307	53.4407		0.6137	0.5396	0.5151	0.49		0.0319567	0.028232	0.0268221	0.0257119		1.12465e-08	1.01976e-08	9.99152e-09	1.01201e-08		1.04039e-08	1.00781e-08	0.00700782	43.09	53.53	30	2.4	0.42
10	56.8924	56.3167	55.8081	55.3249	54.8617		0.5757	0.5086	0.4832	0.4632		0.0285873	0.0243408	0.0229309	0.0218818		9.31504e-09	8.14043e-09	7.90888e-09	7.97421e-09		8.35248e-09	8.09089e-09	0.00666776	42.3	57.49	30	2.3	0.42
11	55.295	54.78	54.3415	53.9284	53.5342		0.515	0.4385	0.4131	0.3942		0.0291479	0.0262559	0.025018	0.0239856		1.06335e-08	9.83096e-09	9.66061e-09	9.78615e-09		9.98914e-09	9.67629e-09	0.00643845	42.9	52.52	29	1.9	0.37
12	50.8686	50.3435	49.8705	49.4198	48.9877		0.5251	0.473	0.4507	0.4321		0.0449847	0.0413322	0.0395559	0.0376409		1.28586e-08	1.2126e-08	1.1968e-08	1.20332e-08		1.22578e-08	1.18739e-08	0.00698458	41.66	52.69	28	2.2	0.4
13	56.9994	56.189	55.4444	54.7318	54.0537		0.8104	0.7446	0.7126	0.6781		0.0284152	0.0253455	0.0242798	0.0230641		1.0094e-08	9.24092e-09	9.12936e-09	9.16312e-09		9.41917e-09	9.12417e-09	0.00665338	43.9	53.79	29	3.1	0.34
14	54.2839	53.772	53.3154	52.878	52.4625		0.5119	0.4566	0.4374	0.4155		0.0281432	0.0253622	0.0240522	0.0227699		8.98226e-09	8.30805e-09	8.12548e-09	8.12768e-09		8.3977e-09	8.13469e-09	0.00680738	42.76	52.46	20	2	0.4025	Missing Averaged
15	55.7261	55.2191	54.7622	54.3289	53.9187		0.507	0.4569	0.4333	0.4102		0.0179129	0.0159034	0.0151707	0.0143991		5.3291e-09	4.85601e-09	4.77724e-09	4.79091e-09		4.94551e-09	4.79062e-09	0.00789516	42.83	54.16	30	1.9	0.37
16	66.594	66.2713	65.9848	65.7115	65.4521		0.3227	0.2865	0.2733	0.2594		0.0287705	0.0253955	0.0242964	0.0234305		1.016e-08	9.20454e-09	9.08175e-09	9.25378e-09		9.43662e-09	9.14108e-09	0.00731641	44.76	61.24	35	1.4	0.4
17	62.3636	61.8453	61.3878	60.9501	60.528		0.5183	0.4575	0.4377	0.4221		0.0327949	0.0297308	0.0281155	0.0268609		1.25622e-08	1.16887e-08	1.13995e-08	1.15073e-08		1.18041e-08	1.14344e-08	0.00705163	44.27	56.44	31	2.1	0.44
18	58.3546	57.7638	57.2282	56.7217	56.2378		0.5908	0.5356	0.5065	0.4839		0.0277269	0.0254621	0.0242798	0.0232029		9.72317e-09	9.16434e-09	9.01226e-09	9.10001e-09		9.25853e-09	8.96856e-09	0.00720032	44.42	53.39	29	2.3	0.46
19	62.2193	61.7198	61.2611	60.8237	60.4057		0.4995	0.4587	0.4374	0.418		0.0326506	0.0300028	0.0284374	0.0271218		1.00821e-08	9.50869e-09	9.29462e-09	9.36637e-09		9.57306e-09	9.27324e-09	0.00741645	43.47	56.96	31	2.1	0.43
20	62.8068	62.2186	61.6781	61.1658	60.6772		0.5882	0.5405	0.5123	0.4886		0.0276159	0.0250847	0.0239134	0.0229475		6.64955e-09	6.19929e-09	6.09477e-09	6.17964e-09		6.28713e-09	6.09023e-09	0.00780381	43.39	59.4	32	2.6	0.39
21	68.4499	67.9524	67.5005	67.0697	66.6563		0.4975	0.4519	0.4308	0.4134		0.0327949	0.0292201	0.0277713	0.0266944		1.17329e-08	1.07295e-08	1.05166e-08	1.0681e-08		1.0929e-08	1.05867e-08	0.00705765	45.9	57.86	33	2.2	0.32
22	58.4	57.8092	57.2828	56.7825	56.3016		0.5908	0.5264	0.5003	0.4809		0.0394893	0.0365862	0.0346489	0.0331724		1.11676e-08	1.06194e-08	1.03718e-08	1.04918e-08		1.06724e-08	1.03381e-08	0.00747499	43.76	54.84	30	2.4	0.43
23	58.8636	57.1522	57.4931	56.8689	56.2713		1.7114	-0.3409	0.6242	0.5976		0.0303469	0.031335	0.0299029	0.0289037		1.06093e-08	1.12435e-08	1.10654e-08	1.1301e-08		1.1047e-08	1.0701e-08	0.00705453	45.44	55.56	31	2.9	0.36
24	59.117	58.5703	58.0058	57.4671	56.9464		0.5467	0.5645	0.5387	0.5207		0.0271996	0.0241188	0.0229697	0.0220871		9.19964e-09	8.37269e-09	8.22334e-09	8.35492e-09		8.54875e-09	8.28102e-09	0.00677089	43.15	56.13	30	2.7	0.42
25	55.7695	55.2795	54.845	54.4312	54.0333		0.49	0.4345	0.4138	0.3979		0.0339717	0.0309797	0.0283097	0.0276991		1.06097e-08	9.93036e-09	9.35848e-09	9.6749e-09		9.90736e-09	9.59707e-09	0.00714474	42.79	53.88	29	2.2	0.39
26	60.6574	60.0454	59.4873	58.9773	58.4783		0.612	0.5581	0.51	0.499		0.0337219	0.029975	0.0281432	0.0270774		1.25493e-08	1.1449e-08	1.10857e-08	1.12696e-08		1.1606e-08	1.12425e-08	0.00710061	44.1	55.03	30	2.7	0.38
27	61.299	60.6915	60.1515	59.6445	59.1567		0.6075	0.54	0.507	0.4878		0.0275937	0.0237358	0.0224424	0.0217707		9.84915e-09	8.69547e-09	8.47893e-09	8.69072e-09		8.94364e-09	8.66354e-09	0.00707407	43.45	55.94	31	2.5	0.45
28	58.5478	58.0507	57.6231	57.2188	56.8266		0.4971	0.4276	0.4043	0.3922		0.0355204	0.0324507	0.0307577	0.0295698		1.07994e-08	1.01262e-08	9.89822e-09	1.00545e-08		1.02299e-08	9.9095e-09	0.00753241	43.01	56.62	31	2.2	0.43
29	64.7004	64.0605	63.4759	62.9218	62.3891		0.6399	0.5846	0.5541	0.5327		0.0282986	0.0249847	0.0236359	0.0282431		9.92628e-09	8.99489e-09	8.77556e-09	1.10797e-08		9.67407e-09	9.37109e-09	0.00719843	44.34	58.54	31	2.8	0.39
30	61.5375	61.0277	60.5776	60.1518	59.643		0.5098	0.4501	0.4258	0.5088															43.79	56.24	31	2.2	0.43
Average Aircell Volume [m^3]	3.12272e-07	8.73541e-07	1.37763e-06	1.85682e-06	2.31724e-06
EXP 6 and 7 combined
mean D_H2O-Air [m^2/s]	mean D_O2-Air [m^2/s]
1.06126e-08	1.02802e-08		Mean D_H2O from indirect method:
8.19725e-09	7.94052e-09		mean D_H2O-Air [m^2/s]
9.79975e-09	9.49283e-09
9.89246e-09	9.58264e-09		Mean	1.02671e-08
1.09519e-08	1.06089e-08		Standard Error	2.5091e-10
1.05318e-08	1.0202e-08		Median	1.04289e-08
8.26166e-09	8.00291e-09		Mode	#N/A
1.13938e-08	1.1037e-08		Standard Deviation	1.92728e-09
1.04039e-08	1.00781e-08		Sample Variance	3.7144e-18
8.35248e-09	8.09089e-09		Kurtosis	1.59258
9.98914e-09	9.67629e-09		Skewness	0.0461476
1.22578e-08	1.18739e-08		Range	1.15421e-08
9.41917e-09	9.12417e-09		Minimum	4.94551e-09
8.3977e-09	8.13469e-09		Maximum	1.64876e-08
4.94551e-09	4.79062e-09		Sum	6.05761e-07
9.43662e-09	9.14108e-09		Count	59
1.18041e-08	1.14344e-08
9.25853e-09	8.96856e-09		Mean D_O2 from indirect method:
9.57306e-09	9.27324e-09		mean D_O2-Air [m^2/s]
6.28713e-09	6.09023e-09
1.0929e-08	1.05867e-08		Mean	9.94557e-09
1.06724e-08	1.03381e-08		Standard Error	2.43052e-10
1.1047e-08	1.0701e-08		Median	1.01023e-08
8.54875e-09	8.28102e-09		Mode	#N/A
9.90736e-09	9.59707e-09		Standard Deviation	1.86692e-09
1.1606e-08	1.12425e-08		Sample Variance	3.48539e-18
8.94364e-09	8.66354e-09		Kurtosis	1.59258
1.02299e-08	9.9095e-09		Skewness	0.0461476
9.67407e-09	9.37109e-09		Range	1.11806e-08
1.07363e-08	1.04e-08		Minimum	4.79062e-09
1.22461e-08	1.18626e-08		Maximum	1.59713e-08
8.98862e-09	8.70711e-09		Sum	5.86789e-07
1.30247e-08	1.26168e-08		Count	59
1.25356e-08	1.2143e-08
1.38445e-08	1.34109e-08
1.07439e-08	1.04074e-08
1.06168e-08	1.02843e-08
1.11568e-08	1.08074e-08
7.31239e-09	7.08338e-09
9.22433e-09	8.93544e-09
1.04844e-08	1.0156e-08
1.64876e-08	1.59713e-08
1.27325e-08	1.23338e-08
1.22901e-08	1.19052e-08
9.52592e-09	9.22758e-09
1.09512e-08	1.06082e-08
9.26366e-09	8.97353e-09
7.50212e-09	7.26716e-09
6.41155e-09	6.21075e-09
1.18174e-08	1.14473e-08
1.09674e-08	1.06239e-08
1.0038e-08	9.7236e-09
1.04289e-08	1.01023e-08
1.14752e-08	1.11159e-08
1.03467e-08	1.00227e-08
1.06366e-08	1.03035e-08
7.81666e-09	7.57185e-09
1.19298e-08	1.15562e-08
1.29004e-08	1.24964e-08
