# Supplementary material
Source: publisher figshare collection journal article supplement (https://frontiersin.figshare.com/ndownloader/files/28396665)
Supplement: Supplementary file 2 [file 28396665 › Table 7.XLSX]

## Sheet: Table 7
Temperature and RH% during the evaporation experiments (experiments 6 and 7)
EXP 6							EXP 7
Plot Title: (SN 20802381)							Plot Title: (SN 20802381)
#	Date Time, GMT +0200	Temp, °C	RH, %	DewPt, °C			#	Date Time, GMT +0200	Temp, °C	RH, %	DewPt, °C
1	2020-07-27 12:19:31	33.5737	26.1491	11.5269			1	2020-08-03 10:01:07	35.7429	27.2233	13.9786
2	2020-07-27 12:20:31	33.7827	26.027	11.6327			2	2020-08-03 10:02:07	35.1018	26.1491	12.8177
3	2020-07-27 12:21:31	34.4396	26.2467	12.3152			3	2020-08-03 10:03:07	34.7038	26.6862	12.792
4	2020-07-27 12:22:31	34.8627	26.0026	12.5301			4	2020-08-03 10:04:07	34.598	27.2966	13.0484
5	2020-07-27 12:23:31	35.2083	25.5875	12.5759			5	2020-08-03 10:05:07	34.598	27.6628	13.2527
6	2020-07-27 12:24:31	35.4217	25.2457	12.5502			6	2020-08-03 10:06:07	34.6509	27.8826	13.4191
7	2020-07-27 12:25:31	35.5821	24.9039	12.4771			7	2020-08-03 10:07:07	34.7038	27.9314	13.491
8	2020-07-27 12:26:31	35.7161	24.6109	12.409			8	2020-08-03 10:08:07	34.6773	27.9802	13.4954
9	2020-07-27 12:27:31	35.8502	24.44	12.4152			9	2020-08-03 10:09:07	34.6773	28.0291	13.5222
10	2020-07-27 12:28:31	35.9309	24.2691	12.3757			10	2020-08-03 10:10:07	34.7038	27.9802	13.5179
11	2020-07-27 12:29:31	36.0116	24.147	12.3664			11	2020-08-03 10:11:07	34.7303	27.9558	13.527
12	2020-07-27 12:30:31	36.0924	24.0005	12.3412			12	2020-08-03 10:12:07	34.7567	27.8826	13.5092
13	2020-07-27 12:31:31	36.1463	23.9272	12.3397			13	2020-08-03 10:13:07	34.7832	27.8826	13.5318
14	2020-07-27 12:32:31	36.2003	23.8296	12.3224			14	2020-08-03 10:14:07	34.8097	27.8337	13.5274
15	2020-07-27 12:33:31	36.2273	23.7563	12.298			15	2020-08-03 10:15:07	34.8627	27.7361	13.5184
16	2020-07-27 12:34:31	36.2543	23.6098	12.2264			16	2020-08-03 10:16:07	34.8893	27.614	13.4732
17	2020-07-27 12:35:31	36.3083	23.561	12.2399			17	2020-08-03 10:17:07	34.8893	27.5896	13.4596
18	2020-07-27 12:36:31	36.3354	23.5366	12.2467			18	2020-08-03 10:18:07	34.9423	27.4919	13.4502
19	2020-07-27 12:37:31	36.3624	23.4389	12.2059			19	2020-08-03 10:19:07	34.9689	27.3943	13.4181
20	2020-07-27 12:38:31	36.3624	23.4878	12.2376			20	2020-08-03 10:20:07	34.9955	27.2966	13.3858
21	2020-07-27 12:39:31	36.3895	23.4145	12.2126			21	2020-08-03 10:21:07	35.022	27.2233	13.3671
22	2020-07-27 12:40:31	36.3895	23.3657	12.1808			22	2020-08-03 10:22:07	35.0752	27.1257	13.357
23	2020-07-27 12:41:31	36.3895	23.3169	12.149			23	2020-08-03 10:23:07	35.1018	27.0524	13.338
24	2020-07-27 12:42:31	36.3895	23.268	12.1171			24	2020-08-03 10:24:07	35.1284	26.9792	13.3189
25	2020-07-27 12:43:31	36.4165	23.2192	12.1077			25	2020-08-03 10:25:07	35.155	26.9059	13.2998
26	2020-07-27 12:44:31	36.4165	23.1948	12.0917			26	2020-08-03 10:26:07	35.1816	26.8327	13.2805
27	2020-07-27 12:45:31	36.4165	23.1215	12.0436			27	2020-08-03 10:27:07	35.2083	26.7839	13.2751
28	2020-07-27 12:46:31	36.4436	23.0239	12.0018			28	2020-08-03 10:28:07	35.2349	26.7839	13.2977
29	2020-07-27 12:47:31	36.4436	23.0239	12.0018			29	2020-08-03 10:29:07	35.2616	26.6374	13.2361
30	2020-07-27 12:48:31	36.4707	22.9506	11.9759			30	2020-08-03 10:30:07	35.2882	26.613	13.2446
31	2020-07-27 12:49:31	36.1463	23.0483	11.771			31	2020-08-03 10:31:07	35.3416	26.5397	13.2474
32	2020-07-27 12:50:31	35.8502	23.4878	11.811			32	2020-08-03 10:32:07	35.3683	26.442	13.2134
33	2020-07-27 12:51:31	35.8234	23.8052	11.9924			33	2020-08-03 10:33:07	35.3949	26.3932	13.2076
34	2020-07-27 12:52:31	35.7965	24.0249	12.1096			34	2020-08-03 10:34:07	35.4217	26.2711	13.1591
35	2020-07-27 12:53:31	35.7697	24.1958	12.1949			35	2020-08-03 10:35:07	35.4484	26.2223	13.1532
36	2020-07-27 12:54:31	35.7429	24.3179	12.2491			36	2020-08-03 10:36:07	35.4751	26.1002	13.1042
37	2020-07-27 12:55:31	35.7161	24.3667	12.2572			37	2020-08-03 10:37:07	35.5018	26.0026	13.0693
38	2020-07-27 12:56:31	35.6892	24.4644	12.2956			38	2020-08-03 10:38:07	35.5553	25.8561	13.0279
39	2020-07-27 12:57:31	35.7161	24.5865	12.3939			39	2020-08-03 10:39:07	35.5821	25.8072	13.0215
40	2020-07-27 12:58:31	35.6892	24.6353	12.4016			40	2020-08-03 10:40:07	35.6089	25.734	13.0006
41	2020-07-27 12:59:31	35.6892	24.7574	12.477			41	2020-08-03 10:41:07	35.6356	25.6119	12.9503
42	2020-07-27 13:00:31	35.7161	24.8062	12.5295			42	2020-08-03 10:42:07	35.6624	25.5875	12.9583
43	2020-07-27 13:01:31	35.7161	24.9039	12.5895			43	2020-08-03 10:43:07	35.6892	25.4898	12.9223
44	2020-07-27 13:02:31	35.7429	24.9771	12.6568			44	2020-08-03 10:44:07	35.7161	25.4654	12.9302
45	2020-07-27 13:03:31	35.7429	25.0504	12.7015			45	2020-08-03 10:45:07	35.7429	25.3922	12.9087
46	2020-07-27 13:04:31	35.7429	25.1236	12.7461			46	2020-08-03 10:46:07	35.7697	25.3433	12.9018
47	2020-07-27 13:05:31	35.7697	25.148	12.7835			47	2020-08-03 10:47:07	35.7965	25.2945	12.8949
48	2020-07-27 13:06:31	35.7697	25.1969	12.8132			48	2020-08-03 10:48:07	35.8234	25.2945	12.9174
49	2020-07-27 13:07:31	35.7965	25.1969	12.8357			49	2020-08-03 10:49:07	35.8502	25.2945	12.94
50	2020-07-27 13:08:31	35.7965	25.2213	12.8505			50	2020-08-03 10:50:07	35.8771	25.2457	12.933
51	2020-07-27 13:09:31	35.7965	25.2701	12.8801			51	2020-08-03 10:51:07	35.904	25.1724	12.9111
52	2020-07-27 13:10:31	35.8234	25.2457	12.8879			52	2020-08-03 10:52:07	35.904	25.1724	12.9111
53	2020-07-27 13:11:31	35.8502	25.2701	12.9252			53	2020-08-03 10:53:07	35.9309	25.0992	12.8891
54	2020-07-27 13:12:31	35.8502	25.2945	12.94			54	2020-08-03 10:54:07	35.9578	25.0748	12.8968
55	2020-07-27 13:13:31	35.8502	25.3433	12.9695			55	2020-08-03 10:55:07	35.9847	24.9771	12.8597
56	2020-07-27 13:14:31	35.8502	25.3922	12.999			56	2020-08-03 10:56:07	36.0116	24.9771	12.8823
57	2020-07-27 13:15:31	35.8771	25.441	13.051			57	2020-08-03 10:57:07	36.0385	24.8794	12.845
58	2020-07-27 13:16:31	35.904	25.441	13.0736			58	2020-08-03 10:58:07	36.0385	24.8062	12.7999
59	2020-07-27 13:17:31	35.904	25.4898	13.103			59	2020-08-03 10:59:07	36.0655	24.8062	12.8225
60	2020-07-27 13:18:31	35.9309	25.4654	13.1109			60	2020-08-03 11:00:07	36.0655	24.6841	12.7471
61	2020-07-27 13:19:31	35.9578	25.4654	13.1336			61	2020-08-03 11:01:07	36.0924	24.6353	12.7394
62	2020-07-27 13:20:31	35.9847	25.4166	13.1268			62	2020-08-03 11:02:07	36.0924	24.5865	12.7091
63	2020-07-27 13:21:31	35.9847	25.3922	13.112			63	2020-08-03 11:03:07	36.1194	24.5376	12.7013
64	2020-07-27 13:22:31	35.9847	25.3922	13.112			64	2020-08-03 11:04:07	36.1194	24.4888	12.6709
65	2020-07-27 13:23:31	36.0116	25.3922	13.1347			65	2020-08-03 11:05:07	36.1463	24.4156	12.6477
66	2020-07-27 13:24:31	36.0116	25.3922	13.1347			66	2020-08-03 11:06:07	36.1733	24.3911	12.655
67	2020-07-27 13:25:31	36.0385	25.3922	13.1573			67	2020-08-03 11:07:07	36.2003	24.3667	12.6623
68	2020-07-27 13:26:31	36.0655	25.3678	13.1652			68	2020-08-03 11:08:07	36.2003	24.3179	12.6317
69	2020-07-27 13:27:31	36.0655	25.3189	13.1357			69	2020-08-03 11:09:07	36.2273	24.2446	12.6082
70	2020-07-27 13:28:31	36.0924	25.2457	13.1139			70	2020-08-03 11:10:07	36.2273	24.1714	12.562
71	2020-07-27 13:29:31	36.0924	25.1969	13.0843			71	2020-08-03 11:11:07	36.2543	24.0982	12.5383
72	2020-07-27 13:30:31	36.1194	25.0748	13.0325			72	2020-08-03 11:12:07	36.2813	24.0493	12.5299
73	2020-07-27 13:31:31	36.1463	25.0504	13.0402			73	2020-08-03 11:13:07	36.2813	23.9761	12.4834
74	2020-07-27 13:32:31	36.1463	25.0015	13.0103			74	2020-08-03 11:14:07	36.3083	23.9517	12.4904
75	2020-07-27 13:33:31	36.1733	24.9283	12.988			75	2020-08-03 11:15:07	36.3083	23.9517	12.4904
76	2020-07-27 13:34:31	36.2003	24.855	12.9656			76	2020-08-03 11:16:07	36.3354	23.8784	12.4663
77	2020-07-27 13:35:31	36.2273	24.8062	12.9582			77	2020-08-03 11:17:07	36.3354	23.8784	12.4663
78	2020-07-27 13:36:31	36.2273	24.7574	12.928			78	2020-08-03 11:18:07	36.3624	23.9028	12.5044
79	2020-07-27 13:37:31	36.2273	24.7085	12.8978			79	2020-08-03 11:19:07	36.3624	23.8784	12.4888
80	2020-07-27 13:38:31	36.2543	24.6841	12.9053			80	2020-08-03 11:20:07	36.3624	23.8296	12.4576
81	2020-07-27 13:39:31	36.2543	24.6841	12.9053			81	2020-08-03 11:21:07	36.3895	23.8296	12.4802
82	2020-07-27 13:40:31	36.2543	24.6841	12.9053			82	2020-08-03 11:22:07	36.3895	23.8052	12.4646
83	2020-07-27 13:41:31	36.2813	24.6841	12.9279			83	2020-08-03 11:23:07	36.4165	23.7563	12.4558
84	2020-07-27 13:42:31	36.2813	24.6841	12.9279			84	2020-08-03 11:24:07	36.4165	23.7319	12.4402
85	2020-07-27 13:43:31	36.2813	24.6841	12.9279			85	2020-08-03 11:25:07	36.4436	23.7319	12.4627
86	2020-07-27 13:44:31	36.2813	24.6353	12.8976			86	2020-08-03 11:26:07	36.4436	23.6587	12.4156
87	2020-07-27 13:45:31	36.3083	24.6353	12.9203			87	2020-08-03 11:27:07	36.4436	23.6098	12.3841
88	2020-07-27 13:46:31	36.3083	24.5865	12.8899			88	2020-08-03 11:28:07	36.4707	23.5854	12.3909
89	2020-07-27 13:47:31	36.3083	24.562	12.8747			89	2020-08-03 11:29:07	36.4707	23.5854	12.3909
90	2020-07-27 13:48:31	36.3354	24.5376	12.8821			90	2020-08-03 11:30:07	36.4707	23.5122	12.3436
91	2020-07-27 13:49:31	36.3624	24.4888	12.8743			91	2020-08-03 11:31:07	36.4707	23.5122	12.3436
92	2020-07-27 13:50:31	36.3624	24.4888	12.8743			92	2020-08-03 11:32:07	36.4978	23.4878	12.3503
93	2020-07-27 13:51:31	36.3895	24.4644	12.8817			93	2020-08-03 11:33:07	36.4978	23.4389	12.3186
94	2020-07-27 13:52:31	36.3895	24.4644	12.8817			94	2020-08-03 11:34:07	36.4978	23.4145	12.3027
95	2020-07-27 13:53:31	36.3895	24.4644	12.8817			95	2020-08-03 11:35:07	36.5249	23.3413	12.2776
96	2020-07-27 13:54:31	36.4165	24.44	12.8891			96	2020-08-03 11:36:07	36.5249	23.3657	12.2935
97	2020-07-27 13:55:31	36.4165	24.4156	12.8738			97	2020-08-03 11:37:07	36.5249	23.3657	12.2935
98	2020-07-27 13:56:31	36.4165	24.3667	12.8432			98	2020-08-03 11:38:07	36.5249	23.3169	12.2617
99	2020-07-27 13:57:31	36.4165	24.3423	12.8278			99	2020-08-03 11:39:07	36.552	23.2924	12.2683
100	2020-07-27 13:58:31	36.4165	24.3667	12.8432			100	2020-08-03 11:40:07	36.552	23.268	12.2523
101	2020-07-27 13:59:31	36.4436	24.3423	12.8505			101	2020-08-03 11:41:07	36.5791	23.2924	12.2908
102	2020-07-27 14:00:31	36.4436	24.3179	12.8351			102	2020-08-03 11:42:07	36.5791	23.2924	12.2908
103	2020-07-27 14:01:31	36.4436	24.3179	12.8351			103	2020-08-03 11:43:07	36.5791	23.268	12.2749
104	2020-07-27 14:02:31	36.4436	24.2691	12.8044			104	2020-08-03 11:44:07	36.5791	23.268	12.2749
105	2020-07-27 14:03:31	36.4707	24.2691	12.8271			105	2020-08-03 11:45:07	36.6063	23.268	12.2974
106	2020-07-27 14:04:31	36.4707	24.2446	12.8117			106	2020-08-03 11:46:07	36.6063	23.268	12.2974
107	2020-07-27 14:05:31	36.4707	24.1958	12.7808			107	2020-08-03 11:47:07	36.6063	23.1948	12.2494
108	2020-07-27 14:06:31	36.4707	24.2202	12.7963			108	2020-08-03 11:48:07	36.6063	23.1704	12.2334
109	2020-07-27 14:07:31	36.4707	24.2202	12.7963			109	2020-08-03 11:49:07	36.6063	23.1704	12.2334
110	2020-07-27 14:08:31	36.4978	24.1958	12.8035			110	2020-08-03 11:50:07	36.6063	23.1704	12.2334
111	2020-07-27 14:09:31	36.4978	24.147	12.7726			111	2020-08-03 11:51:07	36.6334	23.1459	12.2399
112	2020-07-27 14:10:31	36.5249	24.1226	12.7798			112	2020-08-03 11:52:07	36.6334	23.0971	12.2078
113	2020-07-27 14:11:31	36.5249	24.0982	12.7643			113	2020-08-03 11:53:07	36.6334	23.0727	12.1917
114	2020-07-27 14:12:31	36.5249	24.0493	12.7333			114	2020-08-03 11:54:07	36.6334	22.9995	12.1433
115	2020-07-27 14:13:31	36.5249	24.0493	12.7333			115	2020-08-03 11:55:07	36.6334	22.9995	12.1433
116	2020-07-27 14:14:31	36.552	24.0493	12.756			116	2020-08-03 11:56:07	36.6334	22.975	12.1272
117	2020-07-27 14:15:31	36.552	24.0493	12.756			117	2020-08-03 11:57:07	36.6334	22.9262	12.0949
118	2020-07-27 14:16:31	36.552	24.0249	12.7404			118	2020-08-03 11:58:07	36.6606	22.9262	12.1174
119	2020-07-27 14:17:31	36.5791	24.0005	12.7476			119	2020-08-03 11:59:07	36.6606	22.9018	12.1012
120	2020-07-27 14:18:31	36.5791	23.9761	12.732			120	2020-08-03 12:00:07	36.6606	22.8774	12.085
121	2020-07-27 14:19:31	36.5791	23.9761	12.732			121	2020-08-03 12:01:07	36.6606	22.8774	12.085
122	2020-07-27 14:20:31	36.5791	23.9761	12.732			122	2020-08-03 12:02:07	36.6606	22.8285	12.0525
123	2020-07-27 14:21:31	36.5791	23.9272	12.7009			123	2020-08-03 12:03:07	36.6606	22.8285	12.0525
124	2020-07-27 14:22:31	36.5791	23.9761	12.732			124	2020-08-03 12:04:07	36.6877	22.7797	12.0425
125	2020-07-27 14:23:31	36.5791	24.0005	12.7476			125	2020-08-03 12:05:07	36.6877	22.7309	12.0099
126	2020-07-27 14:24:31	36.5791	24.0005	12.7476			126	2020-08-03 12:06:07	36.6877	22.7797	12.0425
127	2020-07-27 14:25:31	36.6063	24.0249	12.7857			127	2020-08-03 12:07:07	36.6877	22.7309	12.0099
128	2020-07-27 14:26:31	36.6063	24.0737	12.8168			128	2020-08-03 12:08:07	36.6877	22.7065	11.9936
129	2020-07-27 14:27:31	36.6063	24.0982	12.8323			129	2020-08-03 12:09:07	36.6877	22.7065	11.9936
130	2020-07-27 14:28:31	36.6063	24.147	12.8632			130	2020-08-03 12:10:07	36.6877	22.6576	11.9609
131	2020-07-27 14:29:31	36.6063	24.1714	12.8787			131	2020-08-03 12:11:07	36.6877	22.6576	11.9609
132	2020-07-27 14:30:31	36.6063	24.2446	12.925			132	2020-08-03 12:12:07	36.6877	22.6332	11.9445
133	2020-07-27 14:31:31	36.6063	24.3179	12.9711			133	2020-08-03 12:13:07	36.4978	22.267	11.54
134	2020-07-27 14:32:31	36.6334	24.3911	13.0399			134	2020-08-03 12:14:07	36.4436	22.6576	11.7585
135	2020-07-27 14:33:31	36.6334	24.4156	13.0552			135	2020-08-03 12:15:07	36.552	22.853	11.9787
136	2020-07-27 14:34:31	36.6334	24.4644	13.0858			136	2020-08-03 12:16:07	36.6606	22.975	12.1497
137	2020-07-27 14:35:31	36.6334	24.5376	13.1316			137	2020-08-03 12:17:07	36.7693	22.9995	12.2562
138	2020-07-27 14:36:31	36.6334	24.5865	13.1621			138	2020-08-03 12:18:07	36.8509	23.0239	12.3401
139	2020-07-27 14:37:31	36.6334	24.6353	13.1925			139	2020-08-03 12:19:07	36.8782	23.1459	12.4433
140	2020-07-27 14:38:31	36.6334	24.6597	13.2077			140	2020-08-03 12:20:07	36.9054	23.0971	12.4338
141	2020-07-27 14:39:31	36.6334	24.733	13.2532			141	2020-08-03 12:21:07	36.9054	23.2192	12.5142
142	2020-07-27 14:40:31	36.6334	24.733	13.2532			142	2020-08-03 12:22:07	36.9054	23.2436	12.5302
143	2020-07-27 14:41:31	36.6334	24.8062	13.2986			143	2020-08-03 12:23:07	36.8782	23.3169	12.5555
144	2020-07-27 14:42:31	36.6334	24.8306	13.3137			144	2020-08-03 12:24:07	36.8782	23.3169	12.5555
145	2020-07-27 14:43:31	36.6334	24.8306	13.3137			145	2020-08-03 12:25:07	36.8782	23.3169	12.5555
146	2020-07-27 14:44:31	36.6334	24.855	13.3288			146	2020-08-03 12:26:07	36.8782	23.3413	12.5715
147	2020-07-27 14:45:31	36.6334	24.855	13.3288			147	2020-08-03 12:27:07	36.8782	23.3413	12.5715
148	2020-07-27 14:46:31	36.6334	24.855	13.3288			148	2020-08-03 12:28:07	36.8782	23.268	12.5235
149	2020-07-27 14:47:31	36.6334	24.9039	13.3589			149	2020-08-03 12:29:07	36.8782	23.2436	12.5075
150	2020-07-27 14:48:31	36.6334	24.9039	13.3589			150	2020-08-03 12:30:07	36.8782	23.2192	12.4915
151	2020-07-27 14:49:31	36.6334	24.9039	13.3589			151	2020-08-03 12:31:07	36.8782	23.2192	12.4915
152	2020-07-27 14:50:31	36.6334	24.9039	13.3589			152	2020-08-03 12:32:07	36.8509	23.1459	12.4207
153	2020-07-27 14:51:31	36.6334	24.9039	13.3589			153	2020-08-03 12:33:07	36.8782	23.1704	12.4594
154	2020-07-27 14:52:31	36.6606	24.9039	13.3817			154	2020-08-03 12:34:07	36.8509	23.1459	12.4207
155	2020-07-27 14:53:31	36.6606	24.9039	13.3817			155	2020-08-03 12:35:07	36.8782	23.1459	12.4433
156	2020-07-27 14:54:31	36.6606	24.9039	13.3817			156	2020-08-03 12:36:07	36.8782	23.1459	12.4433
157	2020-07-27 14:55:31	36.6606	24.9283	13.3967			157	2020-08-03 12:37:07	36.8782	23.1704	12.4594
158	2020-07-27 14:56:31	36.6606	24.9283	13.3967			158	2020-08-03 12:38:07	36.8782	23.2436	12.5075
159	2020-07-27 14:57:31	36.6606	24.9283	13.3967			159	2020-08-03 12:39:07	36.8782	23.3169	12.5555
160	2020-07-27 14:58:31	36.6606	24.9771	13.4268			160	2020-08-03 12:40:07	36.8782	23.3169	12.5555
161	2020-07-27 14:59:31	36.6606	24.9771	13.4268			161	2020-08-03 12:41:07	36.8782	23.3413	12.5715
162	2020-07-27 15:00:31	36.6606	24.9771	13.4268			162	2020-08-03 12:42:07	36.8782	23.3169	12.5555
163	2020-07-27 15:01:31	36.6606	25.0015	13.4418			163	2020-08-03 12:43:07	36.8782	23.268	12.5235
164	2020-07-27 15:02:31	36.6606	25.0015	13.4418			164	2020-08-03 12:44:07	36.9054	23.2436	12.5302
165	2020-07-27 15:03:31	36.6606	25.0015	13.4418			165	2020-08-03 12:45:07	36.9054	23.2192	12.5142
166	2020-07-27 15:04:31	36.6606	25.0015	13.4418			166	2020-08-03 12:46:07	36.9054	23.0727	12.4177
167	2020-07-27 15:05:31	36.6606	25.0015	13.4418			167	2020-08-03 12:47:07	36.9054	23.0483	12.4015
168	2020-07-27 15:06:31	36.6877	25.0015	13.4646			168	2020-08-03 12:48:07	36.9054	22.9262	12.3206
169	2020-07-27 15:07:31	36.6606	25.0015	13.4418			169	2020-08-03 12:49:07	36.9054	22.8774	12.2882
170	2020-07-27 15:08:31	36.6606	25.0015	13.4418			170	2020-08-03 12:50:07	36.9054	22.8041	12.2394
171	2020-07-27 15:09:31	36.6606	24.9771	13.4268			171	2020-08-03 12:51:07	36.9054	22.7065	12.1741
172	2020-07-27 15:10:31	36.6606	25.0015	13.4418			172	2020-08-03 12:52:07	36.9054	22.6576	12.1413
173	2020-07-27 15:11:31	36.6606	25.0015	13.4418			173	2020-08-03 12:53:07	36.9054	22.6088	12.1085
174	2020-07-27 15:12:31	36.6606	25.0259	13.4568			174	2020-08-03 12:54:07	36.9054	22.5356	12.0592
175	2020-07-27 15:13:31	36.6606	25.0748	13.4867			175	2020-08-03 12:55:07	36.9054	22.5111	12.0427
176	2020-07-27 15:14:31	36.6606	25.0748	13.4867			176	2020-08-03 12:56:07	36.9054	22.4379	11.9932
177	2020-07-27 15:15:31	36.6606	25.0992	13.5017			177	2020-08-03 12:57:07	36.9054	22.4379	11.9932
178	2020-07-27 15:16:31	36.6606	25.0992	13.5017			178	2020-08-03 12:58:07	36.9054	22.4135	11.9767
179	2020-07-27 15:17:31	36.6877	25.1236	13.5395			179	2020-08-03 12:59:07	36.9054	22.3891	11.9601
180	2020-07-27 15:18:31	36.6877	25.1724	13.5693			180	2020-08-03 13:00:07	36.9327	22.3891	11.9827
181	2020-07-27 15:19:31	36.6877	25.1969	13.5842			181	2020-08-03 13:01:07	36.9054	22.2914	11.8938
182	2020-07-27 15:20:31	36.6877	25.2457	13.614			182	2020-08-03 13:02:07	36.9327	22.2426	11.8831
183	2020-07-27 15:21:31	36.6877	25.2457	13.614			183	2020-08-03 13:03:07	36.9327	22.2182	11.8664
184	2020-07-27 15:22:31	36.6877	25.2457	13.614			184	2020-08-03 13:04:07	36.9054	22.2182	11.8438
185	2020-07-27 15:23:31	36.6877	25.2701	13.6289			185	2020-08-03 13:05:07	36.9054	22.2182	11.8438
186	2020-07-27 15:24:31	36.6877	25.2701	13.6289			186	2020-08-03 13:06:07	36.9327	22.1449	11.8163
187	2020-07-27 15:25:31	36.6877	25.2457	13.614			187	2020-08-03 13:07:07	36.9054	22.0717	11.7435
188	2020-07-27 15:26:31	36.6877	25.2701	13.6289			188	2020-08-03 13:08:07	36.9327	22.0717	11.7661
189	2020-07-27 15:27:31	36.6606	25.2701	13.6061			189	2020-08-03 13:09:07	36.9327	22.0472	11.7493
190	2020-07-27 15:28:31	36.6877	25.2701	13.6289			190	2020-08-03 13:10:07	36.9327	22.0472	11.7493
191	2020-07-27 15:29:31	36.6606	25.2701	13.6061			191	2020-08-03 13:11:07	36.9327	22.0472	11.7493
192	2020-07-27 15:30:31	36.6877	25.2701	13.6289			192	2020-08-03 13:12:07	36.9327	21.9984	11.7157
193	2020-07-27 15:31:31	36.6877	25.2945	13.6437			193	2020-08-03 13:13:07	36.9327	21.9984	11.7157
194	2020-07-27 15:32:31	36.6877	25.2945	13.6437			194	2020-08-03 13:14:07	36.9327	21.974	11.6988
195	2020-07-27 15:33:31	36.6877	25.2945	13.6437			195	2020-08-03 13:15:07	36.9327	21.9984	11.7157
196	2020-07-27 15:34:31	36.6877	25.2945	13.6437			196	2020-08-03 13:16:07	36.9327	21.9984	11.7157
197	2020-07-27 15:35:31	36.6877	25.2945	13.6437			197	2020-08-03 13:17:07	36.9327	21.9984	11.7157
198	2020-07-27 15:36:31	36.6877	25.2945	13.6437			198	2020-08-03 13:18:07	36.9327	22.0472	11.7493
199	2020-07-27 15:37:31	36.6877	25.2945	13.6437			199	2020-08-03 13:19:07	36.9327	22.0472	11.7493
200	2020-07-27 15:38:31	36.6877	25.3433	13.6734			200	2020-08-03 13:20:07	36.9327	22.0472	11.7493
201	2020-07-27 15:39:31	36.6606	25.3433	13.6506			201	2020-08-03 13:21:07	36.9327	22.0472	11.7493
202	2020-07-27 15:40:31	36.6606	25.3678	13.6654			202	2020-08-03 13:22:07	36.9327	22.0472	11.7493
203	2020-07-27 15:41:31	36.6606	25.3678	13.6654			203	2020-08-03 13:23:07	36.9327	22.0472	11.7493
204	2020-07-27 15:42:31	36.6606	25.3922	13.6802			204	2020-08-03 13:24:07	36.9327	22.0472	11.7493
205	2020-07-27 15:43:31	36.6606	25.3922	13.6802			205	2020-08-03 13:25:07	36.9327	22.0717	11.7661
206	2020-07-27 15:44:31	36.6606	25.4654	13.7246			206	2020-08-03 13:26:07	36.9327	22.0717	11.7661
207	2020-07-27 15:45:31	36.6877	25.4654	13.7474			207	2020-08-03 13:27:07	36.9327	22.0717	11.7661
208	2020-07-27 15:46:31	36.6877	25.5143	13.7769			208	2020-08-03 13:28:07	36.9327	22.0717	11.7661
209	2020-07-27 15:47:31	36.6877	25.5387	13.7917			209	2020-08-03 13:29:07	36.9054	22.1205	11.777
210	2020-07-27 15:48:31	36.6606	25.5631	13.7835			210	2020-08-03 13:30:07	36.9054	22.0717	11.7435
211	2020-07-27 15:49:31	36.6877	25.5631	13.8064			211	2020-08-03 13:31:07	36.9054	22.0717	11.7435
212	2020-07-27 15:50:31	36.6877	25.5631	13.8064			212	2020-08-03 13:32:07	36.9054	21.9984	11.6932
213	2020-07-27 15:51:31	36.6877	25.6119	13.8358			213	2020-08-03 13:33:07	36.9054	21.974	11.6763
214	2020-07-27 15:52:31	36.6877	25.6119	13.8358			214	2020-08-03 13:34:07	36.9327	21.9008	11.6483
215	2020-07-27 15:53:31	36.6877	25.6119	13.8358			215	2020-08-03 13:35:07	36.9327	21.8763	11.6314
216	2020-07-27 15:54:31	36.6877	25.6363	13.8505			216	2020-08-03 13:36:07	36.9327	21.8519	11.6145
217	2020-07-27 15:55:31	36.6877	25.6363	13.8505			217	2020-08-03 13:37:07	36.9327	21.8031	11.5806
218	2020-07-27 15:56:31	36.6877	25.6852	13.8798			218	2020-08-03 13:38:07	36.9327	21.8031	11.5806
219	2020-07-27 15:57:31	36.6877	25.7096	13.8945			219	2020-08-03 13:39:07	36.9327	21.7787	11.5636
220	2020-07-27 15:58:31	36.6877	25.734	13.9091			220	2020-08-03 13:40:07	36.9327	21.7298	11.5297
221	2020-07-27 15:59:31	36.6877	25.734	13.9091			221	2020-08-03 13:41:07	36.9327	21.7787	11.5636
222	2020-07-27 16:00:31	36.6877	25.734	13.9091			222	2020-08-03 13:42:07	36.9327	21.8031	11.5806
223	2020-07-27 16:01:31	36.6877	25.7828	13.9383			223	2020-08-03 13:43:07	36.9327	21.7787	11.5636
224	2020-07-27 16:02:31	36.6877	25.7828	13.9383			224	2020-08-03 13:44:07	36.9327	21.8031	11.5806
225	2020-07-27 16:03:31	36.6877	25.7828	13.9383			225	2020-08-03 13:45:07	36.9327	21.8031	11.5806
226	2020-07-27 16:04:31	36.6877	25.8317	13.9675			226	2020-08-03 13:46:07	36.9327	21.8031	11.5806
227	2020-07-27 16:05:31	36.6877	25.8317	13.9675			227	2020-08-03 13:47:07	36.9327	21.8031	11.5806
228	2020-07-27 16:06:31	36.6877	25.8317	13.9675			228	2020-08-03 13:48:07	36.96	21.7298	11.5522
229	2020-07-27 16:07:31	36.7149	25.8805	14.0196			229	2020-08-03 13:49:07	36.96	21.7787	11.5861
230	2020-07-27 16:08:31	36.6877	25.8805	13.9967			230	2020-08-03 13:50:07	36.96	21.7298	11.5522
231	2020-07-27 16:09:31	36.7149	25.8805	14.0196			231	2020-08-03 13:51:07	36.96	21.7787	11.5861
232	2020-07-27 16:10:31	36.7149	25.9049	14.0341			232	2020-08-03 13:52:07	36.96	21.7787	11.5861
233	2020-07-27 16:11:31	36.7149	25.9537	14.0632			233	2020-08-03 13:53:07	36.96	21.7787	11.5861
234	2020-07-27 16:12:31	36.7149	26.0026	14.0922			234	2020-08-03 13:54:07	36.96	21.7298	11.5522
235	2020-07-27 16:13:31	36.7149	26.0026	14.0922			235	2020-08-03 13:55:07	36.96	21.7298	11.5522
236	2020-07-27 16:14:31	36.7149	26.027	14.1067			236	2020-08-03 13:56:07	36.96	21.681	11.5181
237	2020-07-27 16:15:31	36.7149	26.027	14.1067			237	2020-08-03 13:57:07	36.96	21.6078	11.4669
238	2020-07-27 16:16:31	36.7149	26.0514	14.1212			238	2020-08-03 13:58:07	36.96	21.6078	11.4669
239	2020-07-27 16:17:31	36.7149	26.1002	14.1501			239	2020-08-03 13:59:07	36.96	21.5345	11.4156
240	2020-07-27 16:18:31	36.7149	26.1002	14.1501			240	2020-08-03 14:00:07	36.96	21.5345	11.4156
241	2020-07-27 16:19:31	36.7421	26.1002	14.1731			241	2020-08-03 14:01:07	36.96	21.5345	11.4156
242	2020-07-27 16:20:31	36.7421	26.1002	14.1731			242	2020-08-03 14:02:07	36.96	21.5101	11.3984
243	2020-07-27 16:21:31	36.7421	26.1002	14.1731			243	2020-08-03 14:03:07	36.96	21.5345	11.4156
244	2020-07-27 16:22:31	36.7421	26.1002	14.1731			244	2020-08-03 14:04:07	36.96	21.5345	11.4156
245	2020-07-27 16:23:31	36.7421	26.1002	14.1731			245	2020-08-03 14:05:07	36.96	21.6322	11.484
246	2020-07-27 16:24:31	36.7421	26.1002	14.1731			246	2020-08-03 14:06:07	36.96	21.7054	11.5351
247	2020-07-27 16:25:31	36.7421	26.1735	14.2164			247	2020-08-03 14:07:07	36.96	21.7787	11.5861
248	2020-07-27 16:26:31	36.7421	26.1735	14.2164			248	2020-08-03 14:08:07	36.96	21.8031	11.6031
249	2020-07-27 16:27:31	36.7421	26.1979	14.2308			249	2020-08-03 14:09:07	36.96	21.9008	11.6708
250	2020-07-27 16:28:31	36.7421	26.2223	14.2452			250	2020-08-03 14:10:07	36.96	21.9008	11.6708
251	2020-07-27 16:29:31	36.7421	26.2956	14.2883			251	2020-08-03 14:11:07	36.96	21.974	11.7214
252	2020-07-27 16:30:31	36.7421	26.3932	14.3457			252	2020-08-03 14:12:07	36.96	21.9984	11.7382
253	2020-07-27 16:31:31	36.7421	26.4665	14.3886			253	2020-08-03 14:13:07	36.96	21.9984	11.7382
254	2020-07-27 16:32:31	36.7421	26.4909	14.4029			254	2020-08-03 14:14:07	36.96	22.0472	11.7718
255	2020-07-27 16:33:31	36.7421	26.5397	14.4314			255	2020-08-03 14:15:07	36.96	22.0472	11.7718
256	2020-07-27 16:34:31	36.7421	26.613	14.4741			256	2020-08-03 14:16:07	36.96	22.0717	11.7886
257	2020-07-27 16:35:31	36.7149	26.6374	14.4653			257	2020-08-03 14:17:07	36.9872	22.1205	11.8446
258	2020-07-27 16:36:31	36.7421	26.6618	14.5025			258	2020-08-03 14:18:07	36.9872	22.0717	11.8111
259	2020-07-27 16:37:31	36.7421	26.7106	14.5308			259	2020-08-03 14:19:07	36.9872	22.1449	11.8614
260	2020-07-27 16:38:31	36.7421	26.7106	14.5308			260	2020-08-03 14:20:07	36.9872	22.1449	11.8614
261	2020-07-27 16:39:31	36.7421	26.7106	14.5308			261	2020-08-03 14:21:07	36.9872	22.1693	11.8781
262	2020-07-27 16:40:31	36.7421	26.7106	14.5308			262	2020-08-03 14:22:07	36.9872	22.1937	11.8948
263	2020-07-27 16:41:31	36.7421	26.7106	14.5308			263	2020-08-03 14:23:07	36.9872	22.1937	11.8948
264	2020-07-27 16:42:31	36.7421	26.7106	14.5308			264	2020-08-03 14:24:07	36.9872	22.267	11.9448
265	2020-07-27 16:43:31	36.7421	26.7106	14.5308			265	2020-08-03 14:25:07	36.9872	22.267	11.9448
266	2020-07-27 16:44:31	36.7421	26.735	14.545			266	2020-08-03 14:26:07	36.9872	22.2914	11.9614
267	2020-07-27 16:45:31	36.7421	26.735	14.545			267	2020-08-03 14:27:07	36.9872	22.3402	11.9947
268	2020-07-27 16:46:31	36.7421	26.735	14.545			268	2020-08-03 14:28:07	36.9872	22.3646	12.0113
269	2020-07-27 16:47:31	36.7421	26.7839	14.5733			269	2020-08-03 14:29:07	36.9872	22.3646	12.0113
270	2020-07-27 16:48:31	36.7421	26.7839	14.5733			270	2020-08-03 14:30:07	36.9872	22.3891	12.0278
271	2020-07-27 16:49:31	36.7421	26.7839	14.5733			271	2020-08-03 14:31:07	37.0145	22.3891	12.0504
272	2020-07-27 16:50:31	36.7149	26.7839	14.5503			272	2020-08-03 14:32:07	36.9872	22.3891	12.0278
273	2020-07-27 16:51:31	36.7149	26.7839	14.5503			273	2020-08-03 14:33:07	36.9872	22.4379	12.0609
274	2020-07-27 16:52:31	36.7149	26.7839	14.5503			274	2020-08-03 14:34:07	36.9872	22.3891	12.0278
275	2020-07-27 16:53:31	36.7149	26.8083	14.5644			275	2020-08-03 14:35:07	36.9872	22.3891	12.0278
276	2020-07-27 16:54:31	36.7149	26.8327	14.5785			276	2020-08-03 14:36:07	36.9872	22.4379	12.0609
277	2020-07-27 16:55:31	36.7149	26.8327	14.5785			277	2020-08-03 14:37:07	36.96	22.4135	12.0218
278	2020-07-27 16:56:31	36.7149	26.8815	14.6067			278	2020-08-03 14:38:07	36.96	22.3891	12.0053
279	2020-07-27 16:57:31	36.7149	26.9059	14.6208			279	2020-08-03 14:39:07	36.96	22.3891	12.0053
280	2020-07-27 16:58:31	36.7149	26.9792	14.663			280	2020-08-03 14:40:07	36.96	22.4135	12.0218
281	2020-07-27 16:59:31	36.7149	26.9792	14.663			281	2020-08-03 14:41:07	36.96	22.3891	12.0053
282	2020-07-27 17:00:31	36.7149	27.0036	14.677			282	2020-08-03 14:42:07	36.96	22.3402	11.9721
283	2020-07-27 17:01:31	36.7149	27.0524	14.705			283	2020-08-03 14:43:07	36.96	22.3891	12.0053
284	2020-07-27 17:02:31	36.7149	27.0768	14.719			284	2020-08-03 14:44:07	36.96	22.4135	12.0218
285	2020-07-27 17:03:31	36.7149	27.0768	14.719			285	2020-08-03 14:45:07	36.96	22.4135	12.0218
286	2020-07-27 17:04:31	36.7149	27.1501	14.761			286	2020-08-03 14:46:07	36.96	22.3891	12.0053
287	2020-07-27 17:05:31	36.7149	27.1501	14.761			287	2020-08-03 14:47:07	36.96	22.3891	12.0053
288	2020-07-27 17:06:31	36.7149	27.1745	14.7749			288	2020-08-03 14:48:07	36.9872	22.3402	11.9947
289	2020-07-27 17:07:31	36.7149	27.1745	14.7749			289	2020-08-03 14:49:07	36.9872	22.3158	11.9781
290	2020-07-27 17:08:31	36.7149	27.1501	14.761			290	2020-08-03 14:50:07	36.9872	22.3158	11.9781
291	2020-07-27 17:09:31	36.7149	27.1501	14.761			291	2020-08-03 14:51:07	36.9872	22.3402	11.9947
292	2020-07-27 17:10:31	36.7149	27.1501	14.761			292	2020-08-03 14:52:07	36.9872	22.3158	11.9781
293	2020-07-27 17:11:31	36.7149	27.1013	14.733			293	2020-08-03 14:53:07	36.9872	22.3646	12.0113
294	2020-07-27 17:12:31	36.6877	27.0524	14.682			294	2020-08-03 14:54:07	36.9872	22.3158	11.9781
295	2020-07-27 17:13:31	36.7149	27.0524	14.705			295	2020-08-03 14:55:07	37.0145	22.3402	12.0173
296	2020-07-27 17:14:31	36.6877	27.0524	14.682			296	2020-08-03 14:56:07	36.9872	22.3402	11.9947
297	2020-07-27 17:15:31	36.6877	27.0768	14.696			297	2020-08-03 14:57:07	36.9872	22.3402	11.9947
298	2020-07-27 17:16:31	36.6877	27.0768	14.696			298	2020-08-03 14:58:07	36.9872	22.3646	12.0113
299	2020-07-27 17:17:31	36.7149	27.0768	14.719			299	2020-08-03 14:59:07	36.9872	22.3646	12.0113
300	2020-07-27 17:18:31	36.7149	27.0768	14.719			300	2020-08-03 15:00:07	36.9872	22.3891	12.0278
301	2020-07-27 17:19:31	36.7149	27.0524	14.705			301	2020-08-03 15:01:07	36.9872	22.3891	12.0278
302	2020-07-27 17:20:31	36.7149	27.0036	14.677			302	2020-08-03 15:02:07	36.9872	22.4135	12.0444
303	2020-07-27 17:21:31	36.7149	27.0036	14.677			303	2020-08-03 15:03:07	36.9872	22.4135	12.0444
304	2020-07-27 17:22:31	36.7149	26.9792	14.663			304	2020-08-03 15:04:07	36.9872	22.4379	12.0609
305	2020-07-27 17:23:31	36.7149	26.9304	14.6349			305	2020-08-03 15:05:07	36.9872	22.4379	12.0609
306	2020-07-27 17:24:31	36.7149	26.9792	14.663			306	2020-08-03 15:06:07	36.96	22.4379	12.0384
307	2020-07-27 17:25:31	36.7149	26.9792	14.663			307	2020-08-03 15:07:07	36.9872	22.4867	12.094
308	2020-07-27 17:26:31	36.7149	26.9792	14.663			308	2020-08-03 15:08:07	36.9872	22.4867	12.094
309	2020-07-27 17:27:31	36.7149	27.0036	14.677			309	2020-08-03 15:09:07	36.9872	22.5111	12.1105
310	2020-07-27 17:28:31	36.7149	27.0036	14.677			310	2020-08-03 15:10:07	36.96	22.4867	12.0714
311	2020-07-27 17:29:31	36.7149	27.0036	14.677			311	2020-08-03 15:11:07	36.9872	22.5111	12.1105
312	2020-07-27 17:30:31	36.7149	27.0036	14.677			312	2020-08-03 15:12:07	36.9872	22.5111	12.1105
313	2020-07-27 17:31:31	36.7421	27.0036	14.7			313	2020-08-03 15:13:07	36.96	22.5111	12.0879
314	2020-07-27 17:32:31	36.7421	27.0036	14.7			314	2020-08-03 15:14:07	36.96	22.4867	12.0714
315	2020-07-27 17:33:31	36.7421	26.9792	14.686			315	2020-08-03 15:15:07	36.96	22.4867	12.0714
316	2020-07-27 17:34:31	36.7421	26.9792	14.686			316	2020-08-03 15:16:07	36.96	22.4867	12.0714
317	2020-07-27 17:35:31	36.7421	26.9304	14.6579			317	2020-08-03 15:17:07	36.96	22.4867	12.0714
318	2020-07-27 17:36:31	36.7149	26.9304	14.6349			318	2020-08-03 15:18:07	36.96	22.4379	12.0384
319	2020-07-27 17:37:31	36.7421	26.9304	14.6579			319	2020-08-03 15:19:07	36.96	22.4867	12.0714
320	2020-07-27 17:38:31	36.7421	26.9059	14.6438			320	2020-08-03 15:20:07	36.96	22.5111	12.0879
321	2020-07-27 17:39:31	36.7149	26.8815	14.6067			321	2020-08-03 15:21:07	36.96	22.5111	12.0879
322	2020-07-27 17:40:31	36.7149	26.8327	14.5785			322	2020-08-03 15:22:07	36.9327	22.4867	12.0488
323	2020-07-27 17:41:31	36.7149	26.8327	14.5785			323	2020-08-03 15:23:07	36.9327	22.5111	12.0653
324	2020-07-27 17:42:31	36.7149	26.8327	14.5785			324	2020-08-03 15:24:07	36.9327	22.5111	12.0653
325	2020-07-27 17:43:31	36.7149	26.8327	14.5785			325	2020-08-03 15:25:07	36.9327	22.5111	12.0653
326	2020-07-27 17:44:31	36.7421	26.8327	14.6015			326	2020-08-03 15:26:07	36.9327	22.4867	12.0488
327	2020-07-27 17:45:31	36.7421	26.8327	14.6015			327	2020-08-03 15:27:07	36.9327	22.4867	12.0488
328	2020-07-27 17:46:31	36.7149	26.8327	14.5785			328	2020-08-03 15:28:07	36.9327	22.5111	12.0653
329	2020-07-27 17:47:31	36.7421	26.8815	14.6297			329	2020-08-03 15:29:07	36.9327	22.5111	12.0653
330	2020-07-27 17:48:31	36.7421	26.8815	14.6297			330	2020-08-03 15:30:07	36.9327	22.5844	12.1147
331	2020-07-27 17:49:31	36.7421	26.9059	14.6438			331	2020-08-03 15:31:07	36.9327	22.56	12.0982
332	2020-07-27 17:50:31	36.7421	26.9059	14.6438			332	2020-08-03 15:32:07	36.9327	22.5844	12.1147
333	2020-07-27 17:51:31	36.7421	26.9304	14.6579			333	2020-08-03 15:33:07	36.9327	22.56	12.0982
334	2020-07-27 17:52:31	36.7421	26.9304	14.6579			334	2020-08-03 15:34:07	36.96	22.56	12.1208
335	2020-07-27 17:53:31	36.7421	26.9304	14.6579			335	2020-08-03 15:35:07	36.96	22.5844	12.1373
336	2020-07-27 17:54:31	36.7421	26.9304	14.6579			336	2020-08-03 15:36:07	36.96	22.56	12.1208
337	2020-07-27 17:55:31	36.7421	26.9059	14.6438			337	2020-08-03 15:37:07	36.9327	22.56	12.0982
338	2020-07-27 17:56:31	36.7421	26.9059	14.6438			338	2020-08-03 15:38:07	36.9327	22.56	12.0982
339	2020-07-27 17:57:31	36.7693	26.9059	14.6668			339	2020-08-03 15:39:07	36.9327	22.56	12.0982
340	2020-07-27 17:58:31	36.7421	26.8815	14.6297			340	2020-08-03 15:40:07	36.9327	22.56	12.0982
341	2020-07-27 17:59:31	36.7693	26.8815	14.6527			341	2020-08-03 15:41:07	36.9327	22.5111	12.0653
342	2020-07-27 18:00:31	36.7421	26.8815	14.6297			342	2020-08-03 15:42:07	36.9327	22.4867	12.0488
343	2020-07-27 18:01:31	36.7421	26.8327	14.6015			343	2020-08-03 15:43:07	36.9327	22.5111	12.0653
344	2020-07-27 18:02:31	36.7421	26.8327	14.6015			344	2020-08-03 15:44:07	36.9327	22.5111	12.0653
345	2020-07-27 18:03:31	36.7421	26.8083	14.5874			345	2020-08-03 15:45:07	36.9327	22.4379	12.0158
346	2020-07-27 18:04:31	36.7421	26.8083	14.5874			346	2020-08-03 15:46:07	36.9327	22.4867	12.0488
347	2020-07-27 18:05:31	36.7421	26.8083	14.5874			347	2020-08-03 15:47:07	36.96	22.4379	12.0384
348	2020-07-27 18:06:31	36.7421	26.7839	14.5733			348	2020-08-03 15:48:07	36.96	22.4135	12.0218
349	2020-07-27 18:07:31	36.7421	26.735	14.545			349	2020-08-03 15:49:07	36.96	22.4135	12.0218
350	2020-07-27 18:08:31	36.7421	26.7106	14.5308			350	2020-08-03 15:50:07	36.96	22.3891	12.0053
351	2020-07-27 18:09:31	36.7421	26.7106	14.5308			351	2020-08-03 15:51:07	36.96	22.3891	12.0053
352	2020-07-27 18:10:31	36.7421	26.6374	14.4883			352	2020-08-03 15:52:07	36.96	22.3891	12.0053
353	2020-07-27 18:11:31	36.7421	26.613	14.4741			353	2020-08-03 15:53:07	36.96	22.4135	12.0218
354	2020-07-27 18:12:31	36.7421	26.613	14.4741			354	2020-08-03 15:54:07	36.96	22.3402	11.9721
355	2020-07-27 18:13:31	36.7149	26.613	14.4511			355	2020-08-03 15:55:07	36.96	22.3402	11.9721
356	2020-07-27 18:14:31	36.7149	26.5641	14.4226			356	2020-08-03 15:56:07	36.96	22.3158	11.9555
357	2020-07-27 18:15:31	36.7149	26.5641	14.4226			357	2020-08-03 15:57:07	36.96	22.3158	11.9555
358	2020-07-27 18:16:31	36.7149	26.5641	14.4226			358	2020-08-03 15:58:07	36.9872	22.2914	11.9614
359	2020-07-27 18:17:31	36.7149	26.5641	14.4226			359	2020-08-03 15:59:07	36.9872	22.2914	11.9614
360	2020-07-27 18:18:31	36.7149	26.5641	14.4226			360	2020-08-03 16:00:07	36.9872	22.2914	11.9614
361	2020-07-27 18:19:31	36.7149	26.5641	14.4226			361	2020-08-03 16:01:07	36.9872	22.2914	11.9614
362	2020-07-27 18:20:31	36.7149	26.5641	14.4226			362	2020-08-03 16:02:07	36.9872	22.2426	11.9282
363	2020-07-27 18:21:31	36.7149	26.5641	14.4226			363	2020-08-03 16:03:07	36.9872	22.2426	11.9282
364	2020-07-27 18:22:31	36.7149	26.5641	14.4226			364	2020-08-03 16:04:07	36.9872	22.2426	11.9282
365	2020-07-27 18:23:31	36.7149	26.5641	14.4226			365	2020-08-03 16:05:07	36.9872	22.2914	11.9614
366	2020-07-27 18:24:31	36.7149	26.5397	14.4084			366	2020-08-03 16:06:07	37.0145	22.267	11.9674
367	2020-07-27 18:25:31	36.7149	26.5641	14.4226			367	2020-08-03 16:07:07	37.0145	22.267	11.9674
368	2020-07-27 18:26:31	36.6877	26.5641	14.3997			368	2020-08-03 16:08:07	37.0145	22.267	11.9674
369	2020-07-27 18:27:31	36.7149	26.5641	14.4226			369	2020-08-03 16:09:07	37.0145	22.2182	11.934
370	2020-07-27 18:28:31	36.6877	26.5641	14.3997			370	2020-08-03 16:10:07	37.0145	22.2182	11.934
371	2020-07-27 18:29:31	36.6877	26.5885	14.4139			371	2020-08-03 16:11:07	37.0145	22.1693	11.9007
372	2020-07-27 18:30:31	36.7149	26.613	14.4511			372	2020-08-03 16:12:07	37.0145	22.1937	11.9174
373	2020-07-27 18:31:31	36.7149	26.613	14.4511			373	2020-08-03 16:13:07	37.0145	22.1937	11.9174
374	2020-07-27 18:32:31	36.7149	26.613	14.4511			374	2020-08-03 16:14:07	37.0145	22.2182	11.934
375	2020-07-27 18:33:31	36.7149	26.613	14.4511			375	2020-08-03 16:15:07	37.0145	22.1937	11.9174
376	2020-07-27 18:34:31	36.7149	26.613	14.4511			376	2020-08-03 16:16:07	37.0145	22.1937	11.9174
377	2020-07-27 18:35:31	36.7149	26.6374	14.4653			377	2020-08-03 16:17:07	37.0145	22.1937	11.9174
378	2020-07-27 18:36:31	36.7149	26.6374	14.4653			378	2020-08-03 16:18:07	37.0145	22.2182	11.934
379	2020-07-27 18:37:31	36.7149	26.6374	14.4653			379	2020-08-03 16:19:07	36.9872	22.2182	11.9115
380	2020-07-27 18:38:31	36.7149	26.6618	14.4795			380	2020-08-03 16:20:07	36.9872	22.1937	11.8948
381	2020-07-27 18:39:31	36.7149	26.6618	14.4795			381	2020-08-03 16:21:07	36.9872	22.2182	11.9115
382	2020-07-27 18:40:31	36.7149	26.6618	14.4795			382	2020-08-03 16:22:07	36.9872	22.2426	11.9282
383	2020-07-27 18:41:31	36.7149	26.6618	14.4795			383	2020-08-03 16:23:07	36.9872	22.2182	11.9115
384	2020-07-27 18:42:31	36.7149	26.7106	14.5078			384	2020-08-03 16:24:07	36.9872	22.2182	11.9115
385	2020-07-27 18:43:31	36.7149	26.7106	14.5078			385	2020-08-03 16:25:07	36.9872	22.2426	11.9282
386	2020-07-27 18:44:31	36.7149	26.7106	14.5078			386	2020-08-03 16:26:07	36.9872	22.2182	11.9115
387	2020-07-27 18:45:31	36.7421	26.7106	14.5308			387	2020-08-03 16:27:07	36.9872	22.2426	11.9282
388	2020-07-27 18:46:31	36.7421	26.735	14.545			388	2020-08-03 16:28:07	36.9872	22.2426	11.9282
389	2020-07-27 18:47:31	36.7421	26.735	14.545			389	2020-08-03 16:29:07	36.9872	22.2426	11.9282
390	2020-07-27 18:48:31	36.7421	26.735	14.545			390	2020-08-03 16:30:07	36.96	22.2426	11.9056
391	2020-07-27 18:49:31	36.7421	26.7106	14.5308			391	2020-08-03 16:31:07	36.96	22.2426	11.9056
392	2020-07-27 18:50:31	36.7149	26.735	14.522			392	2020-08-03 16:32:07	36.9872	22.2426	11.9282
393	2020-07-27 18:51:31	36.7149	26.7106	14.5078			393	2020-08-03 16:33:07	36.9872	22.2426	11.9282
394	2020-07-27 18:52:31	36.7149	26.7106	14.5078			394	2020-08-03 16:34:07	36.9872	22.2426	11.9282
395	2020-07-27 18:53:31	36.7149	26.7106	14.5078			395	2020-08-03 16:35:07	36.9872	22.2426	11.9282
396	2020-07-27 18:54:31	36.7149	26.7106	14.5078			396	2020-08-03 16:36:07	36.9872	22.2426	11.9282
397	2020-07-27 18:55:31	36.7149	26.6618	14.4795			397	2020-08-03 16:37:07	36.9872	22.2914	11.9614
398	2020-07-27 18:56:31	36.7149	26.6374	14.4653			398	2020-08-03 16:38:07	36.96	22.2914	11.9389
399	2020-07-27 18:57:31	36.7149	26.6374	14.4653			399	2020-08-03 16:39:07	36.96	22.2914	11.9389
400	2020-07-27 18:58:31	36.7149	26.6374	14.4653			400	2020-08-03 16:40:07	36.96	22.2914	11.9389
401	2020-07-27 18:59:31	36.7149	26.613	14.4511			401	2020-08-03 16:41:07	36.96	22.3158	11.9555
402	2020-07-27 19:00:31	36.7149	26.613	14.4511			402	2020-08-03 16:42:07	36.96	22.3158	11.9555
403	2020-07-27 19:01:31	36.6877	26.5641	14.3997			403	2020-08-03 16:43:07	36.96	22.3402	11.9721
404	2020-07-27 19:02:31	36.6877	26.5641	14.3997			404	2020-08-03 16:44:07	36.96	22.3402	11.9721
405	2020-07-27 19:03:31	36.6877	26.5397	14.3854			405	2020-08-03 16:45:07	36.96	22.3402	11.9721
406	2020-07-27 19:04:31	36.7149	26.4909	14.3799			406	2020-08-03 16:46:07	36.9327	22.3402	11.9495
407	2020-07-27 19:05:31	36.7149	26.4909	14.3799			407	2020-08-03 16:47:07	36.9327	22.3402	11.9495
408	2020-07-27 19:06:31	36.7149	26.4665	14.3656			408	2020-08-03 16:48:07	36.96	22.3402	11.9721
409	2020-07-27 19:07:31	36.6877	26.4665	14.3427			409	2020-08-03 16:49:07	36.96	22.3158	11.9555
410	2020-07-27 19:08:31	36.6877	26.442	14.3284			410	2020-08-03 16:50:07	36.96	22.3158	11.9555
411	2020-07-27 19:09:31	36.7149	26.442	14.3513			411	2020-08-03 16:51:07	36.96	22.3158	11.9555
412	2020-07-27 19:10:31	36.7149	26.3932	14.3227			412	2020-08-03 16:52:07	36.96	22.3158	11.9555
413	2020-07-27 19:11:31	36.7149	26.3444	14.2941			413	2020-08-03 16:53:07	36.96	22.3158	11.9555
414	2020-07-27 19:12:31	36.7149	26.3444	14.2941			414	2020-08-03 16:54:07	36.96	22.3158	11.9555
415	2020-07-27 19:13:31	36.7149	26.2956	14.2654			415	2020-08-03 16:55:07	36.96	22.3158	11.9555
416	2020-07-27 19:14:31	36.7149	26.2223	14.2223			416	2020-08-03 16:56:07	36.96	22.3402	11.9721
417	2020-07-27 19:15:31	36.6877	26.1735	14.1705			417	2020-08-03 16:57:07	36.9872	22.3891	12.0278
418	2020-07-27 19:16:31	36.7149	26.1735	14.1935			418	2020-08-03 16:58:07	36.9872	22.3891	12.0278
419	2020-07-27 19:17:31	36.6877	26.1002	14.1272			419	2020-08-03 16:59:07	36.9872	22.3891	12.0278
420	2020-07-27 19:18:31	36.7149	26.0514	14.1212			420	2020-08-03 17:00:07	36.9872	22.4135	12.0444
421	2020-07-27 19:19:31	36.7149	26.0026	14.0922			421	2020-08-03 17:01:07	36.9872	22.4379	12.0609
422	2020-07-27 19:20:31	36.7149	26.0026	14.0922			422	2020-08-03 17:02:07	36.9872	22.4379	12.0609
423	2020-07-27 19:21:31	36.6877	25.9537	14.0403			423	2020-08-03 17:03:07	36.9872	22.4867	12.094
424	2020-07-27 19:22:31	36.7149	25.9293	14.0487			424	2020-08-03 17:04:07	36.9872	22.5111	12.1105
425	2020-07-27 19:23:31	36.6877	25.8805	13.9967			425	2020-08-03 17:05:07	36.9872	22.56	12.1434
426	2020-07-27 19:24:31	36.7149	25.9049	14.0341			426	2020-08-03 17:06:07	36.9872	22.56	12.1434
427	2020-07-27 19:25:31	36.7149	25.9049	14.0341			427	2020-08-03 17:07:07	36.9872	22.5844	12.1599
428	2020-07-27 19:26:31	36.7149	25.8561	14.005			428	2020-08-03 17:08:07	36.9872	22.5844	12.1599
429	2020-07-27 19:27:31	36.6877	25.8561	13.9821			429	2020-08-03 17:09:07	37.0145	22.6332	12.2153
430	2020-07-27 19:28:31	36.7149	25.8317	13.9904			430	2020-08-03 17:10:07	36.9872	22.6088	12.1763
431	2020-07-27 19:29:31	36.7149	25.8317	13.9904			431	2020-08-03 17:11:07	36.9872	22.6576	12.2091
432	2020-07-27 19:30:31	36.7149	25.7828	13.9612			432	2020-08-03 17:12:07	36.9872	22.7065	12.2419
433	2020-07-27 19:31:31	36.7149	25.7828	13.9612			433	2020-08-03 17:13:07	36.9872	22.7309	12.2582
434	2020-07-27 19:32:31	36.7149	25.7828	13.9612			434	2020-08-03 17:14:07	36.9872	22.7797	12.2909
435	2020-07-27 19:33:31	36.7149	25.7584	13.9466			435	2020-08-03 17:15:07	36.9872	22.7797	12.2909
436	2020-07-27 19:34:31	36.7421	25.7584	13.9695			436	2020-08-03 17:16:07	36.9872	22.853	12.3398
437	2020-07-27 19:35:31	36.7149	25.734	13.932			437	2020-08-03 17:17:07	36.9872	22.8774	12.3561
438	2020-07-27 19:36:31	36.7421	25.734	13.9549			438	2020-08-03 17:18:07	36.9872	22.9262	12.3885
439	2020-07-27 19:37:31	36.7149	25.734	13.932			439	2020-08-03 17:19:07	36.9872	22.9262	12.3885
440	2020-07-27 19:38:31	36.7149	25.734	13.932			440	2020-08-03 17:20:07	36.9872	22.975	12.421
441	2020-07-27 19:39:31	36.7421	25.6852	13.9256			441	2020-08-03 17:21:07	36.9872	22.9995	12.4371
442	2020-07-27 19:40:31	36.7421	25.734	13.9549			442	2020-08-03 17:22:07	36.9872	22.9995	12.4371
443	2020-07-27 19:41:31	36.7421	25.6852	13.9256			443	2020-08-03 17:23:07	36.9872	23.0239	12.4533
444	2020-07-27 19:42:31	36.7421	25.6852	13.9256			444	2020-08-03 17:24:07	36.96	23.0483	12.4468
445	2020-07-27 19:43:31	36.7421	25.6852	13.9256			445	2020-08-03 17:25:07	36.96	23.0483	12.4468
446	2020-07-27 19:44:31	36.7421	25.6852	13.9256			446	2020-08-03 17:26:07	36.96	23.0483	12.4468
447	2020-07-27 19:45:31	36.7421	25.6852	13.9256			447	2020-08-03 17:27:07	36.96	23.0971	12.4791
448	2020-07-27 19:46:31	36.7421	25.6607	13.9109			448	2020-08-03 17:28:07	36.96	23.0971	12.4791
449	2020-07-27 19:47:31	36.7421	25.6607	13.9109			449	2020-08-03 17:29:07	36.96	23.0971	12.4791
450	2020-07-27 19:48:31	36.7421	25.6607	13.9109			450	2020-08-03 17:30:07	36.96	23.0971	12.4791
451	2020-07-27 19:49:31	36.7421	25.6607	13.9109			451	2020-08-03 17:31:07	36.96	23.1215	12.4952
452	2020-07-27 19:50:31	36.7421	25.6607	13.9109			452	2020-08-03 17:32:07	36.96	23.1215	12.4952
453	2020-07-27 19:51:31	36.7421	25.6607	13.9109			453	2020-08-03 17:33:07	36.9872	23.1215	12.5179
454	2020-07-27 19:52:31	36.7421	25.6119	13.8815			454	2020-08-03 17:34:07	36.96	23.1459	12.5113
455	2020-07-27 19:53:31	36.7421	25.6119	13.8815			455	2020-08-03 17:35:07	36.9872	23.1459	12.534
456	2020-07-27 19:54:31	36.7421	25.6119	13.8815			456	2020-08-03 17:36:07	36.9872	23.2192	12.5822
457	2020-07-27 19:55:31	36.7421	25.6119	13.8815			457	2020-08-03 17:37:07	36.9872	23.2192	12.5822
458	2020-07-27 19:56:31	36.7421	25.6119	13.8815			458	2020-08-03 17:38:07	36.9872	23.268	12.6142
459	2020-07-27 19:57:31	36.7421	25.6119	13.8815			459	2020-08-03 17:39:07	36.9872	23.2924	12.6302
460	2020-07-27 19:58:31	36.7421	25.6119	13.8815			460	2020-08-03 17:40:07	37.0145	23.2924	12.6529
461	2020-07-27 19:59:31	36.7421	25.6119	13.8815			461	2020-08-03 17:41:07	37.0145	23.3413	12.6849
462	2020-07-27 20:00:31	36.7421	25.6119	13.8815			462	2020-08-03 17:42:07	37.0145	23.3413	12.6849
463	2020-07-27 20:01:31	36.7421	25.6119	13.8815			463	2020-08-03 17:43:07	37.0145	23.3413	12.6849
464	2020-07-27 20:02:31	36.7693	25.6607	13.9338			464	2020-08-03 17:44:07	37.0145	23.3657	12.7009
465	2020-07-27 20:03:31	36.7421	25.6119	13.8815			465	2020-08-03 17:45:07	37.0145	23.3657	12.7009
466	2020-07-27 20:04:31	36.7421	25.6607	13.9109			466	2020-08-03 17:46:07	37.0145	23.3413	12.6849
467	2020-07-27 20:05:31	36.7421	25.6607	13.9109			467	2020-08-03 17:47:07	37.0145	23.3169	12.6689
468	2020-07-27 20:06:31	36.7693	25.6607	13.9338			468	2020-08-03 17:48:07	37.0145	23.268	12.6369
469	2020-07-27 20:07:31	36.7693	25.6607	13.9338			469	2020-08-03 17:49:07	37.0145	23.268	12.6369
470	2020-07-27 20:08:31	36.7693	25.6607	13.9338			470	2020-08-03 17:50:07	36.9872	23.2436	12.5982
471	2020-07-27 20:09:31	36.7693	25.6607	13.9338			471	2020-08-03 17:51:07	36.9872	23.1704	12.55
472	2020-07-27 20:10:31	36.7693	25.6607	13.9338			472	2020-08-03 17:52:07	36.9872	23.1704	12.55
473	2020-07-27 20:11:31	36.7693	25.6119	13.9044			473	2020-08-03 17:53:07	36.9872	23.1459	12.534
474	2020-07-27 20:12:31	36.7421	25.6607	13.9109			474	2020-08-03 17:54:07	36.9872	23.1215	12.5179
475	2020-07-27 20:13:31	36.7693	25.6607	13.9338			475	2020-08-03 17:55:07	36.9872	23.1215	12.5179
476	2020-07-27 20:14:31	36.7421	25.6607	13.9109			476	2020-08-03 17:56:07	36.9872	23.1215	12.5179
477	2020-07-27 20:15:31	36.7421	25.6607	13.9109			477	2020-08-03 17:57:07	36.9872	23.0483	12.4695
478	2020-07-27 20:16:31	36.7421	25.6607	13.9109			478	2020-08-03 17:58:07	36.9872	23.0239	12.4533
479	2020-07-27 20:17:31	36.7421	25.6607	13.9109			479	2020-08-03 17:59:07	36.9872	22.9995	12.4371
480	2020-07-27 20:18:31	36.7421	25.6607	13.9109			480	2020-08-03 18:00:07	36.9872	22.9506	12.4048
481	2020-07-27 20:19:31	36.7149	25.6852	13.9027			481	2020-08-03 18:01:07	36.9872	22.9262	12.3885
482	2020-07-27 20:20:31	36.7149	25.6852	13.9027			482	2020-08-03 18:02:07	36.9872	22.8774	12.3561
483	2020-07-27 20:21:31	36.7149	25.6852	13.9027			483	2020-08-03 18:03:07	36.9872	22.8285	12.3235
484	2020-07-27 20:22:31	36.7421	25.6852	13.9256			484	2020-08-03 18:04:07	36.9872	22.7797	12.2909
485	2020-07-27 20:23:31	36.7421	25.6852	13.9256			485	2020-08-03 18:05:07	36.9872	22.7553	12.2746
486	2020-07-27 20:24:31	36.7421	25.6852	13.9256			486	2020-08-03 18:06:07	36.9872	22.682	12.2255
487	2020-07-27 20:25:31	36.7421	25.6852	13.9256			487	2020-08-03 18:07:07	36.9872	22.5844	12.1599
488	2020-07-27 20:26:31	36.7421	25.6852	13.9256			488	2020-08-03 18:08:07	36.9872	22.56	12.1434
489	2020-07-27 20:27:31	36.7421	25.6852	13.9256			489	2020-08-03 18:09:07	36.9872	22.5356	12.127
490	2020-07-27 20:28:31	36.7421	25.6852	13.9256			490	2020-08-03 18:10:07	36.9872	22.4623	12.0775
491	2020-07-27 20:29:31	36.7421	25.6607	13.9109			491	2020-08-03 18:11:07	36.9872	22.4379	12.0609
492	2020-07-27 20:30:31	36.7421	25.6607	13.9109			492	2020-08-03 18:12:07	36.9872	22.3891	12.0278
493	2020-07-27 20:31:31	36.7421	25.6119	13.8815			493	2020-08-03 18:13:07	36.9872	22.3158	11.9781
494	2020-07-27 20:32:31	36.7693	25.6119	13.9044			494	2020-08-03 18:14:07	36.9872	22.2426	11.9282
495	2020-07-27 20:33:31	36.7693	25.6119	13.9044			495	2020-08-03 18:15:07	36.9872	22.2182	11.9115
496	2020-07-27 20:34:31	36.7693	25.6119	13.9044			496	2020-08-03 18:16:07	36.9872	22.1205	11.8446
497	2020-07-27 20:35:31	36.7693	25.5875	13.8897			497	2020-08-03 18:17:07	36.9872	22.0717	11.8111
498	2020-07-27 20:36:31	36.7693	25.5875	13.8897			498	2020-08-03 18:18:07	36.9872	21.9984	11.7607
499	2020-07-27 20:37:31	36.7693	25.5875	13.8897			499	2020-08-03 18:19:07	36.9872	21.9496	11.727
500	2020-07-27 20:38:31	36.7693	25.5875	13.8897			500	2020-08-03 18:20:07	36.9872	21.8763	11.6764
501	2020-07-27 20:39:31	36.7693	25.6119	13.9044			501	2020-08-03 18:21:07	36.9872	21.8031	11.6256
502	2020-07-27 20:40:31	36.7693	25.6119	13.9044			502	2020-08-03 18:22:07	36.9872	21.7298	11.5746
503	2020-07-27 20:41:31	36.7693	25.6119	13.9044			503	2020-08-03 18:23:07	36.96	21.7054	11.5351
504	2020-07-27 20:42:31	36.7693	25.6607	13.9338			504	2020-08-03 18:24:07	36.9872	21.6322	11.5065
505	2020-07-27 20:43:31	36.7421	25.6119	13.8815			505	2020-08-03 18:25:07	36.9872	21.5589	11.4552
506	2020-07-27 20:44:31	36.7421	25.6607	13.9109			506	2020-08-03 18:26:07	36.9872	21.5345	11.438
507	2020-07-27 20:45:31	36.7693	25.6119	13.9044			507	2020-08-03 18:27:07	36.9872	21.4613	11.3865
508	2020-07-27 20:46:31	36.7693	25.6607	13.9338			508	2020-08-03 18:28:07	36.9872	21.4369	11.3693
509	2020-07-27 20:47:31	36.7421	25.6607	13.9109			509	2020-08-03 18:29:07	36.9872	21.4124	11.3521
510	2020-07-27 20:48:31	36.7421	25.6607	13.9109			510	2020-08-03 18:30:07	36.9872	21.3392	11.3003
511	2020-07-27 20:49:31	36.7421	25.6607	13.9109			511	2020-08-03 18:31:07	36.9872	21.3392	11.3003
512	2020-07-27 20:50:31	36.7421	25.6607	13.9109			512	2020-08-03 18:32:07	36.9872	21.3392	11.3003
513	2020-07-27 20:51:31	36.7421	25.6607	13.9109			513	2020-08-03 18:33:07	36.9872	21.2659	11.2484
514	2020-07-27 20:52:31	36.7149	25.6119	13.8587			514	2020-08-03 18:34:07	36.9872	21.2415	11.2311
515	2020-07-27 20:53:31	36.7149	25.6119	13.8587			515	2020-08-03 18:35:07	36.9872	21.1927	11.1963
516	2020-07-27 20:54:31	36.7149	25.6119	13.8587			516	2020-08-03 18:36:07	37.0145	21.1927	11.2188
517	2020-07-27 20:55:31	36.7149	25.5875	13.844			517	2020-08-03 18:37:07	36.9872	21.1927	11.1963
518	2020-07-27 20:56:31	36.7149	25.5875	13.844			518	2020-08-03 18:38:07	37.0145	21.1439	11.184
519	2020-07-27 20:57:31	36.7149	25.5875	13.844			519	2020-08-03 18:39:07	37.0145	21.1439	11.184
520	2020-07-27 20:58:31	36.7149	25.5631	13.8293			520	2020-08-03 18:40:07	37.0145	21.1195	11.1665
521	2020-07-27 20:59:31	36.7149	25.5631	13.8293			521	2020-08-03 18:41:07	37.0145	21.1195	11.1665
522	2020-07-27 21:00:31	36.7149	25.5631	13.8293			522	2020-08-03 18:42:07	37.0145	21.1195	11.1665
523	2020-07-27 21:01:31	36.7149	25.5143	13.7998			523	2020-08-03 18:43:07	37.0145	21.1439	11.184
524	2020-07-27 21:02:31	36.7149	25.5143	13.7998			524	2020-08-03 18:44:07	37.0145	21.1439	11.184
525	2020-07-27 21:03:31	36.7149	25.4898	13.785			525	2020-08-03 18:45:07	37.0145	21.1439	11.184
526	2020-07-27 21:04:31	36.7149	25.4654	13.7703			526	2020-08-03 18:46:07	37.0145	21.1439	11.184
527	2020-07-27 21:05:31	36.7149	25.4654	13.7703			527	2020-08-03 18:47:07	37.0145	21.1439	11.184
528	2020-07-27 21:06:31	36.7421	25.4166	13.7636			528	2020-08-03 18:48:07	37.0145	21.1927	11.2188
529	2020-07-27 21:07:31	36.7421	25.4166	13.7636			529	2020-08-03 18:49:07	37.0145	21.1927	11.2188
530	2020-07-27 21:08:31	36.7421	25.3922	13.7488			530	2020-08-03 18:50:07	37.0145	21.1927	11.2188
531	2020-07-27 21:09:31	36.7421	25.3922	13.7488			531	2020-08-03 18:51:07	37.0145	21.2171	11.2362
532	2020-07-27 21:10:31	36.7421	25.3433	13.7191			532	2020-08-03 18:52:07	37.0145	21.1927	11.2188
533	2020-07-27 21:11:31	36.7421	25.3433	13.7191			533	2020-08-03 18:53:07	37.0145	21.2171	11.2362
534	2020-07-27 21:12:31	36.7421	25.3433	13.7191			534	2020-08-03 18:54:07	37.0145	21.2415	11.2535
535	2020-07-27 21:13:31	36.7421	25.3189	13.7043			535	2020-08-03 18:55:07	37.0145	21.2415	11.2535
536	2020-07-27 21:14:31	36.7421	25.3189	13.7043			536	2020-08-03 18:56:07	37.0145	21.2904	11.2882
537	2020-07-27 21:15:31	36.7421	25.3433	13.7191			537	2020-08-03 18:57:07	37.0145	21.2904	11.2882
538	2020-07-27 21:16:31	36.7693	25.3189	13.7271			538	2020-08-03 18:58:07	37.0145	21.2415	11.2535
539	2020-07-27 21:17:31	36.7693	25.2945	13.7123			539	2020-08-03 18:59:07	37.0145	21.2415	11.2535
540	2020-07-27 21:18:31	36.7693	25.2945	13.7123			540	2020-08-03 19:00:07	37.0145	21.2904	11.2882
541	2020-07-27 21:19:31	36.7693	25.2457	13.6825			541	2020-08-03 19:01:07	37.0145	21.2904	11.2882
542	2020-07-27 21:20:31	36.7693	25.2457	13.6825			542	2020-08-03 19:02:07	37.0145	21.2904	11.2882
543	2020-07-27 21:21:31	36.7693	25.2213	13.6676			543	2020-08-03 19:03:07	37.0145	21.2904	11.2882
544	2020-07-27 21:22:31	36.7693	25.2213	13.6676			544	2020-08-03 19:04:07	37.0145	21.2904	11.2882
545	2020-07-27 21:23:31	36.7693	25.2457	13.6825			545	2020-08-03 19:05:07	37.0145	21.3148	11.3055
546	2020-07-27 21:24:31	36.7693	25.2213	13.6676			546	2020-08-03 19:06:07	37.0145	21.2904	11.2882
547	2020-07-27 21:25:31	36.7693	25.2457	13.6825			547	2020-08-03 19:07:07	37.0145	21.3148	11.3055
548	2020-07-27 21:26:31	36.7693	25.2213	13.6676			548	2020-08-03 19:08:07	37.0145	21.3148	11.3055
549	2020-07-27 21:27:31	36.7693	25.2213	13.6676			549	2020-08-03 19:09:07	37.0145	21.3148	11.3055
550	2020-07-27 21:28:31	36.7693	25.2457	13.6825			550	2020-08-03 19:10:07	37.0145	21.3392	11.3228
551	2020-07-27 21:29:31	36.7693	25.2457	13.6825			551	2020-08-03 19:11:07	37.0145	21.3148	11.3055
552	2020-07-27 21:30:31	36.7693	25.2457	13.6825			552	2020-08-03 19:12:07	37.0145	21.3392	11.3228
553	2020-07-27 21:31:31	36.7693	25.2945	13.7123			553	2020-08-03 19:13:07	37.0145	21.3392	11.3228
554	2020-07-27 21:32:31	36.7693	25.3189	13.7271			554	2020-08-03 19:14:07	36.9872	21.3148	11.2831
555	2020-07-27 21:33:31	36.7693	25.3189	13.7271			555	2020-08-03 19:15:07	36.9872	21.3148	11.2831
556	2020-07-27 21:34:31	36.7693	25.3189	13.7271			556	2020-08-03 19:16:07	36.9872	21.2904	11.2658
557	2020-07-27 21:35:31	36.7693	25.3922	13.7716			557	2020-08-03 19:17:07	36.9872	21.2659	11.2484
558	2020-07-27 21:36:31	36.7693	25.4166	13.7864			558	2020-08-03 19:18:07	36.9872	21.2659	11.2484
559	2020-07-27 21:37:31	36.7693	25.4898	13.8308			559	2020-08-03 19:19:07	36.9872	21.2659	11.2484
560	2020-07-27 21:38:31	36.7693	25.5143	13.8455			560	2020-08-03 19:20:07	36.9872	21.2659	11.2484
561	2020-07-27 21:39:31	36.7965	25.5875	13.9126			561	2020-08-03 19:21:07	36.9872	21.2415	11.2311
562	2020-07-27 21:40:31	36.7965	25.6119	13.9273			562	2020-08-03 19:22:07	36.9872	21.2415	11.2311
563	2020-07-27 21:41:31	36.7965	25.6852	13.9714			563	2020-08-03 19:23:07	36.9872	21.1927	11.1963
564	2020-07-27 21:42:31	36.7965	25.7584	14.0153			564	2020-08-03 19:24:07	36.9872	21.1927	11.1963
565	2020-07-27 21:43:31	36.7965	25.7828	14.0299			565	2020-08-03 19:25:07	36.9872	21.1927	11.1963
566	2020-07-27 21:44:31	36.7965	25.8561	14.0737			566	2020-08-03 19:26:07	36.96	21.1683	11.1565
567	2020-07-27 21:45:31	36.7965	25.8805	14.0883			567	2020-08-03 19:27:07	36.96	21.1195	11.1217
568	2020-07-27 21:46:31	36.7965	25.9537	14.132			568	2020-08-03 19:28:07	36.96	21.1195	11.1217
569	2020-07-27 21:47:31	36.7965	25.9781	14.1465			569	2020-08-03 19:29:07	36.96	21.095	11.1043
570	2020-07-27 21:48:31	36.7965	26.0026	14.161			570	2020-08-03 19:30:07	36.96	21.095	11.1043
571	2020-07-27 21:49:31	36.7965	26.027	14.1755			571	2020-08-03 19:31:07	36.96	21.0706	11.0868
572	2020-07-27 21:50:31	36.7965	26.1246	14.2334			572	2020-08-03 19:32:07	36.96	21.0706	11.0868
573	2020-07-27 21:51:31	36.7965	26.1246	14.2334			573	2020-08-03 19:33:07	36.9872	21.0706	11.1092
574	2020-07-27 21:52:31	36.7965	26.1491	14.2478			574	2020-08-03 19:34:07	36.9872	21.0218	11.0742
575	2020-07-27 21:53:31	36.7965	26.1735	14.2623			575	2020-08-03 19:35:07	36.9872	20.9974	11.0567
576	2020-07-27 21:54:31	36.7965	26.1735	14.2623			576	2020-08-03 19:36:07	36.9872	21.0218	11.0742
577	2020-07-27 21:55:31	36.7965	26.1979	14.2767			577	2020-08-03 19:37:07	36.9872	20.9974	11.0567
578	2020-07-27 21:56:31	36.7965	26.2223	14.2911			578	2020-08-03 19:38:07	36.9872	20.9974	11.0567
579	2020-07-27 21:57:31	36.7965	26.2223	14.2911			579	2020-08-03 19:39:07	36.9872	20.9974	11.0567
580	2020-07-27 21:58:31	36.7965	26.2711	14.3199			580	2020-08-03 19:40:07	36.9872	20.9974	11.0567
581	2020-07-27 21:59:31	36.7965	26.2711	14.3199			581	2020-08-03 19:41:07	36.9872	21.0218	11.0742
582	2020-07-27 22:00:31	36.7965	26.2711	14.3199			582	2020-08-03 19:42:07	36.9872	21.0218	11.0742
583	2020-07-27 22:01:31	36.7965	26.2711	14.3199			583	2020-08-03 19:43:07	36.9872	21.0218	11.0742
584	2020-07-27 22:02:31	36.7965	26.3444	14.363			584	2020-08-03 19:44:07	36.9872	21.0218	11.0742
585	2020-07-27 22:03:31	36.7965	26.3444	14.363			585	2020-08-03 19:45:07	36.9872	21.0706	11.1092
586	2020-07-27 22:04:31	36.7965	26.3688	14.3773			586	2020-08-03 19:46:07	36.9872	21.0218	11.0742
587	2020-07-27 22:05:31	36.7693	26.3932	14.3687			587	2020-08-03 19:47:07	36.9872	21.095	11.1267
588	2020-07-27 22:06:31	36.7693	26.442	14.3973			588	2020-08-03 19:48:07	36.9872	21.095	11.1267
589	2020-07-27 22:07:31	36.7693	26.442	14.3973			589	2020-08-03 19:49:07	36.9872	21.095	11.1267
590	2020-07-27 22:08:31	36.7693	26.4665	14.4116			590	2020-08-03 19:50:07	36.9872	21.095	11.1267
591	2020-07-27 22:09:31	36.7693	26.4909	14.4258			591	2020-08-03 19:51:07	36.9872	21.095	11.1267
592	2020-07-27 22:10:31	36.7421	26.5397	14.4314			592	2020-08-03 19:52:07	36.9872	21.095	11.1267
593	2020-07-27 22:11:31	36.7421	26.5641	14.4456			593	2020-08-03 19:53:07	36.9872	21.1195	11.1441
594	2020-07-27 22:12:31	36.7421	26.5641	14.4456			594	2020-08-03 19:54:07	36.9872	21.1195	11.1441
595	2020-07-27 22:13:31	36.7693	26.613	14.4971			595	2020-08-03 19:55:07	36.9872	21.095	11.1267
596	2020-07-27 22:14:31	36.7421	26.6374	14.4883			596	2020-08-03 19:56:07	37.0145	21.1195	11.1665
597	2020-07-27 22:15:31	36.7421	26.6374	14.4883			597	2020-08-03 19:57:07	37.0145	21.1195	11.1665
598	2020-07-27 22:16:31	36.7693	26.6374	14.5113			598	2020-08-03 19:58:07	37.0145	21.1195	11.1665
599	2020-07-27 22:17:31	36.7421	26.6618	14.5025			599	2020-08-03 19:59:07	37.0145	21.1195	11.1665
600	2020-07-27 22:18:31	36.7693	26.7106	14.5538			600	2020-08-03 20:00:07	37.0145	21.1195	11.1665
601	2020-07-27 22:19:31	36.7693	26.7106	14.5538			601	2020-08-03 20:01:07	37.0145	21.1195	11.1665
602	2020-07-27 22:20:31	36.7693	26.735	14.568			602	2020-08-03 20:02:07	37.0145	21.1195	11.1665
603	2020-07-27 22:21:31	36.7693	26.7839	14.5963			603	2020-08-03 20:03:07	37.0145	21.0706	11.1316
604	2020-07-27 22:22:31	36.7421	26.7839	14.5733			604	2020-08-03 20:04:07	37.0418	21.0706	11.154
605	2020-07-27 22:23:31	36.7421	26.8327	14.6015			605	2020-08-03 20:05:07	37.0145	21.0462	11.1141
606	2020-07-27 22:24:31	36.7421	26.8327	14.6015			606	2020-08-03 20:06:07	37.0418	21.0218	11.119
607	2020-07-27 22:25:31	36.7693	26.8815	14.6527			607	2020-08-03 20:07:07	37.0418	21.0218	11.119
608	2020-07-27 22:26:31	36.7693	26.9059	14.6668			608	2020-08-03 20:08:07	37.0418	20.973	11.084
609	2020-07-27 22:27:31	36.7693	26.9059	14.6668			609	2020-08-03 20:09:07	37.0418	20.9485	11.0664
610	2020-07-27 22:28:31	36.7693	26.9304	14.6809			610	2020-08-03 20:10:07	37.0418	20.8997	11.0312
611	2020-07-27 22:29:31	36.7693	26.9792	14.709			611	2020-08-03 20:11:07	37.0418	20.8997	11.0312
612	2020-07-27 22:30:31	36.7693	27.0036	14.723			612	2020-08-03 20:12:07	37.0145	20.8509	10.9736
613	2020-07-27 22:31:31	36.7693	27.0524	14.7511			613	2020-08-03 20:13:07	37.0418	20.7776	10.943
614	2020-07-27 22:32:31	36.7693	27.0768	14.7651			614	2020-08-03 20:14:07	37.0418	20.7532	10.9253
615	2020-07-27 22:33:31	36.7693	27.1013	14.7791			615	2020-08-03 20:15:07	37.0418	20.6311	10.8365
616	2020-07-27 22:34:31	36.7693	27.1501	14.807			616	2020-08-03 20:16:07	37.0145	20.6311	10.8141
617	2020-07-27 22:35:31	36.7693	27.1745	14.821			617	2020-08-03 20:17:07	37.0145	20.5823	10.7785
618	2020-07-27 22:36:31	36.7965	27.1745	14.8441			618	2020-08-03 20:18:07	37.0145	20.5091	10.7248
619	2020-07-27 22:37:31	36.7965	27.2233	14.872			619	2020-08-03 20:19:07	37.0145	20.4602	10.689
620	2020-07-27 22:38:31	36.7965	27.2233	14.872			620	2020-08-03 20:20:07	37.0145	20.4114	10.6531
621	2020-07-27 22:39:31	36.7965	27.2722	14.8998			621	2020-08-03 20:21:07	37.0145	20.4114	10.6531
622	2020-07-27 22:40:31	36.7965	27.2478	14.8859			622	2020-08-03 20:22:07	37.0145	20.3626	10.6171
623	2020-07-27 22:41:31	36.7965	27.2722	14.8998			623	2020-08-03 20:23:07	37.0145	20.3382	10.5991
624	2020-07-27 22:42:31	36.7693	27.321	14.9045			624	2020-08-03 20:24:07	37.0145	20.3137	10.5811
625	2020-07-27 22:43:31	36.7693	27.321	14.9045			625	2020-08-03 20:25:07	37.0145	20.2649	10.5449
626	2020-07-27 22:44:31	36.7693	27.3454	14.9184			626	2020-08-03 20:26:07	37.0145	20.2649	10.5449
627	2020-07-27 22:45:31	36.7693	27.3454	14.9184			627	2020-08-03 20:27:07	37.0145	20.2405	10.5268
628	2020-07-27 22:46:31	36.7693	27.3454	14.9184			628	2020-08-03 20:28:07	37.0145	20.1917	10.4906
629	2020-07-27 22:47:31	36.7693	27.3698	14.9323			629	2020-08-03 20:29:07	37.0145	20.1917	10.4906
630	2020-07-27 22:48:31	36.7693	27.4187	14.96			630	2020-08-03 20:30:07	37.0145	20.1917	10.4906
631	2020-07-27 22:49:31	36.7693	27.4187	14.96			631	2020-08-03 20:31:07	37.0418	20.1672	10.4947
632	2020-07-27 22:50:31	36.7693	27.4187	14.96			632	2020-08-03 20:32:07	37.0145	20.1672	10.4724
633	2020-07-27 22:51:31	36.7693	27.4431	14.9739			633	2020-08-03 20:33:07	37.0145	20.1672	10.4724
634	2020-07-27 22:52:31	36.7693	27.4431	14.9739			634	2020-08-03 20:34:07	37.0418	20.1428	10.4766
635	2020-07-27 22:53:31	36.7693	27.4919	15.0015			635	2020-08-03 20:35:07	37.0145	20.1672	10.4724
636	2020-07-27 22:54:31	36.7693	27.4919	15.0015			636	2020-08-03 20:36:07	37.0418	20.1672	10.4947
637	2020-07-27 22:55:31	36.7693	27.5163	15.0153			637	2020-08-03 20:37:07	37.0418	20.094	10.4402
638	2020-07-27 22:56:31	36.7693	27.5163	15.0153			638	2020-08-03 20:38:07	37.0145	20.1428	10.4543
639	2020-07-27 22:57:31	36.7693	27.5407	15.0291			639	2020-08-03 20:39:07	37.0145	20.1428	10.4543
640	2020-07-27 22:58:31	36.7693	27.5407	15.0291			640	2020-08-03 20:40:07	37.0418	20.1428	10.4766
641	2020-07-27 22:59:31	36.7693	27.5896	15.0567			641	2020-08-03 20:41:07	37.0418	20.094	10.4402
642	2020-07-27 23:00:31	36.7693	27.614	15.0705			642	2020-08-03 20:42:07	37.0418	20.094	10.4402
643	2020-07-27 23:01:31	36.7693	27.614	15.0705			643	2020-08-03 20:43:07	37.0418	20.1428	10.4766
644	2020-07-27 23:02:31	36.7421	27.6628	15.0749			644	2020-08-03 20:44:07	37.0418	20.1428	10.4766
645	2020-07-27 23:03:31	36.7421	27.6872	15.0886			645	2020-08-03 20:45:07	37.0691	20.094	10.4625
646	2020-07-27 23:04:31	36.7421	27.6872	15.0886			646	2020-08-03 20:46:07	37.0691	20.094	10.4625
647	2020-07-27 23:05:31	36.7421	27.7117	15.1023			647	2020-08-03 20:47:07	37.0691	20.094	10.4625
648	2020-07-27 23:06:31	36.7421	27.7605	15.1297			648	2020-08-03 20:48:07	37.0691	20.094	10.4625
649	2020-07-27 23:07:31	36.7149	27.7849	15.1203			649	2020-08-03 20:49:07	37.0691	20.094	10.4625
650	2020-07-27 23:08:31	36.7421	27.8093	15.1571			650	2020-08-03 20:50:07	37.0691	20.094	10.4625
651	2020-07-27 23:09:31	36.7149	27.8581	15.1613			651	2020-08-03 20:51:07	37.0691	20.094	10.4625
652	2020-07-27 23:10:31	36.7149	27.8581	15.1613			652	2020-08-03 20:52:07	37.0691	20.0696	10.4442
653	2020-07-27 23:11:31	36.7149	27.8826	15.175			653	2020-08-03 20:53:07	37.0691	20.094	10.4625
654	2020-07-27 23:12:31	36.7149	27.8826	15.175			654	2020-08-03 20:54:07	37.0691	20.094	10.4625
655	2020-07-27 23:13:31	36.7421	27.9314	15.2253			655	2020-08-03 20:55:07	37.0691	20.0696	10.4442
656	2020-07-27 23:14:31	36.7421	27.9314	15.2253			656	2020-08-03 20:56:07	37.0691	20.094	10.4625
657	2020-07-27 23:15:31	36.7421	27.9314	15.2253			657	2020-08-03 20:57:07	37.0691	20.0696	10.4442
658	2020-07-27 23:16:31	36.7421	27.9558	15.239			658	2020-08-03 20:58:07	37.0691	20.0696	10.4442
659	2020-07-27 23:17:31	36.7421	27.9558	15.239			659	2020-08-03 20:59:07	37.0691	20.094	10.4625
660	2020-07-27 23:18:31	36.7421	27.9558	15.239			660	2020-08-03 21:00:07	37.0965	20.094	10.4848
661	2020-07-27 23:19:31	36.7421	27.9558	15.239			661	2020-08-03 21:01:07	37.0965	20.094	10.4848
662	2020-07-27 23:20:31	36.7421	27.9558	15.239			662	2020-08-03 21:02:07	37.0965	20.0452	10.4483
663	2020-07-27 23:21:31	36.7421	27.9558	15.239			663	2020-08-03 21:03:07	37.0965	20.0452	10.4483
664	2020-07-27 23:22:31	36.7421	27.9558	15.239			664	2020-08-03 21:04:07	37.0965	20.0452	10.4483
665	2020-07-27 23:23:31	36.7421	27.9558	15.239			665	2020-08-03 21:05:07	37.0965	20.094	10.4848
666	2020-07-27 23:24:31	36.7421	27.9558	15.239			666	2020-08-03 21:06:07	37.0965	20.094	10.4848
667	2020-07-27 23:25:31	36.7421	27.9558	15.239			667	2020-08-03 21:07:07	37.0965	20.094	10.4848
668	2020-07-27 23:26:31	36.7421	27.9558	15.239			668	2020-08-03 21:08:07	37.1238	20.094	10.5071
669	2020-07-27 23:27:31	36.7421	27.9314	15.2253			669	2020-08-03 21:09:07	37.1238	20.1184	10.5253
670	2020-07-27 23:28:31	36.7421	27.9558	15.239			670	2020-08-03 21:10:07	37.0965	20.1184	10.503
671	2020-07-27 23:29:31	36.7421	27.9558	15.239			671	2020-08-03 21:11:07	37.0965	20.1428	10.5212
672	2020-07-27 23:30:31	36.7421	27.9558	15.239			672	2020-08-03 21:12:07	37.0965	20.1917	10.5575
673	2020-07-27 23:31:31	36.7421	27.9558	15.239			673	2020-08-03 21:13:07	37.0965	20.1917	10.5575
674	2020-07-27 23:32:31	36.7421	27.9558	15.239			674	2020-08-03 21:14:07	37.0965	20.1917	10.5575
675	2020-07-27 23:33:31	36.7421	27.9558	15.239			675	2020-08-03 21:15:07	37.0965	20.1917	10.5575
676	2020-07-27 23:34:31	36.7421	27.9558	15.239			676	2020-08-03 21:16:07	37.0965	20.1917	10.5575
677	2020-07-27 23:35:31	36.7421	27.9558	15.239			677	2020-08-03 21:17:07	37.1238	20.2161	10.598
678	2020-07-27 23:36:31	36.7421	27.9314	15.2253			678	2020-08-03 21:18:07	37.0965	20.2405	10.5938
679	2020-07-27 23:37:31	36.7693	27.9558	15.2621			679	2020-08-03 21:19:07	37.0965	20.2893	10.63
680	2020-07-27 23:38:31	36.7693	27.9558	15.2621			680	2020-08-03 21:20:07	37.1238	20.2405	10.6162
681	2020-07-27 23:39:31	36.7693	27.9314	15.2485			681	2020-08-03 21:21:07	37.0965	20.2405	10.5938
682	2020-07-27 23:40:31	36.7693	27.9558	15.2621			682	2020-08-03 21:22:07	37.0965	20.2405	10.5938
683	2020-07-27 23:41:31	36.7693	27.9558	15.2621			683	2020-08-03 21:23:07	37.0965	20.2893	10.63
684	2020-07-27 23:42:31	36.7693	27.9558	15.2621			684	2020-08-03 21:24:07	37.0965	20.2893	10.63
685	2020-07-27 23:43:31	36.7693	27.9314	15.2485			685	2020-08-03 21:25:07	37.0965	20.2893	10.63
686	2020-07-27 23:44:31	36.7693	27.9558	15.2621			686	2020-08-03 21:26:07	37.0965	20.3137	10.6481
687	2020-07-27 23:45:31	36.7693	27.9558	15.2621			687	2020-08-03 21:27:07	37.0965	20.3626	10.6841
688	2020-07-27 23:46:31	36.7693	27.9558	15.2621			688	2020-08-03 21:28:07	37.0965	20.3137	10.6481
689	2020-07-27 23:47:31	36.7421	27.9558	15.239			689	2020-08-03 21:29:07	37.0691	20.3626	10.6618
690	2020-07-27 23:48:31	36.7693	27.9802	15.2757			690	2020-08-03 21:30:07	37.0691	20.3626	10.6618
691	2020-07-27 23:49:31	36.7421	27.9802	15.2526			691	2020-08-03 21:31:07	37.0691	20.387	10.6798
692	2020-07-27 23:50:31	36.7421	27.9802	15.2526			692	2020-08-03 21:32:07	37.0691	20.387	10.6798
693	2020-07-27 23:51:31	36.7421	28.0291	15.2797			693	2020-08-03 21:33:07	37.0691	20.4114	10.6978
694	2020-07-27 23:52:31	36.7421	28.0535	15.2933			694	2020-08-03 21:34:07	37.0691	20.4114	10.6978
695	2020-07-27 23:53:31	36.7421	28.0535	15.2933			695	2020-08-03 21:35:07	37.0691	20.4114	10.6978
696	2020-07-27 23:54:31	36.7421	28.0535	15.2933			696	2020-08-03 21:36:07	37.0691	20.4358	10.7158
697	2020-07-27 23:55:31	36.7421	28.1023	15.3204			697	2020-08-03 21:37:07	37.0691	20.4358	10.7158
698	2020-07-27 23:56:31	36.7421	28.1023	15.3204			698	2020-08-03 21:38:07	37.0691	20.4602	10.7337
699	2020-07-27 23:57:31	36.7421	28.1023	15.3204			699	2020-08-03 21:39:07	37.0691	20.4602	10.7337
700	2020-07-27 23:58:31	36.7421	28.1267	15.334			700	2020-08-03 21:40:07	37.0691	20.5091	10.7696
701	2020-07-27 23:59:31	36.7421	28.1511	15.3475			701	2020-08-03 21:41:07	37.0418	20.5091	10.7472
702	2020-07-28 00:00:31	36.7421	28.1511	15.3475			702	2020-08-03 21:42:07	37.0418	20.5091	10.7472
703	2020-07-28 00:01:31	36.7421	28.1511	15.3475			703	2020-08-03 21:43:07	37.0418	20.5335	10.7651
704	2020-07-28 00:02:31	36.7421	28.2	15.3746			704	2020-08-03 21:44:07	37.0418	20.5335	10.7651
705	2020-07-28 00:03:31	36.7421	28.1511	15.3475			705	2020-08-03 21:45:07	37.0418	20.5335	10.7651
706	2020-07-28 00:04:31	36.7421	28.2	15.3746			706	2020-08-03 21:46:07	37.0418	20.5823	10.8008
707	2020-07-28 00:05:31	36.7421	28.2	15.3746			707	2020-08-03 21:47:07	37.0145	20.5823	10.7785
708	2020-07-28 00:06:31	36.7421	28.2	15.3746			708	2020-08-03 21:48:07	37.0145	20.5823	10.7785
709	2020-07-28 00:07:31	36.7421	28.2	15.3746			709	2020-08-03 21:49:07	37.0145	20.6311	10.8141
710	2020-07-28 00:08:31	36.7421	28.2	15.3746			710	2020-08-03 21:50:07	37.0145	20.6311	10.8141
711	2020-07-28 00:09:31	36.7693	28.2	15.3977			711	2020-08-03 21:51:07	37.0145	20.6311	10.8141
712	2020-07-28 00:10:31	36.7693	28.2	15.3977			712	2020-08-03 21:52:07	37.0145	20.6311	10.8141
713	2020-07-28 00:11:31	36.7693	28.2244	15.4112			713	2020-08-03 21:53:07	37.0145	20.68	10.8497
714	2020-07-28 00:12:31	36.7693	28.2244	15.4112			714	2020-08-03 21:54:07	36.9872	20.68	10.8273
715	2020-07-28 00:13:31	36.7693	28.2244	15.4112			715	2020-08-03 21:55:07	37.0145	20.6311	10.8141
716	2020-07-28 00:14:31	36.7693	28.2244	15.4112			716	2020-08-03 21:56:07	36.9872	20.6556	10.8095
717	2020-07-28 00:15:31	36.7693	28.2488	15.4247			717	2020-08-03 21:57:07	37.0145	20.68	10.8497
718	2020-07-28 00:16:31	36.7693	28.2488	15.4247			718	2020-08-03 21:58:07	37.0145	20.7044	10.8674
719	2020-07-28 00:17:31	36.7693	28.2488	15.4247			719	2020-08-03 21:59:07	37.0145	20.7044	10.8674
720	2020-07-28 00:18:31	36.7693	28.2488	15.4247			720	2020-08-03 22:00:07	37.0145	20.68	10.8497
721	2020-07-28 00:19:31	36.7693	28.2488	15.4247			721	2020-08-03 22:01:07	36.9872	20.68	10.8273
722	2020-07-28 00:20:31	36.7693	28.2976	15.4517			722	2020-08-03 22:02:07	37.0145	20.68	10.8497
723	2020-07-28 00:21:31	36.7693	28.322	15.4651			723	2020-08-03 22:03:07	37.0145	20.68	10.8497
724	2020-07-28 00:22:31	36.7693	28.322	15.4651			724	2020-08-03 22:04:07	37.0145	20.68	10.8497
725	2020-07-28 00:23:31	36.7693	28.322	15.4651			725	2020-08-03 22:05:07	37.0145	20.68	10.8497
726	2020-07-28 00:24:31	36.7693	28.322	15.4651			726	2020-08-03 22:06:07	37.0145	20.68	10.8497
727	2020-07-28 00:25:31	36.7693	28.3709	15.492			727	2020-08-03 22:07:07	37.0145	20.7044	10.8674
728	2020-07-28 00:26:31	36.7693	28.3709	15.492			728	2020-08-03 22:08:07	37.0145	20.7044	10.8674
729	2020-07-28 00:27:31	36.7693	28.3709	15.492			729	2020-08-03 22:09:07	37.0145	20.68	10.8497
730	2020-07-28 00:28:31	36.7693	28.3709	15.492			730	2020-08-03 22:10:07	37.0145	20.7044	10.8674
731	2020-07-28 00:29:31	36.7693	28.3953	15.5055			731	2020-08-03 22:11:07	37.0145	20.68	10.8497
732	2020-07-28 00:30:31	36.7693	28.3953	15.5055			732	2020-08-03 22:12:07	37.0145	20.68	10.8497
733	2020-07-28 00:31:31	36.7693	28.3953	15.5055			733	2020-08-03 22:13:07	37.0418	20.68	10.872
734	2020-07-28 00:32:31	36.7693	28.4197	15.5189			734	2020-08-03 22:14:07	37.0418	20.68	10.872
735	2020-07-28 00:33:31	36.7693	28.4197	15.5189			735	2020-08-03 22:15:07	37.0418	20.68	10.872
736	2020-07-28 00:34:31	36.7693	28.4197	15.5189			736	2020-08-03 22:16:07	37.0418	20.68	10.872
737	2020-07-28 00:35:31	36.7693	28.4685	15.5457			737	2020-08-03 22:17:07	37.0418	20.68	10.872
738	2020-07-28 00:36:31	36.7693	28.4685	15.5457			738	2020-08-03 22:18:07	37.0418	20.7044	10.8898
739	2020-07-28 00:37:31	36.7693	28.4685	15.5457			739	2020-08-03 22:19:07	37.0418	20.7044	10.8898
740	2020-07-28 00:38:31	36.7693	28.493	15.5591			740	2020-08-03 22:20:07	37.0418	20.7044	10.8898
741	2020-07-28 00:39:31	36.7693	28.493	15.5591			741	2020-08-03 22:21:07	37.0418	20.7044	10.8898
742	2020-07-28 00:40:31	36.7693	28.493	15.5591			742	2020-08-03 22:22:07	37.0418	20.68	10.872
743	2020-07-28 00:41:31	36.7693	28.5174	15.5725			743	2020-08-03 22:23:07	37.0418	20.7044	10.8898
744	2020-07-28 00:42:31	36.7693	28.5174	15.5725			744	2020-08-03 22:24:07	37.0418	20.7044	10.8898
745	2020-07-28 00:43:31	36.7693	28.5174	15.5725			745	2020-08-03 22:25:07	37.0691	20.7044	10.9122
746	2020-07-28 00:44:31	36.7965	28.5174	15.5957			746	2020-08-03 22:26:07	37.0691	20.68	10.8944
747	2020-07-28 00:45:31	36.7965	28.5174	15.5957			747	2020-08-03 22:27:07	37.0691	20.7044	10.9122
748	2020-07-28 00:46:31	36.7965	28.5174	15.5957			748	2020-08-03 22:28:07	37.0691	20.7044	10.9122
749	2020-07-28 00:47:31	36.7965	28.5174	15.5957			749	2020-08-03 22:29:07	37.0691	20.68	10.8944
750	2020-07-28 00:48:31	36.7693	28.5174	15.5725			750	2020-08-03 22:30:07	37.0691	20.7044	10.9122
751	2020-07-28 00:49:31	36.7965	28.5174	15.5957			751	2020-08-03 22:31:07	37.0691	20.7044	10.9122
752	2020-07-28 00:50:31	36.7693	28.5174	15.5725			752	2020-08-03 22:32:07	37.0691	20.7044	10.9122
753	2020-07-28 00:51:31	36.7693	28.5174	15.5725			753	2020-08-03 22:33:07	37.0965	20.7288	10.9523
754	2020-07-28 00:52:31	36.7693	28.5174	15.5725			754	2020-08-03 22:34:07	37.0691	20.7044	10.9122
755	2020-07-28 00:53:31	36.7693	28.5174	15.5725			755	2020-08-03 22:35:07	37.0691	20.7288	10.9299
756	2020-07-28 00:54:31	36.7693	28.5662	15.5992			756	2020-08-03 22:36:07	37.0691	20.7532	10.9477
757	2020-07-28 00:55:31	36.7693	28.5174	15.5725			757	2020-08-03 22:37:07	37.0691	20.7532	10.9477
758	2020-07-28 00:56:31	36.7421	28.5662	15.576			758	2020-08-03 22:38:07	37.0691	20.7532	10.9477
759	2020-07-28 00:57:31	36.7421	28.5174	15.5493			759	2020-08-03 22:39:07	37.0691	20.7532	10.9477
760	2020-07-28 00:58:31	36.7421	28.5174	15.5493			760	2020-08-03 22:40:07	37.0691	20.8021	10.9831
761	2020-07-28 00:59:31	36.7421	28.5174	15.5493			761	2020-08-03 22:41:07	37.0691	20.8021	10.9831
762	2020-07-28 01:00:31	36.7421	28.5174	15.5493			762	2020-08-03 22:42:07	37.0691	20.8021	10.9831
763	2020-07-28 01:01:31	36.7421	28.5174	15.5493			763	2020-08-03 22:43:07	37.0418	20.8021	10.9607
764	2020-07-28 01:02:31	36.7421	28.493	15.5359			764	2020-08-03 22:44:07	37.0418	20.8509	10.996
765	2020-07-28 01:03:31	36.7421	28.493	15.5359			765	2020-08-03 22:45:07	37.0418	20.8753	11.0136
766	2020-07-28 01:04:31	36.7421	28.493	15.5359			766	2020-08-03 22:46:07	37.0418	20.8997	11.0312
767	2020-07-28 01:05:31	36.7421	28.493	15.5359			767	2020-08-03 22:47:07	37.0145	20.9485	11.044
768	2020-07-28 01:06:31	36.7421	28.4685	15.5225			768	2020-08-03 22:48:07	37.0418	20.973	11.084
769	2020-07-28 01:07:31	36.7421	28.4685	15.5225			769	2020-08-03 22:49:07	37.0418	20.973	11.084
770	2020-07-28 01:08:31	36.7421	28.4685	15.5225			770	2020-08-03 22:50:07	37.0145	21.0218	11.0966
771	2020-07-28 01:09:31	36.7421	28.4685	15.5225			771	2020-08-03 22:51:07	37.0145	21.0462	11.1141
772	2020-07-28 01:10:31	36.7421	28.4685	15.5225			772	2020-08-03 22:52:07	37.0418	21.0462	11.1366
773	2020-07-28 01:11:31	36.7693	28.4197	15.5189			773	2020-08-03 22:53:07	37.0418	21.0706	11.154
774	2020-07-28 01:12:31	36.7421	28.4197	15.4957			774	2020-08-03 22:54:07	37.0418	21.0706	11.154
775	2020-07-28 01:13:31	36.7693	28.4197	15.5189			775	2020-08-03 22:55:07	37.0418	21.0706	11.154
776	2020-07-28 01:14:31	36.7693	28.4197	15.5189			776	2020-08-03 22:56:07	37.0691	21.1195	11.2114
777	2020-07-28 01:15:31	36.7693	28.3953	15.5055			777	2020-08-03 22:57:07	37.0691	21.1195	11.2114
778	2020-07-28 01:16:31	36.7693	28.3953	15.5055			778	2020-08-03 22:58:07	37.0418	21.1195	11.189
779	2020-07-28 01:17:31	36.7693	28.3709	15.492			779	2020-08-03 22:59:07	37.0418	21.1439	11.2064
780	2020-07-28 01:18:31	36.7965	28.322	15.4883			780	2020-08-03 23:00:07	37.0418	21.1927	11.2412
781	2020-07-28 01:19:31	36.7693	28.322	15.4651			781	2020-08-03 23:01:07	37.0418	21.2171	11.2586
782	2020-07-28 01:20:31	36.7965	28.2976	15.4748			782	2020-08-03 23:02:07	37.0418	21.2415	11.276
783	2020-07-28 01:21:31	36.7965	28.2488	15.4479			783	2020-08-03 23:03:07	37.0418	21.2904	11.3107
784	2020-07-28 01:22:31	36.7965	28.2732	15.4614			784	2020-08-03 23:04:07	37.0418	21.2904	11.3107
785	2020-07-28 01:23:31	36.7965	28.2732	15.4614			785	2020-08-03 23:05:07	37.0418	21.2904	11.3107
786	2020-07-28 01:24:31	36.7965	28.2488	15.4479			786	2020-08-03 23:06:07	37.0418	21.3148	11.328
787	2020-07-28 01:25:31	36.7965	28.2488	15.4479			787	2020-08-03 23:07:07	37.0418	21.3392	11.3453
788	2020-07-28 01:26:31	36.7965	28.2244	15.4344			788	2020-08-03 23:08:07	37.0418	21.4124	11.397
789	2020-07-28 01:27:31	36.7965	28.2488	15.4479			789	2020-08-03 23:09:07	37.0418	21.4124	11.397
790	2020-07-28 01:28:31	36.7965	28.2244	15.4344			790	2020-08-03 23:10:07	37.0418	21.4613	11.4315
791	2020-07-28 01:29:31	36.7965	28.2244	15.4344			791	2020-08-03 23:11:07	37.0418	21.4857	11.4487
792	2020-07-28 01:30:31	36.7965	28.2244	15.4344			792	2020-08-03 23:12:07	37.0145	21.5101	11.4434
793	2020-07-28 01:31:31	36.7965	28.2244	15.4344			793	2020-08-03 23:13:07	37.0145	21.5589	11.4777
794	2020-07-28 01:32:31	36.7965	28.2244	15.4344			794	2020-08-03 23:14:07	37.0145	21.5833	11.4948
795	2020-07-28 01:33:31	36.7693	28.2488	15.4247			795	2020-08-03 23:15:07	37.0145	21.6566	11.546
796	2020-07-28 01:34:31	36.7693	28.2488	15.4247			796	2020-08-03 23:16:07	37.0418	21.681	11.5856
797	2020-07-28 01:35:31	36.7693	28.2488	15.4247			797	2020-08-03 23:17:07	37.0418	21.7298	11.6197
798	2020-07-28 01:36:31	36.7693	28.2976	15.4517			798	2020-08-03 23:18:07	37.0418	21.7298	11.6197
799	2020-07-28 01:37:31	36.7693	28.322	15.4651			799	2020-08-03 23:19:07	37.0418	21.7298	11.6197
800	2020-07-28 01:38:31	36.7421	28.322	15.442			800	2020-08-03 23:20:07	37.0418	21.7543	11.6367
801	2020-07-28 01:39:31	36.7693	28.322	15.4651			801	2020-08-03 23:21:07	37.0418	21.7543	11.6367
802	2020-07-28 01:40:31	36.7693	28.322	15.4651			802	2020-08-03 23:22:07	37.0418	21.7787	11.6536
803	2020-07-28 01:41:31	36.7693	28.322	15.4651			803	2020-08-03 23:23:07	37.0691	21.7787	11.6762
804	2020-07-28 01:42:31	36.7693	28.3709	15.492			804	2020-08-03 23:24:07	37.0691	21.7787	11.6762
805	2020-07-28 01:43:31	36.7693	28.3709	15.492			805	2020-08-03 23:25:07	37.0691	21.8275	11.7101
806	2020-07-28 01:44:31	36.7693	28.3709	15.492			806	2020-08-03 23:26:07	37.0691	21.8275	11.7101
807	2020-07-28 01:45:31	36.7693	28.3953	15.5055			807	2020-08-03 23:27:07	37.0691	21.8275	11.7101
808	2020-07-28 01:46:31	36.7693	28.4197	15.5189			808	2020-08-03 23:28:07	37.0691	21.8519	11.727
809	2020-07-28 01:47:31	36.7693	28.4197	15.5189			809	2020-08-03 23:29:07	37.0691	21.8519	11.727
810	2020-07-28 01:48:31	36.7693	28.4685	15.5457			810	2020-08-03 23:30:07	37.0691	21.9008	11.7609
811	2020-07-28 01:49:31	36.7693	28.4197	15.5189			811	2020-08-03 23:31:07	37.0691	21.9008	11.7609
812	2020-07-28 01:50:31	36.7693	28.4197	15.5189			812	2020-08-03 23:32:07	37.0691	21.8519	11.727
813	2020-07-28 01:51:31	36.7421	28.4197	15.4957			813	2020-08-03 23:33:07	37.0691	21.8519	11.727
814	2020-07-28 01:52:31	36.7421	28.4685	15.5225			814	2020-08-03 23:34:07	37.0691	21.9008	11.7609
815	2020-07-28 01:53:31	36.7421	28.4685	15.5225			815	2020-08-03 23:35:07	37.0418	21.9008	11.7383
816	2020-07-28 01:54:31	36.7421	28.4685	15.5225			816	2020-08-03 23:36:07	37.0691	21.9008	11.7609
817	2020-07-28 01:55:31	36.7421	28.4685	15.5225			817	2020-08-03 23:37:07	37.0691	21.9252	11.7778
818	2020-07-28 01:56:31	36.7421	28.4685	15.5225			818	2020-08-03 23:38:07	37.0691	21.9252	11.7778
819	2020-07-28 01:57:31	36.7421	28.4685	15.5225			819	2020-08-03 23:39:07	37.0691	21.9252	11.7778
820	2020-07-28 01:58:31	36.7421	28.4197	15.4957			820	2020-08-03 23:40:07	37.0691	21.9252	11.7778
821	2020-07-28 01:59:31	36.7149	28.4685	15.4994			821	2020-08-03 23:41:07	37.0691	21.9252	11.7778
822	2020-07-28 02:00:31	36.7149	28.4685	15.4994			822	2020-08-03 23:42:07	37.0691	21.9252	11.7778
823	2020-07-28 02:01:31	36.7149	28.4197	15.4725			823	2020-08-03 23:43:07	37.0418	21.9496	11.7721
824	2020-07-28 02:02:31	36.7149	28.4197	15.4725			824	2020-08-03 23:44:07	37.0691	21.9496	11.7946
825	2020-07-28 02:03:31	36.7149	28.4197	15.4725			825	2020-08-03 23:45:07	37.0691	21.9496	11.7946
826	2020-07-28 02:04:31	36.6877	28.4197	15.4494			826	2020-08-03 23:46:07	37.0691	21.9496	11.7946
827	2020-07-28 02:05:31	36.6877	28.4197	15.4494			827	2020-08-03 23:47:07	37.0691	21.9496	11.7946
828	2020-07-28 02:06:31	36.6877	28.4197	15.4494			828	2020-08-03 23:48:07	37.0691	21.9496	11.7946
829	2020-07-28 02:07:31	36.7149	28.4197	15.4725			829	2020-08-03 23:49:07	37.0418	21.9496	11.7721
830	2020-07-28 02:08:31	36.6877	28.3953	15.436			830	2020-08-03 23:50:07	37.0418	21.9496	11.7721
831	2020-07-28 02:09:31	36.7149	28.3953	15.4591			831	2020-08-03 23:51:07	37.0418	21.9984	11.8058
832	2020-07-28 02:10:31	36.7149	28.3709	15.4457			832	2020-08-03 23:52:07	37.0418	21.9984	11.8058
833	2020-07-28 02:11:31	36.7149	28.3709	15.4457			833	2020-08-03 23:53:07	37.0418	21.9984	11.8058
834	2020-07-28 02:12:31	36.7149	28.3709	15.4457			834	2020-08-03 23:54:07	37.0418	21.9984	11.8058
835	2020-07-28 02:13:31	36.7149	28.3709	15.4457			835	2020-08-03 23:55:07	37.0418	22.0228	11.8226
836	2020-07-28 02:14:31	36.7149	28.322	15.4188			836	2020-08-03 23:56:07	37.0418	22.0228	11.8226
837	2020-07-28 02:15:31	36.7149	28.322	15.4188			837	2020-08-03 23:57:07	37.0418	21.9984	11.8058
838	2020-07-28 02:16:31	36.6877	28.322	15.3957			838	2020-08-03 23:58:07	37.0418	22.0228	11.8226
839	2020-07-28 02:17:31	36.6877	28.322	15.3957			839	2020-08-03 23:59:07	37.0418	22.0228	11.8226
840	2020-07-28 02:18:31	36.6877	28.2976	15.3822			840	2020-08-04 00:00:07	37.0418	22.0228	11.8226
841	2020-07-28 02:19:31	36.6877	28.2976	15.3822			841	2020-08-04 00:01:07	37.0418	22.0228	11.8226
842	2020-07-28 02:20:31	36.6877	28.2976	15.3822			842	2020-08-04 00:02:07	37.0418	22.0717	11.8562
843	2020-07-28 02:21:31	36.6877	28.2732	15.3687			843	2020-08-04 00:03:07	37.0418	22.0717	11.8562
844	2020-07-28 02:22:31	36.7149	28.2732	15.3919			844	2020-08-04 00:04:07	37.0145	22.0717	11.8337
845	2020-07-28 02:23:31	36.7149	28.2488	15.3784			845	2020-08-04 00:05:07	37.0145	22.0961	11.8504
846	2020-07-28 02:24:31	36.7149	28.2488	15.3784			846	2020-08-04 00:06:07	37.0145	22.0717	11.8337
847	2020-07-28 02:25:31	36.7149	28.2488	15.3784			847	2020-08-04 00:07:07	37.0145	22.0961	11.8504
848	2020-07-28 02:26:31	36.7149	28.2488	15.3784			848	2020-08-04 00:08:07	37.0145	22.1205	11.8672
849	2020-07-28 02:27:31	36.7149	28.2488	15.3784			849	2020-08-04 00:09:07	37.0145	22.0961	11.8504
850	2020-07-28 02:28:31	36.7149	28.2244	15.3649			850	2020-08-04 00:10:07	37.0145	22.1205	11.8672
851	2020-07-28 02:29:31	36.7149	28.2488	15.3784			851	2020-08-04 00:11:07	37.0145	22.1205	11.8672
852	2020-07-28 02:30:31	36.7149	28.2	15.3514			852	2020-08-04 00:12:07	37.0145	22.1693	11.9007
853	2020-07-28 02:31:31	36.6877	28.1755	15.3148			853	2020-08-04 00:13:07	37.0145	22.1693	11.9007
854	2020-07-28 02:32:31	36.6877	28.2244	15.3418			854	2020-08-04 00:14:07	37.0145	22.1205	11.8672
855	2020-07-28 02:33:31	36.6877	28.1755	15.3148			855	2020-08-04 00:15:07	37.0145	22.1693	11.9007
856	2020-07-28 02:34:31	36.6877	28.2	15.3283			856	2020-08-04 00:16:07	37.0145	22.1693	11.9007
857	2020-07-28 02:35:31	36.6877	28.1755	15.3148			857	2020-08-04 00:17:07	37.0145	22.1693	11.9007
858	2020-07-28 02:36:31	36.6877	28.1755	15.3148			858	2020-08-04 00:18:07	37.0418	22.1205	11.8897
859	2020-07-28 02:37:31	36.7149	28.1755	15.3379			859	2020-08-04 00:19:07	37.0418	22.1205	11.8897
860	2020-07-28 02:38:31	36.6877	28.1755	15.3148			860	2020-08-04 00:20:07	37.0418	22.1205	11.8897
861	2020-07-28 02:39:31	36.6877	28.1755	15.3148			861	2020-08-04 00:21:07	37.0418	22.1205	11.8897
862	2020-07-28 02:40:31	36.6877	28.1511	15.3012			862	2020-08-04 00:22:07	37.0418	22.1205	11.8897
863	2020-07-28 02:41:31	36.6877	28.1511	15.3012			863	2020-08-04 00:23:07	37.0145	22.1693	11.9007
864	2020-07-28 02:42:31	36.7149	28.1511	15.3244			864	2020-08-04 00:24:07	37.0418	22.1205	11.8897
865	2020-07-28 02:43:31	36.7149	28.1511	15.3244			865	2020-08-04 00:25:07	37.0145	22.1693	11.9007
866	2020-07-28 02:44:31	36.7149	28.1511	15.3244			866	2020-08-04 00:26:07	37.0145	22.1693	11.9007
867	2020-07-28 02:45:31	36.7149	28.1511	15.3244			867	2020-08-04 00:27:07	37.0145	22.1693	11.9007
868	2020-07-28 02:46:31	36.7149	28.1511	15.3244			868	2020-08-04 00:28:07	37.0145	22.1693	11.9007
869	2020-07-28 02:47:31	36.7149	28.1511	15.3244			869	2020-08-04 00:29:07	37.0418	22.1693	11.9232
870	2020-07-28 02:48:31	36.7149	28.1511	15.3244			870	2020-08-04 00:30:07	37.0418	22.1937	11.9399
871	2020-07-28 02:49:31	36.6877	28.1023	15.2742			871	2020-08-04 00:31:07	37.0418	22.1937	11.9399
872	2020-07-28 02:50:31	36.7149	28.1511	15.3244			872	2020-08-04 00:32:07	37.0418	22.1693	11.9232
873	2020-07-28 02:51:31	36.7149	28.1267	15.3108			873	2020-08-04 00:33:07	37.0418	22.1693	11.9232
874	2020-07-28 02:52:31	36.6877	28.1511	15.3012			874	2020-08-04 00:34:07	37.0418	22.1693	11.9232
875	2020-07-28 02:53:31	36.6877	28.1511	15.3012			875	2020-08-04 00:35:07	37.0418	22.1693	11.9232
876	2020-07-28 02:54:31	36.6877	28.1511	15.3012			876	2020-08-04 00:36:07	37.0418	22.1937	11.9399
877	2020-07-28 02:55:31	36.7149	28.1511	15.3244			877	2020-08-04 00:37:07	37.0418	22.1937	11.9399
878	2020-07-28 02:56:31	36.7149	28.1511	15.3244			878	2020-08-04 00:38:07	37.0418	22.1937	11.9399
879	2020-07-28 02:57:31	36.6877	28.1023	15.2742			879	2020-08-04 00:39:07	37.0418	22.1937	11.9399
880	2020-07-28 02:58:31	36.7149	28.1511	15.3244			880	2020-08-04 00:40:07	37.0418	22.1937	11.9399
881	2020-07-28 02:59:31	36.7149	28.1511	15.3244			881	2020-08-04 00:41:07	37.0418	22.1937	11.9399
882	2020-07-28 03:00:31	36.7149	28.1023	15.2973			882	2020-08-04 00:42:07	37.0418	22.1937	11.9399
883	2020-07-28 03:01:31	36.7149	28.1511	15.3244			883	2020-08-04 00:43:07	37.0418	22.2182	11.9566
884	2020-07-28 03:02:31	36.7149	28.1511	15.3244			884	2020-08-04 00:44:07	37.0418	22.2182	11.9566
885	2020-07-28 03:03:31	36.7149	28.1511	15.3244			885	2020-08-04 00:45:07	37.0418	22.2182	11.9566
886	2020-07-28 03:04:31	36.7149	28.1511	15.3244			886	2020-08-04 00:46:07	37.0418	22.2182	11.9566
887	2020-07-28 03:05:31	36.7149	28.1511	15.3244			887	2020-08-04 00:47:07	37.0145	22.267	11.9674
888	2020-07-28 03:06:31	36.7149	28.1267	15.3108			888	2020-08-04 00:48:07	37.0418	22.267	11.99
889	2020-07-28 03:07:31	36.7149	28.1267	15.3108			889	2020-08-04 00:49:07	37.0418	22.267	11.99
890	2020-07-28 03:08:31	36.7149	28.1267	15.3108			890	2020-08-04 00:50:07	37.0145	22.267	11.9674
891	2020-07-28 03:09:31	36.7149	28.2488	15.3784			891	2020-08-04 00:51:07	37.0145	22.267	11.9674
892	2020-07-28 03:10:31	36.7149	28.2488	15.3784			892	2020-08-04 00:52:07	37.0145	22.267	11.9674
893	2020-07-28 03:11:31	36.6877	28.2488	15.3553			893	2020-08-04 00:53:07	37.0145	22.2914	11.984
894	2020-07-28 03:12:31	36.6877	28.2488	15.3553			894	2020-08-04 00:54:07	37.0145	22.2914	11.984
895	2020-07-28 03:13:31	36.6877	28.2488	15.3553			895	2020-08-04 00:55:07	37.0145	22.3402	12.0173
896	2020-07-28 03:14:31	36.6877	28.2488	15.3553			896	2020-08-04 00:56:07	37.0145	22.3402	12.0173
897	2020-07-28 03:15:31	36.6877	28.2244	15.3418			897	2020-08-04 00:57:07	37.0145	22.3646	12.0338
898	2020-07-28 03:16:31	36.6877	28.2244	15.3418			898	2020-08-04 00:58:07	37.0145	22.3646	12.0338
899	2020-07-28 03:17:31	36.6877	28.2244	15.3418			899	2020-08-04 00:59:07	37.0145	22.3646	12.0338
900	2020-07-28 03:18:31	36.6877	28.2244	15.3418			900	2020-08-04 01:00:07	37.0145	22.3891	12.0504
901	2020-07-28 03:19:31	36.6877	28.2	15.3283			901	2020-08-04 01:01:07	37.0145	22.3646	12.0338
902	2020-07-28 03:20:31	36.6877	28.2244	15.3418			902	2020-08-04 01:02:07	37.0145	22.3646	12.0338
903	2020-07-28 03:21:31	36.6877	28.2244	15.3418			903	2020-08-04 01:03:07	37.0145	22.3891	12.0504
904	2020-07-28 03:22:31	36.6877	28.2244	15.3418			904	2020-08-04 01:04:07	37.0145	22.4379	12.0835
905	2020-07-28 03:23:31	36.6877	28.2244	15.3418			905	2020-08-04 01:05:07	37.0145	22.3891	12.0504
906	2020-07-28 03:24:31	36.6877	28.2488	15.3553			906	2020-08-04 01:06:07	37.0145	22.4379	12.0835
907	2020-07-28 03:25:31	36.6877	28.2244	15.3418			907	2020-08-04 01:07:07	37.0145	22.4379	12.0835
908	2020-07-28 03:26:31	36.6877	28.2488	15.3553			908	2020-08-04 01:08:07	37.0145	22.4379	12.0835
909	2020-07-28 03:27:31	36.6606	28.2488	15.3321			909	2020-08-04 01:09:07	37.0418	22.4379	12.1061
910	2020-07-28 03:28:31	36.6606	28.2488	15.3321			910	2020-08-04 01:10:07	37.0145	22.4379	12.0835
911	2020-07-28 03:29:31	36.6606	28.2488	15.3321			911	2020-08-04 01:11:07	37.0418	22.4623	12.1227
912	2020-07-28 03:30:31	36.6606	28.2488	15.3321			912	2020-08-04 01:12:07	37.0418	22.4623	12.1227
913	2020-07-28 03:31:31	36.6606	28.2488	15.3321			913	2020-08-04 01:13:07	37.0418	22.4623	12.1227
914	2020-07-28 03:32:31	36.6606	28.2976	15.3591			914	2020-08-04 01:14:07	37.0418	22.4623	12.1227
915	2020-07-28 03:33:31	36.6606	28.2488	15.3321			915	2020-08-04 01:15:07	37.0418	22.4623	12.1227
916	2020-07-28 03:34:31	36.6606	28.2488	15.3321			916	2020-08-04 01:16:07	37.0418	22.4623	12.1227
917	2020-07-28 03:35:31	36.6606	28.2976	15.3591			917	2020-08-04 01:17:07	37.0418	22.4623	12.1227
918	2020-07-28 03:36:31	36.6606	28.2732	15.3456			918	2020-08-04 01:18:07	37.0418	22.4623	12.1227
919	2020-07-28 03:37:31	36.6606	28.2488	15.3321			919	2020-08-04 01:19:07	37.0418	22.4623	12.1227
920	2020-07-28 03:38:31	36.6606	28.2732	15.3456			920	2020-08-04 01:20:07	37.0418	22.4623	12.1227
921	2020-07-28 03:39:31	36.6606	28.2488	15.3321			921	2020-08-04 01:21:07	37.0418	22.4623	12.1227
922	2020-07-28 03:40:31	36.6334	28.2732	15.3225			922	2020-08-04 01:22:07	37.0418	22.4623	12.1227
923	2020-07-28 03:41:31	36.6334	28.2732	15.3225			923	2020-08-04 01:23:07	37.0145	22.5111	12.1331
924	2020-07-28 03:42:31	36.6334	28.2732	15.3225			924	2020-08-04 01:24:07	37.0145	22.5111	12.1331
925	2020-07-28 03:43:31	36.6334	28.2732	15.3225			925	2020-08-04 01:25:07	37.0145	22.5111	12.1331
926	2020-07-28 03:44:31	36.6334	28.2976	15.3359			926	2020-08-04 01:26:07	37.0145	22.5111	12.1331
927	2020-07-28 03:45:31	36.6334	28.2976	15.3359			927	2020-08-04 01:27:07	37.0145	22.5356	12.1496
928	2020-07-28 03:46:31	36.6334	28.2976	15.3359			928	2020-08-04 01:28:07	37.0145	22.5356	12.1496
929	2020-07-28 03:47:31	36.6063	28.2976	15.3128			929	2020-08-04 01:29:07	37.0145	22.5356	12.1496
930	2020-07-28 03:48:31	36.6063	28.3465	15.3397			930	2020-08-04 01:30:07	37.0145	22.5356	12.1496
931	2020-07-28 03:49:31	36.6063	28.3465	15.3397			931	2020-08-04 01:31:07	37.0145	22.5356	12.1496
932	2020-07-28 03:50:31	36.6063	28.3709	15.3531			932	2020-08-04 01:32:07	37.0145	22.5356	12.1496
933	2020-07-28 03:51:31	36.6063	28.3709	15.3531			933	2020-08-04 01:33:07	37.0418	22.5356	12.1722
934	2020-07-28 03:52:31	36.6063	28.3709	15.3531			934	2020-08-04 01:34:07	37.0418	22.5356	12.1722
935	2020-07-28 03:53:31	36.6063	28.3709	15.3531			935	2020-08-04 01:35:07	37.0418	22.56	12.1886
936	2020-07-28 03:54:31	36.6063	28.3709	15.3531			936	2020-08-04 01:36:07	37.0418	22.5356	12.1722
937	2020-07-28 03:55:31	36.6063	28.4197	15.38			937	2020-08-04 01:37:07	37.0418	22.56	12.1886
938	2020-07-28 03:56:31	36.6063	28.4197	15.38			938	2020-08-04 01:38:07	37.0418	22.56	12.1886
939	2020-07-28 03:57:31	36.6063	28.4197	15.38			939	2020-08-04 01:39:07	37.0418	22.56	12.1886
940	2020-07-28 03:58:31	36.6063	28.4197	15.38			940	2020-08-04 01:40:07	37.0418	22.56	12.1886
941	2020-07-28 03:59:31	36.6063	28.4197	15.38			941	2020-08-04 01:41:07	37.0145	22.56	12.166
942	2020-07-28 04:00:31	36.6063	28.4197	15.38			942	2020-08-04 01:42:07	37.0145	22.56	12.166
943	2020-07-28 04:01:31	36.6063	28.4197	15.38			943	2020-08-04 01:43:07	37.0145	22.56	12.166
944	2020-07-28 04:02:31	36.6063	28.4441	15.3934			944	2020-08-04 01:44:07	37.0145	22.6088	12.1989
945	2020-07-28 04:03:31	36.6063	28.4197	15.38			945	2020-08-04 01:45:07	37.0418	22.6088	12.2215
946	2020-07-28 04:04:31	36.6063	28.4441	15.3934			946	2020-08-04 01:46:07	37.0418	22.6088	12.2215
947	2020-07-28 04:05:31	36.6063	28.4441	15.3934			947	2020-08-04 01:47:07	37.0145	22.6088	12.1989
948	2020-07-28 04:06:31	36.6063	28.4441	15.3934			948	2020-08-04 01:48:07	37.0145	22.6088	12.1989
949	2020-07-28 04:07:31	36.6063	28.4441	15.3934			949	2020-08-04 01:49:07	37.0418	22.6088	12.2215
950	2020-07-28 04:08:31	36.6063	28.4685	15.4067			950	2020-08-04 01:50:07	37.0418	22.6088	12.2215
951	2020-07-28 04:09:31	36.6063	28.4685	15.4067			951	2020-08-04 01:51:07	37.0418	22.6088	12.2215
952	2020-07-28 04:10:31	36.6063	28.4685	15.4067			952	2020-08-04 01:52:07	37.0418	22.6088	12.2215
953	2020-07-28 04:11:31	36.6063	28.4685	15.4067			953	2020-08-04 01:53:07	37.0145	22.6088	12.1989
954	2020-07-28 04:12:31	36.6334	28.5174	15.4566			954	2020-08-04 01:54:07	37.0145	22.6088	12.1989
955	2020-07-28 04:13:31	36.6334	28.4685	15.4299			955	2020-08-04 01:55:07	37.0145	22.6088	12.1989
956	2020-07-28 04:14:31	36.6334	28.4685	15.4299			956	2020-08-04 01:56:07	37.0145	22.6088	12.1989
957	2020-07-28 04:15:31	36.6334	28.5174	15.4566			957	2020-08-04 01:57:07	37.0145	22.6088	12.1989
958	2020-07-28 04:16:31	36.6334	28.5174	15.4566			958	2020-08-04 01:58:07	37.0145	22.6088	12.1989
959	2020-07-28 04:17:31	36.6334	28.5174	15.4566			959	2020-08-04 01:59:07	37.0145	22.6088	12.1989
960	2020-07-28 04:18:31	36.6334	28.5174	15.4566			960	2020-08-04 02:00:07	37.0145	22.6088	12.1989
961	2020-07-28 04:19:31	36.6063	28.5418	15.4468			961	2020-08-04 02:01:07	37.0145	22.6088	12.1989
962	2020-07-28 04:20:31	36.6063	28.5418	15.4468			962	2020-08-04 02:02:07	37.0145	22.56	12.166
963	2020-07-28 04:21:31	36.6063	28.5906	15.4735			963	2020-08-04 02:03:07	37.0145	22.6088	12.1989
964	2020-07-28 04:22:31	36.6063	28.5906	15.4735			964	2020-08-04 02:04:07	37.0145	22.6088	12.1989
965	2020-07-28 04:23:31	36.6063	28.5906	15.4735			965	2020-08-04 02:05:07	37.0145	22.6088	12.1989
966	2020-07-28 04:24:31	36.6334	28.5906	15.4967			966	2020-08-04 02:06:07	37.0145	22.6088	12.1989
967	2020-07-28 04:25:31	36.6334	28.5906	15.4967			967	2020-08-04 02:07:07	37.0145	22.6332	12.2153
968	2020-07-28 04:26:31	36.6334	28.615	15.51			968	2020-08-04 02:08:07	37.0145	22.6332	12.2153
969	2020-07-28 04:27:31	36.6334	28.5906	15.4967			969	2020-08-04 02:09:07	37.0145	22.6088	12.1989
970	2020-07-28 04:28:31	36.6334	28.615	15.51			970	2020-08-04 02:10:07	37.0145	22.6088	12.1989
971	2020-07-28 04:29:31	36.6334	28.615	15.51			971	2020-08-04 02:11:07	37.0418	22.6088	12.2215
972	2020-07-28 04:30:31	36.6334	28.615	15.51			972	2020-08-04 02:12:07	37.0418	22.6088	12.2215
973	2020-07-28 04:31:31	36.6334	28.615	15.51			973	2020-08-04 02:13:07	37.0418	22.6088	12.2215
974	2020-07-28 04:32:31	36.6334	28.6394	15.5233			974	2020-08-04 02:14:07	37.0418	22.56	12.1886
975	2020-07-28 04:33:31	36.6334	28.615	15.51			975	2020-08-04 02:15:07	37.0418	22.56	12.1886
976	2020-07-28 04:34:31	36.6334	28.6394	15.5233			976	2020-08-04 02:16:07	37.0418	22.56	12.1886
977	2020-07-28 04:35:31	36.6606	28.6394	15.5465			977	2020-08-04 02:17:07	37.0418	22.5356	12.1722
978	2020-07-28 04:36:31	36.6606	28.6394	15.5465			978	2020-08-04 02:18:07	37.0418	22.56	12.1886
979	2020-07-28 04:37:31	36.6606	28.6394	15.5465			979	2020-08-04 02:19:07	37.0418	22.56	12.1886
980	2020-07-28 04:38:31	36.6606	28.6394	15.5465			980	2020-08-04 02:20:07	37.0418	22.5356	12.1722
981	2020-07-28 04:39:31	36.6606	28.6883	15.5731			981	2020-08-04 02:21:07	37.0418	22.56	12.1886
982	2020-07-28 04:40:31	36.6606	28.6883	15.5731			982	2020-08-04 02:22:07	37.0145	22.56	12.166
983	2020-07-28 04:41:31	36.6606	28.6883	15.5731			983	2020-08-04 02:23:07	37.0145	22.56	12.166
984	2020-07-28 04:42:31	36.6606	28.6883	15.5731			984	2020-08-04 02:24:07	37.0145	22.56	12.166
985	2020-07-28 04:43:31	36.6606	28.7127	15.5864			985	2020-08-04 02:25:07	37.0145	22.56	12.166
986	2020-07-28 04:44:31	36.6606	28.7127	15.5864			986	2020-08-04 02:26:07	37.0145	22.5356	12.1496
987	2020-07-28 04:45:31	36.6606	28.7127	15.5864			987	2020-08-04 02:27:07	37.0145	22.5356	12.1496
988	2020-07-28 04:46:31	36.6877	28.7127	15.6096			988	2020-08-04 02:28:07	37.0145	22.5356	12.1496
989	2020-07-28 04:47:31	36.6606	28.7127	15.5864			989	2020-08-04 02:29:07	37.0145	22.56	12.166
990	2020-07-28 04:48:31	36.6606	28.7371	15.5997			990	2020-08-04 02:30:07	37.0418	22.5356	12.1722
991	2020-07-28 04:49:31	36.6606	28.7371	15.5997			991	2020-08-04 02:31:07	37.0418	22.5356	12.1722
992	2020-07-28 04:50:31	36.6606	28.7371	15.5997			992	2020-08-04 02:32:07	37.0418	22.5111	12.1557
993	2020-07-28 04:51:31	36.6606	28.7615	15.613			993	2020-08-04 02:33:07	37.0418	22.5356	12.1722
994	2020-07-28 04:52:31	36.6606	28.7859	15.6262			994	2020-08-04 02:34:07	37.0418	22.5111	12.1557
995	2020-07-28 04:53:31	36.6606	28.8104	15.6395			995	2020-08-04 02:35:07	37.0418	22.5356	12.1722
996	2020-07-28 04:54:31	36.6606	28.8104	15.6395			996	2020-08-04 02:36:07	37.0418	22.5111	12.1557
997	2020-07-28 04:55:31	36.6606	28.8104	15.6395			997	2020-08-04 02:37:07	37.0145	22.5111	12.1331
998	2020-07-28 04:56:31	36.6606	28.8592	15.666			998	2020-08-04 02:38:07	37.0145	22.5111	12.1331
999	2020-07-28 04:57:31	36.6334	28.8104	15.6163			999	2020-08-04 02:39:07	37.0145	22.5111	12.1331
1000	2020-07-28 04:58:31	36.6334	28.8104	15.6163			1000	2020-08-04 02:40:07	37.0145	22.5111	12.1331
1001	2020-07-28 04:59:31	36.6606	28.8592	15.666			1001	2020-08-04 02:41:07	37.0145	22.5111	12.1331
1002	2020-07-28 05:00:31	36.6606	28.8592	15.666			1002	2020-08-04 02:42:07	37.0145	22.5111	12.1331
1003	2020-07-28 05:01:31	36.6606	28.8836	15.6792			1003	2020-08-04 02:43:07	37.0145	22.5111	12.1331
1004	2020-07-28 05:02:31	36.6606	28.8592	15.666			1004	2020-08-04 02:44:07	37.0145	22.5111	12.1331
1005	2020-07-28 05:03:31	36.6606	28.8836	15.6792			1005	2020-08-04 02:45:07	37.0145	22.5111	12.1331
1006	2020-07-28 05:04:31	36.6606	28.8836	15.6792			1006	2020-08-04 02:46:07	37.0145	22.5111	12.1331
1007	2020-07-28 05:05:31	36.6606	28.8836	15.6792			1007	2020-08-04 02:47:07	37.0418	22.5111	12.1557
1008	2020-07-28 05:06:31	36.6606	28.8592	15.666			1008	2020-08-04 02:48:07	37.0418	22.5111	12.1557
1009	2020-07-28 05:07:31	36.6606	28.8836	15.6792			1009	2020-08-04 02:49:07	37.0418	22.5111	12.1557
1010	2020-07-28 05:08:31	36.6606	28.8836	15.6792			1010	2020-08-04 02:50:07	37.0418	22.5111	12.1557
1011	2020-07-28 05:09:31	36.6606	28.908	15.6924			1011	2020-08-04 02:51:07	37.0418	22.5111	12.1557
1012	2020-07-28 05:10:31	36.6606	28.908	15.6924			1012	2020-08-04 02:52:07	37.0145	22.5111	12.1331
1013	2020-07-28 05:11:31	36.6606	28.908	15.6924			1013	2020-08-04 02:53:07	37.0145	22.5111	12.1331
1014	2020-07-28 05:12:31	36.6606	28.9568	15.7188			1014	2020-08-04 02:54:07	37.0145	22.5356	12.1496
1015	2020-07-28 05:13:31	36.6606	28.9568	15.7188			1015	2020-08-04 02:55:07	37.0418	22.5356	12.1722
1016	2020-07-28 05:14:31	36.6606	28.9813	15.732			1016	2020-08-04 02:56:07	37.0145	22.5111	12.1331
1017	2020-07-28 05:15:31	36.6334	28.9813	15.7088			1017	2020-08-04 02:57:07	37.0145	22.5111	12.1331
1018	2020-07-28 05:16:31	36.6334	28.9813	15.7088			1018	2020-08-04 02:58:07	37.0145	22.5356	12.1496
1019	2020-07-28 05:17:31	36.6334	29.0301	15.7351			1019	2020-08-04 02:59:07	37.0145	22.5356	12.1496
1020	2020-07-28 05:18:31	36.6334	29.0301	15.7351			1020	2020-08-04 03:00:07	36.9872	22.5356	12.127
1021	2020-07-28 05:19:31	36.6334	29.0301	15.7351			1021	2020-08-04 03:01:07	37.0145	22.5356	12.1496
1022	2020-07-28 05:20:31	36.6334	29.0545	15.7483			1022	2020-08-04 03:02:07	36.9872	22.5111	12.1105
1023	2020-07-28 05:21:31	36.6334	29.0545	15.7483			1023	2020-08-04 03:03:07	37.0145	22.5356	12.1496
1024	2020-07-28 05:22:31	36.6334	29.0545	15.7483			1024	2020-08-04 03:04:07	37.0145	22.5356	12.1496
1025	2020-07-28 05:23:31	36.6334	29.0789	15.7614			1025	2020-08-04 03:05:07	36.9872	22.5356	12.127
1026	2020-07-28 05:24:31	36.6334	29.0789	15.7614			1026	2020-08-04 03:06:07	36.9872	22.56	12.1434
1027	2020-07-28 05:25:31	36.6334	29.0789	15.7614			1027	2020-08-04 03:07:07	36.9872	22.56	12.1434
1028	2020-07-28 05:26:31	36.6334	29.0789	15.7614			1028	2020-08-04 03:08:07	36.9872	22.56	12.1434
1029	2020-07-28 05:27:31	36.6334	29.1278	15.7877			1029	2020-08-04 03:09:07	36.9872	22.56	12.1434
1030	2020-07-28 05:28:31	36.6334	29.1278	15.7877			1030	2020-08-04 03:10:07	36.9872	22.56	12.1434
1031	2020-07-28 05:29:31	36.6334	29.1522	15.8008			1031	2020-08-04 03:11:07	36.9872	22.5844	12.1599
1032	2020-07-28 05:30:31	36.6334	29.1278	15.7877			1032	2020-08-04 03:12:07	36.9872	22.5844	12.1599
1033	2020-07-28 05:31:31	36.6334	29.1522	15.8008			1033	2020-08-04 03:13:07	36.9872	22.5844	12.1599
1034	2020-07-28 05:32:31	36.6334	29.1522	15.8008			1034	2020-08-04 03:14:07	36.9872	22.5844	12.1599
1035	2020-07-28 05:33:31	36.6063	29.1766	15.7907			1035	2020-08-04 03:15:07	36.9872	22.5844	12.1599
1036	2020-07-28 05:34:31	36.6063	29.1766	15.7907			1036	2020-08-04 03:16:07	36.9872	22.56	12.1434
1037	2020-07-28 05:35:31	36.6063	29.1766	15.7907			1037	2020-08-04 03:17:07	37.0145	22.6088	12.1989
1038	2020-07-28 05:36:31	36.6334	29.2254	15.8401			1038	2020-08-04 03:18:07	36.9872	22.56	12.1434
1039	2020-07-28 05:37:31	36.6063	29.2254	15.8169			1039	2020-08-04 03:19:07	37.0145	22.56	12.166
1040	2020-07-28 05:38:31	36.6063	29.2254	15.8169			1040	2020-08-04 03:20:07	37.0145	22.56	12.166
1041	2020-07-28 05:39:31	36.6063	29.2254	15.8169			1041	2020-08-04 03:21:07	37.0145	22.56	12.166
1042	2020-07-28 05:40:31	36.6063	29.2254	15.8169			1042	2020-08-04 03:22:07	37.0145	22.56	12.166
1043	2020-07-28 05:41:31	36.6063	29.2498	15.83			1043	2020-08-04 03:23:07	37.0145	22.56	12.166
1044	2020-07-28 05:42:31	36.6063	29.2498	15.83			1044	2020-08-04 03:24:07	37.0145	22.5356	12.1496
1045	2020-07-28 05:43:31	36.6063	29.2498	15.83			1045	2020-08-04 03:25:07	37.0145	22.56	12.166
1046	2020-07-28 05:44:31	36.6063	29.2254	15.8169			1046	2020-08-04 03:26:07	37.0145	22.5356	12.1496
1047	2020-07-28 05:45:31	36.6063	29.2498	15.83			1047	2020-08-04 03:27:07	37.0145	22.5356	12.1496
1048	2020-07-28 05:46:31	36.6063	29.2987	15.8561			1048	2020-08-04 03:28:07	37.0145	22.5356	12.1496
1049	2020-07-28 05:47:31	36.6063	29.2987	15.8561			1049	2020-08-04 03:29:07	37.0145	22.5356	12.1496
1050	2020-07-28 05:48:31	36.6063	29.2987	15.8561			1050	2020-08-04 03:30:07	37.0145	22.5111	12.1331
1051	2020-07-28 05:49:31	36.6063	29.2987	15.8561			1051	2020-08-04 03:31:07	37.0145	22.5111	12.1331
1052	2020-07-28 05:50:31	36.6334	29.2987	15.8793			1052	2020-08-04 03:32:07	37.0418	22.5111	12.1557
1053	2020-07-28 05:51:31	36.6334	29.2987	15.8793			1053	2020-08-04 03:33:07	37.0418	22.4623	12.1227
1054	2020-07-28 05:52:31	36.6334	29.2987	15.8793			1054	2020-08-04 03:34:07	37.0418	22.4379	12.1061
1055	2020-07-28 05:53:31	36.6334	29.2987	15.8793			1055	2020-08-04 03:35:07	37.0418	22.4379	12.1061
1056	2020-07-28 05:54:31	36.6334	29.3231	15.8924			1056	2020-08-04 03:36:07	37.0418	22.3891	12.073
1057	2020-07-28 05:55:31	36.6334	29.3231	15.8924			1057	2020-08-04 03:37:07	37.0418	22.4379	12.1061
1058	2020-07-28 05:56:31	36.6334	29.3231	15.8924			1058	2020-08-04 03:38:07	37.0418	22.3646	12.0564
1059	2020-07-28 05:57:31	36.6334	29.3231	15.8924			1059	2020-08-04 03:39:07	37.0418	22.3402	12.0398
1060	2020-07-28 05:58:31	36.6334	29.3231	15.8924			1060	2020-08-04 03:40:07	37.0418	22.3402	12.0398
1061	2020-07-28 05:59:31	36.6334	29.3475	15.9054			1061	2020-08-04 03:41:07	37.0418	22.3402	12.0398
1062	2020-07-28 06:00:31	36.6334	29.3475	15.9054			1062	2020-08-04 03:42:07	37.0418	22.2914	12.0066
1063	2020-07-28 06:01:31	36.6334	29.3963	15.9314			1063	2020-08-04 03:43:07	37.0418	22.2914	12.0066
1064	2020-07-28 06:02:31	36.6334	29.3963	15.9314			1064	2020-08-04 03:44:07	37.0418	22.2914	12.0066
1065	2020-07-28 06:03:31	36.6334	29.3963	15.9314			1065	2020-08-04 03:45:07	37.0418	22.267	11.99
1066	2020-07-28 06:04:31	36.6334	29.4207	15.9445			1066	2020-08-04 03:46:07	37.0418	22.267	11.99
1067	2020-07-28 06:05:31	36.6063	29.4696	15.9472			1067	2020-08-04 03:47:07	37.0418	22.267	11.99
1068	2020-07-28 06:06:31	36.6063	29.4696	15.9472			1068	2020-08-04 03:48:07	37.0418	22.2182	11.9566
1069	2020-07-28 06:07:31	36.6334	29.4696	15.9704			1069	2020-08-04 03:49:07	37.0418	22.2182	11.9566
1070	2020-07-28 06:08:31	36.6334	29.4696	15.9704			1070	2020-08-04 03:50:07	37.0418	22.2182	11.9566
1071	2020-07-28 06:09:31	36.6334	29.494	15.9834			1071	2020-08-04 03:51:07	37.0418	22.2182	11.9566
1072	2020-07-28 06:10:31	36.6334	29.494	15.9834			1072	2020-08-04 03:52:07	37.0418	22.1937	11.9399
1073	2020-07-28 06:11:31	36.6334	29.494	15.9834			1073	2020-08-04 03:53:07	37.0691	22.1937	11.9625
1074	2020-07-28 06:12:31	36.6334	29.494	15.9834			1074	2020-08-04 03:54:07	37.0418	22.1937	11.9399
1075	2020-07-28 06:13:31	36.6334	29.494	15.9834			1075	2020-08-04 03:55:07	37.0418	22.1693	11.9232
1076	2020-07-28 06:14:31	36.6334	29.5184	15.9964			1076	2020-08-04 03:56:07	37.0418	22.1693	11.9232
1077	2020-07-28 06:15:31	36.6334	29.5184	15.9964			1077	2020-08-04 03:57:07	37.0418	22.1693	11.9232
1078	2020-07-28 06:16:31	36.6334	29.5672	16.0223			1078	2020-08-04 03:58:07	37.0418	22.1693	11.9232
1079	2020-07-28 06:17:31	36.6334	29.5672	16.0223			1079	2020-08-04 03:59:07	37.0418	22.1693	11.9232
1080	2020-07-28 06:18:31	36.6334	29.5672	16.0223			1080	2020-08-04 04:00:07	37.0418	22.1693	11.9232
1081	2020-07-28 06:19:31	36.6334	29.5916	16.0353			1081	2020-08-04 04:01:07	37.0418	22.1693	11.9232
1082	2020-07-28 06:20:31	36.6334	29.5916	16.0353			1082	2020-08-04 04:02:07	37.0418	22.1693	11.9232
1083	2020-07-28 06:21:31	36.6063	29.5916	16.012			1083	2020-08-04 04:03:07	37.0418	22.1693	11.9232
1084	2020-07-28 06:22:31	36.6063	29.5916	16.012			1084	2020-08-04 04:04:07	37.0145	22.1693	11.9007
1085	2020-07-28 06:23:31	36.6063	29.6161	16.0249			1085	2020-08-04 04:05:07	37.0145	22.1693	11.9007
1086	2020-07-28 06:24:31	36.6063	29.6649	16.0508			1086	2020-08-04 04:06:07	37.0145	22.1693	11.9007
1087	2020-07-28 06:25:31	36.6063	29.6649	16.0508			1087	2020-08-04 04:07:07	37.0145	22.1693	11.9007
1088	2020-07-28 06:26:31	36.6063	29.6649	16.0508			1088	2020-08-04 04:08:07	37.0145	22.1693	11.9007
1089	2020-07-28 06:27:31	36.6063	29.6649	16.0508			1089	2020-08-04 04:09:07	37.0145	22.1205	11.8672
1090	2020-07-28 06:28:31	36.6063	29.6893	16.0637			1090	2020-08-04 04:10:07	37.0145	22.1693	11.9007
1091	2020-07-28 06:29:31	36.6063	29.6893	16.0637			1091	2020-08-04 04:11:07	37.0145	22.1693	11.9007
1092	2020-07-28 06:30:31	36.6063	29.7381	16.0895			1092	2020-08-04 04:12:07	37.0145	22.1205	11.8672
1093	2020-07-28 06:31:31	36.6063	29.7381	16.0895			1093	2020-08-04 04:13:07	37.0145	22.1205	11.8672
1094	2020-07-28 06:32:31	36.6063	29.7626	16.1024			1094	2020-08-04 04:14:07	37.0145	22.1205	11.8672
1095	2020-07-28 06:33:31	36.6063	29.7381	16.0895			1095	2020-08-04 04:15:07	37.0145	22.1205	11.8672
1096	2020-07-28 06:34:31	36.6063	29.7626	16.1024			1096	2020-08-04 04:16:07	37.0145	22.1205	11.8672
1097	2020-07-28 06:35:31	36.6063	29.7626	16.1024			1097	2020-08-04 04:17:07	37.0145	22.0961	11.8504
1098	2020-07-28 06:36:31	36.6063	29.787	16.1152			1098	2020-08-04 04:18:07	37.0145	22.0961	11.8504
1099	2020-07-28 06:37:31	36.6063	29.787	16.1152			1099	2020-08-04 04:19:07	37.0145	22.0961	11.8504
1100	2020-07-28 06:38:31	36.6063	29.787	16.1152			1100	2020-08-04 04:20:07	37.0418	22.0961	11.873
1101	2020-07-28 06:39:31	36.6063	29.787	16.1152			1101	2020-08-04 04:21:07	37.0418	22.0961	11.873
1102	2020-07-28 06:40:31	36.6063	29.787	16.1152			1102	2020-08-04 04:22:07	37.0418	22.0961	11.873
1103	2020-07-28 06:41:31	36.6063	29.787	16.1152			1103	2020-08-04 04:23:07	37.0418	22.0717	11.8562
1104	2020-07-28 06:42:31	36.6063	29.787	16.1152			1104	2020-08-04 04:24:07	37.0418	22.0717	11.8562
1105	2020-07-28 06:43:31	36.6334	29.8358	16.1642			1105	2020-08-04 04:25:07	37.0418	22.0228	11.8226
1106	2020-07-28 06:44:31	36.6063	29.8358	16.1409			1106	2020-08-04 04:26:07	37.0418	22.0717	11.8562
1107	2020-07-28 06:45:31	36.6334	29.8358	16.1642			1107	2020-08-04 04:27:07	37.0418	22.0228	11.8226
1108	2020-07-28 06:46:31	36.6334	29.8602	16.177			1108	2020-08-04 04:28:07	37.0418	22.0228	11.8226
1109	2020-07-28 06:47:31	36.6063	29.8602	16.1538			1109	2020-08-04 04:29:07	37.0418	22.0228	11.8226
1110	2020-07-28 06:48:31	36.6334	29.8602	16.177			1110	2020-08-04 04:30:07	37.0418	21.9984	11.8058
1111	2020-07-28 06:49:31	36.6334	29.9091	16.2027			1111	2020-08-04 04:31:07	37.0418	21.9984	11.8058
1112	2020-07-28 06:50:31	36.6334	29.9091	16.2027			1112	2020-08-04 04:32:07	37.0418	21.9496	11.7721
1113	2020-07-28 06:51:31	36.6334	29.9091	16.2027			1113	2020-08-04 04:33:07	37.0418	21.9984	11.8058
1114	2020-07-28 06:52:31	36.6334	29.9335	16.2155			1114	2020-08-04 04:34:07	37.0418	21.9496	11.7721
1115	2020-07-28 06:53:31	36.6334	29.9091	16.2027			1115	2020-08-04 04:35:07	37.0418	21.9496	11.7721
1116	2020-07-28 06:54:31	36.6063	29.9335	16.1922			1116	2020-08-04 04:36:07	37.0418	21.9252	11.7552
1117	2020-07-28 06:55:31	36.6063	29.9335	16.1922			1117	2020-08-04 04:37:07	37.0418	21.9252	11.7552
1118	2020-07-28 06:56:31	36.6063	29.9579	16.205			1118	2020-08-04 04:38:07	37.0418	21.9008	11.7383
1119	2020-07-28 06:57:31	36.6063	29.9579	16.205			1119	2020-08-04 04:39:07	37.0418	21.9008	11.7383
1120	2020-07-28 06:58:31	36.6063	30.0067	16.2306			1120	2020-08-04 04:40:07	37.0418	21.9008	11.7383
1121	2020-07-28 06:59:31	36.6063	29.9579	16.205			1121	2020-08-04 04:41:07	37.0418	21.8519	11.7045
1122	2020-07-28 07:00:31	36.6063	30.0067	16.2306			1122	2020-08-04 04:42:07	37.0418	21.8519	11.7045
1123	2020-07-28 07:01:31	36.6063	30.0067	16.2306			1123	2020-08-04 04:43:07	37.0418	21.8275	11.6876
1124	2020-07-28 07:02:31	36.6063	30.0067	16.2306			1124	2020-08-04 04:44:07	37.0418	21.8275	11.6876
1125	2020-07-28 07:03:31	36.6063	30.0311	16.2434			1125	2020-08-04 04:45:07	37.0418	21.8275	11.6876
1126	2020-07-28 07:04:31	36.6334	30.0311	16.2667			1126	2020-08-04 04:46:07	37.0418	21.8275	11.6876
1127	2020-07-28 07:05:31	36.6334	30.0311	16.2667			1127	2020-08-04 04:47:07	37.0418	21.7787	11.6536
1128	2020-07-28 07:06:31	36.6063	30.0311	16.2434			1128	2020-08-04 04:48:07	37.0418	21.7787	11.6536
1129	2020-07-28 07:07:31	36.6063	30.0311	16.2434			1129	2020-08-04 04:49:07	37.0418	21.7543	11.6367
1130	2020-07-28 07:08:31	36.6063	30.0555	16.2562			1130	2020-08-04 04:50:07	37.0418	21.7543	11.6367
1131	2020-07-28 07:09:31	36.6063	30.1044	16.2817			1131	2020-08-04 04:51:07	37.0418	21.7298	11.6197
1132	2020-07-28 07:10:31	36.6063	30.1044	16.2817			1132	2020-08-04 04:52:07	37.0145	21.7298	11.5971
1133	2020-07-28 07:11:31	36.6063	30.1288	16.2944			1133	2020-08-04 04:53:07	37.0145	21.7298	11.5971
1134	2020-07-28 07:12:31	36.6063	30.1288	16.2944			1134	2020-08-04 04:54:07	37.0145	21.7298	11.5971
1135	2020-07-28 07:13:31	36.6063	30.1776	16.3199			1135	2020-08-04 04:55:07	37.0145	21.7298	11.5971
1136	2020-07-28 07:14:31	36.6063	30.202	16.3326			1136	2020-08-04 04:56:07	37.0145	21.7298	11.5971
1137	2020-07-28 07:15:31	36.6063	30.2265	16.3453			1137	2020-08-04 04:57:07	37.0145	21.7298	11.5971
1138	2020-07-28 07:16:31	36.6063	30.2265	16.3453			1138	2020-08-04 04:58:07	37.0145	21.681	11.5631
1139	2020-07-28 07:17:31	36.6063	30.2753	16.3707			1139	2020-08-04 04:59:07	37.0145	21.681	11.5631
1140	2020-07-28 07:18:31	36.6063	30.2753	16.3707			1140	2020-08-04 05:00:07	37.0145	21.681	11.5631
1141	2020-07-28 07:19:31	36.6063	30.2753	16.3707			1141	2020-08-04 05:01:07	37.0145	21.681	11.5631
1142	2020-07-28 07:20:31	36.6063	30.2997	16.3833			1142	2020-08-04 05:02:07	37.0145	21.6566	11.546
1143	2020-07-28 07:21:31	36.6063	30.3485	16.4087			1143	2020-08-04 05:03:07	37.0145	21.681	11.5631
1144	2020-07-28 07:22:31	36.6063	30.3485	16.4087			1144	2020-08-04 05:04:07	37.0145	21.6322	11.529
1145	2020-07-28 07:23:31	36.6063	30.3729	16.4213			1145	2020-08-04 05:05:07	37.0145	21.6566	11.546
1146	2020-07-28 07:24:31	36.6063	30.3729	16.4213			1146	2020-08-04 05:06:07	37.0145	21.6566	11.546
1147	2020-07-28 07:25:31	36.6063	30.3974	16.434			1147	2020-08-04 05:07:07	37.0145	21.6566	11.546
1148	2020-07-28 07:26:31	36.6063	30.4462	16.4592			1148	2020-08-04 05:08:07	37.0145	21.6322	11.529
1149	2020-07-28 07:27:31	36.6063	30.4462	16.4592			1149	2020-08-04 05:09:07	37.0145	21.6322	11.529
1150	2020-07-28 07:28:31	36.6063	30.4462	16.4592			1150	2020-08-04 05:10:07	37.0145	21.5833	11.4948
1151	2020-07-28 07:29:31	36.6063	30.4462	16.4592			1151	2020-08-04 05:11:07	37.0145	21.5833	11.4948
1152	2020-07-28 07:30:31	36.6063	30.4462	16.4592			1152	2020-08-04 05:12:07	37.0418	21.6322	11.5515
1153	2020-07-28 07:31:31	36.6063	30.4218	16.4466			1153	2020-08-04 05:13:07	37.0145	21.6322	11.529
1154	2020-07-28 07:32:31	36.6063	30.3974	16.434			1154	2020-08-04 05:14:07	37.0145	21.5833	11.4948
1155	2020-07-28 07:33:31	36.6063	30.3729	16.4213			1155	2020-08-04 05:15:07	37.0145	21.5833	11.4948
1156	2020-07-28 07:34:31	36.6063	30.3729	16.4213			1156	2020-08-04 05:16:07	37.0145	21.5833	11.4948
1157	2020-07-28 07:35:31	36.6063	30.3485	16.4087			1157	2020-08-04 05:17:07	37.0145	21.5833	11.4948
1158	2020-07-28 07:36:31	36.5791	30.2997	16.36			1158	2020-08-04 05:18:07	37.0145	21.5833	11.4948
1159	2020-07-28 07:37:31	36.6063	30.2753	16.3707			1159	2020-08-04 05:19:07	37.0145	21.5589	11.4777
1160	2020-07-28 07:38:31	36.6063	30.202	16.3326			1160	2020-08-04 05:20:07	37.0145	21.5589	11.4777
1161	2020-07-28 07:39:31	36.6063	30.202	16.3326			1161	2020-08-04 05:21:07	37.0145	21.5589	11.4777
1162	2020-07-28 07:40:31	36.6063	30.1288	16.2944			1162	2020-08-04 05:22:07	37.0145	21.5589	11.4777
1163	2020-07-28 07:41:31	36.6063	30.1288	16.2944			1163	2020-08-04 05:23:07	37.0145	21.5589	11.4777
1164	2020-07-28 07:42:31	36.6063	30.1044	16.2817			1164	2020-08-04 05:24:07	37.0145	21.5101	11.4434
1165	2020-07-28 07:43:31	36.6063	30.0555	16.2562			1165	2020-08-04 05:25:07	37.0145	21.5101	11.4434
1166	2020-07-28 07:44:31	36.6063	30.0067	16.2306			1166	2020-08-04 05:26:07	37.0145	21.5101	11.4434
1167	2020-07-28 07:45:31	36.6063	29.9579	16.205			1167	2020-08-04 05:27:07	37.0145	21.5101	11.4434
1168	2020-07-28 07:46:31	36.6063	29.9335	16.1922			1168	2020-08-04 05:28:07	37.0145	21.5101	11.4434
1169	2020-07-28 07:47:31	36.6063	29.9335	16.1922			1169	2020-08-04 05:29:07	37.0145	21.4857	11.4262
1170	2020-07-28 07:48:31	36.6063	29.8602	16.1538			1170	2020-08-04 05:30:07	37.0145	21.4613	11.409
1171	2020-07-28 07:49:31	36.6063	29.8602	16.1538			1171	2020-08-04 05:31:07	37.0145	21.4857	11.4262
1172	2020-07-28 07:50:31	36.6063	29.8358	16.1409			1172	2020-08-04 05:32:07	37.0145	21.4613	11.409
1173	2020-07-28 07:51:31	36.6063	29.787	16.1152			1173	2020-08-04 05:33:07	37.0145	21.4613	11.409
1174	2020-07-28 07:52:31	36.6063	29.787	16.1152			1174	2020-08-04 05:34:07	37.0145	21.4613	11.409
1175	2020-07-28 07:53:31	36.6063	29.787	16.1152			1175	2020-08-04 05:35:07	37.0145	21.4369	11.3918
1176	2020-07-28 07:54:31	36.6334	29.7626	16.1256			1176	2020-08-04 05:36:07	37.0145	21.4613	11.409
1177	2020-07-28 07:55:31	36.6334	29.7626	16.1256			1177	2020-08-04 05:37:07	37.0145	21.4613	11.409
1178	2020-07-28 07:56:31	36.6334	29.7381	16.1127			1178	2020-08-04 05:38:07	37.0145	21.4124	11.3746
1179	2020-07-28 07:57:31	36.6334	29.7381	16.1127			1179	2020-08-04 05:39:07	37.0145	21.4124	11.3746
1180	2020-07-28 07:58:31	36.6334	29.6893	16.087			1180	2020-08-04 05:40:07	37.0145	21.388	11.3573
1181	2020-07-28 07:59:31	36.6334	29.6649	16.074			1181	2020-08-04 05:41:07	37.0145	21.388	11.3573
1182	2020-07-28 08:00:31	36.6334	29.6649	16.074			1182	2020-08-04 05:42:07	37.0145	21.388	11.3573
1183	2020-07-28 08:01:31	36.6334	29.6161	16.0482			1183	2020-08-04 05:43:07	37.0145	21.3392	11.3228
1184	2020-07-28 08:02:31	36.6334	29.6161	16.0482			1184	2020-08-04 05:44:07	37.0145	21.3392	11.3228
1185	2020-07-28 08:03:31	36.6334	29.6161	16.0482			1185	2020-08-04 05:45:07	37.0145	21.3392	11.3228
1186	2020-07-28 08:04:31	36.6334	29.5916	16.0353			1186	2020-08-04 05:46:07	37.0145	21.3148	11.3055
1187	2020-07-28 08:05:31	36.6334	29.5916	16.0353			1187	2020-08-04 05:47:07	37.0145	21.3392	11.3228
1188	2020-07-28 08:06:31	36.6334	29.5916	16.0353			1188	2020-08-04 05:48:07	37.0418	21.3392	11.3453
1189	2020-07-28 08:07:31	36.6334	29.5916	16.0353			1189	2020-08-04 05:49:07	37.0418	21.2904	11.3107
1190	2020-07-28 08:08:31	36.6334	29.5916	16.0353			1190	2020-08-04 05:50:07	37.0145	21.2904	11.2882
1191	2020-07-28 08:09:31	36.6334	29.5916	16.0353			1191	2020-08-04 05:51:07	37.0145	21.2904	11.2882
1192	2020-07-28 08:10:31	36.6334	29.5916	16.0353			1192	2020-08-04 05:52:07	37.0418	21.2904	11.3107
1193	2020-07-28 08:11:31	36.6334	29.5916	16.0353			1193	2020-08-04 05:53:07	37.0418	21.2904	11.3107
1194	2020-07-28 08:12:31	36.6334	29.5916	16.0353			1194	2020-08-04 05:54:07	37.0418	21.2904	11.3107
1195	2020-07-28 08:13:31	36.6334	29.6161	16.0482			1195	2020-08-04 05:55:07	37.0418	21.2904	11.3107
1196	2020-07-28 08:14:31	36.6334	29.6161	16.0482			1196	2020-08-04 05:56:07	37.0418	21.2904	11.3107
1197	2020-07-28 08:15:31	36.6063	29.6649	16.0508			1197	2020-08-04 05:57:07	37.0418	21.2904	11.3107
1198	2020-07-28 08:16:31	36.6063	29.6649	16.0508			1198	2020-08-04 05:58:07	37.0418	21.2904	11.3107
1199	2020-07-28 08:17:31	36.6063	29.6649	16.0508			1199	2020-08-04 05:59:07	37.0145	21.2904	11.2882
1200	2020-07-28 08:18:31	36.6063	29.6649	16.0508			1200	2020-08-04 06:00:07	37.0145	21.2904	11.2882
1201	2020-07-28 08:19:31	36.6063	29.6893	16.0637			1201	2020-08-04 06:01:07	37.0145	21.2904	11.2882
1202	2020-07-28 08:20:31	36.6063	29.6893	16.0637			1202	2020-08-04 06:02:07	37.0145	21.3148	11.3055
1203	2020-07-28 08:21:31	36.6063	29.6893	16.0637			1203	2020-08-04 06:03:07	37.0145	21.3392	11.3228
1204	2020-07-28 08:22:31	36.6063	29.7381	16.0895			1204	2020-08-04 06:04:07	37.0145	21.3392	11.3228
1205	2020-07-28 08:23:31	36.6063	29.7626	16.1024			1205	2020-08-04 06:05:07	37.0145	21.3392	11.3228
1206	2020-07-28 08:24:31	36.6063	29.7626	16.1024			1206	2020-08-04 06:06:07	37.0145	21.3392	11.3228
1207	2020-07-28 08:25:31	36.6063	29.787	16.1152			1207	2020-08-04 06:07:07	37.0145	21.3392	11.3228
1208	2020-07-28 08:26:31	36.6063	29.7626	16.1024			1208	2020-08-04 06:08:07	37.0145	21.3392	11.3228
1209	2020-07-28 08:27:31	36.6063	29.787	16.1152			1209	2020-08-04 06:09:07	37.0145	21.388	11.3573
1210	2020-07-28 08:28:31	36.6063	29.787	16.1152			1210	2020-08-04 06:10:07	37.0145	21.388	11.3573
1211	2020-07-28 08:29:31	36.6063	29.8358	16.1409			1211	2020-08-04 06:11:07	37.0145	21.388	11.3573
1212	2020-07-28 08:30:31	36.6063	29.8358	16.1409			1212	2020-08-04 06:12:07	37.0145	21.4124	11.3746
1213	2020-07-28 08:31:31	36.6063	29.8358	16.1409			1213	2020-08-04 06:13:07	37.0145	21.388	11.3573
1214	2020-07-28 08:32:31	36.6063	29.8358	16.1409			1214	2020-08-04 06:14:07	37.0418	21.388	11.3798
1215	2020-07-28 08:33:31	36.6063	29.8114	16.1281			1215	2020-08-04 06:15:07	37.0418	21.3392	11.3453
1216	2020-07-28 08:34:31	36.6063	29.8358	16.1409			1216	2020-08-04 06:16:07	37.0418	21.3392	11.3453
1217	2020-07-28 08:35:31	36.6063	29.8602	16.1538			1217	2020-08-04 06:17:07	37.0145	21.3392	11.3228
1218	2020-07-28 08:36:31	36.6063	29.8358	16.1409			1218	2020-08-04 06:18:07	37.0418	21.388	11.3798
1219	2020-07-28 08:37:31	36.6063	29.8358	16.1409			1219	2020-08-04 06:19:07	37.0145	21.388	11.3573
1220	2020-07-28 08:38:31	36.6063	29.8602	16.1538			1220	2020-08-04 06:20:07	37.0418	21.388	11.3798
1221	2020-07-28 08:39:31	36.6063	29.9091	16.1794			1221	2020-08-04 06:21:07	37.0418	21.388	11.3798
1222	2020-07-28 08:40:31	36.6063	29.9091	16.1794			1222	2020-08-04 06:22:07	37.0418	21.388	11.3798
1223	2020-07-28 08:41:31	36.6063	29.9091	16.1794			1223	2020-08-04 06:23:07	37.0418	21.388	11.3798
1224	2020-07-28 08:42:31	36.6063	29.9091	16.1794			1224	2020-08-04 06:24:07	37.0418	21.388	11.3798
1225	2020-07-28 08:43:31	36.6063	29.8602	16.1538			1225	2020-08-04 06:25:07	37.0418	21.388	11.3798
1226	2020-07-28 08:44:31	36.6063	29.9091	16.1794			1226	2020-08-04 06:26:07	37.0418	21.388	11.3798
1227	2020-07-28 08:45:31	36.6063	29.9091	16.1794			1227	2020-08-04 06:27:07	37.0418	21.388	11.3798
1228	2020-07-28 08:46:31	36.6063	29.9091	16.1794			1228	2020-08-04 06:28:07	37.0418	21.388	11.3798
1229	2020-07-28 08:47:31	36.6063	29.9091	16.1794			1229	2020-08-04 06:29:07	37.0418	21.4124	11.397
1230	2020-07-28 08:48:31	36.6063	29.9091	16.1794			1230	2020-08-04 06:30:07	37.0418	21.4124	11.397
1231	2020-07-28 08:49:31	36.6063	29.9335	16.1922			1231	2020-08-04 06:31:07	37.0418	21.4124	11.397
1232	2020-07-28 08:50:31	36.6063	29.9579	16.205			1232	2020-08-04 06:32:07	37.0418	21.4613	11.4315
1233	2020-07-28 08:51:31	36.6063	29.9579	16.205			1233	2020-08-04 06:33:07	37.0418	21.4613	11.4315
1234	2020-07-28 08:52:31	36.6063	29.9579	16.205			1234	2020-08-04 06:34:07	37.0418	21.4857	11.4487
1235	2020-07-28 08:53:31	36.6063	30.0067	16.2306			1235	2020-08-04 06:35:07	37.0418	21.4857	11.4487
1236	2020-07-28 08:54:31	36.5791	30.0311	16.2201			1236	2020-08-04 06:36:07	37.0418	21.5101	11.4658
1237	2020-07-28 08:55:31	36.6063	30.0555	16.2562			1237	2020-08-04 06:37:07	37.0418	21.5101	11.4658
1238	2020-07-28 08:56:31	36.6063	30.1044	16.2817			1238	2020-08-04 06:38:07	37.0418	21.5101	11.4658
1239	2020-07-28 08:57:31	36.6063	30.1288	16.2944			1239	2020-08-04 06:39:07	37.0418	21.5101	11.4658
1240	2020-07-28 08:58:31	36.6063	30.1044	16.2817			1240	2020-08-04 06:40:07	37.0418	21.5589	11.5001
1241	2020-07-28 08:59:31	36.6063	30.1288	16.2944			1241	2020-08-04 06:41:07	37.0418	21.5589	11.5001
1242	2020-07-28 09:00:31	36.6063	30.202	16.3326			1242	2020-08-04 06:42:07	37.0418	21.5589	11.5001
1243	2020-07-28 09:01:31	36.6063	30.2265	16.3453			1243	2020-08-04 06:43:07	37.0418	21.5833	11.5173
1244	2020-07-28 09:02:31	36.6063	30.2753	16.3707			1244	2020-08-04 06:44:07	37.0418	21.5833	11.5173
1245	2020-07-28 09:03:31	36.6063	30.2997	16.3833			1245	2020-08-04 06:45:07	37.0418	21.6322	11.5515
1246	2020-07-28 09:04:31	36.6063	30.3485	16.4087			1246	2020-08-04 06:46:07	37.0418	21.5833	11.5173
1247	2020-07-28 09:05:31	36.6063	30.3729	16.4213			1247	2020-08-04 06:47:07	37.0691	21.6322	11.574
1248	2020-07-28 09:06:31	36.6063	30.3974	16.434			1248	2020-08-04 06:48:07	37.0691	21.6322	11.574
1249	2020-07-28 09:07:31	36.6063	30.4462	16.4592			1249	2020-08-04 06:49:07	37.0691	21.6566	11.591
1250	2020-07-28 09:08:31	36.6063	30.4706	16.4718			1250	2020-08-04 06:50:07	37.0691	21.6322	11.574
1251	2020-07-28 09:09:31	36.6063	30.495	16.4844			1251	2020-08-04 06:51:07	37.0691	21.6566	11.591
1252	2020-07-28 09:10:31	36.6063	30.5439	16.5096			1252	2020-08-04 06:52:07	37.0691	21.681	11.6081
1253	2020-07-28 09:11:31	36.6063	30.5439	16.5096			1253	2020-08-04 06:53:07	37.0691	21.7298	11.6422
1254	2020-07-28 09:12:31	36.6063	30.5439	16.5096			1254	2020-08-04 06:54:07	37.0691	21.7298	11.6422
1255	2020-07-28 09:13:31	36.6063	30.5439	16.5096			1255	2020-08-04 06:55:07	37.0691	21.7298	11.6422
1256	2020-07-28 09:14:31	36.6063	30.5683	16.5222			1256	2020-08-04 06:56:07	37.0691	21.7543	11.6592
1257	2020-07-28 09:15:31	36.6063	30.5683	16.5222			1257	2020-08-04 06:57:07	37.0691	21.7787	11.6762
1258	2020-07-28 09:16:31	36.6063	30.6171	16.5473			1258	2020-08-04 06:58:07	37.0418	21.8275	11.6876
1259	2020-07-28 09:17:31	36.6063	30.6171	16.5473			1259	2020-08-04 06:59:07	37.0691	21.8275	11.7101
1260	2020-07-28 09:18:31	36.6063	30.6415	16.5599			1260	2020-08-04 07:00:07	37.0418	21.8519	11.7045
1261	2020-07-28 09:19:31	36.6063	30.6415	16.5599			1261	2020-08-04 07:01:07	37.0691	21.9252	11.7778
1262	2020-07-28 09:20:31	36.6063	30.6659	16.5724			1262	2020-08-04 07:02:07	37.0691	21.9252	11.7778
1263	2020-07-28 09:21:31	36.6063	30.6659	16.5724			1263	2020-08-04 07:03:07	37.0418	21.9496	11.7721
1264	2020-07-28 09:22:31	36.6063	30.7392	16.61			1264	2020-08-04 07:04:07	37.0418	21.9984	11.8058
1265	2020-07-28 09:23:31	36.6063	30.7392	16.61			1265	2020-08-04 07:05:07	37.0418	21.9984	11.8058
1266	2020-07-28 09:24:31	36.6063	30.788	16.635			1266	2020-08-04 07:06:07	37.0418	22.0228	11.8226
1267	2020-07-28 09:25:31	36.6063	30.788	16.635			1267	2020-08-04 07:07:07	37.0418	22.0717	11.8562
1268	2020-07-28 09:26:31	36.6063	30.8124	16.6475			1268	2020-08-04 07:08:07	37.0418	22.0717	11.8562
1269	2020-07-28 09:27:31	36.6063	30.8124	16.6475			1269	2020-08-04 07:09:07	37.0418	22.0961	11.873
1270	2020-07-28 09:28:31	36.6063	30.8368	16.66			1270	2020-08-04 07:10:07	37.0418	22.1205	11.8897
1271	2020-07-28 09:29:31	36.6063	30.8368	16.66			1271	2020-08-04 07:11:07	37.0418	22.1693	11.9232
1272	2020-07-28 09:30:31	36.6063	30.8857	16.6849			1272	2020-08-04 07:12:07	37.0418	22.1937	11.9399
1273	2020-07-28 09:31:31	36.6063	30.8857	16.6849			1273	2020-08-04 07:13:07	37.0418	22.1937	11.9399
1274	2020-07-28 09:32:31	36.6063	30.9101	16.6974			1274	2020-08-04 07:14:07	37.0418	22.267	11.99
1275	2020-07-28 09:33:31	36.6063	30.9101	16.6974			1275	2020-08-04 07:15:07	37.0145	22.267	11.9674
1276	2020-07-28 09:34:31	36.6063	30.9101	16.6974			1276	2020-08-04 07:16:07	37.0145	22.2914	11.984
1277	2020-07-28 09:35:31	36.6063	30.9101	16.6974			1277	2020-08-04 07:17:07	37.0145	22.3402	12.0173
1278	2020-07-28 09:36:31	36.6063	30.9101	16.6974			1278	2020-08-04 07:18:07	37.0145	22.3646	12.0338
1279	2020-07-28 09:37:31	36.6063	30.9345	16.7098			1279	2020-08-04 07:19:07	37.0145	22.3891	12.0504
1280	2020-07-28 09:38:31	36.6063	30.9345	16.7098			1280	2020-08-04 07:20:07	37.0145	22.3891	12.0504
1281	2020-07-28 09:39:31	36.6063	30.9345	16.7098			1281	2020-08-04 07:21:07	36.9872	22.4379	12.0609
1282	2020-07-28 09:40:31	36.6063	30.9345	16.7098			1282	2020-08-04 07:22:07	36.9872	22.4623	12.0775
1283	2020-07-28 09:41:31	36.6063	30.9101	16.6974			1283	2020-08-04 07:23:07	37.0145	22.4867	12.1166
1284	2020-07-28 09:42:31	36.6063	30.9101	16.6974			1284	2020-08-04 07:24:07	37.0145	22.5356	12.1496
1285	2020-07-28 09:43:31	36.6063	30.9101	16.6974			1285	2020-08-04 07:25:07	36.9872	22.5356	12.127
1286	2020-07-28 09:44:31	36.6063	30.8857	16.6849			1286	2020-08-04 07:26:07	37.0145	22.56	12.166
1287	2020-07-28 09:45:31	36.6063	30.8857	16.6849			1287	2020-08-04 07:27:07	36.9872	22.6088	12.1763
1288	2020-07-28 09:46:31	36.6063	30.8368	16.66			1288	2020-08-04 07:28:07	36.9872	22.6088	12.1763
1289	2020-07-28 09:47:31	36.6063	30.8124	16.6475			1289	2020-08-04 07:29:07	36.9872	22.6576	12.2091
1290	2020-07-28 09:48:31	36.6063	30.788	16.635			1290	2020-08-04 07:30:07	37.0145	22.6576	12.2317
1291	2020-07-28 09:49:31	36.6063	30.788	16.635			1291	2020-08-04 07:31:07	37.0145	22.682	12.2481
1292	2020-07-28 09:50:31	36.6063	30.788	16.635			1292	2020-08-04 07:32:07	37.0145	22.7309	12.2809
1293	2020-07-28 09:51:31	36.6063	30.7392	16.61			1293	2020-08-04 07:33:07	37.0145	22.7309	12.2809
1294	2020-07-28 09:52:31	36.6063	30.7392	16.61			1294	2020-08-04 07:34:07	37.0145	22.7797	12.3135
1295	2020-07-28 09:53:31	36.5791	30.7392	16.5866			1295	2020-08-04 07:35:07	37.0145	22.7797	12.3135
1296	2020-07-28 09:54:31	36.5791	30.7392	16.5866			1296	2020-08-04 07:36:07	37.0145	22.7797	12.3135
1297	2020-07-28 09:55:31	36.5791	30.6903	16.5616			1297	2020-08-04 07:37:07	37.0145	22.8041	12.3298
1298	2020-07-28 09:56:31	36.5791	30.7148	16.5741			1298	2020-08-04 07:38:07	37.0145	22.8041	12.3298
1299	2020-07-28 09:57:31	36.6063	30.6903	16.585			1299	2020-08-04 07:39:07	37.0145	22.8041	12.3298
1300	2020-07-28 09:58:31	36.6063	30.6659	16.5724			1300	2020-08-04 07:40:07	37.0418	22.8285	12.3688
1301	2020-07-28 09:59:31	36.6063	30.6659	16.5724			1301	2020-08-04 07:41:07	37.0418	22.8285	12.3688
1302	2020-07-28 10:00:31	36.6063	30.6659	16.5724			1302	2020-08-04 07:42:07	37.0145	22.8285	12.3461
1303	2020-07-28 10:01:31	36.6063	30.6415	16.5599			1303	2020-08-04 07:43:07	37.0418	22.8774	12.4013
1304	2020-07-28 10:02:31	36.6063	30.6171	16.5473			1304	2020-08-04 07:44:07	37.0145	22.8774	12.3787
1305	2020-07-28 10:03:31	36.6063	30.5683	16.5222			1305	2020-08-04 07:45:07	37.0418	22.8774	12.4013
1306	2020-07-28 10:04:31	36.6063	30.495	16.4844			1306	2020-08-04 07:46:07	37.0418	22.9018	12.4176
1307	2020-07-28 10:05:31	36.6063	30.495	16.4844			1307	2020-08-04 07:47:07	37.0145	22.9262	12.4112
1308	2020-07-28 10:06:31	36.6063	30.4462	16.4592			1308	2020-08-04 07:48:07	37.0145	22.9262	12.4112
1309	2020-07-28 10:07:31	36.6063	30.3974	16.434			1309	2020-08-04 07:49:07	37.0145	22.9262	12.4112
1310	2020-07-28 10:08:31	36.6063	30.3974	16.434			1310	2020-08-04 07:50:07	37.0145	22.975	12.4436
1311	2020-07-28 10:09:31	36.5791	30.3485	16.3853			1311	2020-08-04 07:51:07	37.0145	22.9995	12.4598
1312	2020-07-28 10:10:31	36.5791	30.3241	16.3727			1312	2020-08-04 07:52:07	37.0145	22.9995	12.4598
1313	2020-07-28 10:11:31	36.5791	30.2509	16.3347			1313	2020-08-04 07:53:07	36.9872	23.0483	12.4695
1314	2020-07-28 10:12:31	36.5791	30.2265	16.322			1314	2020-08-04 07:54:07	36.9872	23.0727	12.4856
1315	2020-07-28 10:13:31	36.5791	30.1532	16.2838			1315	2020-08-04 07:55:07	36.9872	23.0971	12.5017
1316	2020-07-28 10:14:31	36.5791	30.1288	16.2711			1316	2020-08-04 07:56:07	37.0145	23.0971	12.5244
1317	2020-07-28 10:15:31	36.6063	30.1044	16.2817			1317	2020-08-04 07:57:07	37.0145	23.0971	12.5244
1318	2020-07-28 10:16:31	36.5791	30.0555	16.2329			1318	2020-08-04 07:58:07	37.0145	23.1459	12.5566
1319	2020-07-28 10:17:31	36.6063	30.0555	16.2562			1319	2020-08-04 07:59:07	37.0145	23.1459	12.5566
1320	2020-07-28 10:18:31	36.5791	30.0067	16.2073			1320	2020-08-04 08:00:07	37.0145	23.1459	12.5566
1321	2020-07-28 10:19:31	36.5791	29.9823	16.1946			1321	2020-08-04 08:01:07	37.0145	23.1704	12.5727
1322	2020-07-28 10:20:31	36.5791	29.9579	16.1818			1322	2020-08-04 08:02:07	37.0145	23.2192	12.6048
1323	2020-07-28 10:21:31	36.5791	29.9579	16.1818			1323	2020-08-04 08:03:07	37.0418	23.2436	12.6436
1324	2020-07-28 10:22:31	36.5791	29.9579	16.1818			1324	2020-08-04 08:04:07	37.0418	23.2436	12.6436
1325	2020-07-28 10:23:31	36.5791	29.8846	16.1433			1325	2020-08-04 08:05:07	37.0418	23.268	12.6596
1326	2020-07-28 10:24:31	36.5791	29.9091	16.1561			1326	2020-08-04 08:06:07	37.0418	23.268	12.6596
1327	2020-07-28 10:25:31	36.5791	29.8846	16.1433			1327	2020-08-04 08:07:07	37.0418	23.3169	12.6916
1328	2020-07-28 10:26:31	36.5791	29.8358	16.1177			1328	2020-08-04 08:08:07	37.0145	23.3169	12.6689
1329	2020-07-28 10:27:31	36.552	29.8358	16.0944			1329	2020-08-04 08:09:07	37.0145	23.3169	12.6689
1330	2020-07-28 10:28:31	36.552	29.8114	16.0816			1330	2020-08-04 08:10:07	37.0145	23.3413	12.6849
1331	2020-07-28 10:29:31	36.552	29.8114	16.0816			1331	2020-08-04 08:11:07	37.0145	23.3413	12.6849
1332	2020-07-28 10:30:31	36.552	29.8114	16.0816			1332	2020-08-04 08:12:07	37.0145	23.3413	12.6849
1333	2020-07-28 10:31:31	36.552	29.8114	16.0816			1333	2020-08-04 08:13:07	37.0145	23.3413	12.6849
1334	2020-07-28 10:32:31	36.552	29.8114	16.0816			1334	2020-08-04 08:14:07	37.0145	23.3413	12.6849
1335	2020-07-28 10:33:31	36.552	29.787	16.0687			1335	2020-08-04 08:15:07	37.0145	23.3169	12.6689
1336	2020-07-28 10:34:31	36.5791	29.787	16.092			1336	2020-08-04 08:16:07	37.0145	23.3169	12.6689
1337	2020-07-28 10:35:31	36.5791	29.787	16.092			1337	2020-08-04 08:17:07	37.0145	23.3169	12.6689
1338	2020-07-28 10:36:31	36.5791	29.787	16.092			1338	2020-08-04 08:18:07	37.0145	23.3169	12.6689
1339	2020-07-28 10:37:31	36.5791	29.787	16.092			1339	2020-08-04 08:19:07	37.0145	23.268	12.6369
1340	2020-07-28 10:38:31	36.5791	29.8114	16.1048			1340	2020-08-04 08:20:07	37.0145	23.268	12.6369
1341	2020-07-28 10:39:31	36.5791	29.787	16.092			1341	2020-08-04 08:21:07	37.0145	23.268	12.6369
1342	2020-07-28 10:40:31	36.5791	29.787	16.092			1342	2020-08-04 08:22:07	37.0145	23.2436	12.6209
1343	2020-07-28 10:41:31	36.5791	29.8114	16.1048			1343	2020-08-04 08:23:07	37.0145	23.2192	12.6048
1344	2020-07-28 10:42:31	36.5791	29.8114	16.1048			1344	2020-08-04 08:24:07	37.0145	23.2192	12.6048
1345	2020-07-28 10:43:31	36.5791	29.8114	16.1048			1345	2020-08-04 08:25:07	37.0145	23.1704	12.5727
1346	2020-07-28 10:44:31	36.5791	29.8114	16.1048			1346	2020-08-04 08:26:07	37.0145	23.1704	12.5727
1347	2020-07-28 10:45:31	36.5791	29.8114	16.1048			1347	2020-08-04 08:27:07	37.0145	23.1459	12.5566
1348	2020-07-28 10:46:31	36.5791	29.8114	16.1048			1348	2020-08-04 08:28:07	37.0145	23.1459	12.5566
1349	2020-07-28 10:47:31	36.5791	29.8114	16.1048			1349	2020-08-04 08:29:07	37.0145	23.1459	12.5566
1350	2020-07-28 10:48:31	36.5791	29.8114	16.1048			1350	2020-08-04 08:30:07	37.0145	23.0971	12.5244
1351	2020-07-28 10:49:31	36.5791	29.8114	16.1048			1351	2020-08-04 08:31:07	37.0145	23.0971	12.5244
1352	2020-07-28 10:50:31	36.5791	29.8114	16.1048			1352	2020-08-04 08:32:07	37.0145	23.0971	12.5244
1353	2020-07-28 10:51:31	36.5791	29.8114	16.1048			1353	2020-08-04 08:33:07	37.0145	23.0727	12.5083
1354	2020-07-28 10:52:31	36.5791	29.8114	16.1048			1354	2020-08-04 08:34:07	37.0145	23.0483	12.4921
1355	2020-07-28 10:53:31	36.5791	29.8114	16.1048			1355	2020-08-04 08:35:07	37.0145	23.0483	12.4921
1356	2020-07-28 10:54:31	36.5791	29.8114	16.1048			1356	2020-08-04 08:36:07	37.0145	22.9995	12.4598
1357	2020-07-28 10:55:31	36.5791	29.8114	16.1048			1357	2020-08-04 08:37:07	37.0145	22.975	12.4436
1358	2020-07-28 10:56:31	36.5791	29.8114	16.1048			1358	2020-08-04 08:38:07	37.0145	22.9262	12.4112
1359	2020-07-28 10:57:31	36.5791	29.8114	16.1048			1359	2020-08-04 08:39:07	37.0145	22.9262	12.4112
1360	2020-07-28 10:58:31	36.5791	29.8114	16.1048			1360	2020-08-04 08:40:07	37.0418	22.9018	12.4176
1361	2020-07-28 10:59:31	36.5791	29.8114	16.1048			1361	2020-08-04 08:41:07	37.0418	22.8774	12.4013
1362	2020-07-28 11:00:31	36.5791	29.787	16.092			1362	2020-08-04 08:42:07	37.0418	22.8285	12.3688
1363	2020-07-28 11:01:31	36.5791	29.8114	16.1048			1363	2020-08-04 08:43:07	37.0418	22.8041	12.3525
1364	2020-07-28 11:02:31	36.5791	29.8114	16.1048			1364	2020-08-04 08:44:07	37.0145	22.7797	12.3135
1365	2020-07-28 11:03:31	36.5791	29.8114	16.1048			1365	2020-08-04 08:45:07	37.0145	22.7309	12.2809
1366	2020-07-28 11:04:31	36.5791	29.8114	16.1048			1366	2020-08-04 08:46:07	37.0145	22.7065	12.2645
1367	2020-07-28 11:05:31	36.5791	29.8358	16.1177			1367	2020-08-04 08:47:07	37.0145	22.6576	12.2317
1368	2020-07-28 11:06:31	36.5791	29.8358	16.1177			1368	2020-08-04 08:48:07	37.0145	22.6332	12.2153
1369	2020-07-28 11:07:31	36.5791	29.8358	16.1177			1369	2020-08-04 08:49:07	37.0145	22.56	12.166
1370	2020-07-28 11:08:31	36.6063	29.8358	16.1409			1370	2020-08-04 08:50:07	37.0145	22.5356	12.1496
1371	2020-07-28 11:09:31	36.6063	29.8358	16.1409			1371	2020-08-04 08:51:07	37.0145	22.5111	12.1331
1372	2020-07-28 11:10:31	36.6063	29.8114	16.1281			1372	2020-08-04 08:52:07	37.0145	22.4623	12.1001
1373	2020-07-28 11:11:31	36.6063	29.8358	16.1409			1373	2020-08-04 08:53:07	37.0145	22.4379	12.0835
1374	2020-07-28 11:12:31	36.6063	29.787	16.1152			1374	2020-08-04 08:54:07	37.0145	22.3891	12.0504
1375	2020-07-28 11:13:31	36.6063	29.8358	16.1409			1375	2020-08-04 08:55:07	37.0145	22.3646	12.0338
1376	2020-07-28 11:14:31	36.6334	29.787	16.1385			1376	2020-08-04 08:56:07	37.0145	22.3402	12.0173
1377	2020-07-28 11:15:31	36.6334	29.787	16.1385			1377	2020-08-04 08:57:07	37.0145	22.2914	11.984
1378	2020-07-28 11:16:31	36.6334	29.7626	16.1256			1378	2020-08-04 08:58:07	37.0145	22.2914	11.984
1379	2020-07-28 11:17:31	36.6334	29.7626	16.1256			1379	2020-08-04 08:59:07	37.0145	22.2914	11.984
1380	2020-07-28 11:18:31	36.6334	29.7381	16.1127			1380	2020-08-04 09:00:07	37.0145	22.267	11.9674
1381	2020-07-28 11:19:31	36.6334	29.6893	16.087			1381	2020-08-04 09:01:07	37.0145	22.267	11.9674
1382	2020-07-28 11:20:31	36.6334	29.6649	16.074			1382	2020-08-04 09:02:07	37.0145	22.2182	11.934
1383	2020-07-28 11:21:31	36.6334	29.6649	16.074			1383	2020-08-04 09:03:07	37.0145	22.2182	11.934
1384	2020-07-28 11:22:31	36.6334	29.6161	16.0482			1384	2020-08-04 09:04:07	37.0145	22.1937	11.9174
1385	2020-07-28 11:23:31	36.6334	29.6161	16.0482			1385	2020-08-04 09:05:07	37.0145	22.1205	11.8672
1386	2020-07-28 11:24:31	36.6334	29.6161	16.0482			1386	2020-08-04 09:06:07	37.0145	22.0961	11.8504
1387	2020-07-28 11:25:31	36.6334	29.6161	16.0482			1387	2020-08-04 09:07:07	37.0418	22.0228	11.8226
1388	2020-07-28 11:26:31	36.6334	29.6161	16.0482			1388	2020-08-04 09:08:07	37.0418	21.9496	11.7721
1389	2020-07-28 11:27:31	36.6063	29.6161	16.0249			1389	2020-08-04 09:09:07	37.0418	21.8519	11.7045
1390	2020-07-28 11:28:31	36.6063	29.6649	16.0508			1390	2020-08-04 09:10:07	37.0418	21.7543	11.6367
1391	2020-07-28 11:29:31	36.6063	29.6649	16.0508			1391	2020-08-04 09:11:07	37.0418	21.681	11.5856
1392	2020-07-28 11:30:31	36.6063	29.6161	16.0249			1392	2020-08-04 09:12:07	37.0418	21.6322	11.5515
1393	2020-07-28 11:31:31	36.6334	29.6161	16.0482			1393	2020-08-04 09:13:07	37.0418	21.5589	11.5001
1394	2020-07-28 11:32:31	36.6334	29.6161	16.0482			1394	2020-08-04 09:14:07	37.0145	21.4857	11.4262
1395	2020-07-28 11:33:31	36.6334	29.5916	16.0353			1395	2020-08-04 09:15:07	37.0145	21.4124	11.3746
1396	2020-07-28 11:34:31	36.6334	29.5916	16.0353			1396	2020-08-04 09:16:07	37.0145	21.3392	11.3228
1397	2020-07-28 11:35:31	36.6334	29.5916	16.0353			1397	2020-08-04 09:17:07	37.0145	21.2904	11.2882
1398	2020-07-28 11:36:31	36.6063	29.5916	16.012			1398	2020-08-04 09:18:07	37.0145	21.2171	11.2362
1399	2020-07-28 11:37:31	36.6063	29.6161	16.0249			1399	2020-08-04 09:19:07	37.0145	21.1927	11.2188
1400	2020-07-28 11:38:31	36.6334	29.6161	16.0482			1400	2020-08-04 09:20:07	37.0145	21.1439	11.184
1401	2020-07-28 11:39:31	36.6334	29.6161	16.0482			1401	2020-08-04 09:21:07	37.0145	21.1195	11.1665
1402	2020-07-28 11:40:31	36.6334	29.6161	16.0482			1402	2020-08-04 09:22:07	37.0145	21.0706	11.1316
1403	2020-07-28 11:41:31	36.6334	29.6649	16.074			1403	2020-08-04 09:23:07	37.0418	21.0462	11.1366
1404	2020-07-28 11:42:31	36.6334	29.5916	16.0353			1404	2020-08-04 09:24:07	37.0145	21.0218	11.0966
1405	2020-07-28 11:43:31	36.6334	29.5916	16.0353			1405	2020-08-04 09:25:07	37.0145	20.973	11.0616
1406	2020-07-28 11:44:31	36.4436	29.0057	15.5598			1406	2020-08-04 09:26:07	37.0145	20.8997	11.0088
1407	2020-07-28 11:45:31	36.552	28.9568	15.6261			1407	2020-08-04 09:27:07	37.0145	20.8997	11.0088
1408	2020-07-28 11:46:31	36.7149	28.8348	15.6991			1408	2020-08-04 09:28:07	37.0145	20.8509	10.9736
1409	2020-07-28 11:47:31	36.8509	28.615	15.6956			1409	2020-08-04 09:29:07	37.0145	20.8021	10.9383
1410	2020-07-28 11:48:31	36.8782	28.4685	15.6385			1410	2020-08-04 09:30:07	37.0145	20.8021	10.9383
1411	2020-07-28 11:49:31	36.9054	28.3465	15.5946			1411	2020-08-04 09:31:07	37.0145	20.8021	10.9383
1412	2020-07-28 11:50:31	36.9054	28.2488	15.5406			1412	2020-08-04 09:32:07	37.0145	20.8021	10.9383
1413	2020-07-28 11:51:31	36.8509	28.1755	15.4537			1413	2020-08-04 09:33:07	37.0145	20.7532	10.9029
1414	2020-07-28 11:52:31	36.8237	28.1755	15.4305			1414	2020-08-04 09:34:07	37.0145	20.7532	10.9029
1415	2020-07-28 11:53:31	36.7965	28.1755	15.4073			1415	2020-08-04 09:35:07	37.0145	20.7044	10.8674
1416	2020-07-28 11:54:31	36.7693	28.1511	15.3707			1416	2020-08-04 09:36:07	37.0145	20.7044	10.8674
1417	2020-07-28 11:55:31	36.7421	28.2	15.3746			1417	2020-08-04 09:37:07	37.0145	20.68	10.8497
1418	2020-07-28 11:56:31	36.7421	28.2244	15.3881			1418	2020-08-04 09:38:07	37.0145	20.7044	10.8674
1419	2020-07-28 11:57:31	36.7149	28.2244	15.3649			1419	2020-08-04 09:39:07	37.0145	20.7044	10.8674
1420	2020-07-28 11:58:31	36.6063	28.3465	15.3397			1420	2020-08-04 09:40:07	37.0145	20.7532	10.9029
1421	2020-07-28 11:59:31	36.4165	28.908	15.484			1421	2020-08-04 09:41:07	37.0145	20.8021	10.9383
1422	2020-07-28 12:00:31	36.4436	29.1522	15.6385			1422	2020-08-04 09:42:07	36.9872	20.8753	10.9688
1423	2020-07-28 12:01:31	36.5249	29.2987	15.7865			1423	2020-08-04 09:43:07	37.0145	20.9485	11.044
1424	2020-07-28 12:02:31	36.552	29.3475	15.8357			1424	2020-08-04 09:44:07	36.9872	21.0218	11.0742
1425	2020-07-28 12:03:31	36.5791	29.4207	15.898			1425	2020-08-04 09:45:07	36.9872	21.0218	11.0742
1426	2020-07-28 12:04:31	36.5791	29.4696	15.924			1426	2020-08-04 09:46:07	36.9872	21.0706	11.1092
1427	2020-07-28 12:05:31	36.5791	29.5428	15.9629			1427	2020-08-04 09:47:07	36.9872	21.0706	11.1092
1428	2020-07-28 12:06:31	36.5791	29.6161	16.0017			1428	2020-08-04 09:48:07	36.9872	21.095	11.1267
1429	2020-07-28 12:07:31	36.552	29.6893	16.0172			1429	2020-08-04 09:49:07	36.9872	21.095	11.1267
1430	2020-07-28 12:08:31	36.552	29.7137	16.0301			1430	2020-08-04 09:50:07	36.9872	21.095	11.1267
1431	2020-07-28 12:09:31	36.552	29.7626	16.0558			1431	2020-08-04 09:51:07	36.9872	21.095	11.1267
1432	2020-07-28 12:10:31	36.552	29.787	16.0687			1432	2020-08-04 09:52:07	36.9872	21.095	11.1267
1433	2020-07-28 12:11:31	36.552	29.8602	16.1072			1433	2020-08-04 09:53:07	36.9872	21.095	11.1267
1434	2020-07-28 12:12:31	36.552	29.9091	16.1329			1434	2020-08-04 09:54:07	36.9872	21.1195	11.1441
1435	2020-07-28 12:13:31	36.552	29.9335	16.1457			1435	2020-08-04 09:55:07	36.9872	21.1195	11.1441
1436	2020-07-28 12:14:31	36.552	29.9579	16.1585			1436	2020-08-04 09:56:07	36.96	21.1683	11.1565
1437	2020-07-28 12:15:31	36.552	30.0067	16.1841			1437	2020-08-04 09:57:07	36.96	21.1683	11.1565
1438	2020-07-28 12:16:31	36.552	30.0067	16.1841			1438	2020-08-04 09:58:07	36.96	21.1927	11.1739
1439	2020-07-28 12:17:31	36.552	30.0311	16.1968			1439	2020-08-04 09:59:07	36.96	21.2415	11.2087
1440	2020-07-28 12:18:31	36.5791	30.0555	16.2329			1440	2020-08-04 10:00:07	36.96	21.2659	11.226
1441	2020-07-28 12:19:31	36.5791	30.1288	16.2711			1441	2020-08-04 10:01:07	36.96	21.2659	11.226
1442	2020-07-28 12:20:31	36.5791	30.1532	16.2838			1442	2020-08-04 10:02:07	36.96	21.2659	11.226
1443	2020-07-28 12:21:31	36.5791	30.1776	16.2966			1443	2020-08-04 10:03:07	36.96	21.3392	11.2779
1444	2020-07-28 12:22:31	36.5791	30.2265	16.322			1444	2020-08-04 10:04:07	36.96	21.3392	11.2779
1445	2020-07-28 12:23:31	36.5791	30.2509	16.3347			1445	2020-08-04 10:05:07	36.96	21.2659	11.226
1446	2020-07-28 12:24:31	36.6063	30.2753	16.3707			1446	2020-08-04 10:06:07	36.96	21.2415	11.2087
1447	2020-07-28 12:25:31	36.6063	30.3241	16.396			1447	2020-08-04 10:07:07	36.9872	21.1927	11.1963
1448	2020-07-28 12:26:31	36.6063	30.4218	16.4466			1448	2020-08-04 10:08:07	36.9872	21.1683	11.179
1449	2020-07-28 12:27:31	36.6063	30.4462	16.4592			1449	2020-08-04 10:09:07	36.9872	21.1195	11.1441
1450	2020-07-28 12:28:31	36.6063	30.495	16.4844			1450	2020-08-04 10:10:07	36.9872	21.095	11.1267
1451	2020-07-28 12:29:31	36.6063	30.495	16.4844			1451	2020-08-04 10:11:07	36.9872	21.0706	11.1092
1452	2020-07-28 12:30:31	36.6063	30.495	16.4844			1452	2020-08-04 10:12:07	36.9872	21.0218	11.0742
1453	2020-07-28 12:31:31	36.6063	30.495	16.4844			1453	2020-08-04 10:13:07	36.9872	20.973	11.0392
1454	2020-07-28 12:32:31	36.6063	30.4462	16.4592			1454	2020-08-04 10:14:07	36.96	20.9241	10.9816
1455	2020-07-28 12:33:31	36.6063	30.4462	16.4592			1455	2020-08-04 10:15:07	36.96	20.9241	10.9816
1456	2020-07-28 12:34:31	36.6063	30.4218	16.4466			1456	2020-08-04 10:16:07	36.96	20.8997	10.9641
1457	2020-07-28 12:35:31	36.6063	30.3974	16.434			1457	2020-08-04 10:17:07	36.96	20.8997	10.9641
1458	2020-07-28 12:36:31	36.6334	30.3485	16.432			1458	2020-08-04 10:18:07	36.96	20.8997	10.9641
1459	2020-07-28 12:37:31	36.6334	30.3241	16.4193			1459	2020-08-04 10:19:07	36.96	20.8509	10.9288
1460	2020-07-28 12:38:31	36.6334	30.2753	16.394			1460	2020-08-04 10:20:07	36.9327	20.8997	10.9417
1461	2020-07-28 12:39:31	36.6334	30.2509	16.3813			1461	2020-08-04 10:21:07	36.9327	20.8997	10.9417
1462	2020-07-28 12:40:31	36.6334	30.1776	16.3432			1462	2020-08-04 10:22:07	36.9327	20.9241	10.9593
1463	2020-07-28 12:41:31	36.6334	30.1776	16.3432			1463	2020-08-04 10:23:07	36.96	20.9241	10.9816
1464	2020-07-28 12:42:31	36.6063	30.1776	16.3199			1464	2020-08-04 10:24:07	36.96	20.973	11.0168
1465	2020-07-28 12:43:31	36.6334	30.1532	16.3304			1465	2020-08-04 10:25:07	36.96	20.973	11.0168
1466	2020-07-28 12:44:31	36.6334	30.1288	16.3177			1466	2020-08-04 10:26:07	36.96	20.973	11.0168
1467	2020-07-28 12:45:31	36.6334	30.1288	16.3177			1467	2020-08-04 10:27:07	36.96	20.973	11.0168
1468	2020-07-28 12:46:31	36.6063	30.08	16.2689			1468	2020-08-04 10:28:07	36.96	20.973	11.0168
1469	2020-07-28 12:47:31	36.6063	30.0555	16.2562			1469	2020-08-04 10:29:07	36.96	20.973	11.0168
1470	2020-07-28 12:48:31	36.6063	30.0067	16.2306			1470	2020-08-04 10:30:07	36.96	20.9974	11.0343
1471	2020-07-28 12:49:31	36.6334	29.9823	16.2411			1471	2020-08-04 10:31:07	36.96	20.9974	11.0343
1472	2020-07-28 12:50:31	36.6334	29.9091	16.2027			1472	2020-08-04 10:32:07	36.96	20.9974	11.0343
1473	2020-07-28 12:51:31	36.6063	29.9091	16.1794			1473	2020-08-04 10:33:07	36.96	21.0218	11.0518
1474	2020-07-28 12:52:31	36.6063	29.8846	16.1666			1474	2020-08-04 10:34:07	36.9872	20.9974	11.0567
1475	2020-07-28 12:53:31	36.6063	29.8358	16.1409			1475	2020-08-04 10:35:07	36.9872	20.9974	11.0567
1476	2020-07-28 12:54:31	36.6063	29.8358	16.1409			1476	2020-08-04 10:36:07	36.9872	20.9974	11.0567
1477	2020-07-28 12:55:31	36.6063	29.8114	16.1281			1477	2020-08-04 10:37:07	36.9872	20.9974	11.0567
1478	2020-07-28 12:56:31	36.6063	29.8114	16.1281			1478	2020-08-04 10:38:07	36.9872	20.9974	11.0567
1479	2020-07-28 12:57:31	36.6063	29.787	16.1152			1479	2020-08-04 10:39:07	36.9872	21.0218	11.0742
1480	2020-07-28 12:58:31	36.6063	29.7381	16.0895			1480	2020-08-04 10:40:07	36.9872	21.0218	11.0742
1481	2020-07-28 12:59:31	36.6063	29.7381	16.0895			1481	2020-08-04 10:41:07	36.9872	21.0706	11.1092
1482	2020-07-28 13:00:31	36.6063	29.7137	16.0766			1482	2020-08-04 10:42:07	37.0145	21.0706	11.1316
1483	2020-07-28 13:01:31	36.6063	29.6893	16.0637			1483	2020-08-04 10:43:07	37.0145	21.1195	11.1665
1484	2020-07-28 13:02:31	36.6063	29.6893	16.0637			1484	2020-08-04 10:44:07	37.0145	21.1195	11.1665
1485	2020-07-28 13:03:31	36.6063	29.6893	16.0637			1485	2020-08-04 10:45:07	37.0145	21.1195	11.1665
1486	2020-07-28 13:04:31	36.6063	29.6405	16.0379			1486	2020-08-04 10:46:07	37.0145	21.0706	11.1316
1487	2020-07-28 13:05:31	36.6063	29.6405	16.0379			1487	2020-08-04 10:47:07	37.0145	21.0462	11.1141
1488	2020-07-28 13:06:31	36.6063	29.6161	16.0249			1488	2020-08-04 10:48:07	37.0145	21.0218	11.0966
1489	2020-07-28 13:07:31	36.6063	29.5672	15.9991			1489	2020-08-04 10:49:07	37.0145	20.973	11.0616
1490	2020-07-28 13:08:31	36.6063	29.5672	15.9991			1490	2020-08-04 10:50:07	37.0145	20.9485	11.044
1491	2020-07-28 13:09:31	36.6334	29.5428	16.0094			1491	2020-08-04 10:51:07	37.0418	20.8997	11.0312
1492	2020-07-28 13:10:31	36.6063	29.5428	15.9861			1492	2020-08-04 10:52:07	36.8782	20.2405	10.4154
1493	2020-07-28 13:11:31	36.6334	29.5428	16.0094			1493	2020-08-04 10:53:07	36.8782	20.094	10.3065
1494	2020-07-28 13:12:31	36.6063	29.5184	15.9732			1494	2020-08-04 10:54:07	36.96	20.0208	10.3186
1495	2020-07-28 13:13:31	36.6063	29.4696	15.9472			1495	2020-08-04 10:55:07	36.9872	19.8743	10.2308
1496	2020-07-28 13:14:31	36.6334	29.4452	15.9575			1496	2020-08-04 10:56:07	37.0145	19.801	10.1978
1497	2020-07-28 13:15:31	36.6063	29.3719	15.8952			1497	2020-08-04 10:57:07	37.0145	19.7278	10.1423
1498	2020-07-28 13:16:31	36.6063	29.3475	15.8822			1498	2020-08-04 10:58:07	36.9872	19.7034	10.1015
1499	2020-07-28 13:17:31	36.6063	29.2498	15.83			1499	2020-08-04 10:59:07	36.96	19.6545	10.0422
1500	2020-07-28 13:18:31	36.6334	29.1766	15.8139			1500	2020-08-04 11:00:07	36.9327	19.6545	10.02
1501	2020-07-28 13:19:31	36.6063	29.0789	15.7382			1501	2020-08-04 11:01:07	36.9327	19.6545	10.02
1502	2020-07-28 13:20:31	36.6334	29.0057	15.722			1502	2020-08-04 11:02:07	36.9327	19.6057	9.98282
1503	2020-07-28 13:21:31	36.6334	28.9324	15.6824			1503	2020-08-04 11:03:07	36.9054	19.5324	9.90471
1504	2020-07-28 13:22:31	36.6063	28.8592	15.6196			1504	2020-08-04 11:04:07	36.9054	19.508	9.88603
1505	2020-07-28 13:23:31	36.6063	28.8348	15.6064			1505	2020-08-04 11:05:07	36.5249	19.801	9.79852
1506	2020-07-28 13:24:31	36.6063	28.7371	15.5534			1506	2020-08-04 11:06:07	36.4165	20.1428	9.96562
1507	2020-07-28 13:25:31	36.6334	28.6883	15.55			1507	2020-08-04 11:07:07	36.4707	20.3626	10.1722
1508	2020-07-28 13:26:31	36.6334	28.6639	15.5367			1508	2020-08-04 11:08:07	36.5791	20.4602	10.3326
1509	2020-07-28 13:27:31	36.6334	28.6394	15.5233			1509	2020-08-04 11:09:07	36.6606	20.5091	10.435
1510	2020-07-28 13:28:31	36.6334	28.5662	15.4833			1510	2020-08-04 11:10:07	36.6877	20.5091	10.4573
1511	2020-07-28 13:29:31	36.6063	28.5174	15.4335			1511	2020-08-04 11:11:07	36.7421	20.5091	10.5018
1512	2020-07-28 13:30:31	36.6063	28.493	15.4201			1512	2020-08-04 11:12:07	36.7693	20.5335	10.5419
1513	2020-07-28 13:31:31	36.6063	28.4197	15.38			1513	2020-08-04 11:13:07	36.7693	20.5335	10.5419
1514	2020-07-28 13:32:31	36.6063	28.3953	15.3665			1514	2020-08-04 11:14:07	36.7965	20.4846	10.5284
1515	2020-07-28 13:33:31	36.6063	28.3709	15.3531			1515	2020-08-04 11:15:07	36.7965	20.4602	10.5105
1516	2020-07-28 13:34:31	36.6063	28.322	15.3263			1516	2020-08-04 11:16:07	36.7965	20.4114	10.4747
1517	2020-07-28 13:35:31	36.6063	28.2976	15.3128			1517	2020-08-04 11:17:07	36.8237	20.387	10.479
1518	2020-07-28 13:36:31	36.6063	28.2488	15.2859			1518	2020-08-04 11:18:07	36.8237	20.387	10.479
1519	2020-07-28 13:37:31	36.6063	28.2	15.2589			1519	2020-08-04 11:19:07	36.8237	20.3626	10.461
1520	2020-07-28 13:38:31	36.6334	28.1267	15.2415			1520	2020-08-04 11:20:07	36.8509	20.3382	10.4653
1521	2020-07-28 13:39:31	36.6334	28.1023	15.2279			1521	2020-08-04 11:21:07	36.8509	20.3137	10.4473
1522	2020-07-28 13:40:31	36.6334	27.9802	15.1601			1522	2020-08-04 11:22:07	36.8509	20.2649	10.4112
1523	2020-07-28 13:41:31	36.6334	27.9314	15.1329			1523	2020-08-04 11:23:07	36.8509	20.2405	10.3931
1524	2020-07-28 13:42:31	36.6063	27.8581	15.069			1524	2020-08-04 11:24:07	36.8782	20.2405	10.4154
1525	2020-07-28 13:43:31	36.6063	27.8093	15.0417			1525	2020-08-04 11:25:07	36.8782	20.2405	10.4154
1526	2020-07-28 13:44:31	36.6334	27.7605	15.0374			1526	2020-08-04 11:26:07	36.8782	20.2405	10.4154
1527	2020-07-28 13:45:31	36.6334	27.6872	14.9963			1527	2020-08-04 11:27:07	36.8782	20.2405	10.4154
1528	2020-07-28 13:46:31	36.6334	27.6628	14.9825			1528	2020-08-04 11:28:07	36.9054	20.2405	10.4377
1529	2020-07-28 13:47:31	36.6334	27.5896	14.9413			1529	2020-08-04 11:29:07	36.9054	20.2649	10.4557
1530	2020-07-28 13:48:31	36.6334	27.5407	14.9138			1530	2020-08-04 11:30:07	36.9327	20.2893	10.4961
1531	2020-07-28 13:49:31	36.6334	27.5163	14.9			1531	2020-08-04 11:31:07	36.9327	20.2893	10.4961
1532	2020-07-28 13:50:31	36.6334	27.4431	14.8586			1532	2020-08-04 11:32:07	36.9327	20.2893	10.4961
1533	2020-07-28 13:51:31	36.6063	27.4431	14.8355			1533	2020-08-04 11:33:07	36.9327	20.2893	10.4961
1534	2020-07-28 13:52:31	36.6063	27.4187	14.8217			1534	2020-08-04 11:34:07	36.9327	20.2405	10.4599
1535	2020-07-28 13:53:31	36.6063	27.3454	14.7802			1535	2020-08-04 11:35:07	36.9327	20.2405	10.4599
1536	2020-07-28 13:54:31	36.6063	27.321	14.7663			1536	2020-08-04 11:36:07	36.9327	20.2405	10.4599
1537	2020-07-28 13:55:31	36.6063	27.321	14.7663			1537	2020-08-04 11:37:07	36.96	20.2405	10.4822
1538	2020-07-28 13:56:31	36.5791	27.2478	14.7016			1538	2020-08-04 11:38:07	36.9327	20.2405	10.4599
1539	2020-07-28 13:57:31	36.5791	27.2233	14.6877			1539	2020-08-04 11:39:07	36.9327	20.2405	10.4599
1540	2020-07-28 13:58:31	36.5791	27.2233	14.6877			1540	2020-08-04 11:40:07	36.9327	20.2405	10.4599
1541	2020-07-28 13:59:31	36.5791	27.1501	14.6459			1541	2020-08-04 11:41:07	36.9327	20.2405	10.4599
1542	2020-07-28 14:00:31	36.5791	27.1501	14.6459			1542	2020-08-04 11:42:07	36.9327	20.2405	10.4599
1543	2020-07-28 14:01:31	36.5791	27.1013	14.618			1543	2020-08-04 11:43:07	36.9327	20.2405	10.4599
1544	2020-07-28 14:02:31	36.5791	27.0768	14.604			1544	2020-08-04 11:44:07	36.9327	20.2405	10.4599
1545	2020-07-28 14:03:31	36.5791	27.0524	14.59			1545	2020-08-04 11:45:07	36.9327	20.2161	10.4418
1546	2020-07-28 14:04:31	36.5791	27.0036	14.562			1546	2020-08-04 11:46:07	36.9327	20.1428	10.3874
1547	2020-07-28 14:05:31	36.5791	26.9792	14.548			1547	2020-08-04 11:47:07	36.96	20.1428	10.4097
1548	2020-07-28 14:06:31	36.5791	26.9304	14.5199			1548	2020-08-04 11:48:07	36.96	20.1184	10.3915
1549	2020-07-28 14:07:31	36.5791	26.9304	14.5199			1549	2020-08-04 11:49:07	36.96	20.094	10.3733
1550	2020-07-28 14:08:31	36.5791	26.9059	14.5058			1550	2020-08-04 11:50:07	36.96	20.094	10.3733
1551	2020-07-28 14:09:31	36.5791	26.9059	14.5058			1551	2020-08-04 11:51:07	36.9327	20.094	10.351
1552	2020-07-28 14:10:31	36.5791	26.9059	14.5058			1552	2020-08-04 11:52:07	36.96	20.094	10.3733
1553	2020-07-28 14:11:31	36.5791	26.8815	14.4918			1553	2020-08-04 11:53:07	36.96	20.094	10.3733
1554	2020-07-28 14:12:31	36.5791	26.8815	14.4918			1554	2020-08-04 11:54:07	36.96	20.094	10.3733
1555	2020-07-28 14:13:31	36.5791	26.8327	14.4636			1555	2020-08-04 11:55:07	36.9327	20.0452	10.3145
1556	2020-07-28 14:14:31	36.5791	26.8327	14.4636			1556	2020-08-04 11:56:07	36.96	20.0208	10.3186
1557	2020-07-28 14:15:31	36.5791	26.8327	14.4636			1557	2020-08-04 11:57:07	36.96	20.0208	10.3186
1558	2020-07-28 14:16:31	36.5791	26.8083	14.4495			1558	2020-08-04 11:58:07	36.96	19.9719	10.282
1559	2020-07-28 14:17:31	36.5791	26.8083	14.4495			1559	2020-08-04 11:59:07	36.96	19.9475	10.2636
1560	2020-07-28 14:18:31	36.5791	26.8083	14.4495			1560	2020-08-04 12:00:07	36.96	19.9231	10.2453
1561	2020-07-28 14:19:31	36.6063	26.8083	14.4725			1561	2020-08-04 12:01:07	36.96	19.9231	10.2453
1562	2020-07-28 14:20:31	36.5791	26.8083	14.4495			1562	2020-08-04 12:02:07	36.96	19.8743	10.2086
1563	2020-07-28 14:21:31	36.5791	26.8083	14.4495			1563	2020-08-04 12:03:07	36.96	19.8743	10.2086
1564	2020-07-28 14:22:31	36.5791	26.8083	14.4495			1564	2020-08-04 12:04:07	36.96	19.8743	10.2086
1565	2020-07-28 14:23:31	36.5791	26.8327	14.4636			1565	2020-08-04 12:05:07	36.96	19.8498	10.1902
1566	2020-07-28 14:24:31	36.5791	26.8327	14.4636			1566	2020-08-04 12:06:07	36.96	19.8498	10.1902
1567	2020-07-28 14:25:31	36.5791	26.8327	14.4636			1567	2020-08-04 12:07:07	36.96	19.8254	10.1717
1568	2020-07-28 14:26:31	36.552	26.8327	14.4407			1568	2020-08-04 12:08:07	36.96	19.8254	10.1717
1569	2020-07-28 14:27:31	36.552	26.8327	14.4407			1569	2020-08-04 12:09:07	36.96	19.7766	10.1348
1570	2020-07-28 14:28:31	36.552	26.8815	14.4688			1570	2020-08-04 12:10:07	36.9872	19.7522	10.1386
1571	2020-07-28 14:29:31	36.552	26.9059	14.4829			1571	2020-08-04 12:11:07	36.96	19.7522	10.1163
1572	2020-07-28 14:30:31	36.552	26.9059	14.4829			1572	2020-08-04 12:12:07	36.96	19.7034	10.0793
1573	2020-07-28 14:31:31	36.5791	26.9059	14.5058			1573	2020-08-04 12:13:07	36.96	19.7278	10.0978
1574	2020-07-28 14:32:31	36.552	26.9059	14.4829			1574	2020-08-04 12:14:07	36.96	19.7034	10.0793
1575	2020-07-28 14:33:31	36.552	26.9304	14.4969			1575	2020-08-04 12:15:07	36.96	19.7522	10.1163
1576	2020-07-28 14:34:31	36.552	26.9304	14.4969			1576	2020-08-04 12:16:07	36.96	19.7522	10.1163
1577	2020-07-28 14:35:31	36.552	26.9548	14.511			1577	2020-08-04 12:17:07	36.96	19.7766	10.1348
1578	2020-07-28 14:36:31	36.552	27.0036	14.539			1578	2020-08-04 12:18:07	36.96	19.7766	10.1348
1579	2020-07-28 14:37:31	36.552	27.0524	14.567			1579	2020-08-04 12:19:07	36.96	19.8498	10.1902
1580	2020-07-28 14:38:31	36.5791	27.0524	14.59			1580	2020-08-04 12:20:07	36.9872	19.8498	10.2124
1581	2020-07-28 14:39:31	36.5791	27.0524	14.59			1581	2020-08-04 12:21:07	36.96	19.8743	10.2086
1582	2020-07-28 14:40:31	36.5791	27.0524	14.59			1582	2020-08-04 12:22:07	36.9872	19.8743	10.2308
1583	2020-07-28 14:41:31	36.5791	27.0524	14.59			1583	2020-08-04 12:23:07	36.9872	19.9231	10.2676
1584	2020-07-28 14:42:31	36.5791	27.0524	14.59			1584	2020-08-04 12:24:07	36.9872	19.9231	10.2676
1585	2020-07-28 14:43:31	36.5791	27.0524	14.59			1585	2020-08-04 12:25:07	36.9872	19.9231	10.2676
1586	2020-07-28 14:44:31	36.5791	27.0768	14.604			1586	2020-08-04 12:26:07	36.9872	19.9963	10.3225
1587	2020-07-28 14:45:31	36.5791	27.0768	14.604			1587	2020-08-04 12:27:07	36.9872	19.9719	10.3042
1588	2020-07-28 14:46:31	36.5791	27.0768	14.604			1588	2020-08-04 12:28:07	36.9872	20.0208	10.3408
1589	2020-07-28 14:47:31	36.5791	27.0524	14.59			1589	2020-08-04 12:29:07	37.0145	20.0208	10.3631
1590	2020-07-28 14:48:31	36.5791	27.0524	14.59			1590	2020-08-04 12:30:07	36.9872	20.0696	10.3773
1591	2020-07-28 14:49:31	36.5791	27.0524	14.59			1591	2020-08-04 12:31:07	37.0145	20.0696	10.3996
1592	2020-07-28 14:50:31	36.5791	26.9792	14.548			1592	2020-08-04 12:32:07	36.9872	20.094	10.3956
1593	2020-07-28 14:51:31	36.5791	26.9792	14.548			1593	2020-08-04 12:33:07	36.9872	20.094	10.3956
1594	2020-07-28 14:52:31	36.5791	26.9792	14.548			1594	2020-08-04 12:34:07	36.9872	20.094	10.3956
1595	2020-07-28 14:53:31	36.5791	26.9059	14.5058			1595	2020-08-04 12:35:07	36.9872	20.1428	10.432
1596	2020-07-28 14:54:31	36.5791	26.9059	14.5058			1596	2020-08-04 12:36:07	36.9872	20.1672	10.4501
1597	2020-07-28 14:55:31	36.552	26.8815	14.4688			1597	2020-08-04 12:37:07	36.9872	20.1672	10.4501
1598	2020-07-28 14:56:31	36.552	26.7839	14.4125			1598	2020-08-04 12:38:07	36.9872	20.1672	10.4501
1599	2020-07-28 14:57:31	36.552	26.7106	14.3701			1599	2020-08-04 12:39:07	37.0145	20.1672	10.4724
1600	2020-07-28 14:58:31	36.552	26.6618	14.3417			1600	2020-08-04 12:40:07	36.9872	20.1917	10.4683
1601	2020-07-28 14:59:31	36.5791	26.5641	14.3079			1601	2020-08-04 12:41:07	36.9872	20.1672	10.4501
1602	2020-07-28 15:00:31	36.552	26.442	14.2137			1602	2020-08-04 12:42:07	37.0145	20.1672	10.4724
1603	2020-07-28 15:01:31	36.5791	26.3688	14.1938			1603	2020-08-04 12:43:07	37.0145	20.1672	10.4724
1604	2020-07-28 15:02:31	36.552	26.2711	14.1135			1604	2020-08-04 12:44:07	37.0145	20.1672	10.4724
1605	2020-07-28 15:03:31	36.552	26.1491	14.0416			1605	2020-08-04 12:45:07	37.0145	20.1672	10.4724
1606	2020-07-28 15:04:31	36.552	26.0758	13.9983			1606	2020-08-04 12:46:07	37.0145	20.1917	10.4906
1607	2020-07-28 15:05:31	36.552	26.0514	13.9839			1607	2020-08-04 12:47:07	37.0145	20.2649	10.5449
1608	2020-07-28 15:06:31	36.552	25.9537	13.9259			1608	2020-08-04 12:48:07	37.0145	20.2649	10.5449
1609	2020-07-28 15:07:31	36.552	25.9049	13.8969			1609	2020-08-04 12:49:07	37.0145	20.3137	10.5811
1610	2020-07-28 15:08:31	36.552	25.8317	13.8532			1610	2020-08-04 12:50:07	37.0145	20.3382	10.5991
1611	2020-07-28 15:09:31	36.552	25.7828	13.8241			1611	2020-08-04 12:51:07	37.0145	20.3626	10.6171
1612	2020-07-28 15:10:31	36.5249	25.7096	13.7574			1612	2020-08-04 12:52:07	37.0145	20.4114	10.6531
1613	2020-07-28 15:11:31	36.5249	25.6363	13.7135			1613	2020-08-04 12:53:07	37.0418	20.3626	10.6395
1614	2020-07-28 15:12:31	36.5249	25.5631	13.6694			1614	2020-08-04 12:54:07	37.0418	20.4114	10.6754
1615	2020-07-28 15:13:31	36.5249	25.4654	13.6105			1615	2020-08-04 12:55:07	37.0145	20.4114	10.6531
1616	2020-07-28 15:14:31	36.552	25.441	13.6185			1616	2020-08-04 12:56:07	37.0145	20.4114	10.6531
1617	2020-07-28 15:15:31	36.5249	25.3678	13.5514			1617	2020-08-04 12:57:07	37.0145	20.4358	10.6711
1618	2020-07-28 15:16:31	36.552	25.3433	13.5594			1618	2020-08-04 12:58:07	37.0145	20.4358	10.6711
1619	2020-07-28 15:17:31	36.552	25.2945	13.5297			1619	2020-08-04 12:59:07	37.0145	20.4358	10.6711
1620	2020-07-28 15:18:31	36.552	25.2457	13.5			1620	2020-08-04 13:00:07	37.0418	20.4358	10.6934
1621	2020-07-28 15:19:31	36.552	25.1236	13.4255			1621	2020-08-04 13:01:07	37.0145	20.4358	10.6711
1622	2020-07-28 15:20:31	36.552	25.0748	13.3956			1622	2020-08-04 13:02:07	37.0145	20.4602	10.689
1623	2020-07-28 15:21:31	36.552	24.9771	13.3357			1623	2020-08-04 13:03:07	37.0145	20.4358	10.6711
1624	2020-07-28 15:22:31	36.552	24.9039	13.2906			1624	2020-08-04 13:04:07	37.0145	20.4358	10.6711
1625	2020-07-28 15:23:31	36.552	24.8062	13.2304			1625	2020-08-04 13:05:07	36.9872	20.4358	10.6487
1626	2020-07-28 15:24:31	36.5791	24.6597	13.1623			1626	2020-08-04 13:06:07	36.9872	20.4358	10.6487
1627	2020-07-28 15:25:31	36.5791	24.6109	13.1319			1627	2020-08-04 13:07:07	36.9872	20.4358	10.6487
1628	2020-07-28 15:26:31	36.5791	24.5376	13.0862			1628	2020-08-04 13:08:07	36.9872	20.4114	10.6308
1629	2020-07-28 15:27:31	36.5791	24.44	13.0251			1629	2020-08-04 13:09:07	36.9872	20.4114	10.6308
1630	2020-07-28 15:28:31	36.6063	24.3667	13.0019			1630	2020-08-04 13:10:07	36.9872	20.4114	10.6308
1631	2020-07-28 15:29:31	36.6063	24.3179	12.9711			1631	2020-08-04 13:11:07	36.9872	20.4114	10.6308
1632	2020-07-28 15:30:31	36.6063	24.2691	12.9404			1632	2020-08-04 13:12:07	36.9872	20.4114	10.6308
1633	2020-07-28 15:31:31	36.6063	24.2446	12.925			1633	2020-08-04 13:13:07	36.9872	20.4114	10.6308
1634	2020-07-28 15:32:31	36.6063	24.1714	12.8787			1634	2020-08-04 13:14:07	37.0145	20.3626	10.6171
1635	2020-07-28 15:33:31	36.6063	24.147	12.8632			1635	2020-08-04 13:15:07	37.0145	20.3626	10.6171
1636	2020-07-28 15:34:31	36.6063	24.0982	12.8323			1636	2020-08-04 13:16:07	37.0145	20.3626	10.6171
1637	2020-07-28 15:35:31	36.6063	24.0249	12.7857			1637	2020-08-04 13:17:07	37.0145	20.3626	10.6171
1638	2020-07-28 15:36:31	36.6063	24.0005	12.7702			1638	2020-08-04 13:18:07	37.0145	20.3382	10.5991
1639	2020-07-28 15:37:31	36.6063	23.9761	12.7547			1639	2020-08-04 13:19:07	37.0145	20.3382	10.5991
1640	2020-07-28 15:38:31	36.6063	23.9761	12.7547			1640	2020-08-04 13:20:07	37.0145	20.3137	10.5811
1641	2020-07-28 15:39:31	36.6063	23.9272	12.7235			1641	2020-08-04 13:21:07	37.0145	20.3137	10.5811
1642	2020-07-28 15:40:31	36.6063	23.9028	12.7079			1642	2020-08-04 13:22:07	37.0145	20.2649	10.5449
1643	2020-07-28 15:41:31	36.6063	23.9028	12.7079			1643	2020-08-04 13:23:07	37.0145	20.2649	10.5449
1644	2020-07-28 15:42:31	36.6063	23.8784	12.6923			1644	2020-08-04 13:24:07	37.0145	20.2649	10.5449
1645	2020-07-28 15:43:31	36.6063	23.8784	12.6923			1645	2020-08-04 13:25:07	37.0145	20.2649	10.5449
1646	2020-07-28 15:44:31	36.6063	23.8784	12.6923			1646	2020-08-04 13:26:07	37.0145	20.2405	10.5268
1647	2020-07-28 15:45:31	36.6063	23.8784	12.6923			1647	2020-08-04 13:27:07	37.0145	20.2405	10.5268
1648	2020-07-28 15:46:31	36.6063	23.8296	12.661			1648	2020-08-04 13:28:07	37.0145	20.1917	10.4906
1649	2020-07-28 15:47:31	36.6063	23.8296	12.661			1649	2020-08-04 13:29:07	37.0145	20.1917	10.4906
1650	2020-07-28 15:48:31	36.5791	23.8296	12.6384			1650	2020-08-04 13:30:07	37.0145	20.1672	10.4724
1651	2020-07-28 15:49:31	36.5791	23.8296	12.6384			1651	2020-08-04 13:31:07	37.0145	20.1672	10.4724
1652	2020-07-28 15:50:31	36.5791	23.8296	12.6384			1652	2020-08-04 13:32:07	37.0145	20.1428	10.4543
1653	2020-07-28 15:51:31	36.5791	23.8296	12.6384			1653	2020-08-04 13:33:07	37.0145	20.1428	10.4543
1654	2020-07-28 15:52:31	36.5791	23.8296	12.6384			1654	2020-08-04 13:34:07	36.9872	20.1428	10.432
1655	2020-07-28 15:53:31	36.5791	23.8052	12.6228			1655	2020-08-04 13:35:07	36.9872	20.1428	10.432
1656	2020-07-28 15:54:31	36.5791	23.8052	12.6228			1656	2020-08-04 13:36:07	36.9872	20.1428	10.432
1657	2020-07-28 15:55:31	36.5791	23.8052	12.6228			1657	2020-08-04 13:37:07	36.9872	20.1428	10.432
1658	2020-07-28 15:56:31	36.5791	23.8296	12.6384			1658	2020-08-04 13:38:07	36.9872	20.1428	10.432
1659	2020-07-28 15:57:31	36.5791	23.8296	12.6384			1659	2020-08-04 13:39:07	36.9872	20.1428	10.432
1660	2020-07-28 15:58:31	36.6063	23.8784	12.6923			1660	2020-08-04 13:40:07	36.9872	20.1672	10.4501
1661	2020-07-28 15:59:31	36.5791	23.9028	12.6853			1661	2020-08-04 13:41:07	36.9872	20.1672	10.4501
1662	2020-07-28 16:00:31	36.6063	23.9272	12.7235			1662	2020-08-04 13:42:07	36.9872	20.1672	10.4501
1663	2020-07-28 16:01:31	36.6063	23.9761	12.7547			1663	2020-08-04 13:43:07	36.9872	20.1672	10.4501
1664	2020-07-28 16:02:31	36.6063	24.0005	12.7702			1664	2020-08-04 13:44:07	36.9872	20.1428	10.432
1665	2020-07-28 16:03:31	36.6063	24.0737	12.8168			1665	2020-08-04 13:45:07	36.9872	20.1672	10.4501
1666	2020-07-28 16:04:31	36.6063	24.0737	12.8168			1666	2020-08-04 13:46:07	36.9872	20.1428	10.432
1667	2020-07-28 16:05:31	36.6063	24.0982	12.8323			1667	2020-08-04 13:47:07	36.96	20.1184	10.3915
1668	2020-07-28 16:06:31	36.6063	24.147	12.8632			1668	2020-08-04 13:48:07	36.9872	20.1184	10.4138
1669	2020-07-28 16:07:31	36.6063	24.147	12.8632			1669	2020-08-04 13:49:07	36.9872	20.1184	10.4138
1670	2020-07-28 16:08:31	36.6063	24.147	12.8632			1670	2020-08-04 13:50:07	36.96	20.094	10.3733
1671	2020-07-28 16:09:31	36.6063	24.147	12.8632			1671	2020-08-04 13:51:07	36.96	20.094	10.3733
1672	2020-07-28 16:10:31	36.6063	24.1714	12.8787			1672	2020-08-04 13:52:07	36.96	20.094	10.3733
1673	2020-07-28 16:11:31	36.6334	24.1714	12.9014			1673	2020-08-04 13:53:07	36.96	20.094	10.3733
1674	2020-07-28 16:12:31	36.6334	24.1958	12.9168			1674	2020-08-04 13:54:07	36.96	20.0452	10.3368
1675	2020-07-28 16:13:31	36.6334	24.2446	12.9477			1675	2020-08-04 13:55:07	36.96	20.0208	10.3186
1676	2020-07-28 16:14:31	36.6334	24.2691	12.9631			1676	2020-08-04 13:56:07	36.96	20.0208	10.3186
1677	2020-07-28 16:15:31	36.6334	24.2691	12.9631			1677	2020-08-04 13:57:07	36.96	20.0208	10.3186
1678	2020-07-28 16:16:31	36.6334	24.3179	12.9938			1678	2020-08-04 13:58:07	36.9872	20.0208	10.3408
1679	2020-07-28 16:17:31	36.6063	24.3179	12.9711			1679	2020-08-04 13:59:07	36.9872	20.0208	10.3408
1680	2020-07-28 16:18:31	36.6063	24.3179	12.9711			1680	2020-08-04 14:00:07	36.9872	20.0208	10.3408
1681	2020-07-28 16:19:31	36.6063	24.3179	12.9711			1681	2020-08-04 14:01:07	36.9872	20.0208	10.3408
1682	2020-07-28 16:20:31	36.6334	24.2691	12.9631			1682	2020-08-04 14:02:07	36.9872	20.0696	10.3773
1683	2020-07-28 16:21:31	36.6063	24.2691	12.9404			1683	2020-08-04 14:03:07	36.9872	20.0696	10.3773
1684	2020-07-28 16:22:31	36.6334	24.2446	12.9477			1684	2020-08-04 14:04:07	36.9872	20.094	10.3956
1685	2020-07-28 16:23:31	36.6063	24.1714	12.8787			1685	2020-08-04 14:05:07	36.96	20.1672	10.4278
1686	2020-07-28 16:24:31	36.6063	24.147	12.8632			1686	2020-08-04 14:06:07	36.9872	20.1917	10.4683
1687	2020-07-28 16:25:31	36.6334	24.0737	12.8394			1687	2020-08-04 14:07:07	36.96	20.2161	10.4641
1688	2020-07-28 16:26:31	36.6334	23.9761	12.7773			1688	2020-08-04 14:08:07	36.96	20.2405	10.4822
1689	2020-07-28 16:27:31	36.6334	23.9028	12.7306			1689	2020-08-04 14:09:07	36.9872	20.2893	10.5407
1690	2020-07-28 16:28:31	36.6334	23.8296	12.6837			1690	2020-08-04 14:10:07	36.9872	20.2893	10.5407
1691	2020-07-28 16:29:31	36.6334	23.7319	12.621			1691	2020-08-04 14:11:07	36.9872	20.3137	10.5588
1692	2020-07-28 16:30:31	36.6334	23.6343	12.558			1692	2020-08-04 14:12:07	36.9872	20.3137	10.5588
1693	2020-07-28 16:31:31	36.6334	23.561	12.5107			1693	2020-08-04 14:13:07	36.9872	20.3137	10.5588
1694	2020-07-28 16:32:31	36.6334	23.5122	12.4791			1694	2020-08-04 14:14:07	36.9872	20.3626	10.5948
1695	2020-07-28 16:33:31	36.6334	23.3901	12.3997			1695	2020-08-04 14:15:07	36.9872	20.3626	10.5948
1696	2020-07-28 16:34:31	36.6334	23.3169	12.3519			1696	2020-08-04 14:16:07	36.9872	20.4114	10.6308
1697	2020-07-28 16:35:31	36.6334	23.2192	12.288			1697	2020-08-04 14:17:07	36.9872	20.4358	10.6487
1698	2020-07-28 16:36:31	36.6334	23.1459	12.2399			1698	2020-08-04 14:18:07	36.9872	20.4114	10.6308
1699	2020-07-28 16:37:31	36.6334	23.0971	12.2078			1699	2020-08-04 14:19:07	36.9872	20.4602	10.6667
1700	2020-07-28 16:38:31	36.6063	23.0483	12.1531			1700	2020-08-04 14:20:07	36.9872	20.4602	10.6667
1701	2020-07-28 16:39:31	36.6063	23.0239	12.1369			1701	2020-08-04 14:21:07	36.9872	20.4602	10.6667
1702	2020-07-28 16:40:31	36.6063	22.9995	12.1208			1702	2020-08-04 14:22:07	36.9872	20.4602	10.6667
1703	2020-07-28 16:41:31	36.6063	22.9506	12.0885			1703	2020-08-04 14:23:07	36.9872	20.5091	10.7025
1704	2020-07-28 16:42:31	36.6063	22.9506	12.0885			1704	2020-08-04 14:24:07	36.9872	20.5091	10.7025
1705	2020-07-28 16:43:31	36.6063	22.9506	12.0885			1705	2020-08-04 14:25:07	36.9872	20.5335	10.7204
1706	2020-07-28 16:44:31	36.6063	22.9506	12.0885			1706	2020-08-04 14:26:07	36.96	20.5335	10.6981
1707	2020-07-28 16:45:31	36.6334	22.9262	12.0949			1707	2020-08-04 14:27:07	36.9872	20.5579	10.7383
1708	2020-07-28 16:46:31	36.6334	22.9262	12.0949			1708	2020-08-04 14:28:07	36.9872	20.6067	10.7739
1709	2020-07-28 16:47:31	36.6334	22.9262	12.0949			1709	2020-08-04 14:29:07	36.96	20.6311	10.7694
1710	2020-07-28 16:48:31	36.6334	22.9262	12.0949			1710	2020-08-04 14:30:07	36.96	20.6556	10.7872
1711	2020-07-28 16:49:31	36.6334	22.9262	12.0949			1711	2020-08-04 14:31:07	36.96	20.7288	10.8404
1712	2020-07-28 16:50:31	36.6063	22.8774	12.0399			1712	2020-08-04 14:32:07	36.96	20.7288	10.8404
1713	2020-07-28 16:51:31	36.6063	22.8774	12.0399			1713	2020-08-04 14:33:07	36.9872	20.7288	10.8628
1714	2020-07-28 16:52:31	36.6334	22.853	12.0462			1714	2020-08-04 14:34:07	36.9872	20.7532	10.8805
1715	2020-07-28 16:53:31	36.6334	22.853	12.0462			1715	2020-08-04 14:35:07	36.9872	20.8021	10.9159
1716	2020-07-28 16:54:31	36.6334	22.853	12.0462			1716	2020-08-04 14:36:07	36.96	20.8265	10.9112
1717	2020-07-28 16:55:31	36.6334	22.8774	12.0624			1717	2020-08-04 14:37:07	36.96	20.8265	10.9112
1718	2020-07-28 16:56:31	36.6334	22.853	12.0462			1718	2020-08-04 14:38:07	36.96	20.8753	10.9464
1719	2020-07-28 16:57:31	36.6334	22.853	12.0462			1719	2020-08-04 14:39:07	36.96	20.8509	10.9288
1720	2020-07-28 16:58:31	36.6334	22.8285	12.03			1720	2020-08-04 14:40:07	36.96	20.8509	10.9288
1721	2020-07-28 16:59:31	36.6334	22.8285	12.03			1721	2020-08-04 14:41:07	36.9872	20.8509	10.9512
1722	2020-07-28 17:00:31	36.6334	22.8285	12.03			1722	2020-08-04 14:42:07	36.9872	20.8509	10.9512
1723	2020-07-28 17:01:31	36.6334	22.8285	12.03			1723	2020-08-04 14:43:07	36.9872	20.8509	10.9512
1724	2020-07-28 17:02:31	36.6334	22.8285	12.03			1724	2020-08-04 14:44:07	36.9872	20.8509	10.9512
1725	2020-07-28 17:03:31	36.6334	22.8285	12.03			1725	2020-08-04 14:45:07	36.9872	20.8509	10.9512
1726	2020-07-28 17:04:31	36.6334	22.8285	12.03			1726	2020-08-04 14:46:07	36.9872	20.8265	10.9336
1727	2020-07-28 17:05:31	36.6063	22.8285	12.0075			1727	2020-08-04 14:47:07	36.9872	20.8509	10.9512
1728	2020-07-28 17:06:31	36.6063	22.8285	12.0075			1728	2020-08-04 14:48:07	36.9872	20.8021	10.9159
1729	2020-07-28 17:07:31	36.6334	22.7797	11.9975			1729	2020-08-04 14:49:07	36.9872	20.8021	10.9159
1730	2020-07-28 17:08:31	36.6334	22.8285	12.03			1730	2020-08-04 14:50:07	36.9872	20.8021	10.9159
1731	2020-07-28 17:09:31	36.6334	22.8285	12.03			1731	2020-08-04 14:51:07	36.9872	20.8021	10.9159
1732	2020-07-28 17:10:31	36.6334	22.8285	12.03			1732	2020-08-04 14:52:07	36.9872	20.7776	10.8982
1733	2020-07-28 17:11:31	36.6334	22.853	12.0462			1733	2020-08-04 14:53:07	36.9872	20.7776	10.8982
1734	2020-07-28 17:12:31	36.6334	22.853	12.0462			1734	2020-08-04 14:54:07	37.0145	20.7776	10.9206
1735	2020-07-28 17:13:31	36.6063	22.853	12.0237			1735	2020-08-04 14:55:07	37.0145	20.7532	10.9029
1736	2020-07-28 17:14:31	36.6063	22.853	12.0237			1736	2020-08-04 14:56:07	37.0145	20.7776	10.9206
1737	2020-07-28 17:15:31	36.6063	22.8774	12.0399			1737	2020-08-04 14:57:07	37.0145	20.7776	10.9206
1738	2020-07-28 17:16:31	36.6063	22.853	12.0237			1738	2020-08-04 14:58:07	37.0145	20.7776	10.9206
1739	2020-07-28 17:17:31	36.6063	22.8774	12.0399			1739	2020-08-04 14:59:07	37.0145	20.7776	10.9206
1740	2020-07-28 17:18:31	36.6063	22.8774	12.0399			1740	2020-08-04 15:00:07	37.0145	20.7776	10.9206
1741	2020-07-28 17:19:31	36.6063	22.8774	12.0399			1741	2020-08-04 15:01:07	37.0145	20.8021	10.9383
1742	2020-07-28 17:20:31	36.6334	22.8774	12.0624			1742	2020-08-04 15:02:07	37.0145	20.7776	10.9206
1743	2020-07-28 17:21:31	36.6334	22.8774	12.0624			1743	2020-08-04 15:03:07	37.0145	20.8021	10.9383
1744	2020-07-28 17:22:31	36.6063	22.9262	12.0723			1744	2020-08-04 15:04:07	37.0145	20.8021	10.9383
1745	2020-07-28 17:23:31	36.6063	22.9506	12.0885			1745	2020-08-04 15:05:07	37.0145	20.7776	10.9206
1746	2020-07-28 17:24:31	36.6063	23.0239	12.1369			1746	2020-08-04 15:06:07	37.0145	20.7776	10.9206
1747	2020-07-28 17:25:31	36.6063	23.0483	12.1531			1747	2020-08-04 15:07:07	37.0145	20.7776	10.9206
1748	2020-07-28 17:26:31	36.6063	23.0971	12.1852			1748	2020-08-04 15:08:07	37.0145	20.7776	10.9206
1749	2020-07-28 17:27:31	36.6063	23.1459	12.2174			1749	2020-08-04 15:09:07	37.0145	20.7776	10.9206
1750	2020-07-28 17:28:31	36.6334	23.1459	12.2399			1750	2020-08-04 15:10:07	37.0145	20.8021	10.9383
1751	2020-07-28 17:29:31	36.6063	23.1948	12.2494			1751	2020-08-04 15:11:07	37.0145	20.8021	10.9383
1752	2020-07-28 17:30:31	36.6334	23.2192	12.288			1752	2020-08-04 15:12:07	37.0145	20.7776	10.9206
1753	2020-07-28 17:31:31	36.6334	23.268	12.32			1753	2020-08-04 15:13:07	37.0145	20.8021	10.9383
1754	2020-07-28 17:32:31	36.6334	23.268	12.32			1754	2020-08-04 15:14:07	37.0145	20.7776	10.9206
1755	2020-07-28 17:33:31	36.6334	23.268	12.32			1755	2020-08-04 15:15:07	37.0145	20.7776	10.9206
1756	2020-07-28 17:34:31	36.6334	23.268	12.32			1756	2020-08-04 15:16:07	37.0145	20.7776	10.9206
1757	2020-07-28 17:35:31	36.6063	23.268	12.2974			1757	2020-08-04 15:17:07	37.0145	20.7776	10.9206
1758	2020-07-28 17:36:31	36.6063	23.268	12.2974			1758	2020-08-04 15:18:07	37.0145	20.7776	10.9206
1759	2020-07-28 17:37:31	36.6334	23.2192	12.288			1759	2020-08-04 15:19:07	37.0145	20.7776	10.9206
1760	2020-07-28 17:38:31	36.6334	23.1948	12.272			1760	2020-08-04 15:20:07	37.0145	20.7776	10.9206
1761	2020-07-28 17:39:31	36.6334	23.1215	12.2239			1761	2020-08-04 15:21:07	37.0145	20.7532	10.9029
1762	2020-07-28 17:40:31	36.6334	23.0483	12.1756			1762	2020-08-04 15:22:07	37.0145	20.7532	10.9029
1763	2020-07-28 17:41:31	36.6334	22.9995	12.1433			1763	2020-08-04 15:23:07	37.0145	20.7776	10.9206
1764	2020-07-28 17:42:31	36.6334	22.9506	12.111			1764	2020-08-04 15:24:07	37.0145	20.7532	10.9029
1765	2020-07-28 17:43:31	36.6334	22.9018	12.0787			1765	2020-08-04 15:25:07	37.0145	20.7532	10.9029
1766	2020-07-28 17:44:31	36.6334	22.853	12.0462			1766	2020-08-04 15:26:07	37.0145	20.7532	10.9029
1767	2020-07-28 17:45:31	36.6334	22.7797	11.9975			1767	2020-08-04 15:27:07	37.0145	20.7044	10.8674
1768	2020-07-28 17:46:31	36.6334	22.7797	11.9975			1768	2020-08-04 15:28:07	37.0145	20.7044	10.8674
1769	2020-07-28 17:47:31	36.6334	22.7797	11.9975			1769	2020-08-04 15:29:07	37.0145	20.7044	10.8674
1770	2020-07-28 17:48:31	36.6334	22.7309	11.9649			1770	2020-08-04 15:30:07	37.0145	20.68	10.8497
1771	2020-07-28 17:49:31	36.6334	22.7065	11.9486			1771	2020-08-04 15:31:07	37.0145	20.68	10.8497
1772	2020-07-28 17:50:31	36.6334	22.7065	11.9486			1772	2020-08-04 15:32:07	37.0145	20.68	10.8497
1773	2020-07-28 17:51:31	36.6334	22.6576	11.9159			1773	2020-08-04 15:33:07	37.0145	20.68	10.8497
1774	2020-07-28 17:52:31	36.6334	22.6576	11.9159			1774	2020-08-04 15:34:07	37.0145	20.68	10.8497
1775	2020-07-28 17:53:31	36.6334	22.6088	11.8831			1775	2020-08-04 15:35:07	37.0145	20.68	10.8497
1776	2020-07-28 17:54:31	36.6063	22.6088	11.8606			1776	2020-08-04 15:36:07	37.0145	20.7044	10.8674
1777	2020-07-28 17:55:31	36.6063	22.6088	11.8606			1777	2020-08-04 15:37:07	37.0145	20.7532	10.9029
1778	2020-07-28 17:56:31	36.6063	22.6088	11.8606			1778	2020-08-04 15:38:07	36.9872	20.7044	10.8451
1779	2020-07-28 17:57:31	36.6063	22.6576	11.8934			1779	2020-08-04 15:39:07	36.9872	20.7532	10.8805
1780	2020-07-28 17:58:31	36.6063	22.6576	11.8934			1780	2020-08-04 15:40:07	36.9872	20.7044	10.8451
1781	2020-07-28 17:59:31	36.6063	22.6576	11.8934			1781	2020-08-04 15:41:07	37.0145	20.7532	10.9029
1782	2020-07-28 18:00:31	36.6063	22.6576	11.8934			1782	2020-08-04 15:42:07	36.9872	20.7532	10.8805
1783	2020-07-28 18:01:31	36.6063	22.682	11.9097			1783	2020-08-04 15:43:07	37.0145	20.7532	10.9029
1784	2020-07-28 18:02:31	36.6063	22.682	11.9097			1784	2020-08-04 15:44:07	36.9872	20.7532	10.8805
1785	2020-07-28 18:03:31	36.6063	22.7065	11.926			1785	2020-08-04 15:45:07	36.9872	20.7532	10.8805
1786	2020-07-28 18:04:31	36.6063	22.7553	11.9587			1786	2020-08-04 15:46:07	37.0145	20.7532	10.9029
1787	2020-07-28 18:05:31	36.6063	22.7065	11.926			1787	2020-08-04 15:47:07	36.9872	20.7532	10.8805
1788	2020-07-28 18:06:31	36.6063	22.7553	11.9587			1788	2020-08-04 15:48:07	36.9872	20.7532	10.8805
1789	2020-07-28 18:07:31	36.6063	22.7065	11.926			1789	2020-08-04 15:49:07	36.9872	20.7532	10.8805
1790	2020-07-28 18:08:31	36.6063	22.682	11.9097			1790	2020-08-04 15:50:07	37.0145	20.7532	10.9029
1791	2020-07-28 18:09:31	36.6063	22.6576	11.8934			1791	2020-08-04 15:51:07	37.0145	20.7532	10.9029
1792	2020-07-28 18:10:31	36.6063	22.5844	11.8442			1792	2020-08-04 15:52:07	37.0145	20.7532	10.9029
1793	2020-07-28 18:11:31	36.6063	22.5111	11.795			1793	2020-08-04 15:53:07	37.0145	20.7776	10.9206
1794	2020-07-28 18:12:31	36.6334	22.4379	11.768			1794	2020-08-04 15:54:07	37.0145	20.8021	10.9383
1795	2020-07-28 18:13:31	36.6334	22.3891	11.735			1795	2020-08-04 15:55:07	37.0145	20.8509	10.9736
1796	2020-07-28 18:14:31	36.6334	22.3402	11.7019			1796	2020-08-04 15:56:07	37.0145	20.8753	10.9912
1797	2020-07-28 18:15:31	36.6334	22.2914	11.6688			1797	2020-08-04 15:57:07	37.0145	20.8997	11.0088
1798	2020-07-28 18:16:31	36.6334	22.1693	11.5856			1798	2020-08-04 15:58:07	37.0145	20.9485	11.044
1799	2020-07-28 18:17:31	36.6334	22.1205	11.5522			1799	2020-08-04 15:59:07	37.0145	20.973	11.0616
1800	2020-07-28 18:18:31	36.6334	22.0961	11.5355			1800	2020-08-04 16:00:07	37.0145	20.973	11.0616
1801	2020-07-28 18:19:31	36.6334	22.0472	11.5021			1801	2020-08-04 16:01:07	37.0145	20.973	11.0616
1802	2020-07-28 18:20:31	36.6334	21.9984	11.4685			1802	2020-08-04 16:02:07	37.0145	20.973	11.0616
1803	2020-07-28 18:21:31	36.6334	22.0228	11.4853			1803	2020-08-04 16:03:07	37.0145	21.0218	11.0966
1804	2020-07-28 18:22:31	36.6334	21.9984	11.4685			1804	2020-08-04 16:04:07	36.9872	21.0462	11.0917
1805	2020-07-28 18:23:31	36.6334	21.9984	11.4685			1805	2020-08-04 16:05:07	36.9872	21.0462	11.0917
1806	2020-07-28 18:24:31	36.6334	22.0228	11.4853			1806	2020-08-04 16:06:07	36.9872	21.0706	11.1092
1807	2020-07-28 18:25:31	36.6334	22.0228	11.4853			1807	2020-08-04 16:07:07	36.9872	21.1195	11.1441
1808	2020-07-28 18:26:31	36.6606	22.0717	11.5412			1808	2020-08-04 16:08:07	36.9872	21.1927	11.1963
1809	2020-07-28 18:27:31	36.6606	22.0961	11.558			1809	2020-08-04 16:09:07	37.0145	21.2171	11.2362
1810	2020-07-28 18:28:31	36.6606	22.0961	11.558			1810	2020-08-04 16:10:07	36.9872	21.2171	11.2137
1811	2020-07-28 18:29:31	36.6606	22.1205	11.5747			1811	2020-08-04 16:11:07	36.9872	21.2904	11.2658
1812	2020-07-28 18:30:31	36.6334	22.1937	11.6023			1812	2020-08-04 16:12:07	36.9872	21.2904	11.2658
1813	2020-07-28 18:31:31	36.6334	22.1937	11.6023			1813	2020-08-04 16:13:07	36.9872	21.3148	11.2831
1814	2020-07-28 18:32:31	36.6334	22.267	11.6522			1814	2020-08-04 16:14:07	36.9872	21.3392	11.3003
1815	2020-07-28 18:33:31	36.6334	22.2914	11.6688			1815	2020-08-04 16:15:07	36.9872	21.388	11.3349
1816	2020-07-28 18:34:31	36.6334	22.3402	11.7019			1816	2020-08-04 16:16:07	36.9872	21.388	11.3349
1817	2020-07-28 18:35:31	36.6334	22.3646	11.7185			1817	2020-08-04 16:17:07	36.9872	21.388	11.3349
1818	2020-07-28 18:36:31	36.6334	22.3891	11.735			1818	2020-08-04 16:18:07	36.9872	21.4124	11.3521
1819	2020-07-28 18:37:31	36.6334	22.4135	11.7515			1819	2020-08-04 16:19:07	36.9872	21.4124	11.3521
1820	2020-07-28 18:38:31	36.6606	22.4623	11.807			1820	2020-08-04 16:20:07	36.9872	21.4124	11.3521
1821	2020-07-28 18:39:31	36.6606	22.5111	11.8399			1821	2020-08-04 16:21:07	36.9872	21.4613	11.3865
1822	2020-07-28 18:40:31	36.6606	22.5356	11.8564			1822	2020-08-04 16:22:07	36.9872	21.4613	11.3865
1823	2020-07-28 18:41:31	36.6334	22.5356	11.8339			1823	2020-08-04 16:23:07	36.9872	21.4613	11.3865
1824	2020-07-28 18:42:31	36.6606	22.56	11.8728			1824	2020-08-04 16:24:07	36.9872	21.4613	11.3865
1825	2020-07-28 18:43:31	36.6606	22.6088	11.9056			1825	2020-08-04 16:25:07	36.9872	21.4124	11.3521
1826	2020-07-28 18:44:31	36.6606	22.6088	11.9056			1826	2020-08-04 16:26:07	36.9872	21.4613	11.3865
1827	2020-07-28 18:45:31	36.6606	22.6088	11.9056			1827	2020-08-04 16:27:07	36.9872	21.4613	11.3865
1828	2020-07-28 18:46:31	36.6334	22.6088	11.8831			1828	2020-08-04 16:28:07	36.9872	21.4124	11.3521
1829	2020-07-28 18:47:31	36.6334	22.6332	11.8995			1829	2020-08-04 16:29:07	36.9872	21.4124	11.3521
1830	2020-07-28 18:48:31	36.6334	22.6576	11.9159			1830	2020-08-04 16:30:07	37.0145	21.388	11.3573
1831	2020-07-28 18:49:31	36.6334	22.6576	11.9159			1831	2020-08-04 16:31:07	37.0145	21.4124	11.3746
1832	2020-07-28 18:50:31	36.6334	22.6576	11.9159			1832	2020-08-04 16:32:07	36.9872	21.4124	11.3521
1833	2020-07-28 18:51:31	36.6334	22.682	11.9322			1833	2020-08-04 16:33:07	36.9872	21.4124	11.3521
1834	2020-07-28 18:52:31	36.6334	22.682	11.9322			1834	2020-08-04 16:34:07	36.9872	21.4124	11.3521
1835	2020-07-28 18:53:31	36.6334	22.682	11.9322			1835	2020-08-04 16:35:07	36.9872	21.4124	11.3521
1836	2020-07-28 18:54:31	36.6334	22.682	11.9322			1836	2020-08-04 16:36:07	37.0145	21.4124	11.3746
1837	2020-07-28 18:55:31	36.6334	22.682	11.9322			1837	2020-08-04 16:37:07	37.0145	21.4124	11.3746
1838	2020-07-28 18:56:31	36.6334	22.682	11.9322			1838	2020-08-04 16:38:07	37.0145	21.4124	11.3746
1839	2020-07-28 18:57:31	36.6334	22.6576	11.9159			1839	2020-08-04 16:39:07	37.0145	21.388	11.3573
1840	2020-07-28 18:58:31	36.6334	22.6088	11.8831			1840	2020-08-04 16:40:07	37.0145	21.4124	11.3746
1841	2020-07-28 18:59:31	36.6334	22.6332	11.8995			1841	2020-08-04 16:41:07	37.0145	21.4124	11.3746
1842	2020-07-28 19:00:31	36.6334	22.5844	11.8667			1842	2020-08-04 16:42:07	36.9872	21.4613	11.3865
1843	2020-07-28 19:01:31	36.6334	22.56	11.8503			1843	2020-08-04 16:43:07	37.0145	21.4857	11.4262
1844	2020-07-28 19:02:31	36.6334	22.56	11.8503			1844	2020-08-04 16:44:07	36.9872	21.4857	11.4037
1845	2020-07-28 19:03:31	36.6334	22.5356	11.8339			1845	2020-08-04 16:45:07	36.9872	21.5589	11.4552
1846	2020-07-28 19:04:31	36.6606	22.5356	11.8564			1846	2020-08-04 16:46:07	37.0145	21.5589	11.4777
1847	2020-07-28 19:05:31	36.6606	22.5111	11.8399			1847	2020-08-04 16:47:07	37.0145	21.5833	11.4948
1848	2020-07-28 19:06:31	36.6606	22.5111	11.8399			1848	2020-08-04 16:48:07	37.0145	21.5833	11.4948
1849	2020-07-28 19:07:31	36.6877	22.5111	11.8624			1849	2020-08-04 16:49:07	36.9872	21.6322	11.5065
1850	2020-07-28 19:08:31	36.6877	22.5111	11.8624			1850	2020-08-04 16:50:07	36.9872	21.6566	11.5235
1851	2020-07-28 19:09:31	36.6877	22.5356	11.8789			1851	2020-08-04 16:51:07	36.9872	21.6566	11.5235
1852	2020-07-28 19:10:31	36.6877	22.5356	11.8789			1852	2020-08-04 16:52:07	36.9872	21.7298	11.5746
1853	2020-07-28 19:11:31	36.6877	22.5356	11.8789			1853	2020-08-04 16:53:07	36.9872	21.7298	11.5746
1854	2020-07-28 19:12:31	36.6877	22.6088	11.9281			1854	2020-08-04 16:54:07	36.9872	21.7298	11.5746
1855	2020-07-28 19:13:31	36.6877	22.6088	11.9281			1855	2020-08-04 16:55:07	36.9872	21.7298	11.5746
1856	2020-07-28 19:14:31	36.6877	22.6332	11.9445			1856	2020-08-04 16:56:07	36.9872	21.7543	11.5916
1857	2020-07-28 19:15:31	36.6877	22.6576	11.9609			1857	2020-08-04 16:57:07	36.9872	21.7543	11.5916
1858	2020-07-28 19:16:31	36.6877	22.7065	11.9936			1858	2020-08-04 16:58:07	37.0145	21.7298	11.5971
1859	2020-07-28 19:17:31	36.6606	22.7065	11.9711			1859	2020-08-04 16:59:07	37.0145	21.7298	11.5971
1860	2020-07-28 19:18:31	36.6606	22.7309	11.9874			1860	2020-08-04 17:00:07	36.9872	21.7298	11.5746
1861	2020-07-28 19:19:31	36.6606	22.7309	11.9874			1861	2020-08-04 17:01:07	36.9872	21.7298	11.5746
1862	2020-07-28 19:20:31	36.6606	22.7797	12.02			1862	2020-08-04 17:02:07	36.9872	21.7298	11.5746
1863	2020-07-28 19:21:31	36.6606	22.7797	12.02			1863	2020-08-04 17:03:07	36.9872	21.7298	11.5746
1864	2020-07-28 19:22:31	36.6606	22.7797	12.02			1864	2020-08-04 17:04:07	36.9872	21.681	11.5406
1865	2020-07-28 19:23:31	36.6606	22.8041	12.0363			1865	2020-08-04 17:05:07	37.0145	21.681	11.5631
1866	2020-07-28 19:24:31	36.6606	22.8041	12.0363			1866	2020-08-04 17:06:07	37.0145	21.681	11.5631
1867	2020-07-28 19:25:31	36.6606	22.8041	12.0363			1867	2020-08-04 17:07:07	36.9872	21.6566	11.5235
1868	2020-07-28 19:26:31	36.6606	22.8041	12.0363			1868	2020-08-04 17:08:07	36.9872	21.6566	11.5235
1869	2020-07-28 19:27:31	36.6606	22.8041	12.0363			1869	2020-08-04 17:09:07	36.9872	21.6566	11.5235
1870	2020-07-28 19:28:31	36.6606	22.8285	12.0525			1870	2020-08-04 17:10:07	36.9872	21.6566	11.5235
1871	2020-07-28 19:29:31	36.6606	22.8285	12.0525			1871	2020-08-04 17:11:07	36.9872	21.6078	11.4894
1872	2020-07-28 19:30:31	36.6334	22.8285	12.03			1872	2020-08-04 17:12:07	37.0145	21.5833	11.4948
1873	2020-07-28 19:31:31	36.6334	22.8774	12.0624			1873	2020-08-04 17:13:07	37.0145	21.5589	11.4777
1874	2020-07-28 19:32:31	36.6334	22.8774	12.0624			1874	2020-08-04 17:14:07	37.0145	21.5589	11.4777
1875	2020-07-28 19:33:31	36.6334	22.853	12.0462			1875	2020-08-04 17:15:07	37.0145	21.5101	11.4434
1876	2020-07-28 19:34:31	36.6334	22.853	12.0462			1876	2020-08-04 17:16:07	37.0145	21.5101	11.4434
1877	2020-07-28 19:35:31	36.6334	22.853	12.0462			1877	2020-08-04 17:17:07	37.0145	21.4857	11.4262
1878	2020-07-28 19:36:31	36.6334	22.853	12.0462			1878	2020-08-04 17:18:07	37.0145	21.4613	11.409
1879	2020-07-28 19:37:31	36.6334	22.8774	12.0624			1879	2020-08-04 17:19:07	36.9872	21.4613	11.3865
1880	2020-07-28 19:38:31	36.6334	22.8774	12.0624			1880	2020-08-04 17:20:07	37.0145	21.4613	11.409
1881	2020-07-28 19:39:31	36.6063	22.9262	12.0723			1881	2020-08-04 17:21:07	37.0145	21.4124	11.3746
1882	2020-07-28 19:40:31	36.6063	22.8774	12.0399			1882	2020-08-04 17:22:07	37.0145	21.4124	11.3746
1883	2020-07-28 19:41:31	36.6334	22.9262	12.0949			1883	2020-08-04 17:23:07	37.0418	21.388	11.3798
1884	2020-07-28 19:42:31	36.6063	22.9262	12.0723			1884	2020-08-04 17:24:07	37.0145	21.388	11.3573
1885	2020-07-28 19:43:31	36.6063	22.9506	12.0885			1885	2020-08-04 17:25:07	37.0418	21.388	11.3798
1886	2020-07-28 19:44:31	36.6063	22.9995	12.1208			1886	2020-08-04 17:26:07	37.0418	21.3392	11.3453
1887	2020-07-28 19:45:31	36.6063	22.9995	12.1208			1887	2020-08-04 17:27:07	37.0418	21.3148	11.328
1888	2020-07-28 19:46:31	36.6063	23.0239	12.1369			1888	2020-08-04 17:28:07	37.0418	21.3148	11.328
1889	2020-07-28 19:47:31	36.6063	23.0483	12.1531			1889	2020-08-04 17:29:07	37.0418	21.3148	11.328
1890	2020-07-28 19:48:31	36.6063	23.0483	12.1531			1890	2020-08-04 17:30:07	37.0418	21.3148	11.328
1891	2020-07-28 19:49:31	36.6063	23.0971	12.1852			1891	2020-08-04 17:31:07	37.0418	21.2904	11.3107
1892	2020-07-28 19:50:31	36.6063	23.1215	12.2013			1892	2020-08-04 17:32:07	37.0418	21.3148	11.328
1893	2020-07-28 19:51:31	36.6063	23.1459	12.2174			1893	2020-08-04 17:33:07	37.0418	21.3392	11.3453
1894	2020-07-28 19:52:31	36.6063	23.1948	12.2494			1894	2020-08-04 17:34:07	37.0418	21.388	11.3798
1895	2020-07-28 19:53:31	36.6063	23.2192	12.2655			1895	2020-08-04 17:35:07	37.0418	21.388	11.3798
1896	2020-07-28 19:54:31	36.6063	23.2192	12.2655			1896	2020-08-04 17:36:07	37.0418	21.4124	11.397
1897	2020-07-28 19:55:31	36.6334	23.268	12.32			1897	2020-08-04 17:37:07	37.0418	21.4124	11.397
1898	2020-07-28 19:56:31	36.6334	23.268	12.32			1898	2020-08-04 17:38:07	37.0418	21.4613	11.4315
1899	2020-07-28 19:57:31	36.6334	23.2924	12.336			1899	2020-08-04 17:39:07	37.0145	21.4613	11.409
1900	2020-07-28 19:58:31	36.6334	23.3169	12.3519			1900	2020-08-04 17:40:07	37.0145	21.4613	11.409
1901	2020-07-28 19:59:31	36.6334	23.3169	12.3519			1901	2020-08-04 17:41:07	37.0145	21.4613	11.409
1902	2020-07-28 20:00:31	36.6334	23.3413	12.3679			1902	2020-08-04 17:42:07	37.0145	21.4613	11.409
1903	2020-07-28 20:01:31	36.6334	23.3413	12.3679			1903	2020-08-04 17:43:07	37.0145	21.4124	11.3746
1904	2020-07-28 20:02:31	36.6606	23.3413	12.3905			1904	2020-08-04 17:44:07	37.0145	21.4613	11.409
1905	2020-07-28 20:03:31	36.6606	23.3169	12.3745			1905	2020-08-04 17:45:07	37.0145	21.4613	11.409
1906	2020-07-28 20:04:31	36.6606	23.268	12.3426			1906	2020-08-04 17:46:07	37.0145	21.4613	11.409
1907	2020-07-28 20:05:31	36.6606	23.268	12.3426			1907	2020-08-04 17:47:07	37.0145	21.4613	11.409
1908	2020-07-28 20:06:31	36.6606	23.268	12.3426			1908	2020-08-04 17:48:07	37.0145	21.4613	11.409
1909	2020-07-28 20:07:31	36.6606	23.2436	12.3266			1909	2020-08-04 17:49:07	36.9872	21.4857	11.4037
1910	2020-07-28 20:08:31	36.6606	23.2436	12.3266			1910	2020-08-04 17:50:07	37.0145	21.4857	11.4262
1911	2020-07-28 20:09:31	36.6606	23.2436	12.3266			1911	2020-08-04 17:51:07	37.0145	21.4857	11.4262
1912	2020-07-28 20:10:31	36.6334	23.268	12.32			1912	2020-08-04 17:52:07	37.0145	21.5101	11.4434
1913	2020-07-28 20:11:31	36.6334	23.268	12.32			1913	2020-08-04 17:53:07	37.0145	21.5101	11.4434
1914	2020-07-28 20:12:31	36.6334	23.2924	12.336			1914	2020-08-04 17:54:07	37.0145	21.5589	11.4777
1915	2020-07-28 20:13:31	36.6334	23.3169	12.3519			1915	2020-08-04 17:55:07	37.0145	21.5589	11.4777
1916	2020-07-28 20:14:31	36.6334	23.3169	12.3519			1916	2020-08-04 17:56:07	37.0145	21.5833	11.4948
1917	2020-07-28 20:15:31	36.6334	23.3657	12.3838			1917	2020-08-04 17:57:07	37.0145	21.6322	11.529
1918	2020-07-28 20:16:31	36.6334	23.3657	12.3838			1918	2020-08-04 17:58:07	37.0145	21.6322	11.529
1919	2020-07-28 20:17:31	36.6334	23.3657	12.3838			1919	2020-08-04 17:59:07	37.0418	21.6322	11.5515
1920	2020-07-28 20:18:31	36.6334	23.3657	12.3838			1920	2020-08-04 18:00:07	37.0418	21.5589	11.5001
1921	2020-07-28 20:19:31	36.6334	23.3657	12.3838			1921	2020-08-04 18:01:07	37.0418	21.5101	11.4658
1922	2020-07-28 20:20:31	36.6334	23.3169	12.3519			1922	2020-08-04 18:02:07	37.0418	21.4857	11.4487
1923	2020-07-28 20:21:31	36.6334	23.2924	12.336			1923	2020-08-04 18:03:07	37.0418	21.4857	11.4487
1924	2020-07-28 20:22:31	36.6334	23.268	12.32			1924	2020-08-04 18:04:07	37.0418	21.4124	11.397
1925	2020-07-28 20:23:31	36.6334	23.2436	12.304			1925	2020-08-04 18:05:07	37.0418	21.388	11.3798
1926	2020-07-28 20:24:31	36.6334	23.1948	12.272			1926	2020-08-04 18:06:07	37.0418	21.388	11.3798
1927	2020-07-28 20:25:31	36.6063	23.1459	12.2174			1927	2020-08-04 18:07:07	37.0418	21.3392	11.3453
1928	2020-07-28 20:26:31	36.6334	23.0971	12.2078			1928	2020-08-04 18:08:07	37.0418	21.2904	11.3107
1929	2020-07-28 20:27:31	36.6334	23.0483	12.1756			1929	2020-08-04 18:09:07	37.0418	21.2415	11.276
1930	2020-07-28 20:28:31	36.6334	22.9995	12.1433			1930	2020-08-04 18:10:07	37.0418	21.2171	11.2586
1931	2020-07-28 20:29:31	36.6334	22.8774	12.0624			1931	2020-08-04 18:11:07	37.0418	21.1927	11.2412
1932	2020-07-28 20:30:31	36.6334	22.8285	12.03			1932	2020-08-04 18:12:07	37.0418	21.1439	11.2064
1933	2020-07-28 20:31:31	36.6334	22.7797	11.9975			1933	2020-08-04 18:13:07	37.0145	21.1195	11.1665
1934	2020-07-28 20:32:31	36.6334	22.7065	11.9486			1934	2020-08-04 18:14:07	37.0418	21.0706	11.154
1935	2020-07-28 20:33:31	36.6334	22.6576	11.9159			1935	2020-08-04 18:15:07	37.0145	21.0462	11.1141
1936	2020-07-28 20:34:31	36.6334	22.6088	11.8831			1936	2020-08-04 18:16:07	37.0145	21.0218	11.0966
1937	2020-07-28 20:35:31	36.6334	22.5844	11.8667			1937	2020-08-04 18:17:07	37.0145	20.973	11.0616
1938	2020-07-28 20:36:31	36.6334	22.56	11.8503			1938	2020-08-04 18:18:07	37.0145	20.9485	11.044
1939	2020-07-28 20:37:31	36.6334	22.5111	11.8175			1939	2020-08-04 18:19:07	36.9872	20.8997	10.9864
1940	2020-07-28 20:38:31	36.6334	22.5111	11.8175			1940	2020-08-04 18:20:07	36.9872	20.8753	10.9688
1941	2020-07-28 20:39:31	36.6334	22.5111	11.8175			1941	2020-08-04 18:21:07	36.9872	20.8509	10.9512
1942	2020-07-28 20:40:31	36.6334	22.5111	11.8175			1942	2020-08-04 18:22:07	36.9327	20.1428	10.3874
1943	2020-07-28 20:41:31	36.6334	22.5111	11.8175			1943	2020-08-04 18:23:07	36.9872	20.2893	10.5407
1944	2020-07-28 20:42:31	36.6334	22.56	11.8503			1944	2020-08-04 18:24:07	37.0418	20.3626	10.6395
1945	2020-07-28 20:43:31	36.6334	22.56	11.8503			1945	2020-08-04 18:25:07	37.0691	20.4114	10.6978
1946	2020-07-28 20:44:31	36.6334	22.5111	11.8175			1946	2020-08-04 18:26:07	37.0965	20.4358	10.7381
1947	2020-07-28 20:45:31	36.6334	22.56	11.8503			1947	2020-08-04 18:27:07	37.0691	20.4602	10.7337
1948	2020-07-28 20:46:31	36.6334	22.5111	11.8175			1948	2020-08-04 18:28:07	37.0691	20.4846	10.7516
1949	2020-07-28 20:47:31	36.6334	22.5111	11.8175			1949	2020-08-04 18:29:07	37.0691	20.5335	10.7875
1950	2020-07-28 20:48:31	36.6334	22.4379	11.768			1950	2020-08-04 18:30:07	37.0418	20.5091	10.7472
1951	2020-07-28 20:49:31	36.6334	22.3891	11.735			1951	2020-08-04 18:31:07	37.0418	20.5091	10.7472
1952	2020-07-28 20:50:31	36.6334	22.3158	11.6854			1952	2020-08-04 18:32:07	37.0418	20.5091	10.7472
1953	2020-07-28 20:51:31	36.6334	22.2426	11.6356			1953	2020-08-04 18:33:07	37.0418	20.5091	10.7472
1954	2020-07-28 20:52:31	36.6334	22.1693	11.5856			1954	2020-08-04 18:34:07	37.0418	20.5091	10.7472
1955	2020-07-28 20:53:31	36.6606	22.1205	11.5747			1955	2020-08-04 18:35:07	37.0418	20.5091	10.7472
1956	2020-07-28 20:54:31	36.6334	22.0228	11.4853			1956	2020-08-04 18:36:07	37.0418	20.5091	10.7472
1957	2020-07-28 20:55:31	36.6606	21.9496	11.4573			1957	2020-08-04 18:37:07	37.0418	20.4602	10.7114
1958	2020-07-28 20:56:31	36.6606	21.9008	11.4237			1958	2020-08-04 18:38:07	37.0418	20.4358	10.6934
1959	2020-07-28 20:57:31	36.6334	21.8275	11.3506			1959	2020-08-04 18:39:07	37.0418	20.4114	10.6754
1960	2020-07-28 20:58:31	36.6606	21.7054	11.2883			1960	2020-08-04 18:40:07	37.0145	20.3626	10.6171
1961	2020-07-28 20:59:31	36.6334	21.6322	11.2149			1961	2020-08-04 18:41:07	37.0145	20.3382	10.5991
1962	2020-07-28 21:00:31	36.6334	21.5589	11.1637			1962	2020-08-04 18:42:07	37.0145	20.3382	10.5991
1963	2020-07-28 21:01:31	36.6334	21.4613	11.0952			1963	2020-08-04 18:43:07	37.0145	20.3137	10.5811
1964	2020-07-28 21:02:31	36.6334	21.3636	11.0265			1964	2020-08-04 18:44:07	37.0145	20.3137	10.5811
1965	2020-07-28 21:03:31	36.6334	21.2904	10.9747			1965	2020-08-04 18:45:07	36.9872	20.2649	10.5226
1966	2020-07-28 21:04:31	36.6334	21.2415	10.9401			1966	2020-08-04 18:46:07	36.9872	20.2649	10.5226
1967	2020-07-28 21:05:31	36.6063	21.1683	10.8658			1967	2020-08-04 18:47:07	36.9872	20.2405	10.5045
1968	2020-07-28 21:06:31	36.6063	21.095	10.8136			1968	2020-08-04 18:48:07	36.9872	20.2405	10.5045
1969	2020-07-28 21:07:31	36.6063	20.9974	10.7438			1969	2020-08-04 18:49:07	36.9872	20.1917	10.4683
1970	2020-07-28 21:08:31	36.6063	20.9241	10.6913			1970	2020-08-04 18:50:07	36.9872	20.1917	10.4683
1971	2020-07-28 21:09:31	36.6063	20.8997	10.6738			1971	2020-08-04 18:51:07	36.9872	20.1428	10.432
1972	2020-07-28 21:10:31	36.6063	20.8265	10.621			1972	2020-08-04 18:52:07	36.9872	20.094	10.3956
1973	2020-07-28 21:11:31	36.5791	20.8021	10.5811			1973	2020-08-04 18:53:07	36.9872	20.094	10.3956
1974	2020-07-28 21:12:31	36.5791	20.7532	10.5458			1974	2020-08-04 18:54:07	36.9872	20.094	10.3956
1975	2020-07-28 21:13:31	36.5791	20.7288	10.5282			1975	2020-08-04 18:55:07	36.96	20.0452	10.3368
1976	2020-07-28 21:14:31	36.5791	20.68	10.4928			1976	2020-08-04 18:56:07	36.9872	20.0208	10.3408
1977	2020-07-28 21:15:31	36.5791	20.6556	10.4751			1977	2020-08-04 18:57:07	36.96	20.0208	10.3186
1978	2020-07-28 21:16:31	36.5791	20.6556	10.4751			1978	2020-08-04 18:58:07	36.9872	19.9719	10.3042
1979	2020-07-28 21:17:31	36.5791	20.6556	10.4751			1979	2020-08-04 18:59:07	36.96	19.9475	10.2636
1980	2020-07-28 21:18:31	36.6063	20.6311	10.4796			1980	2020-08-04 19:00:07	36.96	19.9719	10.282
1981	2020-07-28 21:19:31	36.6063	20.6311	10.4796			1981	2020-08-04 19:01:07	36.96	19.9475	10.2636
1982	2020-07-28 21:20:31	36.6063	20.6311	10.4796			1982	2020-08-04 19:02:07	36.96	19.9719	10.282
1983	2020-07-28 21:21:31	36.6063	20.5823	10.444			1983	2020-08-04 19:03:07	36.96	19.9475	10.2636
1984	2020-07-28 21:22:31	36.6334	20.5823	10.4662			1984	2020-08-04 19:04:07	36.96	19.9475	10.2636
1985	2020-07-28 21:23:31	36.6334	20.5823	10.4662			1985	2020-08-04 19:05:07	36.96	19.9475	10.2636
1986	2020-07-28 21:24:31	36.6063	20.5579	10.4262			1986	2020-08-04 19:06:07	36.9872	19.9231	10.2676
1987	2020-07-28 21:25:31	36.6334	20.5579	10.4484			1987	2020-08-04 19:07:07	36.9872	19.8743	10.2308
1988	2020-07-28 21:26:31	36.6334	20.5823	10.4662			1988	2020-08-04 19:08:07	36.9872	19.8743	10.2308
1989	2020-07-28 21:27:31	36.6063	20.5579	10.4262			1989	2020-08-04 19:09:07	36.9872	19.8743	10.2308
1990	2020-07-28 21:28:31	36.6063	20.5579	10.4262			1990	2020-08-04 19:10:07	36.9872	19.8743	10.2308
1991	2020-07-28 21:29:31	36.6063	20.5579	10.4262			1991	2020-08-04 19:11:07	36.9872	19.8743	10.2308
1992	2020-07-28 21:30:31	36.6063	20.5823	10.444			1992	2020-08-04 19:12:07	36.9872	19.8743	10.2308
1993	2020-07-28 21:31:31	36.6063	20.5823	10.444			1993	2020-08-04 19:13:07	36.9872	19.8743	10.2308
1994	2020-07-28 21:32:31	36.6063	20.5823	10.444			1994	2020-08-04 19:14:07	36.9872	19.8743	10.2308
1995	2020-07-28 21:33:31	36.6063	20.5823	10.444			1995	2020-08-04 19:15:07	36.9872	19.8498	10.2124
1996	2020-07-28 21:34:31	36.6334	20.5823	10.4662			1996	2020-08-04 19:16:07	36.9872	19.8254	10.194
[truncated: 29,908 more rows]
