# Supplementary material
Source: publisher figshare collection journal article supplement (https://frontiersin.figshare.com/ndownloader/files/28396665)
Supplement: Supplementary file 2 [file 28396665 › Table 8.XLSX]

## Sheet: Table 8
Empirical data over the increase in gas-cell volume over incubation
Volume[m^3]\Day
1	6e-07	4e-07	5e-07	5e-07	3e-07	4e-07	5e-07	4e-07	4e-07	4e-07
2	6e-07	4e-07	0	5e-07	5e-07	4e-07	6e-07	5e-07	7e-07	6e-07
3	7e-07	7e-07	6e-07	6e-07	7e-07	8e-07	8e-07	6e-07	5e-07	6e-07
4	1.2e-06	9e-07	9e-07	7e-07	1e-06	7e-07	7e-07	8e-07	7e-07	0
8	1.6e-06	1.5e-06	1.4e-07	2e-06	1.5e-06	2e-06	1.6e-06	1.8e-06	1.5e-06	1.6e-06
9	1.8e-06	2e-06	1.5e-06	2.2e-06	1.7e-06	2.2e-06	1.6e-06	1.4e-06	2e-06	1.7e-06
10	2.3e-06	1.6e-06	1.7e-06	2.3e-06	1.9e-06	2.1e-06	2e-06	1.8e-06	1.8e-06	2e-06
11	2.6e-06	2.5e-06	2.7e-06	3.2e-06	1.7e-06	2.2e-06	1.7e-06	1.8e-06	2.2e-06	1.4e-06
